# Supplementary material for: Pleiotropic effects of BAFF on the senescence-associated secretome and growth arrest
Source: eLife journal article supplement (doi:10.7554/elife.84238), 2023-03-27
Supplement: fig2-data2 [file Figure 2 uncropped blots labeled.pdf › z Figure 2-Source Data 2/Figure 2-Source Data 2/Figure 2 uncropped blots labeled.pdf]

Colorimetric

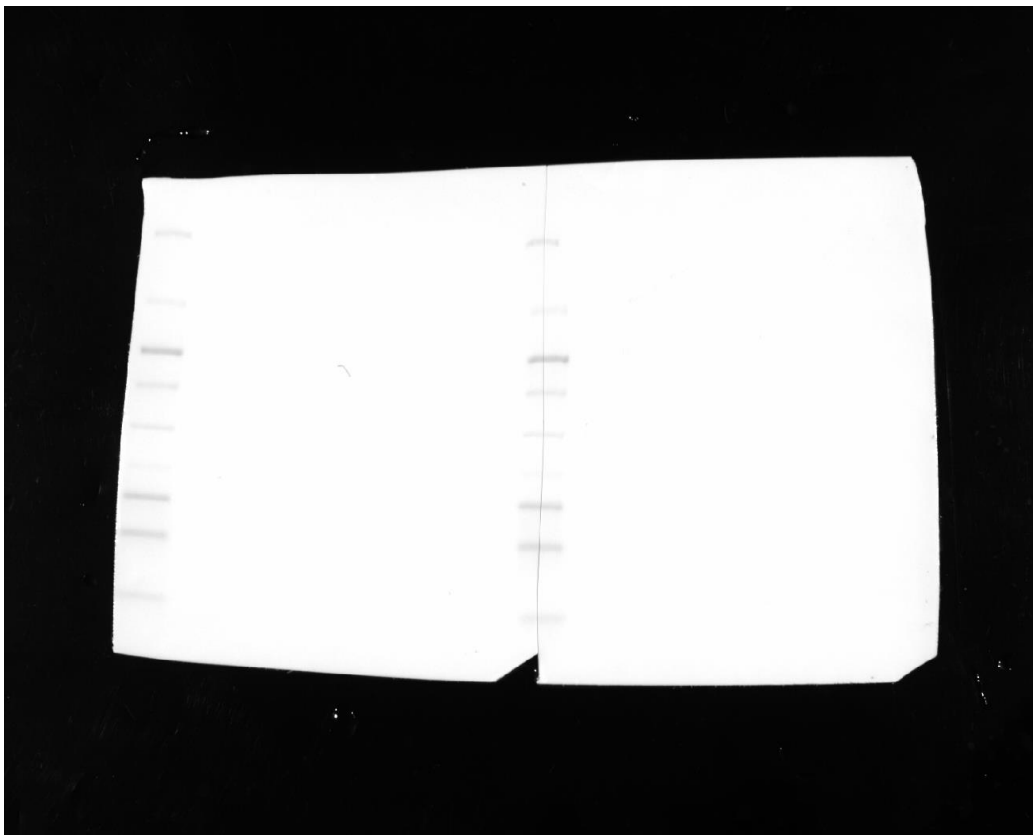

Ponceau

| CYTO                                                                                |   | NUC |   | IR |
|-------------------------------------------------------------------------------------|---|-----|---|----|
| -                                                                                   | + | -   | + |    |
| 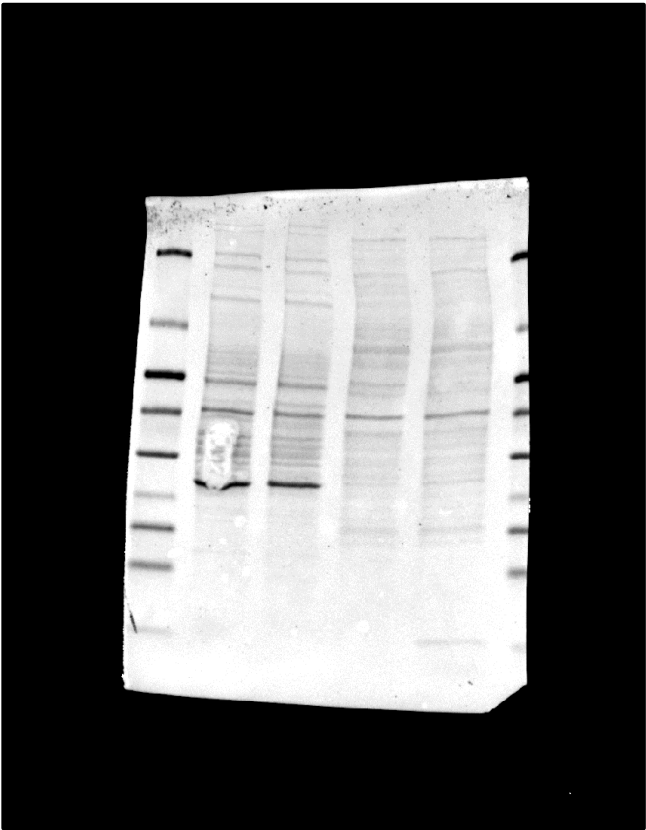 |   |     |   |    |

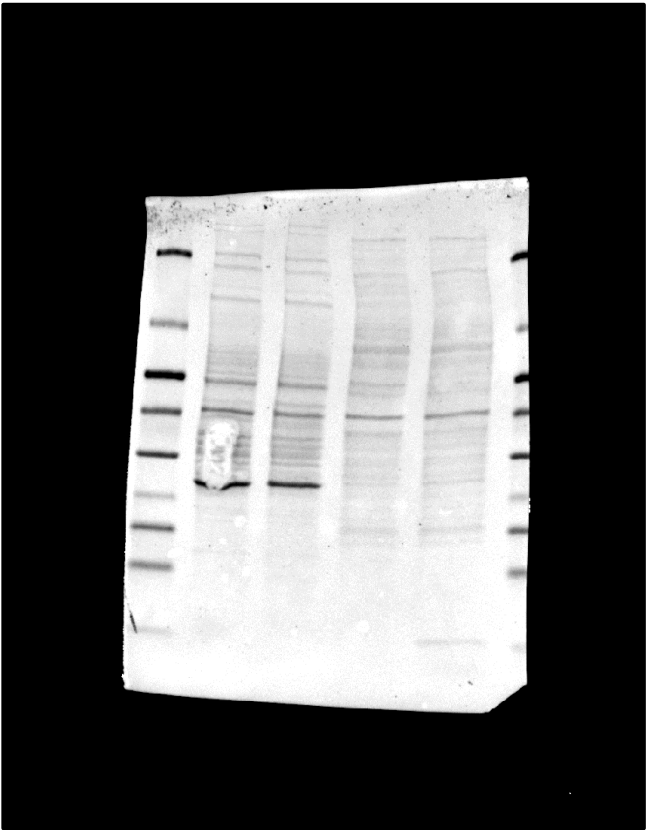

IRF1

| CYTO                                                                                 |   | NUC |   | IR |
|--------------------------------------------------------------------------------------|---|-----|---|----|
| -                                                                                    | + | -   | + |    |
| 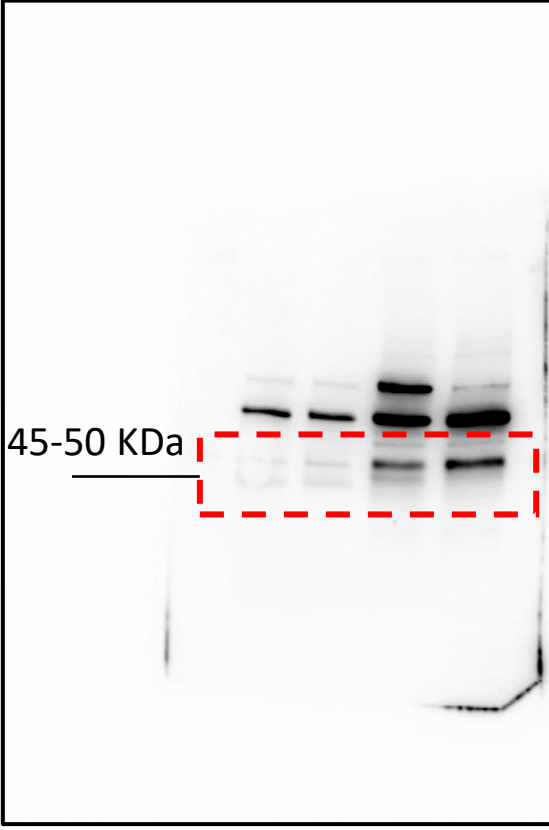 |   |     |   |    |

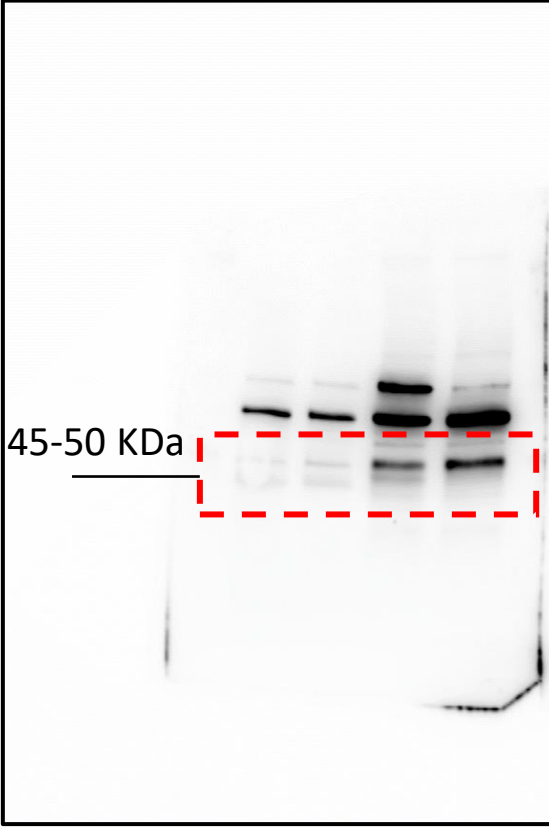

IRF2

| CYTO                                                                                  |   | NUC |   | IR |
|---------------------------------------------------------------------------------------|---|-----|---|----|
| -                                                                                     | + | -   | + |    |
| 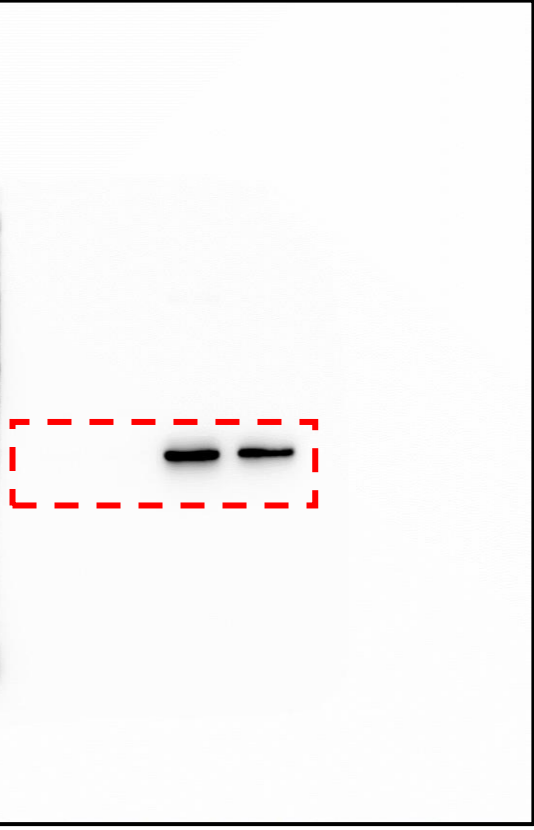 |   |     |   |    |

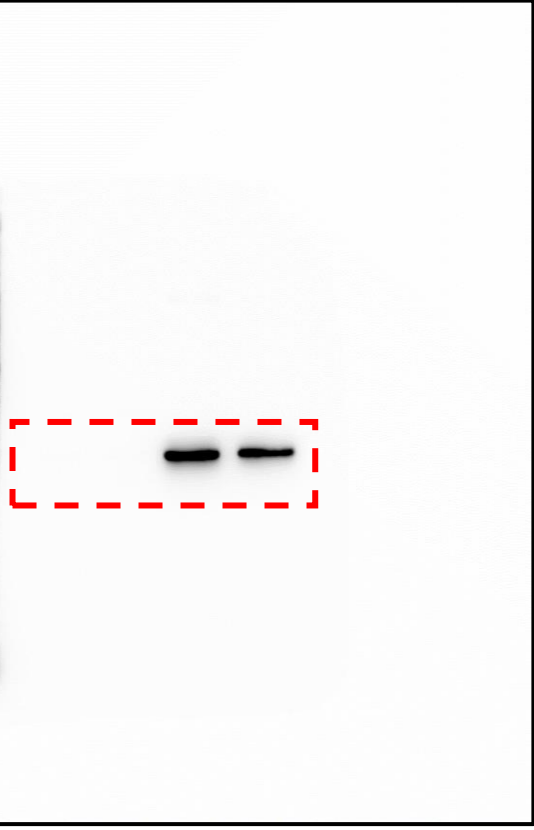

PARP1

| CYTO                                                                               |   | NUC |   | IR |
|------------------------------------------------------------------------------------|---|-----|---|----|
| -                                                                                  | + | -   | + |    |
| 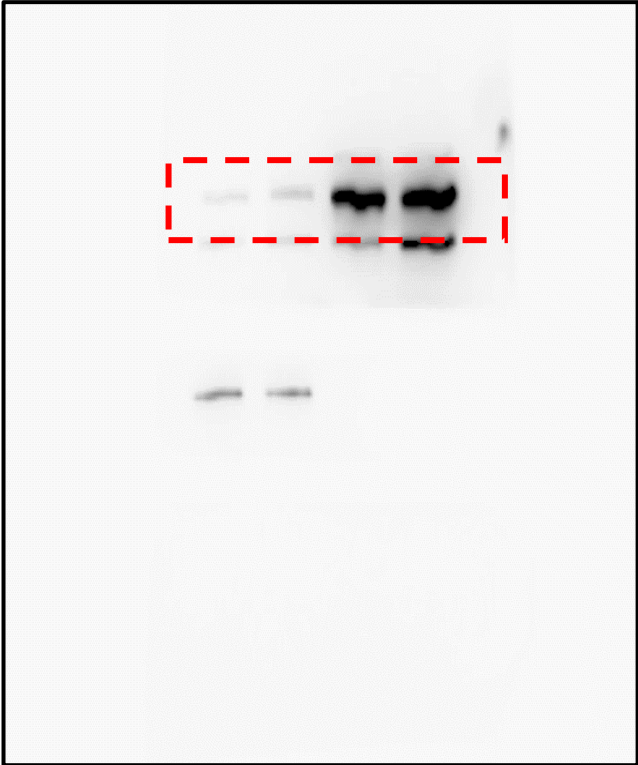 |   |     |   |    |

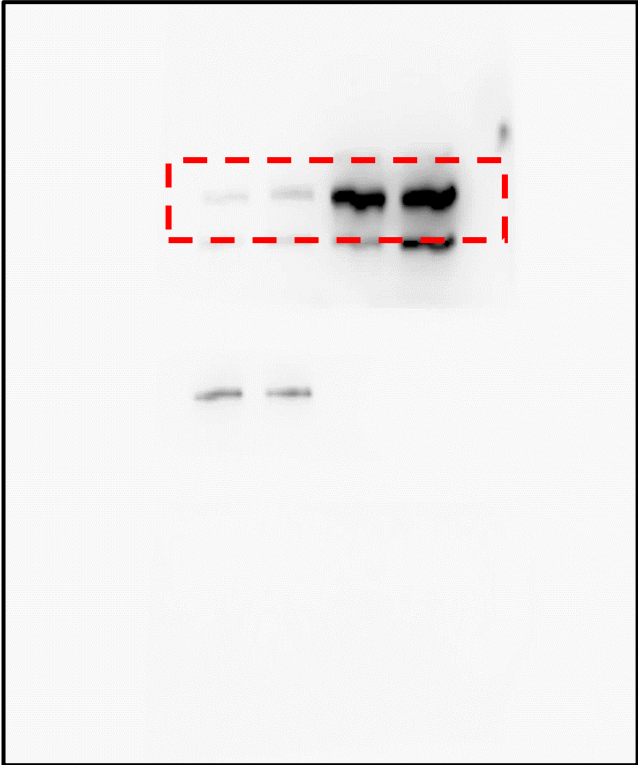

PARP1  
116 KDa

Tubulin  
55 KDa

Tubulin

| CYTO                                                                                 |   | NUC |   | IR |
|--------------------------------------------------------------------------------------|---|-----|---|----|
| -                                                                                    | + | -   | + |    |
| 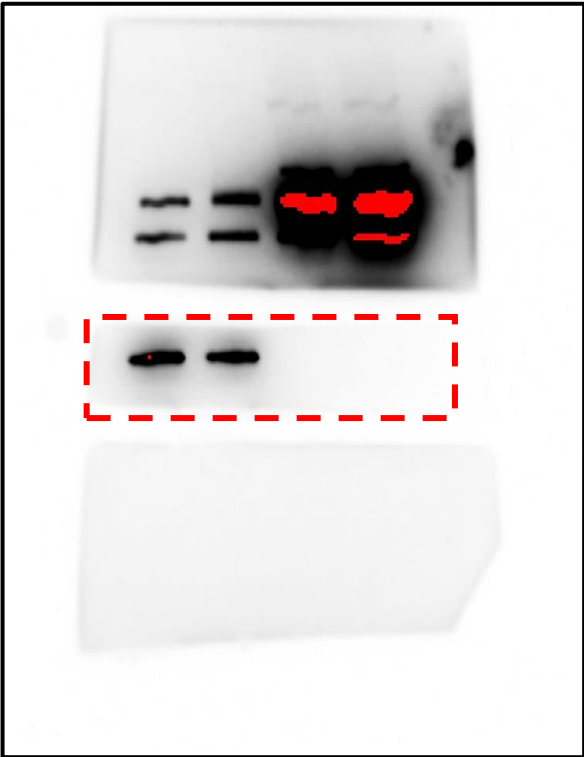 |   |     |   |    |

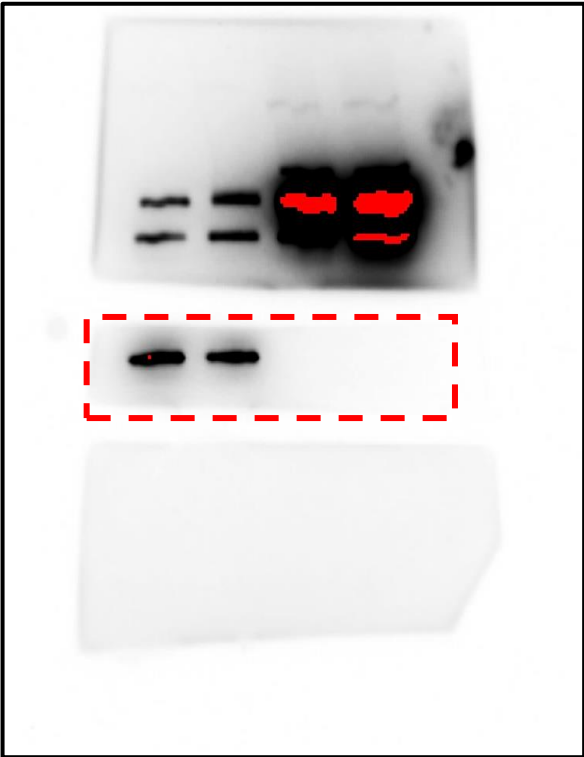

PARP1  
116 KDa

Tubulin  
55 KDa

p21

P21 only

| CYTO                                                                                  |   | NUC |   | IR |
|---------------------------------------------------------------------------------------|---|-----|---|----|
| -                                                                                     | + | -   | + |    |
| 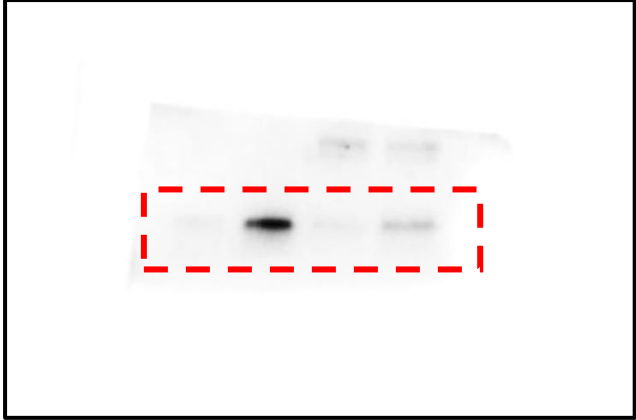 |   |     |   |    |

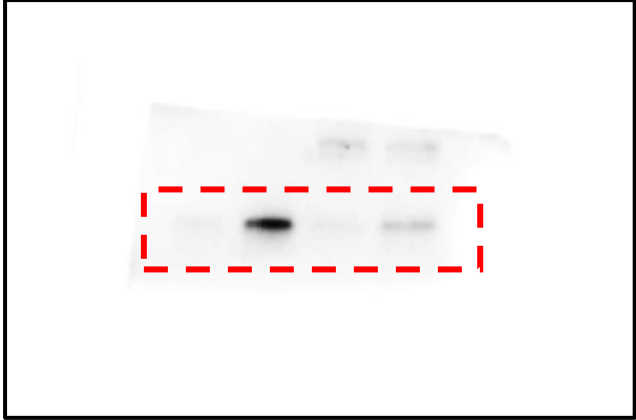

p21  
21 KDa
