# Supplementary material for: Pleiotropic effects of BAFF on the senescence-associated secretome and growth arrest
Source: eLife journal article supplement (doi:10.7554/elife.84238), 2023-03-27
Supplement: fig3-data2 [file elife-84238-fig3-data2-v1.zip]

## Sheet: Original data-Summary
Accession	GenSymbol	Protein names	Function [CC]	Gene ontology (biological process)	Gene ontology (cellular component)	Gene ontology (GO)	Gene ontology (molecular function)	Gene ontology IDs	Intramembrane	Subcellular location [CC]	Transmembrane	Human99Exosomemarkers-ID	Exocarta-Exosomemarkers-Number of times identified	Description	ΣCoverage	Σ# Proteins	Σ# Unique Peptides	Σ# Peptides	Σ# PSMs	Csi: Area	Csi+IR: Area	BAFFsi+IR: Area	Score Csi	Coverage Csi	# Peptides Csi	# PSM Csi	Score Csi+IR	Coverage Csi+IR	# Peptides Csi+IR	# PSM Csi+IR	Score BAFFsi+IR	Coverage BAFFsi+IR	# Peptides BAFFsi+IR	# PSM BAFFsi+IR	# AAs	MW [kDa]	calc. pI
Q8WUM4	PDC6I	Programmed cell death 6-interacting protein (PDCD6-interacting protein) (ALG-2-interacting protein 1) (ALG-2-interacting protein X) (Hp95)	FUNCTION: Multifunctional protein involved in endocytosis, multivesicular body biogenesis, membrane repair, cytokinesis, apoptosis and maintenance of tight junction integrity. Class E VPS protein involved in concentration and sorting of cargo proteins of the multivesicular body (MVB) for incorporation into intralumenal vesicles (ILVs) that are generated by invagination and scission from the limit…	actomyosin contractile ring assembly [GO:0000915]; apoptotic process [GO:0006915]; bicellular tight junction assembly [GO:0070830]; maintenance of epithelial cell apical/basal polarity [GO:0045199]; midbody abscission [GO:0061952]; mitotic cytokinesis [GO:0000281]; multivesicular body assembly [GO:0036258]; positive regulation of exosomal secretion [GO:1903543]; positive regulation of extracellul…	actomyosin [GO:0042641]; bicellular tight junction [GO:0005923]; cell [GO:0005623]; cytosol [GO:0005829]; endoplasmic reticulum exit site [GO:0070971]; extracellular exosome [GO:0070062]; extracellular vesicle [GO:1903561]; Flemming body [GO:0090543]; focal adhesion [GO:0005925]; immunological synapse [GO:0001772]; intracellular membrane-bounded organelle [GO:0043231]; melanosome [GO:0042470]; me…	actomyosin [GO:0042641]; bicellular tight junction [GO:0005923]; cell [GO:0005623]; cytosol [GO:0005829]; endoplasmic reticulum exit site [GO:0070971]; extracellular exosome [GO:0070062]; extracellular vesicle [GO:1903561]; Flemming body [GO:0090543]; focal adhesion [GO:0005925]; immunological synapse [GO:0001772]; intracellular membrane-bounded organelle [GO:0043231]; melanosome [GO:0042470]; me…	calcium-dependent protein binding [GO:0048306]; proteinase activated receptor binding [GO:0031871]; protein homodimerization activity [GO:0042803]	GO:0000281; GO:0000915; GO:0001772; GO:0005623; GO:0005815; GO:0005829; GO:0005923; GO:0005925; GO:0006915; GO:0010824; GO:0015031; GO:0016020; GO:0019058; GO:0031871; GO:0036258; GO:0039702; GO:0042470; GO:0042641; GO:0042803; GO:0043231; GO:0045199; GO:0046755; GO:0048306; GO:0051260; GO:0061952; GO:0070062; GO:0070830; GO:0070971; GO:0090543; GO:0090559; GO:0090611; GO:1903543; GO:1903551; GO:…		SUBCELLULAR LOCATION: Cytoplasm, cytosol {ECO:0000250|UniProtKB:Q9QZA2}. Melanosome {ECO:0000269|PubMed:17081065}. Cytoplasm, cytoskeleton, microtubule organizing center, centrosome {ECO:0000269|PubMed:17556548, ECO:0000269|PubMed:17853893}. Secreted, extracellular exosome {ECO:0000269|PubMed:22660413}. Cell junction, tight junction {ECO:0000250|UniProtKB:Q9WU78}. Midbody, Midbody ring {ECO:00002…		2	96	Programmed cell death 6-interacting protein OS=Homo sapiens OX=9606 GN=PDCD6IP PE=1 SV=1 - [PDC6I_HUMAN]	44.59	1	29	29	108	1.67588e+08	1.3857e+08	9.83061e+07	126.272	38.02	23	41	115.614	37.21	22	38	94.3493	35.14	20	29	868	95.9631	6.52197
P11142	HSP7C	Heat shock cognate 71 kDa protein (Heat shock 70 kDa protein 8) (Lipopolysaccharide-associated protein 1) (LAP-1) (LPS-associated protein 1)	FUNCTION: Molecular chaperone implicated in a wide variety of cellular processes, including protection of the proteome from stress, folding and transport of newly synthesized polypeptides, activation of proteolysis of misfolded proteins and the formation and dissociation of protein complexes. Plays a pivotal role in the protein quality control system, ensuring the correct folding of proteins, the…	ATP metabolic process [GO:0046034]; axo-dendritic transport [GO:0008088]; cellular response to starvation [GO:0009267]; cellular response to unfolded protein [GO:0034620]; chaperone cofactor-dependent protein refolding [GO:0051085]; chaperone-mediated autophagy [GO:0061684]; chaperone-mediated autophagy translocation complex disassembly [GO:1904764]; chaperone-mediated protein transport involved …	autophagosome [GO:0005776]; axon [GO:0030424]; blood microparticle [GO:0072562]; chaperone complex [GO:0101031]; clathrin-sculpted gamma-aminobutyric acid transport vesicle membrane [GO:0061202]; cytoplasm [GO:0005737]; cytosol [GO:0005829]; dendrite [GO:0030425]; extracellular exosome [GO:0070062]; extracellular region [GO:0005576]; extracellular space [GO:0005615]; ficolin-1-rich granule lumen …	autophagosome [GO:0005776]; axon [GO:0030424]; blood microparticle [GO:0072562]; chaperone complex [GO:0101031]; clathrin-sculpted gamma-aminobutyric acid transport vesicle membrane [GO:0061202]; cytoplasm [GO:0005737]; cytosol [GO:0005829]; dendrite [GO:0030425]; extracellular exosome [GO:0070062]; extracellular region [GO:0005576]; extracellular space [GO:0005615]; ficolin-1-rich granule lumen …	ATPase activity [GO:0016887]; ATPase activity, coupled [GO:0042623]; ATP binding [GO:0005524]; C3HC4-type RING finger domain binding [GO:0055131]; cadherin binding [GO:0045296]; chaperone binding [GO:0051087]; clathrin-uncoating ATPase activity [GO:1990833]; enzyme binding [GO:0019899]; G protein-coupled receptor binding [GO:0001664]; heat shock protein binding [GO:0031072]; MHC class II protein …	GO:0000398; GO:0000974; GO:0001664; GO:0001786; GO:0003723; GO:0005524; GO:0005576; GO:0005615; GO:0005634; GO:0005654; GO:0005681; GO:0005730; GO:0005737; GO:0005764; GO:0005765; GO:0005770; GO:0005776; GO:0005829; GO:0005886; GO:0005925; GO:0006457; GO:0006986; GO:0007269; GO:0008088; GO:0009267; GO:0016020; GO:0016032; GO:0016192; GO:0016887; GO:0019221; GO:0019899; GO:0023026; GO:0030424; GO:…		SUBCELLULAR LOCATION: Cytoplasm. Melanosome. Nucleus, nucleolus. Cell membrane. Note=Localized in cytoplasmic mRNP granules containing untranslated mRNAs. Translocates rapidly from the cytoplasm to the nuclei, and especially to the nucleoli, upon heat shock.		3	96	Heat shock cognate 71 kDa protein OS=Homo sapiens OX=9606 GN=HSPA8 PE=1 SV=1 - [HSP7C_HUMAN]	69.66	2	28	36	506	6.86395e+09	5.46395e+09	4.60465e+09	633.603	66.87	32	166	601.135	58.82	32	160	652.194	57.74	32	180	646	70.8542	5.51611
P04406	G3P	Glyceraldehyde-3-phosphate dehydrogenase (GAPDH) (EC 1.2.1.12) (Peptidyl-cysteine S-nitrosylase GAPDH) (EC 2.6.99.-)	FUNCTION: Has both glyceraldehyde-3-phosphate dehydrogenase and nitrosylase activities, thereby playing a role in glycolysis and nuclear functions, respectively. Participates in nuclear events including transcription, RNA transport, DNA replication and apoptosis. Nuclear functions are probably due to the nitrosylase activity that mediates cysteine S-nitrosylation of nuclear target proteins such a…	antimicrobial humoral immune response mediated by antimicrobial peptide [GO:0061844]; canonical glycolysis [GO:0061621]; cellular response to interferon-gamma [GO:0071346]; defense response to fungus [GO:0050832]; gluconeogenesis [GO:0006094]; glycolytic process [GO:0006096]; killing by host of symbiont cells [GO:0051873]; killing of cells of other organism [GO:0031640]; microtubule cytoskeleton …	cytoplasm [GO:0005737]; cytosol [GO:0005829]; extracellular exosome [GO:0070062]; GAIT complex [GO:0097452]; intracellular membrane-bounded organelle [GO:0043231]; lipid droplet [GO:0005811]; membrane [GO:0016020]; microtubule cytoskeleton [GO:0015630]; nuclear membrane [GO:0031965]; nucleus [GO:0005634]; perinuclear region of cytoplasm [GO:0048471]; plasma membrane [GO:0005886]; ribonucleoprotei…	cytoplasm [GO:0005737]; cytosol [GO:0005829]; extracellular exosome [GO:0070062]; GAIT complex [GO:0097452]; intracellular membrane-bounded organelle [GO:0043231]; lipid droplet [GO:0005811]; membrane [GO:0016020]; microtubule cytoskeleton [GO:0015630]; nuclear membrane [GO:0031965]; nucleus [GO:0005634]; perinuclear region of cytoplasm [GO:0048471]; plasma membrane [GO:0005886]; ribonucleoprotei…	aspartic-type endopeptidase inhibitor activity [GO:0019828]; disordered domain specific binding [GO:0097718]; glyceraldehyde-3-phosphate dehydrogenase (NAD+) (phosphorylating) activity [GO:0004365]; identical protein binding [GO:0042802]; microtubule binding [GO:0008017]; NAD binding [GO:0051287]; NADP binding [GO:0050661]; peptidyl-cysteine S-nitrosylase activity [GO:0035605]	GO:0000226; GO:0004365; GO:0005634; GO:0005737; GO:0005811; GO:0005829; GO:0005886; GO:0006094; GO:0006096; GO:0008017; GO:0010951; GO:0015630; GO:0016020; GO:0016241; GO:0017148; GO:0019828; GO:0031640; GO:0031965; GO:0031982; GO:0035605; GO:0035606; GO:0042802; GO:0043231; GO:0048471; GO:0050661; GO:0050715; GO:0050821; GO:0050832; GO:0051287; GO:0051402; GO:0051873; GO:0052501; GO:0061621; GO:…		SUBCELLULAR LOCATION: Cytoplasm, cytosol {ECO:0000269|PubMed:12829261}. Nucleus {ECO:0000250}. Cytoplasm, perinuclear region {ECO:0000269|PubMed:12829261}. Membrane {ECO:0000269|PubMed:12829261}. Cytoplasm, cytoskeleton {ECO:0000250}. Note=Translocates to the nucleus following S-nitrosylation and interaction with SIAH1, which contains a nuclear localization signal (By similarity). Postnuclear and…		4	95	Glyceraldehyde-3-phosphate dehydrogenase OS=Homo sapiens OX=9606 GN=GAPDH PE=1 SV=3 - [G3P_HUMAN]	64.48	2	21	21	314	5471469136	4.82701e+09	3.72118e+09	434.48	60.6	16	116	377.395	55.22	17	95	396.167	56.12	20	103	335	36.0304	8.45557
P60709	ACTB	Actin, cytoplasmic 1 (Beta-actin) [Cleaved into: Actin, cytoplasmic 1, N-terminally processed]	FUNCTION: Actin is a highly conserved protein that polymerizes to produce filaments that form cross-linked networks in the cytoplasm of cells (PubMed:29581253). Actin exists in both monomeric (G-actin) and polymeric (F-actin) forms, both forms playing key functions, such as cell motility and contraction (PubMed:29581253). In addition to their role in the cytoplasmic cytoskeleton, G- and F-actin a…	adherens junction assembly [GO:0034333]; apical protein localization [GO:0045176]; ATP-dependent chromatin remodeling [GO:0043044]; axonogenesis [GO:0007409]; cell junction assembly [GO:0034329]; cell motility [GO:0048870]; cellular response to cytochalasin B [GO:0072749]; ephrin receptor signaling pathway [GO:0048013]; establishment or maintenance of cell polarity [GO:0007163]; Fc-gamma receptor…	actin cytoskeleton [GO:0015629]; actin filament [GO:0005884]; adherens junction [GO:0005912]; apical junction complex [GO:0043296]; axon [GO:0030424]; blood microparticle [GO:0072562]; calyx of Held [GO:0044305]; cell-cell junction [GO:0005911]; cortical cytoskeleton [GO:0030863]; cytoplasm [GO:0005737]; cytoplasmic ribonucleoprotein granule [GO:0036464]; cytoskeleton [GO:0005856]; cytosol [GO:00…	actin cytoskeleton [GO:0015629]; actin filament [GO:0005884]; adherens junction [GO:0005912]; apical junction complex [GO:0043296]; axon [GO:0030424]; blood microparticle [GO:0072562]; calyx of Held [GO:0044305]; cell-cell junction [GO:0005911]; cortical cytoskeleton [GO:0030863]; cytoplasm [GO:0005737]; cytoplasmic ribonucleoprotein granule [GO:0036464]; cytoskeleton [GO:0005856]; cytosol [GO:00…	ATP binding [GO:0005524]; identical protein binding [GO:0042802]; kinesin binding [GO:0019894]; nitric-oxide synthase binding [GO:0050998]; protein kinase binding [GO:0019901]; structural constituent of cytoskeleton [GO:0005200]; structural constituent of postsynaptic actin cytoskeleton [GO:0098973]; Tat protein binding [GO:0030957]; tau protein binding [GO:0048156]	GO:0000079; GO:0000790; GO:0001738; GO:0001895; GO:0005200; GO:0005524; GO:0005615; GO:0005634; GO:0005654; GO:0005737; GO:0005829; GO:0005856; GO:0005884; GO:0005886; GO:0005911; GO:0005912; GO:0005925; GO:0007163; GO:0007409; GO:0015629; GO:0016020; GO:0016579; GO:0019894; GO:0019901; GO:0021762; GO:0022898; GO:0030027; GO:0030424; GO:0030863; GO:0030957; GO:0031982; GO:0032091; GO:0032991; GO:…		SUBCELLULAR LOCATION: Cytoplasm, cytoskeleton {ECO:0000269|PubMed:11687588, ECO:0000269|PubMed:17289661}. Nucleus {ECO:0000269|PubMed:11687588, ECO:0000269|PubMed:29925947}. Note=Localized in cytoplasmic mRNP granules containing untranslated mRNAs. {ECO:0000269|PubMed:17289661}.		5	93	Actin, cytoplasmic 1 OS=Homo sapiens OX=9606 GN=ACTB PE=1 SV=1 - [ACTB_HUMAN]	85.6	3	15	38	2078	7.05145e+10	62974424225	6.12733e+10	2576.31	80	31	664	2682.92	70.67	31	709	2544	76.53	32	705	375	41.7097	5.47803
P07355	ANXA2	Annexin A2 (Annexin II) (Annexin-2) (Calpactin I heavy chain) (Calpactin-1 heavy chain) (Chromobindin-8) (Lipocortin II) (Placental anticoagulant protein IV) (PAP-IV) (Protein I) (p36)	FUNCTION: Calcium-regulated membrane-binding protein whose affinity for calcium is greatly enhanced by anionic phospholipids. It binds two calcium ions with high affinity. May be involved in heat-stress response. Inhibits PCSK9-enhanced LDLR degradation, probably reduces PCSK9 protein levels via a translational mechanism but also competes with LDLR for binding with PCSK9 (PubMed:18799458, PubMed:…	angiogenesis [GO:0001525]; biomineral tissue development [GO:0031214]; body fluid secretion [GO:0007589]; catabolism by host of symbiont protein [GO:0052362]; collagen fibril organization [GO:0030199]; endocardial cell differentiation [GO:0060956]; fibrinolysis [GO:0042730]; growth plate cartilage development [GO:0003417]; interleukin-12-mediated signaling pathway [GO:0035722]; membrane raft asse…	adherens junction [GO:0005912]; AnxA2-p11 complex [GO:1990665]; azurophil granule lumen [GO:0035578]; basement membrane [GO:0005604]; basolateral plasma membrane [GO:0016323]; cell [GO:0005623]; cell cortex [GO:0005938]; cell surface [GO:0009986]; collagen-containing extracellular matrix [GO:0062023]; cytoplasm [GO:0005737]; cytosol [GO:0005829]; early endosome [GO:0005769]; endosome [GO:0005768]…	adherens junction [GO:0005912]; AnxA2-p11 complex [GO:1990665]; azurophil granule lumen [GO:0035578]; basement membrane [GO:0005604]; basolateral plasma membrane [GO:0016323]; cell [GO:0005623]; cell cortex [GO:0005938]; cell surface [GO:0009986]; collagen-containing extracellular matrix [GO:0062023]; cytoplasm [GO:0005737]; cytosol [GO:0005829]; early endosome [GO:0005769]; endosome [GO:0005768]…	bone sialoprotein binding [GO:0044730]; cadherin binding involved in cell-cell adhesion [GO:0098641]; calcium channel activity [GO:0005262]; calcium-dependent phospholipid binding [GO:0005544]; calcium-dependent protein binding [GO:0048306]; calcium ion binding [GO:0005509]; cytoskeletal protein binding [GO:0008092]; identical protein binding [GO:0042802]; molecular function regulator [GO:0098772…	GO:0001525; GO:0001726; GO:0001765; GO:0001786; GO:0001921; GO:0001934; GO:0002020; GO:0003417; GO:0003723; GO:0005262; GO:0005509; GO:0005544; GO:0005546; GO:0005576; GO:0005604; GO:0005615; GO:0005623; GO:0005634; GO:0005737; GO:0005765; GO:0005768; GO:0005769; GO:0005811; GO:0005829; GO:0005886; GO:0005912; GO:0005938; GO:0006900; GO:0007589; GO:0008092; GO:0009986; GO:0010755; GO:0016020; GO:…		SUBCELLULAR LOCATION: Secreted, extracellular space, extracellular matrix, basement membrane {ECO:0000269|PubMed:17081065}. Melanosome {ECO:0000269|PubMed:17081065}. Note=In the lamina beneath the plasma membrane. Identified by mass spectrometry in melanosome fractions from stage I to stage IV. Translocated from the cytoplasm to the cell surface through a Golgi-independent mechanism.		6	83	Annexin A2 OS=Homo sapiens OX=9606 GN=ANXA2 PE=1 SV=2 - [ANXA2_HUMAN]	73.16	2	29	29	222	1.39775e+09	1.59565e+09	1.42496e+09	233.361	71.68	27	74	245.336	71.09	27	76	225.056	71.09	25	72	339	38.5798	7.75244
P08962	CD63	CD63 antigen (Granulophysin) (Lysosomal-associated membrane protein 3) (LAMP-3) (Melanoma-associated antigen ME491) (OMA81H) (Ocular melanoma-associated antigen) (Tetraspanin-30) (Tspan-30) (CD antigen CD63)	FUNCTION: Functions as cell surface receptor for TIMP1 and plays a role in the activation of cellular signaling cascades. Plays a role in the activation of ITGB1 and integrin signaling, leading to the activation of AKT, FAK/PTK2 and MAP kinases. Promotes cell survival, reorganization of the actin cytoskeleton, cell adhesion, spreading and migration, via its role in the activation of AKT and FAK/P…	cell-matrix adhesion [GO:0007160]; cell migration [GO:0016477]; cellular protein localization [GO:0034613]; endosome to melanosome transport [GO:0035646]; neutrophil degranulation [GO:0043312]; pigment granule maturation [GO:0048757]; platelet degranulation [GO:0002576]; positive regulation of integrin-mediated signaling pathway [GO:2001046]; positive regulation of receptor internalization [GO:00…	azurophil granule membrane [GO:0035577]; cell surface [GO:0009986]; endosome lumen [GO:0031904]; endosome membrane [GO:0010008]; extracellular exosome [GO:0070062]; extracellular space [GO:0005615]; integral component of plasma membrane [GO:0005887]; intrinsic component of plasma membrane [GO:0031226]; late endosome membrane [GO:0031902]; lysosomal membrane [GO:0005765]; melanosome [GO:0042470]; …	azurophil granule membrane [GO:0035577]; cell surface [GO:0009986]; endosome lumen [GO:0031904]; endosome membrane [GO:0010008]; extracellular exosome [GO:0070062]; extracellular space [GO:0005615]; integral component of plasma membrane [GO:0005887]; intrinsic component of plasma membrane [GO:0031226]; late endosome membrane [GO:0031902]; lysosomal membrane [GO:0005765]; melanosome [GO:0042470]; …		GO:0002092; GO:0002576; GO:0005615; GO:0005765; GO:0005886; GO:0005887; GO:0007160; GO:0009986; GO:0010008; GO:0015031; GO:0016477; GO:0031088; GO:0031226; GO:0031902; GO:0031904; GO:0032585; GO:0034613; GO:0035577; GO:0035646; GO:0042470; GO:0043312; GO:0048757; GO:0070062; GO:0097487; GO:1900746; GO:1901379; GO:2001046		SUBCELLULAR LOCATION: Cell membrane {ECO:0000269|PubMed:15351990, ECO:0000269|PubMed:19640571, ECO:0000269|PubMed:23632027}; Multi-pass membrane protein {ECO:0000255}. Lysosome membrane {ECO:0000269|PubMed:17897319, ECO:0000269|PubMed:19640571, ECO:0000269|PubMed:1993697, ECO:0000269|PubMed:22431521, ECO:0000269|PubMed:23632027}; Multi-pass membrane protein {ECO:0000255}. Late endosome membrane {…	TRANSMEM 12..32; /note="Helical"; /evidence="ECO:0000255"; TRANSMEM 52..72; /note="Helical"; /evidence="ECO:0000255"; TRANSMEM 82..102; /note="Helical"; /evidence="ECO:0000255"; TRANSMEM 204..224; /note="Helical"; /evidence="ECO:0000255"	7	82	CD63 antigen OS=Homo sapiens OX=9606 GN=CD63 PE=1 SV=2 - [CD63_HUMAN]	9.24	1	3	3	10	1.30306e+08	361299688	1.47224e+08	6.59117	9.24	3	4	4.41053	4.2	1	2	5.02207	9.24	3	4	238	25.6191	7.81104
O00560	SDCB1	Syntenin-1 (Melanoma differentiation-associated protein 9) (MDA-9) (Pro-TGF-alpha cytoplasmic domain-interacting protein 18) (TACIP18) (Scaffold protein Pbp1) (Syndecan-binding protein 1)	FUNCTION: Multifunctional adapter protein involved in diverse array of functions including trafficking of transmembrane proteins, neuro and immunomodulation, exosome biogenesis, and tumorigenesis (PubMed:26291527). Positively regulates TGFB1-mediated SMAD2/3 activation and TGFB1-induced epithelial-to-mesenchymal transition (EMT) and cell migration in various cell types. May increase TGFB1 signali…	actin cytoskeleton organization [GO:0030036]; chemical synaptic transmission [GO:0007268]; ephrin receptor signaling pathway [GO:0048013]; intracellular signal transduction [GO:0035556]; negative regulation of proteasomal ubiquitin-dependent protein catabolic process [GO:0032435]; negative regulation of receptor internalization [GO:0002091]; neutrophil degranulation [GO:0043312]; positive regulat…	adherens junction [GO:0005912]; azurophil granule lumen [GO:0035578]; blood microparticle [GO:0072562]; cytoplasm [GO:0005737]; cytoskeleton [GO:0005856]; cytosol [GO:0005829]; endoplasmic reticulum membrane [GO:0005789]; extracellular exosome [GO:0070062]; extracellular region [GO:0005576]; extracellular space [GO:0005615]; extracellular vesicle [GO:1903561]; focal adhesion [GO:0005925]; interle…	adherens junction [GO:0005912]; azurophil granule lumen [GO:0035578]; blood microparticle [GO:0072562]; cytoplasm [GO:0005737]; cytoskeleton [GO:0005856]; cytosol [GO:0005829]; endoplasmic reticulum membrane [GO:0005789]; extracellular exosome [GO:0070062]; extracellular region [GO:0005576]; extracellular space [GO:0005615]; extracellular vesicle [GO:1903561]; focal adhesion [GO:0005925]; interle…	cytoskeletal adaptor activity [GO:0008093]; frizzled binding [GO:0005109]; identical protein binding [GO:0042802]; interleukin-5 receptor binding [GO:0005137]; phosphatidylinositol-4,5-bisphosphate binding [GO:0005546]; protein heterodimerization activity [GO:0046982]; protein N-terminus binding [GO:0047485]; syndecan binding [GO:0045545]	GO:0002091; GO:0005109; GO:0005137; GO:0005546; GO:0005576; GO:0005615; GO:0005634; GO:0005654; GO:0005737; GO:0005789; GO:0005829; GO:0005856; GO:0005886; GO:0005895; GO:0005912; GO:0005925; GO:0006612; GO:0006930; GO:0007268; GO:0007346; GO:0008093; GO:0008284; GO:0010718; GO:0010862; GO:0016020; GO:0030036; GO:0030307; GO:0030335; GO:0030511; GO:0031965; GO:0032435; GO:0035556; GO:0035578; GO:…		SUBCELLULAR LOCATION: Cell junction, focal adhesion {ECO:0000269|PubMed:11179419}. Cell junction, adherens junction {ECO:0000269|PubMed:11179419}. Cell membrane {ECO:0000269|PubMed:11179419, ECO:0000269|PubMed:25893292, ECO:0000269|PubMed:27386966}; Peripheral membrane protein {ECO:0000269|PubMed:11179419, ECO:0000269|PubMed:27386966}. Endoplasmic reticulum membrane {ECO:0000269|PubMed:17081065};…		8	78	Syntenin-1 OS=Homo sapiens OX=9606 GN=SDCBP PE=1 SV=1 - [SDCB1_HUMAN]	33.89	1	5	5	27	9.46109e+07	8.32249e+07	7.19646e+07	42.8257	33.89	5	13	25.9026	27.52	4	8	17.2141	25.5	3	6	298	32.4239	7.53271
P06733	ENOA	Alpha-enolase (EC 4.2.1.11) (2-phospho-D-glycerate hydro-lyase) (C-myc promoter-binding protein) (Enolase 1) (MBP-1) (MPB-1) (Non-neural enolase) (NNE) (Phosphopyruvate hydratase) (Plasminogen-binding protein)	FUNCTION: Glycolytic enzyme the catalyzes the conversion of 2-phosphoglycerate to phosphoenolpyruvate (PubMed:29775581, PubMed:1369209). In addition to glycolysis, involved in various processes such as growth control, hypoxia tolerance and allergic responses (PubMed:2005901, PubMed:10802057, PubMed:12666133, PubMed:29775581). May also function in the intravascular and pericellular fibrinolytic sy…	canonical glycolysis [GO:0061621]; gluconeogenesis [GO:0006094]; negative regulation of cell growth [GO:0030308]; negative regulation of hypoxia-induced intrinsic apoptotic signaling pathway [GO:1903298]; negative regulation of transcription, DNA-templated [GO:0045892]; negative regulation of transcription by RNA polymerase II [GO:0000122]; positive regulation of ATP biosynthetic process [GO:2001…	cell cortex region [GO:0099738]; cell surface [GO:0009986]; cytoplasm [GO:0005737]; cytosol [GO:0005829]; extracellular exosome [GO:0070062]; extracellular space [GO:0005615]; M band [GO:0031430]; membrane [GO:0016020]; nucleus [GO:0005634]; phosphopyruvate hydratase complex [GO:0000015]; plasma membrane [GO:0005886]	cell cortex region [GO:0099738]; cell surface [GO:0009986]; cytoplasm [GO:0005737]; cytosol [GO:0005829]; extracellular exosome [GO:0070062]; extracellular space [GO:0005615]; M band [GO:0031430]; membrane [GO:0016020]; nucleus [GO:0005634]; phosphopyruvate hydratase complex [GO:0000015]; plasma membrane [GO:0005886]; cadherin binding [GO:0045296]; DNA-binding transcription repressor activity, RN…	cadherin binding [GO:0045296]; DNA-binding transcription repressor activity, RNA polymerase II-specific [GO:0001227]; GTPase binding [GO:0051020]; magnesium ion binding [GO:0000287]; phosphopyruvate hydratase activity [GO:0004634]; protein homodimerization activity [GO:0042803]; RNA binding [GO:0003723]; RNA polymerase II regulatory region sequence-specific DNA binding [GO:0000977]	GO:0000015; GO:0000122; GO:0000287; GO:0000977; GO:0001227; GO:0003723; GO:0004634; GO:0005615; GO:0005634; GO:0005737; GO:0005829; GO:0005886; GO:0006094; GO:0009615; GO:0009986; GO:0010756; GO:0016020; GO:0030308; GO:0031430; GO:0042803; GO:0045296; GO:0045892; GO:0045933; GO:0051020; GO:0061621; GO:0070062; GO:0099738; GO:1903298; GO:2001171		SUBCELLULAR LOCATION: Cytoplasm {ECO:0000269|PubMed:10802057}. Cell membrane {ECO:0000269|PubMed:10802057}. Cytoplasm, myofibril, sarcomere, M line {ECO:0000269|PubMed:10802057}. Note=Can translocate to the plasma membrane in either the homodimeric (alpha/alpha) or heterodimeric (alpha/gamma) form. ENO1 is localized to the M line.; SUBCELLULAR LOCATION: [Isoform MBP-1]: Nucleus.		9	78	Alpha-enolase OS=Homo sapiens OX=9606 GN=ENO1 PE=1 SV=2 - [ENOA_HUMAN]	76.04	3	33	33	481	7063429981	5.92781e+09	4.8084e+09	633.193	72.12	27	167	589.536	75.35	32	150	625.502	74.19	29	164	434	47.1393	7.38623
P07900	HS90A	Heat shock protein HSP 90-alpha (Heat shock 86 kDa) (HSP 86) (HSP86) (Lipopolysaccharide-associated protein 2) (LAP-2) (LPS-associated protein 2) (Renal carcinoma antigen NY-REN-38)	FUNCTION: Molecular chaperone that promotes the maturation, structural maintenance and proper regulation of specific target proteins involved for instance in cell cycle control and signal transduction. Undergoes a functional cycle that is linked to its ATPase activity which is essential for its chaperone activity. This cycle probably induces conformational changes in the client proteins, thereby …	axon extension [GO:0048675]; cellular response to heat [GO:0034605]; central nervous system neuron axonogenesis [GO:0021955]; chaperone-mediated autophagy [GO:0061684]; chaperone-mediated protein complex assembly [GO:0051131]; ciliary basal body-plasma membrane docking [GO:0097711]; cofactor metabolic process [GO:0051186]; cytokine-mediated signaling pathway [GO:0019221]; ERBB2 signaling pathway …	axonal growth cone [GO:0044295]; cell surface [GO:0009986]; cytoplasm [GO:0005737]; cytosol [GO:0005829]; dendritic growth cone [GO:0044294]; endocytic vesicle lumen [GO:0071682]; extracellular exosome [GO:0070062]; extracellular region [GO:0005576]; ficolin-1-rich granule lumen [GO:1904813]; lysosomal lumen [GO:0043202]; melanosome [GO:0042470]; membrane [GO:0016020]; myelin sheath [GO:0043209];…	axonal growth cone [GO:0044295]; cell surface [GO:0009986]; cytoplasm [GO:0005737]; cytosol [GO:0005829]; dendritic growth cone [GO:0044294]; endocytic vesicle lumen [GO:0071682]; extracellular exosome [GO:0070062]; extracellular region [GO:0005576]; ficolin-1-rich granule lumen [GO:1904813]; lysosomal lumen [GO:0043202]; melanosome [GO:0042470]; membrane [GO:0016020]; myelin sheath [GO:0043209];…	ATPase activity [GO:0016887]; ATPase activity, coupled [GO:0042623]; ATP binding [GO:0005524]; disordered domain specific binding [GO:0097718]; DNA polymerase binding [GO:0070182]; GTPase binding [GO:0051020]; histone deacetylase binding [GO:0042826]; identical protein binding [GO:0042802]; MHC class II protein complex binding [GO:0023026]; nitric-oxide synthase regulator activity [GO:0030235]; p…	GO:0000086; GO:0001934; GO:0003723; GO:0005524; GO:0005576; GO:0005634; GO:0005654; GO:0005737; GO:0005829; GO:0005886; GO:0006457; GO:0006839; GO:0006898; GO:0006986; GO:0007004; GO:0009408; GO:0009409; GO:0009986; GO:0010389; GO:0016020; GO:0016032; GO:0016887; GO:0019221; GO:0021955; GO:0023026; GO:0030010; GO:0030235; GO:0030911; GO:0031396; GO:0031625; GO:0032273; GO:0032991; GO:0033138; GO:…		SUBCELLULAR LOCATION: Nucleus {ECO:0000250|UniProtKB:P07901}. Cytoplasm {ECO:0000250|UniProtKB:P07901}. Melanosome {ECO:0000269|PubMed:17081065}. Cell membrane {ECO:0000269|PubMed:11276205}. Note=Identified by mass spectrometry in melanosome fractions from stage I to stage IV.		10	77	Heat shock protein HSP 90-alpha OS=Homo sapiens OX=9606 GN=HSP90AA1 PE=1 SV=5 - [HS90A_HUMAN]	68.58	4	34	50	515	8.29006e+09	9.3206e+09	6539155322	587.589	64.34	43	172	607.469	63.39	45	169	625.376	61.61	46	174	732	84.6067	5.021
P14618	KPYM	Pyruvate kinase PKM (EC 2.7.1.40) (Cytosolic thyroid hormone-binding protein) (CTHBP) (Opa-interacting protein 3) (OIP-3) (Pyruvate kinase 2/3) (Pyruvate kinase muscle isozyme) (Thyroid hormone-binding protein 1) (THBP1) (Tumor M2-PK) (p58)	FUNCTION: Glycolytic enzyme that catalyzes the transfer of a phosphoryl group from phosphoenolpyruvate (PEP) to ADP, generating ATP. Stimulates POU5F1-mediated transcriptional activation. Plays a general role in caspase independent cell death of tumor cells. The ratio between the highly active tetrameric form and nearly inactive dimeric form determines whether glucose carbons are channeled to bio…	animal organ regeneration [GO:0031100]; ATP biosynthetic process [GO:0006754]; canonical glycolysis [GO:0061621]; cellular response to insulin stimulus [GO:0032869]; glycolytic process [GO:0006096]; liver development [GO:0001889]; neutrophil degranulation [GO:0043312]; positive regulation of sprouting angiogenesis [GO:1903672]; programmed cell death [GO:0012501]; pyruvate biosynthetic process [GO…	cilium [GO:0005929]; collagen-containing extracellular matrix [GO:0062023]; cytoplasm [GO:0005737]; cytosol [GO:0005829]; extracellular exosome [GO:0070062]; extracellular region [GO:0005576]; extracellular vesicle [GO:1903561]; ficolin-1-rich granule lumen [GO:1904813]; mitochondrion [GO:0005739]; nucleus [GO:0005634]; pyruvate kinase complex [GO:1902912]; secretory granule lumen [GO:0034774]; v…	cilium [GO:0005929]; collagen-containing extracellular matrix [GO:0062023]; cytoplasm [GO:0005737]; cytosol [GO:0005829]; extracellular exosome [GO:0070062]; extracellular region [GO:0005576]; extracellular vesicle [GO:1903561]; ficolin-1-rich granule lumen [GO:1904813]; mitochondrion [GO:0005739]; nucleus [GO:0005634]; pyruvate kinase complex [GO:1902912]; secretory granule lumen [GO:0034774]; v…	ADP binding [GO:0043531]; ATP binding [GO:0005524]; cadherin binding [GO:0045296]; identical protein binding [GO:0042802]; kinase activity [GO:0016301]; magnesium ion binding [GO:0000287]; MHC class II protein complex binding [GO:0023026]; potassium ion binding [GO:0030955]; pyruvate kinase activity [GO:0004743]; RNA binding [GO:0003723]; thyroid hormone binding [GO:0070324]	GO:0000287; GO:0001666; GO:0001889; GO:0003723; GO:0004743; GO:0005524; GO:0005576; GO:0005634; GO:0005737; GO:0005739; GO:0005829; GO:0005929; GO:0006096; GO:0006754; GO:0007584; GO:0009629; GO:0012501; GO:0014870; GO:0016301; GO:0023026; GO:0030955; GO:0031100; GO:0031982; GO:0032869; GO:0034774; GO:0042802; GO:0042866; GO:0043312; GO:0043403; GO:0043531; GO:0045296; GO:0061621; GO:0062023; GO:…		SUBCELLULAR LOCATION: Cytoplasm {ECO:0000269|PubMed:25263439}. Nucleus. Note=Translocates to the nucleus in response to different apoptotic stimuli. Nuclear translocation is sufficient to induce cell death that is caspase independent, isoform-specific and independent of its enzymatic activity.		12	72	Pyruvate kinase PKM OS=Homo sapiens OX=9606 GN=PKM PE=1 SV=4 - [KPYM_HUMAN]	69.49	2	35	35	387	2.6964e+09	3.10322e+09	2.42757e+09	480.991	59.51	29	116	506.164	60.83	30	125	560.235	69.49	35	146	531	57.9	7.84033
P00338	LDHA	L-lactate dehydrogenase A chain (LDH-A) (EC 1.1.1.27) (Cell proliferation-inducing gene 19 protein) (LDH muscle subunit) (LDH-M) (Renal carcinoma antigen NY-REN-59)		glycolytic process [GO:0006096]; lactate metabolic process [GO:0006089]; NAD metabolic process [GO:0019674]; positive regulation of apoptotic process [GO:0043065]; post-embryonic animal organ development [GO:0048569]; pyruvate metabolic process [GO:0006090]; response to cAMP [GO:0051591]; response to estrogen [GO:0043627]; response to glucose [GO:0009749]; response to hydrogen peroxide [GO:004254…	cytosol [GO:0005829]; extracellular exosome [GO:0070062]; membrane [GO:0016020]; nucleus [GO:0005634]	cytosol [GO:0005829]; extracellular exosome [GO:0070062]; membrane [GO:0016020]; nucleus [GO:0005634]; cadherin binding [GO:0045296]; identical protein binding [GO:0042802]; kinase binding [GO:0019900]; L-lactate dehydrogenase activity [GO:0004459]; NAD binding [GO:0051287]; glycolytic process [GO:0006096]; lactate metabolic process [GO:0006089]; NAD metabolic process [GO:0019674]; positive regul…	cadherin binding [GO:0045296]; identical protein binding [GO:0042802]; kinase binding [GO:0019900]; L-lactate dehydrogenase activity [GO:0004459]; NAD binding [GO:0051287]	GO:0001666; GO:0004459; GO:0005634; GO:0005829; GO:0006089; GO:0006090; GO:0006096; GO:0007584; GO:0009749; GO:0016020; GO:0019674; GO:0019900; GO:0021762; GO:0042542; GO:0042802; GO:0043065; GO:0043627; GO:0045296; GO:0048569; GO:0051287; GO:0051591; GO:0070062		SUBCELLULAR LOCATION: Cytoplasm.		13	72	L-lactate dehydrogenase A chain OS=Homo sapiens OX=9606 GN=LDHA PE=1 SV=2 - [LDHA_HUMAN]	68.98	4	22	24	173	3.35331e+09	2.76983e+09	2.09737e+09	164.489	66.57	20	59	164.427	58.43	21	59	154.132	61.14	22	55	332	36.6654	8.26514
P68104	EF1A1	Elongation factor 1-alpha 1 (EF-1-alpha-1) (Elongation factor Tu) (EF-Tu) (Eukaryotic elongation factor 1 A-1) (eEF1A-1) (Leukocyte receptor cluster member 7)	FUNCTION: This protein promotes the GTP-dependent binding of aminoacyl-tRNA to the A-site of ribosomes during protein biosynthesis. With PARP1 and TXK, forms a complex that acts as a T helper 1 (Th1) cell-specific transcription factor and binds the promoter of IFN-gamma to directly regulate its transcription, and is thus involved importantly in Th1 cytokine production. {ECO:0000269|PubMed:1717797…	cellular response to epidermal growth factor stimulus [GO:0071364]; neutrophil degranulation [GO:0043312]; regulation of chaperone-mediated autophagy [GO:1904714]; regulation of D-erythro-sphingosine kinase activity [GO:1900022]; translation [GO:0006412]; translational elongation [GO:0006414]	cortical actin cytoskeleton [GO:0030864]; cytoplasm [GO:0005737]; cytoplasmic side of lysosomal membrane [GO:0098574]; cytosol [GO:0005829]; eukaryotic translation elongation factor 1 complex [GO:0005853]; extracellular exosome [GO:0070062]; extracellular region [GO:0005576]; extracellular space [GO:0005615]; ficolin-1-rich granule lumen [GO:1904813]; membrane [GO:0016020]; nucleolus [GO:0005730]…	cortical actin cytoskeleton [GO:0030864]; cytoplasm [GO:0005737]; cytoplasmic side of lysosomal membrane [GO:0098574]; cytosol [GO:0005829]; eukaryotic translation elongation factor 1 complex [GO:0005853]; extracellular exosome [GO:0070062]; extracellular region [GO:0005576]; extracellular space [GO:0005615]; ficolin-1-rich granule lumen [GO:1904813]; membrane [GO:0016020]; nucleolus [GO:0005730]…	GTPase activity [GO:0003924]; GTP binding [GO:0005525]; kinase binding [GO:0019900]; protein kinase binding [GO:0019901]; RNA binding [GO:0003723]; translation elongation factor activity [GO:0003746]; tRNA binding [GO:0000049]	GO:0000049; GO:0003723; GO:0003746; GO:0003924; GO:0005525; GO:0005576; GO:0005615; GO:0005634; GO:0005730; GO:0005737; GO:0005829; GO:0005853; GO:0005886; GO:0006412; GO:0006414; GO:0016020; GO:0019900; GO:0019901; GO:0030864; GO:0032587; GO:0034774; GO:0043312; GO:0070062; GO:0071364; GO:0098574; GO:1900022; GO:1904714; GO:1904813		SUBCELLULAR LOCATION: Cytoplasm {ECO:0000269|PubMed:19158340, ECO:0000269|PubMed:8650580}. Nucleus {ECO:0000269|PubMed:17177976, ECO:0000269|PubMed:8650580}. Nucleus, nucleolus {ECO:0000269|PubMed:8650580}. Cell membrane {ECO:0000269|PubMed:26497934}. Note=Colocalizes with DLC1 at actin-rich regions in the cell periphery (PubMed:19158340). Translocates together with ZPR1 from the cytoplasm to the…		14	71	Elongation factor 1-alpha 1 OS=Homo sapiens OX=9606 GN=EEF1A1 PE=1 SV=1 - [EF1A1_HUMAN]	66.88	2	18	29	786	2.48838e+10	2.1713e+10	1.66167e+10	1159.12	66.88	27	283	1040.28	55.19	25	248	1078.02	64.07	27	255	462	50.1091	9.01221
P63104	1433Z	14-3-3 protein zeta/delta (Protein kinase C inhibitor protein 1) (KCIP-1)	FUNCTION: Adapter protein implicated in the regulation of a large spectrum of both general and specialized signaling pathways. Binds to a large number of partners, usually by recognition of a phosphoserine or phosphothreonine motif. Binding generally results in the modulation of the activity of the binding partner. Induces ARHGEF7 activity on RAC1 as well as lamellipodia and membrane ruffle forma…	angiogenesis [GO:0001525]; cytokine-mediated signaling pathway [GO:0019221]; ERK1 and ERK2 cascade [GO:0070371]; establishment of Golgi localization [GO:0051683]; Golgi reassembly [GO:0090168]; lung development [GO:0030324]; membrane organization [GO:0061024]; negative regulation of apoptotic process [GO:0043066]; platelet activation [GO:0030168]; positive regulation of protein insertion into mit…	blood microparticle [GO:0072562]; cell [GO:0005623]; cytoplasm [GO:0005737]; cytosol [GO:0005829]; extracellular exosome [GO:0070062]; extracellular space [GO:0005615]; focal adhesion [GO:0005925]; glutamatergic synapse [GO:0098978]; hippocampal mossy fiber to CA3 synapse [GO:0098686]; melanosome [GO:0042470]; mitochondrion [GO:0005739]; nucleoplasm [GO:0005654]; nucleus [GO:0005634]; vesicle [GO…	blood microparticle [GO:0072562]; cell [GO:0005623]; cytoplasm [GO:0005737]; cytosol [GO:0005829]; extracellular exosome [GO:0070062]; extracellular space [GO:0005615]; focal adhesion [GO:0005925]; glutamatergic synapse [GO:0098978]; hippocampal mossy fiber to CA3 synapse [GO:0098686]; melanosome [GO:0042470]; mitochondrion [GO:0005739]; nucleoplasm [GO:0005654]; nucleus [GO:0005634]; vesicle [GO…	cadherin binding [GO:0045296]; identical protein binding [GO:0042802]; ion channel binding [GO:0044325]; protein domain specific binding [GO:0019904]; protein kinase binding [GO:0019901]; RNA binding [GO:0003723]; transcription factor binding [GO:0008134]; ubiquitin protein ligase binding [GO:0031625]	GO:0001525; GO:0003016; GO:0003723; GO:0005615; GO:0005623; GO:0005634; GO:0005654; GO:0005737; GO:0005739; GO:0005829; GO:0005925; GO:0006468; GO:0006605; GO:0007165; GO:0008039; GO:0008134; GO:0019221; GO:0019901; GO:0019904; GO:0030168; GO:0030324; GO:0031625; GO:0031982; GO:0035148; GO:0042470; GO:0042802; GO:0043066; GO:0043488; GO:0044325; GO:0045296; GO:0051683; GO:0061024; GO:0070062; GO:…		SUBCELLULAR LOCATION: Cytoplasm {ECO:0000269|PubMed:17081065}. Melanosome {ECO:0000269|PubMed:17081065}. Note=Located to stage I to stage IV melanosomes.		15	69	14-3-3 protein zeta/delta OS=Homo sapiens OX=9606 GN=YWHAZ PE=1 SV=1 - [1433Z_HUMAN]	74.29	1	16	20	193	5.47258e+09	4.96538e+09	3.88558e+09	227.288	73.88	19	68	209.867	71.02	18	64	189.362	71.43	18	61	245	27.7277	4.79248
P00558	PGK1	Phosphoglycerate kinase 1 (EC 2.7.2.3) (Cell migration-inducing gene 10 protein) (Primer recognition protein 2) (PRP 2)	FUNCTION: Catalyzes one of the two ATP producing reactions in the glycolytic pathway via the reversible conversion of 1,3-diphosphoglycerate to 3-phosphoglycerate (PubMed:30323285, PubMed:7391028). In addition to its role as a glycolytic enzyme, it seems that PGK-1 acts as a polymerase alpha cofactor protein (primer recognition protein) (PubMed:2324090). May play a role in sperm motility (PubMed:…	canonical glycolysis [GO:0061621]; cellular response to hypoxia [GO:0071456]; epithelial cell differentiation [GO:0030855]; gluconeogenesis [GO:0006094]; glycolytic process [GO:0006096]; negative regulation of angiogenesis [GO:0016525]; phosphorylation [GO:0016310]; plasminogen activation [GO:0031639]; positive regulation of oxidative phosphorylation [GO:1903862]	cytosol [GO:0005829]; extracellular exosome [GO:0070062]; extracellular space [GO:0005615]; membrane [GO:0016020]; membrane raft [GO:0045121]	cytosol [GO:0005829]; extracellular exosome [GO:0070062]; extracellular space [GO:0005615]; membrane [GO:0016020]; membrane raft [GO:0045121]; ADP binding [GO:0043531]; ATP binding [GO:0005524]; phosphoglycerate kinase activity [GO:0004618]; protein-disulfide reductase activity [GO:0047134]; canonical glycolysis [GO:0061621]; cellular response to hypoxia [GO:0071456]; epithelial cell differentiat…	ADP binding [GO:0043531]; ATP binding [GO:0005524]; phosphoglycerate kinase activity [GO:0004618]; protein-disulfide reductase activity [GO:0047134]	GO:0004618; GO:0005524; GO:0005615; GO:0005829; GO:0006094; GO:0006096; GO:0016020; GO:0016310; GO:0016525; GO:0030855; GO:0031639; GO:0043531; GO:0045121; GO:0047134; GO:0061621; GO:0070062; GO:0071456; GO:1903862		SUBCELLULAR LOCATION: Cytoplasm.		16	69	Phosphoglycerate kinase 1 OS=Homo sapiens OX=9606 GN=PGK1 PE=1 SV=3 - [PGK1_HUMAN]	71.46	2	24	24	226	3.22081e+09	2.08759e+09	2.26764e+09	294.97	69.3	23	81	258.198	65.71	22	68	288.567	68.35	22	77	417	44.5861	8.104
P13639	EF2	Elongation factor 2 (EF-2)	FUNCTION: Catalyzes the GTP-dependent ribosomal translocation step during translation elongation. During this step, the ribosome changes from the pre-translocational (PRE) to the post-translocational (POST) state as the newly formed A-site-bound peptidyl-tRNA and P-site-bound deacylated tRNA move to the P and E sites, respectively. Catalyzes the coordinated movement of the two tRNA molecules, the…	aging [GO:0007568]; cellular response to brain-derived neurotrophic factor stimulus [GO:1990416]; glial cell proliferation [GO:0014009]; hematopoietic progenitor cell differentiation [GO:0002244]; neutrophil degranulation [GO:0043312]; positive regulation of cytoplasmic translation [GO:2000767]; positive regulation of translation [GO:0045727]; response to endoplasmic reticulum stress [GO:0034976]…	aggresome [GO:0016235]; cytoplasm [GO:0005737]; cytosol [GO:0005829]; extracellular exosome [GO:0070062]; extracellular region [GO:0005576]; ficolin-1-rich granule lumen [GO:1904813]; membrane [GO:0016020]; membrane raft [GO:0045121]; nucleus [GO:0005634]; plasma membrane [GO:0005886]; polysomal ribosome [GO:0042788]; ribonucleoprotein complex [GO:1990904]; secretory granule lumen [GO:0034774]; s…	aggresome [GO:0016235]; cytoplasm [GO:0005737]; cytosol [GO:0005829]; extracellular exosome [GO:0070062]; extracellular region [GO:0005576]; ficolin-1-rich granule lumen [GO:1904813]; membrane [GO:0016020]; membrane raft [GO:0045121]; nucleus [GO:0005634]; plasma membrane [GO:0005886]; polysomal ribosome [GO:0042788]; ribonucleoprotein complex [GO:1990904]; secretory granule lumen [GO:0034774]; s…	5S rRNA binding [GO:0008097]; actin filament binding [GO:0051015]; cadherin binding [GO:0045296]; GTPase activity [GO:0003924]; GTP binding [GO:0005525]; p53 binding [GO:0002039]; protein kinase binding [GO:0019901]; ribosome binding [GO:0043022]; RNA binding [GO:0003723]; translation elongation factor activity [GO:0003746]	GO:0002039; GO:0002244; GO:0002931; GO:0003009; GO:0003723; GO:0003746; GO:0003924; GO:0005525; GO:0005576; GO:0005634; GO:0005737; GO:0005829; GO:0005886; GO:0006414; GO:0007568; GO:0008097; GO:0014009; GO:0016020; GO:0016235; GO:0019901; GO:0032355; GO:0034774; GO:0034976; GO:0035914; GO:0042542; GO:0042788; GO:0043022; GO:0043312; GO:0045121; GO:0045202; GO:0045296; GO:0045471; GO:0045727; GO:…		SUBCELLULAR LOCATION: Cytoplasm {ECO:0000269|PubMed:25064856}. Nucleus {ECO:0000269|PubMed:24648518}. Note=Phosphorylation by CSK promotes cleavage and SUMOylation-dependent nuclear translocation of the C-terminal cleavage product. {ECO:0000269|PubMed:24648518}.		17	69	Elongation factor 2 OS=Homo sapiens OX=9606 GN=EEF2 PE=1 SV=4 - [EF2_HUMAN]	70.86	1	58	59	511	2.58789e+09	2.23613e+09	1.80684e+09	562.157	67.13	52	181	490.888	62.94	52	156	543.749	65.97	54	174	858	95.277	6.82959
P04075	ALDOA	Fructose-bisphosphate aldolase A (EC 4.1.2.13) (Lung cancer antigen NY-LU-1) (Muscle-type aldolase)	FUNCTION: Plays a key role in glycolysis and gluconeogenesis. In addition, may also function as scaffolding protein (By similarity). {ECO:0000250}.	actin filament organization [GO:0007015]; ATP biosynthetic process [GO:0006754]; binding of sperm to zona pellucida [GO:0007339]; canonical glycolysis [GO:0061621]; fructose 1,6-bisphosphate metabolic process [GO:0030388]; fructose metabolic process [GO:0006000]; gluconeogenesis [GO:0006094]; glycolytic process [GO:0006096]; muscle cell cellular homeostasis [GO:0046716]; neutrophil degranulation …	actin cytoskeleton [GO:0015629]; cell [GO:0005623]; cytosol [GO:0005829]; extracellular exosome [GO:0070062]; extracellular region [GO:0005576]; extracellular space [GO:0005615]; ficolin-1-rich granule lumen [GO:1904813]; I band [GO:0031674]; M band [GO:0031430]; membrane [GO:0016020]; nucleus [GO:0005634]; platelet alpha granule lumen [GO:0031093]; secretory granule lumen [GO:0034774]; sperm hea…	actin cytoskeleton [GO:0015629]; cell [GO:0005623]; cytosol [GO:0005829]; extracellular exosome [GO:0070062]; extracellular region [GO:0005576]; extracellular space [GO:0005615]; ficolin-1-rich granule lumen [GO:1904813]; I band [GO:0031674]; M band [GO:0031430]; membrane [GO:0016020]; nucleus [GO:0005634]; platelet alpha granule lumen [GO:0031093]; secretory granule lumen [GO:0034774]; sperm hea…	actin binding [GO:0003779]; cadherin binding [GO:0045296]; cytoskeletal protein binding [GO:0008092]; fructose binding [GO:0070061]; fructose-bisphosphate aldolase activity [GO:0004332]; identical protein binding [GO:0042802]; RNA binding [GO:0003723]; tubulin binding [GO:0015631]	GO:0002576; GO:0003723; GO:0003779; GO:0004332; GO:0005576; GO:0005615; GO:0005623; GO:0005634; GO:0005829; GO:0006000; GO:0006094; GO:0006096; GO:0006754; GO:0006941; GO:0007015; GO:0007339; GO:0008092; GO:0008360; GO:0015629; GO:0015631; GO:0016020; GO:0030388; GO:0031093; GO:0031430; GO:0031674; GO:0034774; GO:0042802; GO:0043312; GO:0045296; GO:0046716; GO:0051289; GO:0061621; GO:0061827; GO:…		SUBCELLULAR LOCATION: Cytoplasm, myofibril, sarcomere, I band. Cytoplasm, myofibril, sarcomere, M line. Note=In skeletal muscle, accumulates around the M line and within the I band, colocalizing with FBP2 on both sides of the Z line in the absence of Ca(2+). {ECO:0000250}.		18	69	Fructose-bisphosphate aldolase A OS=Homo sapiens OX=9606 GN=ALDOA PE=1 SV=2 - [ALDOA_HUMAN]	82.14	2	27	31	486	4.56936e+09	4.70162e+09	3.83915e+09	683.806	73.35	27	169	662.95	79.12	27	168	573.587	79.67	28	149	364	39.3953	8.08936
P08238	HS90B	Heat shock protein HSP 90-beta (HSP 90) (Heat shock 84 kDa) (HSP 84) (HSP84)	FUNCTION: Molecular chaperone that promotes the maturation, structural maintenance and proper regulation of specific target proteins involved for instance in cell cycle control and signal transduction. Undergoes a functional cycle that is linked to its ATPase activity. This cycle probably induces conformational changes in the client proteins, thereby causing their activation. Interacts dynamicall…	axon extension [GO:0048675]; cellular response to drug [GO:0035690]; cellular response to heat [GO:0034605]; cellular response to interleukin-4 [GO:0071353]; cellular response to organic cyclic compound [GO:0071407]; central nervous system neuron axonogenesis [GO:0021955]; chaperone-mediated protein complex assembly [GO:0051131]; establishment of cell polarity [GO:0030010]; Fc-gamma receptor sign…	apical plasma membrane [GO:0016324]; aryl hydrocarbon receptor complex [GO:0034751]; axonal growth cone [GO:0044295]; basolateral plasma membrane [GO:0016323]; brush border membrane [GO:0031526]; cell surface [GO:0009986]; cytoplasm [GO:0005737]; cytosol [GO:0005829]; dendritic growth cone [GO:0044294]; extracellular exosome [GO:0070062]; extracellular region [GO:0005576]; ficolin-1-rich granule …	apical plasma membrane [GO:0016324]; aryl hydrocarbon receptor complex [GO:0034751]; axonal growth cone [GO:0044295]; basolateral plasma membrane [GO:0016323]; brush border membrane [GO:0031526]; cell surface [GO:0009986]; cytoplasm [GO:0005737]; cytosol [GO:0005829]; dendritic growth cone [GO:0044294]; extracellular exosome [GO:0070062]; extracellular region [GO:0005576]; ficolin-1-rich granule …	ATPase activity, coupled [GO:0042623]; ATP binding [GO:0005524]; ATP-dependent protein binding [GO:0043008]; cadherin binding [GO:0045296]; CTP binding [GO:0002135]; dATP binding [GO:0032564]; disordered domain specific binding [GO:0097718]; DNA polymerase binding [GO:0070182]; double-stranded RNA binding [GO:0003725]; GTP binding [GO:0005525]; heat shock protein binding [GO:0031072]; histone dea…	GO:0001890; GO:0002134; GO:0002135; GO:0003723; GO:0003725; GO:0005524; GO:0005525; GO:0005576; GO:0005634; GO:0005654; GO:0005737; GO:0005739; GO:0005765; GO:0005829; GO:0005886; GO:0006457; GO:0006805; GO:0006986; GO:0007004; GO:0009651; GO:0009986; GO:0016020; GO:0016234; GO:0016323; GO:0016324; GO:0017098; GO:0019062; GO:0019887; GO:0019900; GO:0019901; GO:0021955; GO:0023026; GO:0030010; GO:…		SUBCELLULAR LOCATION: Cytoplasm {ECO:0000269|PubMed:16580629, ECO:0000269|PubMed:18239673, ECO:0000269|PubMed:24880080, ECO:0000269|PubMed:9482106}. Melanosome {ECO:0000269|PubMed:17081065}. Nucleus {ECO:0000269|PubMed:18239673}. Secreted {ECO:0000269|PubMed:20599762}. Cell membrane {ECO:0000269|PubMed:20599762}. Note=Identified by mass spectrometry in melanosome fractions from stage I to stage I…		19	67	Heat shock protein HSP 90-beta OS=Homo sapiens OX=9606 GN=HSP90AB1 PE=1 SV=4 - [HS90B_HUMAN]	67.4	3	36	54	677	8.42586e+09	9.3206e+09	6.4763e+09	751.793	63.95	45	221	762.828	61.88	48	214	832.027	63.67	52	242	724	83.2121	5.03369
P08758	ANXA5	Annexin A5 (Anchorin CII) (Annexin V) (Annexin-5) (Calphobindin I) (CBP-I) (Endonexin II) (Lipocortin V) (Placental anticoagulant protein 4) (PP4) (Placental anticoagulant protein I) (PAP-I) (Thromboplastin inhibitor) (Vascular anticoagulant-alpha) (VAC-alpha)	FUNCTION: This protein is an anticoagulant protein that acts as an indirect inhibitor of the thromboplastin-specific complex, which is involved in the blood coagulation cascade.	blood coagulation [GO:0007596]; cellular response to gonadotropin-releasing hormone [GO:0097211]; cellular response to lead ion [GO:0071284]; negative regulation of apoptotic process [GO:0043066]; negative regulation of blood coagulation [GO:0030195]; negative regulation of prolactin secretion [GO:1902721]; negative regulation of sequestering of calcium ion [GO:0051283]; platelet degranulation [G…	collagen-containing extracellular matrix [GO:0062023]; cytoplasm [GO:0005737]; cytosol [GO:0005829]; endothelial microparticle [GO:0072563]; external side of plasma membrane [GO:0009897]; extracellular exosome [GO:0070062]; extracellular region [GO:0005576]; focal adhesion [GO:0005925]; intracellular [GO:0005622]; membrane [GO:0016020]	collagen-containing extracellular matrix [GO:0062023]; cytoplasm [GO:0005737]; cytosol [GO:0005829]; endothelial microparticle [GO:0072563]; external side of plasma membrane [GO:0009897]; extracellular exosome [GO:0070062]; extracellular region [GO:0005576]; focal adhesion [GO:0005925]; intracellular [GO:0005622]; membrane [GO:0016020]; calcium ion binding [GO:0005509]; calcium transmembrane tran…	calcium-dependent phospholipid binding [GO:0005544]; calcium ion binding [GO:0005509]; calcium transmembrane transporter activity, phosphorylative mechanism [GO:0005388]; heparin binding [GO:0008201]; peptide hormone binding [GO:0017046]; phospholipase inhibitor activity [GO:0004859]; phospholipid binding [GO:0005543]; receptor tyrosine kinase binding [GO:0030971]	GO:0002576; GO:0004859; GO:0005388; GO:0005509; GO:0005543; GO:0005544; GO:0005576; GO:0005622; GO:0005737; GO:0005829; GO:0005925; GO:0007165; GO:0007596; GO:0008201; GO:0009897; GO:0010033; GO:0016020; GO:0017046; GO:0030195; GO:0030971; GO:0043065; GO:0043066; GO:0051283; GO:0051592; GO:0062023; GO:0070062; GO:0071284; GO:0072563; GO:0097066; GO:0097211; GO:1901317; GO:1902721				20	67	Annexin A5 OS=Homo sapiens OX=9606 GN=ANXA5 PE=1 SV=2 - [ANXA5_HUMAN]	65.31	2	22	23	156	8.16568e+08	9.24103e+08	9.60471e+08	142.867	52.19	17	48	150.168	61.56	20	51	161.083	58.44	20	57	320	35.9144	5.04639
P49327	FAS	Fatty acid synthase (EC 2.3.1.85) [Includes: [Acyl-carrier-protein] S-acetyltransferase (EC 2.3.1.38); [Acyl-carrier-protein] S-malonyltransferase (EC 2.3.1.39); 3-oxoacyl-[acyl-carrier-protein] synthase (EC 2.3.1.41); 3-oxoacyl-[acyl-carrier-protein] reductase (EC 1.1.1.100); 3-hydroxyacyl-[acyl-carrier-protein] dehydratase (EC 4.2.1.59); Enoyl-[acyl-carrier-protein] reductase (EC 1.3.1.39); Ole…	FUNCTION: Fatty acid synthetase catalyzes the formation of long-chain fatty acids from acetyl-CoA, malonyl-CoA and NADPH. This multifunctional protein has 7 catalytic activities as an acyl carrier protein.	acetyl-CoA metabolic process [GO:0006084]; cellular response to interleukin-4 [GO:0071353]; establishment of endothelial intestinal barrier [GO:0090557]; ether lipid biosynthetic process [GO:0008611]; fatty acid biosynthetic process [GO:0006633]; fatty acid metabolic process [GO:0006631]; fatty-acyl-CoA biosynthetic process [GO:0046949]; glandular epithelial cell development [GO:0002068]; mammary…	cytosol [GO:0005829]; extracellular exosome [GO:0070062]; glycogen granule [GO:0042587]; Golgi apparatus [GO:0005794]; melanosome [GO:0042470]; membrane [GO:0016020]; plasma membrane [GO:0005886]	cytosol [GO:0005829]; extracellular exosome [GO:0070062]; glycogen granule [GO:0042587]; Golgi apparatus [GO:0005794]; melanosome [GO:0042470]; membrane [GO:0016020]; plasma membrane [GO:0005886]; (3R)-hydroxymyristoyl-[acyl-carrier-protein] dehydratase activity [GO:0008659]; 3-hydroxydecanoyl-[acyl-carrier-protein] dehydratase activity [GO:0008693]; 3-hydroxyoctanoyl-[acyl-carrier-protein] dehyd…	(3R)-hydroxymyristoyl-[acyl-carrier-protein] dehydratase activity [GO:0008659]; [acyl-carrier-protein] S-acetyltransferase activity [GO:0004313]; [acyl-carrier-protein] S-malonyltransferase activity [GO:0004314]; 3-hydroxydecanoyl-[acyl-carrier-protein] dehydratase activity [GO:0008693]; 3-hydroxyoctanoyl-[acyl-carrier-protein] dehydratase activity [GO:0047451]; 3-hydroxypalmitoyl-[acyl-carrier-p…	GO:0001649; GO:0002068; GO:0003723; GO:0004313; GO:0004314; GO:0004315; GO:0004316; GO:0004317; GO:0004320; GO:0005794; GO:0005829; GO:0005886; GO:0006084; GO:0006631; GO:0006633; GO:0008144; GO:0008611; GO:0008659; GO:0008693; GO:0016020; GO:0016295; GO:0016296; GO:0030223; GO:0030224; GO:0030879; GO:0031177; GO:0031325; GO:0042470; GO:0042587; GO:0042802; GO:0045296; GO:0045540; GO:0046949; GO:…		SUBCELLULAR LOCATION: Cytoplasm {ECO:0000269|PubMed:17081065}. Melanosome {ECO:0000269|PubMed:17081065}. Note=Identified by mass spectrometry in melanosome fractions from stage I to stage IV.		21	66	Fatty acid synthase OS=Homo sapiens OX=9606 GN=FASN PE=1 SV=3 - [FAS_HUMAN]	46.83	1	79	79	295	3.9463e+08	3.51545e+08	3.17325e+08	325.776	38.75	67	110	279.108	32.54	55	86	310.601	37.91	64	99	2511	273.254	6.44287
P62258	1433E	14-3-3 protein epsilon (14-3-3E)	FUNCTION: Adapter protein implicated in the regulation of a large spectrum of both general and specialized signaling pathways. Binds to a large number of partners, usually by recognition of a phosphoserine or phosphothreonine motif. Binding generally results in the modulation of the activity of the binding partner (By similarity). Positively regulates phosphorylated protein HSF1 nuclear export to…	cellular response to heat [GO:0034605]; cerebral cortex development [GO:0021987]; ciliary basal body-plasma membrane docking [GO:0097711]; G2/M transition of mitotic cell cycle [GO:0000086]; hippocampus development [GO:0021766]; hippo signaling [GO:0035329]; intracellular signal transduction [GO:0035556]; MAPK cascade [GO:0000165]; membrane organization [GO:0061024]; membrane repolarization durin…	cell [GO:0005623]; central region of growth cone [GO:0090724]; cytoplasm [GO:0005737]; cytosol [GO:0005829]; extracellular exosome [GO:0070062]; focal adhesion [GO:0005925]; glutamatergic synapse [GO:0098978]; kinesin complex [GO:0005871]; melanosome [GO:0042470]; membrane [GO:0016020]; mitochondrion [GO:0005739]; nucleus [GO:0005634]	cell [GO:0005623]; central region of growth cone [GO:0090724]; cytoplasm [GO:0005737]; cytosol [GO:0005829]; extracellular exosome [GO:0070062]; focal adhesion [GO:0005925]; glutamatergic synapse [GO:0098978]; kinesin complex [GO:0005871]; melanosome [GO:0042470]; membrane [GO:0016020]; mitochondrion [GO:0005739]; nucleus [GO:0005634]; cadherin binding [GO:0045296]; calcium channel regulator acti…	cadherin binding [GO:0045296]; calcium channel regulator activity [GO:0005246]; enzyme binding [GO:0019899]; histone deacetylase binding [GO:0042826]; identical protein binding [GO:0042802]; ion channel binding [GO:0044325]; MHC class II protein complex binding [GO:0023026]; phosphoprotein binding [GO:0051219]; phosphoserine residue binding [GO:0050815]; potassium channel regulator activity [GO:0…	GO:0000086; GO:0000165; GO:0001764; GO:0003064; GO:0003723; GO:0005246; GO:0005623; GO:0005634; GO:0005737; GO:0005739; GO:0005829; GO:0005871; GO:0005925; GO:0006605; GO:0010389; GO:0015459; GO:0016020; GO:0016032; GO:0019899; GO:0019904; GO:0021762; GO:0021766; GO:0021987; GO:0023026; GO:0031625; GO:0034504; GO:0034605; GO:0035329; GO:0035556; GO:0042470; GO:0042802; GO:0042826; GO:0043154; GO:…		SUBCELLULAR LOCATION: Nucleus {ECO:0000269|PubMed:12917326}. Cytoplasm {ECO:0000269|PubMed:12917326}. Melanosome {ECO:0000269|PubMed:12042314, ECO:0000269|PubMed:17081065}. Note=Identified by mass spectrometry in melanosome fractions from stage I to stage IV. {ECO:0000269|PubMed:12042314, ECO:0000269|PubMed:17081065}.		22	65	14-3-3 protein epsilon OS=Homo sapiens OX=9606 GN=YWHAE PE=1 SV=1 - [1433E_HUMAN]	65.49	1	15	17	185	5.04437e+09	4.47439e+09	3.09892e+09	242.527	65.49	17	74	197.546	65.49	17	61	158.226	65.49	15	50	255	29.1554	4.7417
Q00610	CLH1	Clathrin heavy chain 1 (Clathrin heavy chain on chromosome 17) (CLH-17)	FUNCTION: Clathrin is the major protein of the polyhedral coat of coated pits and vesicles. Two different adapter protein complexes link the clathrin lattice either to the plasma membrane or to the trans-Golgi network. Acts as component of the TACC3/ch-TOG/clathrin complex proposed to contribute to stabilization of kinetochore fibers of the mitotic spindle by acting as inter-microtubule bridge (P…	amyloid-beta clearance by transcytosis [GO:0150093]; antigen processing and presentation of exogenous peptide antigen via MHC class II [GO:0019886]; autophagy [GO:0006914]; cell division [GO:0051301]; clathrin coat assembly [GO:0048268]; clathrin-dependent endocytosis [GO:0072583]; intracellular protein transport [GO:0006886]; low-density lipoprotein particle clearance [GO:0034383]; low-density l…	clathrin coat [GO:0030118]; clathrin-coated endocytic vesicle [GO:0045334]; clathrin-coated endocytic vesicle membrane [GO:0030669]; clathrin-coated vesicle [GO:0030136]; clathrin coat of coated pit [GO:0030132]; clathrin coat of trans-Golgi network vesicle [GO:0030130]; clathrin complex [GO:0071439]; cytosol [GO:0005829]; endolysosome membrane [GO:0036020]; endosome [GO:0005768]; extracellular e…	clathrin coat [GO:0030118]; clathrin coat of coated pit [GO:0030132]; clathrin coat of trans-Golgi network vesicle [GO:0030130]; clathrin complex [GO:0071439]; clathrin-coated endocytic vesicle [GO:0045334]; clathrin-coated endocytic vesicle membrane [GO:0030669]; clathrin-coated vesicle [GO:0030136]; cytosol [GO:0005829]; endolysosome membrane [GO:0036020]; endosome [GO:0005768]; extracellular e…	clathrin light chain binding [GO:0032051]; disordered domain specific binding [GO:0097718]; double-stranded RNA binding [GO:0003725]; low-density lipoprotein particle receptor binding [GO:0050750]; protein kinase binding [GO:0019901]; RNA binding [GO:0003723]; structural molecule activity [GO:0005198]; ubiquitin-specific protease binding [GO:1990381]	GO:0000278; GO:0001649; GO:0003723; GO:0003725; GO:0005198; GO:0005764; GO:0005768; GO:0005819; GO:0005829; GO:0005886; GO:0005925; GO:0006886; GO:0006898; GO:0006914; GO:0016020; GO:0019886; GO:0019901; GO:0030118; GO:0030130; GO:0030132; GO:0030136; GO:0030669; GO:0031623; GO:0032051; GO:0032588; GO:0032802; GO:0032991; GO:0033572; GO:0034383; GO:0036020; GO:0042147; GO:0042470; GO:0045334; GO:…		SUBCELLULAR LOCATION: Cytoplasmic vesicle membrane {ECO:0000269|PubMed:17081065}; Peripheral membrane protein {ECO:0000269|PubMed:17081065}; Cytoplasmic side {ECO:0000269|PubMed:17081065}. Membrane, coated pit {ECO:0000269|PubMed:17081065}; Peripheral membrane protein {ECO:0000269|PubMed:17081065}; Cytoplasmic side {ECO:0000269|PubMed:17081065}. Melanosome {ECO:0000269|PubMed:17081065}. Cytoplasm…		23	64	Clathrin heavy chain 1 OS=Homo sapiens OX=9606 GN=CLTC PE=1 SV=5 - [CLH1_HUMAN]	55.76	1	74	74	443	5.73583e+08	7.05158e+08	6.55058e+08	479.49	51.88	64	143	533.095	48.9	66	154	476.463	49.73	64	146	1675	191.493	5.69385
P60033	CD81	CD81 antigen (26 kDa cell surface protein TAPA-1) (Target of the antiproliferative antibody 1) (Tetraspanin-28) (Tspan-28) (CD antigen CD81)	FUNCTION: Structural component of specialized membrane microdomains known as tetraspanin-enriched microdomains (TERMs), which act as platforms for receptor clustering and signaling. Essential for trafficking and compartmentalization of CD19 receptor on the surface of activated B cells (PubMed:20237408, PubMed:27881302, PubMed:16449649). Upon initial encounter with microbial pathogens, enables the…	activation of MAPK activity [GO:0000187]; CD4-positive, alpha-beta T cell costimulation [GO:0035783]; cellular response to low-density lipoprotein particle stimulus [GO:0071404]; humoral immune response mediated by circulating immunoglobulin [GO:0002455]; immunological synapse formation [GO:0001771]; macrophage fusion [GO:0034238]; myoblast fusion involved in skeletal muscle regeneration [GO:0014…	basolateral plasma membrane [GO:0016323]; extracellular exosome [GO:0070062]; focal adhesion [GO:0005925]; immunological synapse [GO:0001772]; integral component of membrane [GO:0016021]; integral component of plasma membrane [GO:0005887]; membrane [GO:0016020]; plasma membrane [GO:0005886]; tetraspanin-enriched microdomain [GO:0097197]; vesicle [GO:0031982]	basolateral plasma membrane [GO:0016323]; extracellular exosome [GO:0070062]; focal adhesion [GO:0005925]; immunological synapse [GO:0001772]; integral component of membrane [GO:0016021]; integral component of plasma membrane [GO:0005887]; membrane [GO:0016020]; plasma membrane [GO:0005886]; tetraspanin-enriched microdomain [GO:0097197]; vesicle [GO:0031982]; cholesterol binding [GO:0015485]; int…	cholesterol binding [GO:0015485]; integrin binding [GO:0005178]; MHC class II protein binding [GO:0042289]; MHC class II protein complex binding [GO:0023026]; transferrin receptor binding [GO:1990459]; virus receptor activity [GO:0001618]	GO:0000187; GO:0001618; GO:0001771; GO:0001772; GO:0002455; GO:0002863; GO:0005178; GO:0005886; GO:0005887; GO:0005925; GO:0008104; GO:0008284; GO:0014905; GO:0015485; GO:0016020; GO:0016021; GO:0016323; GO:0023026; GO:0030449; GO:0030890; GO:0031623; GO:0031647; GO:0031982; GO:0034238; GO:0035783; GO:0042289; GO:0043128; GO:0045944; GO:0046718; GO:0046813; GO:0050731; GO:0050776; GO:0050861; GO:…		SUBCELLULAR LOCATION: Cell membrane {ECO:0000269|PubMed:1383329, ECO:0000269|PubMed:1695320, ECO:0000269|PubMed:20237408, ECO:0000269|PubMed:22307619, ECO:0000269|PubMed:2398277}; Multi-pass membrane protein {ECO:0000255}. Basolateral cell membrane {ECO:0000269|PubMed:20375010}; Multi-pass membrane protein {ECO:0000255}. Note=Associates with CLDN1 and the CLDN1-CD81 complex localizes to the basol…	TRANSMEM 13..33; /note="Helical"; /evidence="ECO:0000269|PubMed:27881302"; TRANSMEM 64..84; /note="Helical"; /evidence="ECO:0000269|PubMed:27881302"; TRANSMEM 90..112; /note="Helical"; /evidence="ECO:0000269|PubMed:27881302"; TRANSMEM 202..224; /note="Helical"; /evidence="ECO:0000269|PubMed:27881302"	24	64	CD81 antigen OS=Homo sapiens OX=9606 GN=CD81 PE=1 SV=1 - [CD81_HUMAN]	16.53	1	2	2	6	5.65958e+07	2.07219e+07	3.80364e+07	3.68704	9.75	1	1	5.82851	16.53	2	2	12.0438	9.75	1	3	236	25.7921	5.2876
P02768	ALBU	Serum albumin	FUNCTION: Serum albumin, the main protein of plasma, has a good binding capacity for water, Ca(2+), Na(+), K(+), fatty acids, hormones, bilirubin and drugs (Probable). Its main function is the regulation of the colloidal osmotic pressure of blood (Probable). Major zinc transporter in plasma, typically binds about 80% of all plasma zinc (PubMed:19021548). Major calcium and magnesium transporter in…	cellular protein metabolic process [GO:0044267]; cellular response to starvation [GO:0009267]; high-density lipoprotein particle remodeling [GO:0034375]; maintenance of mitochondrion location [GO:0051659]; negative regulation of apoptotic process [GO:0043066]; negative regulation of programmed cell death [GO:0043069]; platelet degranulation [GO:0002576]; post-translational protein modification [G…	blood microparticle [GO:0072562]; cytoplasm [GO:0005737]; endoplasmic reticulum [GO:0005783]; endoplasmic reticulum lumen [GO:0005788]; extracellular exosome [GO:0070062]; extracellular region [GO:0005576]; extracellular space [GO:0005615]; Golgi apparatus [GO:0005794]; nucleus [GO:0005634]; platelet alpha granule lumen [GO:0031093]; protein-containing complex [GO:0032991]	blood microparticle [GO:0072562]; cytoplasm [GO:0005737]; endoplasmic reticulum [GO:0005783]; endoplasmic reticulum lumen [GO:0005788]; extracellular exosome [GO:0070062]; extracellular region [GO:0005576]; extracellular space [GO:0005615]; Golgi apparatus [GO:0005794]; nucleus [GO:0005634]; platelet alpha granule lumen [GO:0031093]; protein-containing complex [GO:0032991]; antioxidant activity […	antioxidant activity [GO:0016209]; chaperone binding [GO:0051087]; copper ion binding [GO:0005507]; DNA binding [GO:0003677]; drug binding [GO:0008144]; enterobactin binding [GO:1903981]; exogenous protein binding [GO:0140272]; fatty acid binding [GO:0005504]; identical protein binding [GO:0042802]; pyridoxal phosphate binding [GO:0030170]; toxic substance binding [GO:0015643]; zinc ion binding […	GO:0001895; GO:0002576; GO:0003677; GO:0005504; GO:0005507; GO:0005576; GO:0005615; GO:0005634; GO:0005737; GO:0005783; GO:0005788; GO:0005794; GO:0006898; GO:0008144; GO:0008270; GO:0009267; GO:0015643; GO:0016209; GO:0030170; GO:0031093; GO:0032991; GO:0034375; GO:0042802; GO:0043066; GO:0043069; GO:0043687; GO:0044267; GO:0051087; GO:0051659; GO:0070062; GO:0072562; GO:0140272; GO:1903981		SUBCELLULAR LOCATION: Secreted.		25	63	Serum albumin OS=Homo sapiens OX=9606 GN=ALB PE=1 SV=2 - [ALBU_HUMAN]	9.85	1	7	7	40	1.00084e+09	1.26874e+09	1.16962e+09	34.2738	8.21	6	13	39.8765	9.85	7	14	37.0751	8.21	6	13	609	69.3215	6.27783
P55072	TERA	Transitional endoplasmic reticulum ATPase (TER ATPase) (EC 3.6.4.6) (15S Mg(2+)-ATPase p97 subunit) (Valosin-containing protein) (VCP)	FUNCTION: Necessary for the fragmentation of Golgi stacks during mitosis and for their reassembly after mitosis. Involved in the formation of the transitional endoplasmic reticulum (tER). The transfer of membranes from the endoplasmic reticulum to the Golgi apparatus occurs via 50-70 nm transition vesicles which derive from part-rough, part-smooth transitional elements of the endoplasmic reticulu…	activation of cysteine-type endopeptidase activity involved in apoptotic process [GO:0006919]; aggresome assembly [GO:0070842]; ATP metabolic process [GO:0046034]; autophagosome maturation [GO:0097352]; autophagy [GO:0006914]; cellular response to arsenite ion [GO:1903843]; cellular response to DNA damage stimulus [GO:0006974]; cellular response to heat [GO:0034605]; DNA repair [GO:0006281]; doub…	ATPase complex [GO:1904949]; azurophil granule lumen [GO:0035578]; cytoplasm [GO:0005737]; cytoplasmic stress granule [GO:0010494]; cytosol [GO:0005829]; Derlin-1 retrotranslocation complex [GO:0036513]; endoplasmic reticulum [GO:0005783]; endoplasmic reticulum membrane [GO:0005789]; extracellular exosome [GO:0070062]; extracellular region [GO:0005576]; ficolin-1-rich granule lumen [GO:1904813]; …	ATPase complex [GO:1904949]; azurophil granule lumen [GO:0035578]; cytoplasm [GO:0005737]; cytoplasmic stress granule [GO:0010494]; cytosol [GO:0005829]; Derlin-1 retrotranslocation complex [GO:0036513]; endoplasmic reticulum [GO:0005783]; endoplasmic reticulum membrane [GO:0005789]; extracellular exosome [GO:0070062]; extracellular region [GO:0005576]; ficolin-1-rich granule lumen [GO:1904813]; …	ADP binding [GO:0043531]; ATPase activity [GO:0016887]; ATP binding [GO:0005524]; BAT3 complex binding [GO:1904288]; deubiquitinase activator activity [GO:0035800]; identical protein binding [GO:0042802]; K48-linked polyubiquitin modification-dependent protein binding [GO:0036435]; lipid binding [GO:0008289]; MHC class I protein binding [GO:0042288]; polyubiquitin modification-dependent protein b…	GO:0000502; GO:0003723; GO:0005524; GO:0005576; GO:0005634; GO:0005654; GO:0005737; GO:0005783; GO:0005789; GO:0005811; GO:0005829; GO:0006281; GO:0006302; GO:0006457; GO:0006734; GO:0006888; GO:0006914; GO:0006919; GO:0006974; GO:0008289; GO:0010494; GO:0010498; GO:0010918; GO:0016236; GO:0016567; GO:0016579; GO:0016887; GO:0019079; GO:0019903; GO:0019904; GO:0019985; GO:0030433; GO:0030968; GO:…		SUBCELLULAR LOCATION: Cytoplasm, cytosol {ECO:0000269|PubMed:15456787}. Endoplasmic reticulum {ECO:0000269|PubMed:15215856}. Nucleus {ECO:0000269|PubMed:23042605, ECO:0000269|PubMed:26842564}. Cytoplasm, Stress granule {ECO:0000269|PubMed:29804830}. Note=Present in the neuronal hyaline inclusion bodies specifically found in motor neurons from amyotrophic lateral sclerosis patients (PubMed:1545678…		26	62	Transitional endoplasmic reticulum ATPase OS=Homo sapiens OX=9606 GN=VCP PE=1 SV=4 - [TERA_HUMAN]	57.57	2	35	35	194	5.47586e+08	5.74149e+08	3.84213e+08	222.355	49.26	29	66	227.268	44.79	26	66	214.859	43.55	24	62	806	89.2657	5.26221
P60174	TPIS	Triosephosphate isomerase (TIM) (EC 5.3.1.1) (Methylglyoxal synthase) (EC 4.2.3.3) (Triose-phosphate isomerase)	FUNCTION: Triosephosphate isomerase is an extremely efficient metabolic enzyme that catalyzes the interconversion between dihydroxyacetone phosphate (DHAP) and D-glyceraldehyde-3-phosphate (G3P) in glycolysis and gluconeogenesis. {ECO:0000269|PubMed:18562316}.; FUNCTION: It is also responsible for the non-negligible production of methylglyoxal a reactive cytotoxic side-product that modifies and c…	canonical glycolysis [GO:0061621]; gluconeogenesis [GO:0006094]; glyceraldehyde-3-phosphate biosynthetic process [GO:0046166]; glycerol catabolic process [GO:0019563]; glycolytic process [GO:0006096]; methylglyoxal biosynthetic process [GO:0019242]; multicellular organism development [GO:0007275]	cytosol [GO:0005829]; extracellular exosome [GO:0070062]; extracellular space [GO:0005615]; nucleus [GO:0005634]	cytosol [GO:0005829]; extracellular exosome [GO:0070062]; extracellular space [GO:0005615]; nucleus [GO:0005634]; methylglyoxal synthase activity [GO:0008929]; protein homodimerization activity [GO:0042803]; triose-phosphate isomerase activity [GO:0004807]; ubiquitin protein ligase binding [GO:0031625]; canonical glycolysis [GO:0061621]; gluconeogenesis [GO:0006094]; glyceraldehyde-3-phosphate bi…	methylglyoxal synthase activity [GO:0008929]; protein homodimerization activity [GO:0042803]; triose-phosphate isomerase activity [GO:0004807]; ubiquitin protein ligase binding [GO:0031625]	GO:0004807; GO:0005615; GO:0005634; GO:0005829; GO:0006094; GO:0006096; GO:0007275; GO:0008929; GO:0019242; GO:0019563; GO:0031625; GO:0042803; GO:0046166; GO:0061621; GO:0070062		SUBCELLULAR LOCATION: Cytoplasm {ECO:0000255|PROSITE-ProRule:PRU10127}.		27	62	Triosephosphate isomerase OS=Homo sapiens OX=9606 GN=TPI1 PE=1 SV=3 - [TPIS_HUMAN]	72.38	1	15	15	133	1.17454e+09	1.02117e+09	8.92322e+08	168.491	69.58	14	45	170.073	64.69	13	44	165.824	72.38	15	44	286	30.7717	5.92236
P62937	PPIA	Peptidyl-prolyl cis-trans isomerase A (PPIase A) (EC 5.2.1.8) (Cyclophilin A) (Cyclosporin A-binding protein) (Rotamase A) [Cleaved into: Peptidyl-prolyl cis-trans isomerase A, N-terminally processed]	FUNCTION: PPIases accelerate the folding of proteins. It catalyzes the cis-trans isomerization of proline imidic peptide bonds in oligopeptides. {ECO:0000269|PubMed:20676357}.	entry into host cell [GO:0030260]; establishment of integrated proviral latency [GO:0075713]; fusion of virus membrane with host plasma membrane [GO:0019064]; interleukin-12-mediated signaling pathway [GO:0035722]; leukocyte migration [GO:0050900]; lipid droplet organization [GO:0034389]; neutrophil degranulation [GO:0043312]; positive regulation of protein secretion [GO:0050714]; positive regula…	cytosol [GO:0005829]; extracellular exosome [GO:0070062]; extracellular region [GO:0005576]; extracellular space [GO:0005615]; ficolin-1-rich granule lumen [GO:1904813]; focal adhesion [GO:0005925]; membrane [GO:0016020]; nucleus [GO:0005634]; protein-containing complex [GO:0032991]; secretory granule lumen [GO:0034774]; vesicle [GO:0031982]	cytosol [GO:0005829]; extracellular exosome [GO:0070062]; extracellular region [GO:0005576]; extracellular space [GO:0005615]; ficolin-1-rich granule lumen [GO:1904813]; focal adhesion [GO:0005925]; membrane [GO:0016020]; nucleus [GO:0005634]; protein-containing complex [GO:0032991]; secretory granule lumen [GO:0034774]; vesicle [GO:0031982]; cyclosporin A binding [GO:0016018]; peptidyl-prolyl ci…	cyclosporin A binding [GO:0016018]; peptidyl-prolyl cis-trans isomerase activity [GO:0003755]; RNA binding [GO:0003723]; unfolded protein binding [GO:0051082]; virion binding [GO:0046790]	GO:0000413; GO:0003723; GO:0003755; GO:0005576; GO:0005615; GO:0005634; GO:0005829; GO:0005925; GO:0006278; GO:0006457; GO:0016018; GO:0016020; GO:0019058; GO:0019061; GO:0019064; GO:0019068; GO:0019076; GO:0030260; GO:0031982; GO:0032991; GO:0034389; GO:0034774; GO:0035722; GO:0042026; GO:0043312; GO:0045069; GO:0045070; GO:0046790; GO:0050714; GO:0050900; GO:0051082; GO:0070062; GO:0075713; GO:…		SUBCELLULAR LOCATION: Cytoplasm {ECO:0000269|PubMed:16527992}. Secreted {ECO:0000269|PubMed:16527992}. Note=Secretion occurs in response to oxidative stress in vascular smooth muscle through a vesicular secretory pathway that involves actin remodeling and myosin II activation, and mediates ERK1/2 activation.		28	62	Peptidyl-prolyl cis-trans isomerase A OS=Homo sapiens OX=9606 GN=PPIA PE=1 SV=2 - [PPIA_HUMAN]	70.3	7	10	10	172	7.24025e+09	6.41079e+09	5.31561e+09	263.455	70.3	10	64	253.925	52.12	8	53	235.296	52.12	8	55	165	18.0009	7.81104
P26038	MOES	Moesin (Membrane-organizing extension spike protein)	FUNCTION: Ezrin-radixin-moesin (ERM) family protein that connects the actin cytoskeleton to the plasma membrane and thereby regulates the structure and function of specific domains of the cell cortex. Tethers actin filaments by oscillating between a resting and an activated state providing transient interactions between moesin and the actin cytoskeleton (PubMed:10212266). Once phosphorylated on i…	cellular response to testosterone stimulus [GO:0071394]; establishment of endothelial barrier [GO:0061028]; establishment of epithelial cell apical/basal polarity [GO:0045198]; gland morphogenesis [GO:0022612]; immunological synapse formation [GO:0001771]; interleukin-12-mediated signaling pathway [GO:0035722]; leukocyte cell-cell adhesion [GO:0007159]; leukocyte migration [GO:0050900]; membrane …	apical part of cell [GO:0045177]; apical plasma membrane [GO:0016324]; basolateral plasma membrane [GO:0016323]; blood microparticle [GO:0072562]; cell periphery [GO:0071944]; cell surface [GO:0009986]; cytoplasm [GO:0005737]; cytoskeleton [GO:0005856]; cytosol [GO:0005829]; extracellular exosome [GO:0070062]; extracellular space [GO:0005615]; filopodium [GO:0030175]; focal adhesion [GO:0005925];…	apical part of cell [GO:0045177]; apical plasma membrane [GO:0016324]; basolateral plasma membrane [GO:0016323]; blood microparticle [GO:0072562]; cell periphery [GO:0071944]; cell surface [GO:0009986]; cytoplasm [GO:0005737]; cytoskeleton [GO:0005856]; cytosol [GO:0005829]; extracellular exosome [GO:0070062]; extracellular space [GO:0005615]; filopodium [GO:0030175]; focal adhesion [GO:0005925];…	actin binding [GO:0003779]; cell adhesion molecule binding [GO:0050839]; double-stranded RNA binding [GO:0003725]; enzyme binding [GO:0019899]; protein kinase binding [GO:0019901]; signaling receptor binding [GO:0005102]; structural constituent of cytoskeleton [GO:0005200]	GO:0001771; GO:0001931; GO:0003725; GO:0003779; GO:0005102; GO:0005200; GO:0005615; GO:0005634; GO:0005737; GO:0005829; GO:0005856; GO:0005886; GO:0005902; GO:0005925; GO:0007159; GO:0008360; GO:0008361; GO:0009986; GO:0010628; GO:0016032; GO:0016323; GO:0016324; GO:0019899; GO:0019901; GO:0022612; GO:0022614; GO:0030175; GO:0031143; GO:0031528; GO:0031982; GO:0035722; GO:0042098; GO:0045177; GO:…		SUBCELLULAR LOCATION: Cell membrane {ECO:0000269|PubMed:11728332, ECO:0000269|PubMed:15039356, ECO:0000269|PubMed:18586956, ECO:0000269|PubMed:7884872, ECO:0000269|PubMed:9298994}; Peripheral membrane protein {ECO:0000250|UniProtKB:P26041}; Cytoplasmic side {ECO:0000250|UniProtKB:P26041}. Cytoplasm, cytoskeleton {ECO:0000250|UniProtKB:P26041}. Apical cell membrane {ECO:0000250|UniProtKB:P26041}; …		29	62	Moesin OS=Homo sapiens OX=9606 GN=MSN PE=1 SV=3 - [MOES_HUMAN]	58.75	1	31	46	304	1.79445e+09	1.91462e+09	1839803778	324.598	53.21	37	95	359.322	55.11	40	108	337.096	54.77	39	101	577	67.7778	6.40479
P23528	COF1	Cofilin-1 (18 kDa phosphoprotein) (p18) (Cofilin, non-muscle isoform)	FUNCTION: Binds to F-actin and exhibits pH-sensitive F-actin depolymerizing activity. Regulates actin cytoskeleton dynamics. Important for normal progress through mitosis and normal cytokinesis. Plays a role in the regulation of cell morphology and cytoskeletal organization. Required for the up-regulation of atypical chemokine receptor ACKR2 from endosomal compartment to cell membrane, increasing…	actin cytoskeleton organization [GO:0030036]; actin filament depolymerization [GO:0030042]; actin filament fragmentation [GO:0030043]; cytoskeleton organization [GO:0007010]; establishment of cell polarity [GO:0030010]; interleukin-12-mediated signaling pathway [GO:0035722]; mitotic cytokinesis [GO:0000281]; negative regulation of apoptotic process [GO:0043066]; neural crest cell migration [GO:00…	cell-cell junction [GO:0005911]; cortical actin cytoskeleton [GO:0030864]; cytoplasm [GO:0005737]; cytosol [GO:0005829]; extracellular exosome [GO:0070062]; extracellular space [GO:0005615]; focal adhesion [GO:0005925]; lamellipodium [GO:0030027]; lamellipodium membrane [GO:0031258]; membrane [GO:0016020]; nuclear matrix [GO:0016363]; nucleus [GO:0005634]; ruffle membrane [GO:0032587]; vesicle [G…	cell-cell junction [GO:0005911]; cortical actin cytoskeleton [GO:0030864]; cytoplasm [GO:0005737]; cytosol [GO:0005829]; extracellular exosome [GO:0070062]; extracellular space [GO:0005615]; focal adhesion [GO:0005925]; lamellipodium [GO:0030027]; lamellipodium membrane [GO:0031258]; membrane [GO:0016020]; nuclear matrix [GO:0016363]; nucleus [GO:0005634]; ruffle membrane [GO:0032587]; vesicle [G…	actin filament binding [GO:0051015]; signaling receptor binding [GO:0005102]	GO:0000281; GO:0001755; GO:0001842; GO:0005102; GO:0005615; GO:0005634; GO:0005737; GO:0005829; GO:0005911; GO:0005925; GO:0006468; GO:0007010; GO:0007266; GO:0009615; GO:0016020; GO:0016363; GO:0022604; GO:0030010; GO:0030027; GO:0030036; GO:0030042; GO:0030043; GO:0030836; GO:0030864; GO:0031258; GO:0031982; GO:0032587; GO:0035722; GO:0043066; GO:0043200; GO:0044794; GO:0051015; GO:0061001; GO:…		SUBCELLULAR LOCATION: Nucleus matrix {ECO:0000269|PubMed:15580268}. Cytoplasm, cytoskeleton {ECO:0000269|PubMed:15580268}. Cell projection, ruffle membrane {ECO:0000269|PubMed:15580268}; Peripheral membrane protein {ECO:0000269|PubMed:15580268}; Cytoplasmic side {ECO:0000269|PubMed:15580268}. Cell projection, lamellipodium membrane {ECO:0000269|PubMed:15580268}; Peripheral membrane protein {ECO:0…		30	62	Cofilin-1 OS=Homo sapiens OX=9606 GN=CFL1 PE=1 SV=3 - [COF1_HUMAN]	69.88	1	11	16	136	5.36597e+09	4.84802e+09	3960675808	149.789	68.07	15	47	143.642	63.25	13	42	163.762	65.66	14	47	166	18.4907	8.08936
Q06830	PRDX1	Peroxiredoxin-1 (EC 1.11.1.15) (Natural killer cell-enhancing factor A) (NKEF-A) (Proliferation-associated gene protein) (PAG) (Thioredoxin peroxidase 2) (Thioredoxin-dependent peroxide reductase 2)	FUNCTION: Thiol-specific peroxidase that catalyzes the reduction of hydrogen peroxide and organic hydroperoxides to water and alcohols, respectively. Plays a role in cell protection against oxidative stress by detoxifying peroxides and as sensor of hydrogen peroxide-mediated signaling events. Might participate in the signaling cascades of growth factors and tumor necrosis factor-alpha by regulati…	cell population proliferation [GO:0008283]; cell redox homeostasis [GO:0045454]; cellular response to oxidative stress [GO:0034599]; erythrocyte homeostasis [GO:0034101]; hydrogen peroxide catabolic process [GO:0042744]; leukocyte activation [GO:0045321]; natural killer cell activation [GO:0030101]; natural killer cell mediated cytotoxicity [GO:0042267]; regulation of NIK/NF-kappaB signaling [GO:…	cell [GO:0005623]; cytoplasm [GO:0005737]; cytosol [GO:0005829]; extracellular exosome [GO:0070062]; extracellular space [GO:0005615]; melanosome [GO:0042470]; nucleus [GO:0005634]	cell [GO:0005623]; cytoplasm [GO:0005737]; cytosol [GO:0005829]; extracellular exosome [GO:0070062]; extracellular space [GO:0005615]; melanosome [GO:0042470]; nucleus [GO:0005634]; cadherin binding [GO:0045296]; identical protein binding [GO:0042802]; peroxidase activity [GO:0004601]; RNA binding [GO:0003723]; thioredoxin peroxidase activity [GO:0008379]; cell population proliferation [GO:000828…	cadherin binding [GO:0045296]; identical protein binding [GO:0042802]; peroxidase activity [GO:0004601]; RNA binding [GO:0003723]; thioredoxin peroxidase activity [GO:0008379]	GO:0001501; GO:0001895; GO:0003723; GO:0004601; GO:0005615; GO:0005623; GO:0005634; GO:0005737; GO:0005829; GO:0006979; GO:0008283; GO:0008379; GO:0019430; GO:0030101; GO:0032872; GO:0034101; GO:0034599; GO:0042267; GO:0042470; GO:0042744; GO:0042802; GO:0045296; GO:0045321; GO:0045454; GO:0070062; GO:1901222		SUBCELLULAR LOCATION: Cytoplasm {ECO:0000269|PubMed:17081065, ECO:0000269|PubMed:9497357}. Melanosome {ECO:0000269|PubMed:17081065}. Note=Identified by mass spectrometry in melanosome fractions from stage I to stage IV.		31	61	Peroxiredoxin-1 OS=Homo sapiens OX=9606 GN=PRDX1 PE=1 SV=1 - [PRDX1_HUMAN]	88.44	1	17	22	196	5770828295	5.9182e+09	5.75727e+09	215.718	85.93	19	63	219.318	73.37	18	63	251.55	75.88	21	70	199	22.0963	8.1333
P07737	PROF1	Profilin-1 (Epididymis tissue protein Li 184a) (Profilin I)	FUNCTION: Binds to actin and affects the structure of the cytoskeleton. At high concentrations, profilin prevents the polymerization of actin, whereas it enhances it at low concentrations. By binding to PIP2, it inhibits the formation of IP3 and DG. Inhibits androgen receptor (AR) and HTT aggregation and binding of G-actin is essential for its inhibition of AR. {ECO:0000269|PubMed:18573880}.	actin cytoskeleton organization [GO:0030036]; modification of postsynaptic actin cytoskeleton [GO:0098885]; negative regulation of actin filament bundle assembly [GO:0032232]; negative regulation of actin filament polymerization [GO:0030837]; negative regulation of stress fiber assembly [GO:0051497]; neural tube closure [GO:0001843]; positive regulation of actin filament bundle assembly [GO:00322…	blood microparticle [GO:0072562]; cell cortex [GO:0005938]; cytoplasm [GO:0005737]; cytoskeleton [GO:0005856]; cytosol [GO:0005829]; extracellular exosome [GO:0070062]; focal adhesion [GO:0005925]; glutamatergic synapse [GO:0098978]; membrane [GO:0016020]; nucleus [GO:0005634]	blood microparticle [GO:0072562]; cell cortex [GO:0005938]; cytoplasm [GO:0005737]; cytoskeleton [GO:0005856]; cytosol [GO:0005829]; extracellular exosome [GO:0070062]; focal adhesion [GO:0005925]; glutamatergic synapse [GO:0098978]; membrane [GO:0016020]; nucleus [GO:0005634]; actin binding [GO:0003779]; actin monomer binding [GO:0003785]; adenyl-nucleotide exchange factor activity [GO:0000774];…	actin binding [GO:0003779]; actin monomer binding [GO:0003785]; adenyl-nucleotide exchange factor activity [GO:0000774]; cadherin binding [GO:0045296]; phosphatidylinositol-4,5-bisphosphate binding [GO:0005546]; proline-rich region binding [GO:0070064]; Rho GTPase binding [GO:0017048]; RNA binding [GO:0003723]	GO:0000774; GO:0001843; GO:0003723; GO:0003779; GO:0003785; GO:0005546; GO:0005634; GO:0005737; GO:0005829; GO:0005856; GO:0005925; GO:0005938; GO:0006357; GO:0010634; GO:0016020; GO:0017048; GO:0030036; GO:0030833; GO:0030837; GO:0030838; GO:0032232; GO:0032233; GO:0032781; GO:0045296; GO:0050821; GO:0051497; GO:0060071; GO:0060074; GO:0070062; GO:0070064; GO:0072562; GO:0098885; GO:0098978; GO:…		SUBCELLULAR LOCATION: Cytoplasm, cytoskeleton.		32	61	Profilin-1 OS=Homo sapiens OX=9606 GN=PFN1 PE=1 SV=2 - [PROF1_HUMAN]	96.43	1	15	15	228	1.16408e+10	1.0179e+10	7978709395	244.231	94.29	13	79	237.06	96.43	15	75	235.773	96.43	14	74	140	15.0446	8.26514
P61224	RAP1B	Ras-related protein Rap-1b (GTP-binding protein smg p21B)	FUNCTION: GTP-binding protein that possesses intrinsic GTPase activity. Contributes to the polarizing activity of KRIT1 and CDH5 in the establishment and maintenance of correct endothelial cell polarity and vascular lumen. Required for the localization of phosphorylated PRKCZ, PARD3 and TIAM1 to the cell junction. Plays a role in the establishment of basal endothelial barrier function. {ECO:00002…	cell population proliferation [GO:0008283]; cellular response to cAMP [GO:0071320]; cellular response to drug [GO:0035690]; cellular response to gonadotropin-releasing hormone [GO:0097211]; establishment of endothelial barrier [GO:0061028]; interleukin-12-mediated signaling pathway [GO:0035722]; negative regulation of calcium ion-dependent exocytosis [GO:0045955]; negative regulation of synaptic …	azurophil granule membrane [GO:0035577]; cell-cell junction [GO:0005911]; cytosol [GO:0005829]; extracellular exosome [GO:0070062]; intracellular [GO:0005622]; lipid droplet [GO:0005811]; membrane [GO:0016020]; plasma membrane [GO:0005886]	azurophil granule membrane [GO:0035577]; cell-cell junction [GO:0005911]; cytosol [GO:0005829]; extracellular exosome [GO:0070062]; intracellular [GO:0005622]; lipid droplet [GO:0005811]; membrane [GO:0016020]; plasma membrane [GO:0005886]; GDP binding [GO:0019003]; GTP binding [GO:0005525]; GTPase activity [GO:0003924]; protein-containing complex binding [GO:0044877]; cell population proliferati…	GDP binding [GO:0019003]; GTPase activity [GO:0003924]; GTP binding [GO:0005525]; protein-containing complex binding [GO:0044877]	GO:0003924; GO:0005525; GO:0005622; GO:0005811; GO:0005829; GO:0005886; GO:0005911; GO:0008283; GO:0009743; GO:0016020; GO:0019003; GO:0032486; GO:0033625; GO:0035577; GO:0035690; GO:0035722; GO:0043312; GO:0044877; GO:0045955; GO:0061028; GO:0070062; GO:0070374; GO:0071320; GO:0097211; GO:1901888; GO:2000114; GO:2000301		SUBCELLULAR LOCATION: Cell membrane. Cytoplasm, cytosol. Cell junction. Note=May shuttle between plasma membrane and cytosol. Presence of KRIT1 and CDH5 is required for its localization to the cell junction.		33	60	Ras-related protein Rap-1b OS=Homo sapiens OX=9606 GN=RAP1B PE=1 SV=1 - [RAP1B_HUMAN]	75	2	5	12	56	4.27216e+08	4.6992e+08	3.90482e+08	49.6415	60.87	9	17	67.9723	53.8	8	20	55.6342	55.98	8	19	184	20.8116	5.78271
P05556	ITB1	Integrin beta-1 (Fibronectin receptor subunit beta) (Glycoprotein IIa) (GPIIA) (VLA-4 subunit beta) (CD antigen CD29)	FUNCTION: Integrins alpha-1/beta-1, alpha-2/beta-1, alpha-10/beta-1 and alpha-11/beta-1 are receptors for collagen. Integrins alpha-1/beta-1 and alpha-2/beta-2 recognize the proline-hydroxylated sequence G-F-P-G-E-R in collagen. Integrins alpha-2/beta-1, alpha-3/beta-1, alpha-4/beta-1, alpha-5/beta-1, alpha-8/beta-1, alpha-10/beta-1, alpha-11/beta-1 and alpha-V/beta-1 are receptors for fibronecti…	axon extension [GO:0048675]; basement membrane organization [GO:0071711]; B cell differentiation [GO:0030183]; calcium-independent cell-matrix adhesion [GO:0007161]; cardiac muscle cell differentiation [GO:0055007]; CD40 signaling pathway [GO:0023035]; cell adhesion [GO:0007155]; cell adhesion mediated by integrin [GO:0033627]; cell-cell adhesion mediated by integrin [GO:0033631]; cell fate speci…	cell [GO:0005623]; cell surface [GO:0009986]; cleavage furrow [GO:0032154]; cytoplasm [GO:0005737]; dendritic spine [GO:0043197]; external side of plasma membrane [GO:0009897]; extracellular exosome [GO:0070062]; filopodium [GO:0030175]; focal adhesion [GO:0005925]; glial cell projection [GO:0097386]; glutamatergic synapse [GO:0098978]; integral component of synaptic membrane [GO:0099699]; integr…	cell [GO:0005623]; cell surface [GO:0009986]; cleavage furrow [GO:0032154]; cytoplasm [GO:0005737]; dendritic spine [GO:0043197]; external side of plasma membrane [GO:0009897]; extracellular exosome [GO:0070062]; filopodium [GO:0030175]; focal adhesion [GO:0005925]; glial cell projection [GO:0097386]; glutamatergic synapse [GO:0098978]; integral component of synaptic membrane [GO:0099699]; integr…	actin binding [GO:0003779]; cadherin binding [GO:0045296]; cell adhesion molecule binding [GO:0050839]; collagen binding involved in cell-matrix adhesion [GO:0098639]; coreceptor activity [GO:0015026]; fibronectin binding [GO:0001968]; integrin binding [GO:0005178]; laminin binding [GO:0043236]; metal ion binding [GO:0046872]; protease binding [GO:0002020]; protein-containing complex binding [GO:…	GO:0000082; GO:0000132; GO:0001618; GO:0001701; GO:0001708; GO:0001726; GO:0001968; GO:0002020; GO:0002042; GO:0003779; GO:0005178; GO:0005623; GO:0005737; GO:0005886; GO:0005925; GO:0006909; GO:0006968; GO:0007155; GO:0007156; GO:0007159; GO:0007160; GO:0007161; GO:0007229; GO:0008284; GO:0008354; GO:0008542; GO:0009897; GO:0009986; GO:0010710; GO:0010763; GO:0014704; GO:0015026; GO:0016020; GO:…		SUBCELLULAR LOCATION: Cell membrane {ECO:0000303|PubMed:10455171}; Single-pass type I membrane protein {ECO:0000255}. Cell projection, invadopodium membrane {ECO:0000269|PubMed:10455171}; Single-pass type I membrane protein {ECO:0000255}. Cell projection, ruffle membrane {ECO:0000303|PubMed:10455171}; Single-pass type I membrane protein {ECO:0000255}. Recycling endosome {ECO:0000269|PubMed:162567…	TRANSMEM 729..751; /note="Helical"; /evidence="ECO:0000255"	34	60	Integrin beta-1 OS=Homo sapiens OX=9606 GN=ITGB1 PE=1 SV=2 - [ITB1_HUMAN]	11.9	1	7	7	16	9.70307e+07	1.22317e+08	1.04576e+08	10.0867	4.64	3	4	20.3754	9.4	5	7	11.1394	8.65	5	5	798	88.357	5.38916
P11021	BIP	Endoplasmic reticulum chaperone BiP (EC 3.6.4.10) (78 kDa glucose-regulated protein) (GRP-78) (Binding-immunoglobulin protein) (BiP) (Heat shock protein 70 family protein 5) (HSP70 family protein 5) (Heat shock protein family A member 5) (Immunoglobulin heavy chain-binding protein)	FUNCTION: Endoplasmic reticulum chaperone that plays a key role in protein folding and quality control in the endoplasmic reticulum lumen (PubMed:2294010, PubMed:23769672, PubMed:23990668, PubMed:28332555). Involved in the correct folding of proteins and degradation of misfolded proteins via its interaction with DNAJC10/ERdj5, probably to facilitate the release of DNAJC10/ERdj5 from its substrate…	ATF6-mediated unfolded protein response [GO:0036500]; cellular response to antibiotic [GO:0071236]; cellular response to calcium ion [GO:0071277]; cellular response to cAMP [GO:0071320]; cellular response to drug [GO:0035690]; cellular response to gamma radiation [GO:0071480]; cellular response to glucose starvation [GO:0042149]; cellular response to interleukin-4 [GO:0071353]; cellular response …	cell surface [GO:0009986]; cytoplasm [GO:0005737]; cytosol [GO:0005829]; endoplasmic reticulum [GO:0005783]; endoplasmic reticulum chaperone complex [GO:0034663]; endoplasmic reticulum-Golgi intermediate compartment [GO:0005793]; endoplasmic reticulum lumen [GO:0005788]; endoplasmic reticulum membrane [GO:0005789]; extracellular exosome [GO:0070062]; focal adhesion [GO:0005925]; integral componen…	cell surface [GO:0009986]; cytoplasm [GO:0005737]; cytosol [GO:0005829]; endoplasmic reticulum [GO:0005783]; endoplasmic reticulum chaperone complex [GO:0034663]; endoplasmic reticulum lumen [GO:0005788]; endoplasmic reticulum membrane [GO:0005789]; endoplasmic reticulum-Golgi intermediate compartment [GO:0005793]; extracellular exosome [GO:0070062]; focal adhesion [GO:0005925]; integral componen…	ATPase activity [GO:0016887]; ATPase activity, coupled [GO:0042623]; ATP binding [GO:0005524]; cadherin binding [GO:0045296]; calcium ion binding [GO:0005509]; chaperone binding [GO:0051087]; enzyme binding [GO:0019899]; heat shock protein binding [GO:0031072]; misfolded protein binding [GO:0051787]; protein domain specific binding [GO:0019904]; protein folding chaperone [GO:0044183]; ribosome bi…	GO:0001554; GO:0005509; GO:0005524; GO:0005634; GO:0005737; GO:0005739; GO:0005783; GO:0005788; GO:0005789; GO:0005790; GO:0005793; GO:0005829; GO:0005886; GO:0005925; GO:0006983; GO:0006986; GO:0009986; GO:0010976; GO:0016020; GO:0016887; GO:0019899; GO:0019904; GO:0021589; GO:0021680; GO:0021762; GO:0030176; GO:0030182; GO:0030335; GO:0030433; GO:0030496; GO:0030512; GO:0030968; GO:0031072; GO:…		SUBCELLULAR LOCATION: Endoplasmic reticulum lumen {ECO:0000269|PubMed:21080038, ECO:0000269|PubMed:21289099, ECO:0000269|PubMed:23990668, ECO:0000269|PubMed:29497057}. Melanosome {ECO:0000269|PubMed:12643545}. Cytoplasm {ECO:0000250|UniProtKB:P20029}. Note=Identified by mass spectrometry in melanosome fractions from stage I to stage IV. {ECO:0000269|PubMed:12643545}.		35	58	Endoplasmic reticulum chaperone BiP OS=Homo sapiens OX=9606 GN=HSPA5 PE=1 SV=2 - [BIP_HUMAN]	67.28	2	41	43	391	4.26947e+09	3.85422e+09	3.08992e+09	454.638	63	41	129	480.214	56.88	40	136	441.264	52.29	38	126	654	72.2884	5.16064
P08195	4F2	4F2 cell-surface antigen heavy chain (4F2hc) (4F2 heavy chain antigen) (Lymphocyte activation antigen 4F2 large subunit) (Solute carrier family 3 member 2) (CD antigen CD98)	FUNCTION: Component of several heterodimeric amino acid transporter complexes (PubMed:11557028, PubMed:9829974, PubMed:9751058, PubMed:10391915, PubMed:10574970, PubMed:11311135). The precise substrate specificity depends on the other subunit in the heterodimer (PubMed:9829974, PubMed:9751058, PubMed:10391915, PubMed:10574970, PubMed:30867591, PubMed:10903140). The heterodimer with SLC3A2 functio…	amino acid transport [GO:0006865]; calcium ion transport [GO:0006816]; carbohydrate metabolic process [GO:0005975]; L-alpha-amino acid transmembrane transport [GO:1902475]; leukocyte migration [GO:0050900]; L-leucine import across plasma membrane [GO:1903801]; response to exogenous dsRNA [GO:0043330]; tryptophan transport [GO:0015827]	amino acid transport complex [GO:1990184]; apical plasma membrane [GO:0016324]; cell junction [GO:0030054]; cell surface [GO:0009986]; cytosol [GO:0005829]; extracellular exosome [GO:0070062]; integral component of membrane [GO:0016021]; lysosomal membrane [GO:0005765]; melanosome [GO:0042470]; membrane [GO:0016020]; nucleoplasm [GO:0005654]; plasma membrane [GO:0005886]	amino acid transport complex [GO:1990184]; apical plasma membrane [GO:0016324]; cell junction [GO:0030054]; cell surface [GO:0009986]; cytosol [GO:0005829]; extracellular exosome [GO:0070062]; integral component of membrane [GO:0016021]; lysosomal membrane [GO:0005765]; melanosome [GO:0042470]; membrane [GO:0016020]; nucleoplasm [GO:0005654]; plasma membrane [GO:0005886]; cadherin binding [GO:004…	cadherin binding [GO:0045296]; calcium:sodium antiporter activity [GO:0005432]; catalytic activity [GO:0003824]; double-stranded RNA binding [GO:0003725]; neutral amino acid transmembrane transporter activity [GO:0015175]; RNA binding [GO:0003723]	GO:0003723; GO:0003725; GO:0003824; GO:0005432; GO:0005654; GO:0005765; GO:0005829; GO:0005886; GO:0005975; GO:0006816; GO:0006865; GO:0009986; GO:0015175; GO:0015827; GO:0016020; GO:0016021; GO:0016324; GO:0030054; GO:0042470; GO:0043330; GO:0045296; GO:0050900; GO:0070062; GO:1902475; GO:1903801; GO:1990184		SUBCELLULAR LOCATION: Apical cell membrane {ECO:0000269|PubMed:11742812}. Cell membrane {ECO:0000269|PubMed:10391915, ECO:0000269|PubMed:10574970, ECO:0000269|PubMed:11311135, ECO:0000269|PubMed:11389679, ECO:0000269|PubMed:11557028, ECO:0000269|PubMed:11564694, ECO:0000269|PubMed:12117417, ECO:0000269|PubMed:12225859, ECO:0000269|PubMed:15769744, ECO:0000269|PubMed:16496379, ECO:0000269|PubMed:2…	TRANSMEM 185..205; /note="Helical; Signal-anchor for type II membrane protein"; /evidence="ECO:0000269|PubMed:30867591"	36	57	4F2 cell-surface antigen heavy chain OS=Homo sapiens OX=9606 GN=SLC3A2 PE=1 SV=3 - [4F2_HUMAN]	31.75	1	17	17	66	5.58459e+08	4.41559e+08	2.47044e+08	96.3784	31.43	16	30	68.9729	29.05	13	20	49.7666	25.71	12	16	630	67.9517	5.0083
P62879	GBB2	Guanine nucleotide-binding protein G(I)/G(S)/G(T) subunit beta-2 (G protein subunit beta-2) (Transducin beta chain 2)	FUNCTION: Guanine nucleotide-binding proteins (G proteins) are involved as a modulator or transducer in various transmembrane signaling systems. The beta and gamma chains are required for the GTPase activity, for replacement of GDP by GTP, and for G protein-effector interaction.	G protein-coupled receptor signaling pathway [GO:0007186]; protein folding [GO:0006457]	cell body [GO:0044297]; cytosol [GO:0005829]; extracellular exosome [GO:0070062]; extracellular space [GO:0005615]; focal adhesion [GO:0005925]; lysosomal membrane [GO:0005765]; membrane [GO:0016020]; perinuclear region of cytoplasm [GO:0048471]; plasma membrane [GO:0005886]; protein-containing complex [GO:0032991]; vesicle [GO:0031982]	cell body [GO:0044297]; cytosol [GO:0005829]; extracellular exosome [GO:0070062]; extracellular space [GO:0005615]; focal adhesion [GO:0005925]; lysosomal membrane [GO:0005765]; membrane [GO:0016020]; perinuclear region of cytoplasm [GO:0048471]; plasma membrane [GO:0005886]; protein-containing complex [GO:0032991]; vesicle [GO:0031982]; calcium channel regulator activity [GO:0005246]; GTPase act…	calcium channel regulator activity [GO:0005246]; GTPase activity [GO:0003924]; GTPase binding [GO:0051020]; protein-containing complex binding [GO:0044877]	GO:0003924; GO:0005246; GO:0005615; GO:0005765; GO:0005829; GO:0005886; GO:0005925; GO:0006457; GO:0007186; GO:0016020; GO:0031982; GO:0032991; GO:0044297; GO:0044877; GO:0048471; GO:0051020; GO:0070062		SUBCELLULAR LOCATION: Cytoplasm, perinuclear region {ECO:0000269|PubMed:16498633}.		37	57	Guanine nucleotide-binding protein G(I)/G(S)/G(T) subunit beta-2 OS=Homo sapiens OX=9606 GN=GNB2 PE=1 SV=3 - [GBB2_HUMAN]	50.29	2	4	10	52	2.43008e+08	2.35342e+08	1.73032e+08	75.0618	33.82	7	19	60.4886	50.29	10	18	49.2108	44.41	8	15	340	37.3071	5.99854
P05023	AT1A1	Sodium/potassium-transporting ATPase subunit alpha-1 (Na(+)/K(+) ATPase alpha-1 subunit) (EC 7.2.2.13) (Sodium pump subunit alpha-1)	FUNCTION: This is the catalytic component of the active enzyme, which catalyzes the hydrolysis of ATP coupled with the exchange of sodium and potassium ions across the plasma membrane. This action creates the electrochemical gradient of sodium and potassium ions, providing the energy for active transport of various nutrients. {ECO:0000269|PubMed:29499166, ECO:0000269|PubMed:30388404}.	cardiac muscle cell action potential involved in contraction [GO:0086002]; cell communication by electrical coupling involved in cardiac conduction [GO:0086064]; cellular potassium ion homeostasis [GO:0030007]; cellular response to mechanical stimulus [GO:0071260]; cellular response to steroid hormone stimulus [GO:0071383]; cellular sodium ion homeostasis [GO:0006883]; ion transmembrane transport…	apical plasma membrane [GO:0016324]; basolateral plasma membrane [GO:0016323]; caveola [GO:0005901]; cell [GO:0005623]; endoplasmic reticulum [GO:0005783]; endosome [GO:0005768]; extracellular exosome [GO:0070062]; extracellular vesicle [GO:1903561]; Golgi apparatus [GO:0005794]; integral component of membrane [GO:0016021]; intercalated disc [GO:0014704]; lateral plasma membrane [GO:0016328]; mel…	apical plasma membrane [GO:0016324]; basolateral plasma membrane [GO:0016323]; caveola [GO:0005901]; cell [GO:0005623]; endoplasmic reticulum [GO:0005783]; endosome [GO:0005768]; extracellular exosome [GO:0070062]; extracellular vesicle [GO:1903561]; Golgi apparatus [GO:0005794]; integral component of membrane [GO:0016021]; intercalated disc [GO:0014704]; lateral plasma membrane [GO:0016328]; mel…	ADP binding [GO:0043531]; ankyrin binding [GO:0030506]; ATP binding [GO:0005524]; chaperone binding [GO:0051087]; phosphatase activity [GO:0016791]; phosphatidylinositol 3-kinase binding [GO:0043548]; potassium ion binding [GO:0030955]; protein domain specific binding [GO:0019904]; protein heterodimerization activity [GO:0046982]; protein kinase binding [GO:0019901]; sodium:potassium-exchanging A…	GO:0002026; GO:0002028; GO:0005391; GO:0005524; GO:0005623; GO:0005768; GO:0005783; GO:0005794; GO:0005886; GO:0005890; GO:0005901; GO:0006883; GO:0008217; GO:0014069; GO:0014704; GO:0016020; GO:0016021; GO:0016323; GO:0016324; GO:0016328; GO:0016791; GO:0019901; GO:0019904; GO:0030007; GO:0030315; GO:0030506; GO:0030955; GO:0031090; GO:0031402; GO:0031947; GO:0032991; GO:0034220; GO:0036126; GO:…		SUBCELLULAR LOCATION: Cell membrane, sarcolemma {ECO:0000269|PubMed:7711835}; Multi-pass membrane protein {ECO:0000255}. Melanosome {ECO:0000269|PubMed:17081065}. Note=Identified by mass spectrometry in melanosome fractions from stage I to stage IV. {ECO:0000269|PubMed:17081065}.	TRANSMEM 88..108; /note="Helical"; /evidence="ECO:0000255"; TRANSMEM 132..152; /note="Helical"; /evidence="ECO:0000255"; TRANSMEM 289..308; /note="Helical"; /evidence="ECO:0000255"; TRANSMEM 321..338; /note="Helical"; /evidence="ECO:0000255"; TRANSMEM 773..792; /note="Helical"; /evidence="ECO:0000255"; TRANSMEM 803..823; /note="Helical"; /evidence="ECO:0000255"; TRANSMEM 844..866; /note="Helical"…	38	57	Sodium/potassium-transporting ATPase subunit alpha-1 OS=Homo sapiens OX=9606 GN=ATP1A1 PE=1 SV=1 - [AT1A1_HUMAN]	39	6	34	34	124	3.38162e+08	2.92748e+08	2.32355e+08	136.86	35.97	28	44	121.503	31.38	26	40	115.802	29.23	25	40	1023	112.824	5.49072
P27348	1433T	14-3-3 protein theta (14-3-3 protein T-cell) (14-3-3 protein tau) (Protein HS1)	FUNCTION: Adapter protein implicated in the regulation of a large spectrum of both general and specialized signaling pathways. Binds to a large number of partners, usually by recognition of a phosphoserine or phosphothreonine motif. Binding generally results in the modulation of the activity of the binding partner. Negatively regulates the kinase activity of PDPK1. {ECO:0000269|PubMed:12177059}.	membrane organization [GO:0061024]; negative regulation of ion transmembrane transport [GO:0034766]; negative regulation of transcription, DNA-templated [GO:0045892]; positive regulation of protein insertion into mitochondrial membrane involved in apoptotic signaling pathway [GO:1900740]; protein targeting [GO:0006605]; small GTPase mediated signal transduction [GO:0007264]; substantia nigra deve…	cytoplasm [GO:0005737]; cytosol [GO:0005829]; extracellular exosome [GO:0070062]; focal adhesion [GO:0005925]; membrane [GO:0016020]; mitochondrion [GO:0005739]; protein-containing complex [GO:0032991]; synapse [GO:0045202]	cytoplasm [GO:0005737]; cytosol [GO:0005829]; extracellular exosome [GO:0070062]; focal adhesion [GO:0005925]; membrane [GO:0016020]; mitochondrion [GO:0005739]; protein-containing complex [GO:0032991]; synapse [GO:0045202]; 14-3-3 protein binding [GO:0071889]; identical protein binding [GO:0042802]; ion channel binding [GO:0044325]; protein C-terminus binding [GO:0008022]; protein domain specifi…	14-3-3 protein binding [GO:0071889]; identical protein binding [GO:0042802]; ion channel binding [GO:0044325]; protein C-terminus binding [GO:0008022]; protein domain specific binding [GO:0019904]; protein N-terminus binding [GO:0047485]	GO:0005737; GO:0005739; GO:0005829; GO:0005925; GO:0006605; GO:0007264; GO:0008022; GO:0016020; GO:0019904; GO:0021762; GO:0032991; GO:0034766; GO:0042802; GO:0044325; GO:0045202; GO:0045892; GO:0047485; GO:0061024; GO:0070062; GO:0071889; GO:1900740		SUBCELLULAR LOCATION: Cytoplasm. Note=In neurons, axonally transported to the nerve terminals.		39	56	14-3-3 protein theta OS=Homo sapiens OX=9606 GN=YWHAQ PE=1 SV=1 - [1433T_HUMAN]	68.98	1	11	16	125	4351406169	3.86827e+09	2.96144e+09	147.692	68.98	16	48	115.632	53.06	12	39	107.407	50.61	11	38	245	27.7468	4.77979
O00299	CLIC1	Chloride intracellular channel protein 1 (Chloride channel ABP) (Nuclear chloride ion channel 27) (NCC27) (Regulatory nuclear chloride ion channel protein) (hRNCC)	FUNCTION: Can insert into membranes and form chloride ion channels. Channel activity depends on the pH. Membrane insertion seems to be redox-regulated and may occur only under oxydizing conditions. Involved in regulation of the cell cycle. {ECO:0000269|PubMed:10834939, ECO:0000269|PubMed:11195932, ECO:0000269|PubMed:11551966, ECO:0000269|PubMed:11940526, ECO:0000269|PubMed:11978800, ECO:0000269|P…	chloride transport [GO:0006821]; platelet aggregation [GO:0070527]; positive regulation of osteoblast differentiation [GO:0045669]; regulation of cell cycle [GO:0051726]; regulation of ion transmembrane transport [GO:0034765]; regulation of mitochondrial membrane potential [GO:0051881]; signal transduction [GO:0007165]	blood microparticle [GO:0072562]; brush border [GO:0005903]; chloride channel complex [GO:0034707]; cytoplasm [GO:0005737]; extracellular exosome [GO:0070062]; extracellular space [GO:0005615]; membrane [GO:0016020]; mitochondrion [GO:0005739]; nuclear envelope [GO:0005635]; nuclear membrane [GO:0031965]; nucleus [GO:0005634]; perinuclear region of cytoplasm [GO:0048471]; plasma membrane [GO:0005…	blood microparticle [GO:0072562]; brush border [GO:0005903]; chloride channel complex [GO:0034707]; cytoplasm [GO:0005737]; extracellular exosome [GO:0070062]; extracellular space [GO:0005615]; membrane [GO:0016020]; mitochondrion [GO:0005739]; nuclear envelope [GO:0005635]; nuclear membrane [GO:0031965]; nucleus [GO:0005634]; perinuclear region of cytoplasm [GO:0048471]; plasma membrane [GO:0005…	cadherin binding [GO:0045296]; chloride channel activity [GO:0005254]; voltage-gated ion channel activity [GO:0005244]	GO:0005244; GO:0005254; GO:0005615; GO:0005634; GO:0005635; GO:0005737; GO:0005739; GO:0005886; GO:0005903; GO:0006821; GO:0007165; GO:0016020; GO:0031965; GO:0031982; GO:0034707; GO:0034765; GO:0045296; GO:0045669; GO:0048471; GO:0051726; GO:0051881; GO:0070062; GO:0070527; GO:0072562		SUBCELLULAR LOCATION: Nucleus {ECO:0000269|PubMed:12681486, ECO:0000269|PubMed:9139710}. Nucleus membrane {ECO:0000269|PubMed:9139710}; Single-pass membrane protein {ECO:0000255}. Cytoplasm {ECO:0000269|PubMed:10793131, ECO:0000269|PubMed:11551966, ECO:0000269|PubMed:12681486, ECO:0000269|PubMed:9139710, ECO:0000305|PubMed:11978800, ECO:0000305|PubMed:14613939}. Cell membrane {ECO:0000269|PubMed:…	TRANSMEM 26..46; /note="Helical; Note=After insertion into the membrane"; /evidence="ECO:0000255"	42	56	Chloride intracellular channel protein 1 OS=Homo sapiens OX=9606 GN=CLIC1 PE=1 SV=4 - [CLIC1_HUMAN]	80.5	1	19	19	148	2.3806e+09	2.03607e+09	1.464e+09	203.826	70.12	15	48	214.25	77.18	16	50	192.266	80.5	17	50	241	26.9057	5.17334
P78371	TCPB	T-complex protein 1 subunit beta (TCP-1-beta) (CCT-beta)	FUNCTION: Component of the chaperonin-containing T-complex (TRiC), a molecular chaperone complex that assists the folding of proteins upon ATP hydrolysis (PubMed:25467444). The TRiC complex mediates the folding of WRAP53/TCAB1, thereby regulating telomere maintenance (PubMed:25467444). As part of the TRiC complex may play a role in the assembly of BBSome, a complex involved in ciliogenesis regula…	binding of sperm to zona pellucida [GO:0007339]; chaperone-mediated protein complex assembly [GO:0051131]; chaperone mediated protein folding independent of cofactor [GO:0051086]; neutrophil degranulation [GO:0043312]; positive regulation of establishment of protein localization to telomere [GO:1904851]; positive regulation of protein localization to Cajal body [GO:1904871]; positive regulation o…	azurophil granule lumen [GO:0035578]; cell body [GO:0044297]; chaperonin-containing T-complex [GO:0005832]; cytosol [GO:0005829]; extracellular exosome [GO:0070062]; extracellular region [GO:0005576]; microtubule [GO:0005874]; zona pellucida receptor complex [GO:0002199]	azurophil granule lumen [GO:0035578]; cell body [GO:0044297]; chaperonin-containing T-complex [GO:0005832]; cytosol [GO:0005829]; extracellular exosome [GO:0070062]; extracellular region [GO:0005576]; microtubule [GO:0005874]; zona pellucida receptor complex [GO:0002199]; ATP binding [GO:0005524]; protein folding chaperone [GO:0044183]; ubiquitin protein ligase binding [GO:0031625]; unfolded prot…	ATP binding [GO:0005524]; protein folding chaperone [GO:0044183]; ubiquitin protein ligase binding [GO:0031625]; unfolded protein binding [GO:0051082]	GO:0002199; GO:0005524; GO:0005576; GO:0005829; GO:0005832; GO:0005874; GO:0006457; GO:0007339; GO:0031625; GO:0032212; GO:0035578; GO:0043312; GO:0044183; GO:0044297; GO:0050821; GO:0051082; GO:0051086; GO:0051131; GO:0051973; GO:0070062; GO:0090666; GO:1901998; GO:1904851; GO:1904871; GO:1904874		SUBCELLULAR LOCATION: Cytoplasm {ECO:0000269|PubMed:20080638}.		43	56	T-complex protein 1 subunit beta OS=Homo sapiens OX=9606 GN=CCT2 PE=1 SV=4 - [TCPB_HUMAN]	67.66	1	28	28	192	1.05901e+09	9.91929e+08	7.66015e+08	235.593	54.58	21	68	207.122	56.82	21	60	232.645	65.98	27	64	535	57.4521	6.45557
P60953	CDC42	Cell division control protein 42 homolog (EC 3.6.5.2) (G25K GTP-binding protein)	FUNCTION: Plasma membrane-associated small GTPase which cycles between an active GTP-bound and an inactive GDP-bound state. In active state binds to a variety of effector proteins to regulate cellular responses. Involved in epithelial cell polarization processes. Regulates the bipolar attachment of spindle microtubules to kinetochores before chromosome congression in metaphase (PubMed:15642749). …	actin cytoskeleton organization [GO:0030036]; actin filament branching [GO:0090135]; actin filament organization [GO:0007015]; adherens junction organization [GO:0034332]; blood coagulation [GO:0007596]; cardiac conduction system development [GO:0003161]; Cdc42 protein signal transduction [GO:0032488]; cell junction assembly [GO:0034329]; cell migration [GO:0016477]; cell projection assembly [GO:…	apical part of cell [GO:0045177]; cell [GO:0005623]; cell-cell junction [GO:0005911]; cell cortex [GO:0005938]; cell projection [GO:0042995]; cytoplasm [GO:0005737]; cytoplasmic ribonucleoprotein granule [GO:0036464]; cytoplasmic vesicle [GO:0031410]; cytoskeleton [GO:0005856]; cytosol [GO:0005829]; dendritic spine [GO:0043197]; endoplasmic reticulum membrane [GO:0005789]; extracellular exosome […	apical part of cell [GO:0045177]; cell [GO:0005623]; cell cortex [GO:0005938]; cell projection [GO:0042995]; cell-cell junction [GO:0005911]; cytoplasm [GO:0005737]; cytoplasmic ribonucleoprotein granule [GO:0036464]; cytoplasmic vesicle [GO:0031410]; cytoskeleton [GO:0005856]; cytosol [GO:0005829]; dendritic spine [GO:0043197]; endoplasmic reticulum membrane [GO:0005789]; extracellular exosome […	apolipoprotein A-I receptor binding [GO:0034191]; GBD domain binding [GO:0032427]; GTPase activity [GO:0003924]; GTP binding [GO:0005525]; GTP-dependent protein binding [GO:0030742]; identical protein binding [GO:0042802]; mitogen-activated protein kinase kinase kinase binding [GO:0031435]; protein kinase binding [GO:0019901]; thioesterase binding [GO:0031996]; ubiquitin protein ligase activity […	GO:0000139; GO:0000322; GO:0002040; GO:0003161; GO:0003924; GO:0005525; GO:0005623; GO:0005737; GO:0005789; GO:0005815; GO:0005829; GO:0005856; GO:0005886; GO:0005911; GO:0005925; GO:0005938; GO:0006897; GO:0006911; GO:0007015; GO:0007030; GO:0007088; GO:0007097; GO:0007163; GO:0007229; GO:0007266; GO:0007596; GO:0008360; GO:0010591; GO:0010592; GO:0016020; GO:0016477; GO:0017119; GO:0019901; GO:…		SUBCELLULAR LOCATION: Cell membrane {ECO:0000305}; Lipid-anchor {ECO:0000305}; Cytoplasmic side {ECO:0000305}. Cytoplasm, cytoskeleton, microtubule organizing center, centrosome {ECO:0000269|PubMed:15642749}. Cytoplasm, cytoskeleton, spindle {ECO:0000269|PubMed:15642749}. Midbody {ECO:0000269|PubMed:15642749}. Cell projection, dendrite {ECO:0000250|UniProtKB:P60766}. Note=Localizes to spindle dur…		44	55	Cell division control protein 42 homolog OS=Homo sapiens OX=9606 GN=CDC42 PE=1 SV=2 - [CDC42_HUMAN]	48.69	3	7	8	59	6.61556e+08	5.19442e+08	4.50824e+08	69.4793	48.69	8	20	67.5828	48.69	8	20	67.4928	42.93	7	19	191	21.245	6.55127
P61981	1433G	14-3-3 protein gamma (Protein kinase C inhibitor protein 1) (KCIP-1) [Cleaved into: 14-3-3 protein gamma, N-terminally processed]	FUNCTION: Adapter protein implicated in the regulation of a large spectrum of both general and specialized signaling pathways. Binds to a large number of partners, usually by recognition of a phosphoserine or phosphothreonine motif. Binding generally results in the modulation of the activity of the binding partner. {ECO:0000269|PubMed:16511572}.	cellular response to insulin stimulus [GO:0032869]; ciliary basal body-plasma membrane docking [GO:0097711]; G2/M transition of mitotic cell cycle [GO:0000086]; membrane organization [GO:0061024]; negative regulation of protein kinase activity [GO:0006469]; positive regulation of protein insertion into mitochondrial membrane involved in apoptotic signaling pathway [GO:1900740]; protein targeting …	cytosol [GO:0005829]; extracellular exosome [GO:0070062]; focal adhesion [GO:0005925]; membrane [GO:0016020]; mitochondrion [GO:0005739]; presynapse [GO:0098793]	cytosol [GO:0005829]; extracellular exosome [GO:0070062]; focal adhesion [GO:0005925]; membrane [GO:0016020]; mitochondrion [GO:0005739]; presynapse [GO:0098793]; identical protein binding [GO:0042802]; insulin-like growth factor receptor binding [GO:0005159]; protein domain specific binding [GO:0019904]; protein kinase C binding [GO:0005080]; protein kinase C inhibitor activity [GO:0008426]; rec…	identical protein binding [GO:0042802]; insulin-like growth factor receptor binding [GO:0005159]; protein domain specific binding [GO:0019904]; protein kinase C binding [GO:0005080]; protein kinase C inhibitor activity [GO:0008426]; receptor tyrosine kinase binding [GO:0030971]; RNA binding [GO:0003723]	GO:0000086; GO:0003723; GO:0005080; GO:0005159; GO:0005739; GO:0005829; GO:0005925; GO:0006469; GO:0006605; GO:0008426; GO:0009966; GO:0010389; GO:0016020; GO:0019904; GO:0030971; GO:0032869; GO:0042802; GO:0045664; GO:0048167; GO:0061024; GO:0070062; GO:0097711; GO:0098793; GO:1900740		SUBCELLULAR LOCATION: Cytoplasm {ECO:0000250}.		45	54	14-3-3 protein gamma OS=Homo sapiens OX=9606 GN=YWHAG PE=1 SV=2 - [1433G_HUMAN]	61.54	2	9	15	142	4.44533e+09	4.00576e+09	3.04151e+09	153.145	61.54	14	56	127.28	58.7	13	42	112.535	55.47	13	44	247	28.2849	4.89404
P01023	A2MG	Alpha-2-macroglobulin (Alpha-2-M) (C3 and PZP-like alpha-2-macroglobulin domain-containing protein 5)	FUNCTION: Is able to inhibit all four classes of proteinases by a unique 'trapping' mechanism. This protein has a peptide stretch, called the 'bait region' which contains specific cleavage sites for different proteinases. When a proteinase cleaves the bait region, a conformational change is induced in the protein which traps the proteinase. The entrapped enzyme remains active against low molecula…	blood coagulation, intrinsic pathway [GO:0007597]; extracellular matrix disassembly [GO:0022617]; negative regulation of complement activation, lectin pathway [GO:0001869]; platelet degranulation [GO:0002576]; regulation of small GTPase mediated signal transduction [GO:0051056]; stem cell differentiation [GO:0048863]	blood microparticle [GO:0072562]; collagen-containing extracellular matrix [GO:0062023]; cytosol [GO:0005829]; extracellular exosome [GO:0070062]; extracellular region [GO:0005576]; extracellular space [GO:0005615]; platelet alpha granule lumen [GO:0031093]	blood microparticle [GO:0072562]; collagen-containing extracellular matrix [GO:0062023]; cytosol [GO:0005829]; extracellular exosome [GO:0070062]; extracellular region [GO:0005576]; extracellular space [GO:0005615]; platelet alpha granule lumen [GO:0031093]; calcium-dependent protein binding [GO:0048306]; endopeptidase inhibitor activity [GO:0004866]; enzyme binding [GO:0019899]; growth factor bi…	calcium-dependent protein binding [GO:0048306]; endopeptidase inhibitor activity [GO:0004866]; enzyme binding [GO:0019899]; growth factor binding [GO:0019838]; interleukin-1 binding [GO:0019966]; interleukin-8 binding [GO:0019959]; protease binding [GO:0002020]; serine-type endopeptidase inhibitor activity [GO:0004867]; signaling receptor binding [GO:0005102]; tumor necrosis factor binding [GO:00…	GO:0001869; GO:0002020; GO:0002576; GO:0004866; GO:0004867; GO:0005102; GO:0005576; GO:0005615; GO:0005829; GO:0007597; GO:0019838; GO:0019899; GO:0019959; GO:0019966; GO:0022617; GO:0031093; GO:0043120; GO:0048306; GO:0048863; GO:0051056; GO:0062023; GO:0070062; GO:0072562		SUBCELLULAR LOCATION: Secreted {ECO:0000269|PubMed:6203908}.		46	54	Alpha-2-macroglobulin OS=Homo sapiens OX=9606 GN=A2M PE=1 SV=3 - [A2MG_HUMAN]	0.75	1	1	1	2	0	24500156	7.59157e+06		0			2.76589	0.75	1	1	2.67083	0.75	1	1	1474	163.188	6.45557
P68363	TBA1B	Tubulin alpha-1B chain (Alpha-tubulin ubiquitous) (Tubulin K-alpha-1) (Tubulin alpha-ubiquitous chain) [Cleaved into: Detyrosinated tubulin alpha-1B chain]	FUNCTION: Tubulin is the major constituent of microtubules. It binds two moles of GTP, one at an exchangeable site on the beta chain and one at a non-exchangeable site on the alpha chain.	cell division [GO:0051301]; cellular response to interleukin-4 [GO:0071353]; cytoskeleton-dependent intracellular transport [GO:0030705]; microtubule-based process [GO:0007017]; microtubule cytoskeleton organization [GO:0000226]; mitotic cell cycle [GO:0000278]	cytoplasm [GO:0005737]; cytoplasmic microtubule [GO:0005881]; membrane raft [GO:0045121]; microtubule [GO:0005874]; microtubule cytoskeleton [GO:0015630]	cytoplasm [GO:0005737]; cytoplasmic microtubule [GO:0005881]; membrane raft [GO:0045121]; microtubule [GO:0005874]; microtubule cytoskeleton [GO:0015630]; double-stranded RNA binding [GO:0003725]; GTP binding [GO:0005525]; GTPase activity [GO:0003924]; structural constituent of cytoskeleton [GO:0005200]; structural molecule activity [GO:0005198]; ubiquitin protein ligase binding [GO:0031625]; cel…	double-stranded RNA binding [GO:0003725]; GTPase activity [GO:0003924]; GTP binding [GO:0005525]; structural constituent of cytoskeleton [GO:0005200]; structural molecule activity [GO:0005198]; ubiquitin protein ligase binding [GO:0031625]	GO:0000226; GO:0000278; GO:0003725; GO:0003924; GO:0005198; GO:0005200; GO:0005525; GO:0005737; GO:0005874; GO:0005881; GO:0007017; GO:0015630; GO:0030705; GO:0031625; GO:0045121; GO:0051301; GO:0071353		SUBCELLULAR LOCATION: Cytoplasm, cytoskeleton.		47	53	Tubulin alpha-1B chain OS=Homo sapiens OX=9606 GN=TUBA1B PE=1 SV=1 - [TBA1B_HUMAN]	65.19	3	1	27	370	5.78453e+09	5400415362	4.46395e+09	451.318	64.52	24	121	460.79	60.75	25	127	458.647	65.19	27	122	451	50.1196	5.05908
P63000	RAC1	Ras-related C3 botulinum toxin substrate 1 (EC 3.6.5.2) (Cell migration-inducing gene 5 protein) (Ras-like protein TC25) (p21-Rac1)	FUNCTION: Plasma membrane-associated small GTPase which cycles between active GTP-bound and inactive GDP-bound states. In its active state, binds to a variety of effector proteins to regulate cellular responses such as secretory processes, phagocytosis of apoptotic cells, epithelial cell polarization, neurons adhesion, migration and differentiation, and growth-factor induced formation of membrane…	actin cytoskeleton organization [GO:0030036]; actin filament organization [GO:0007015]; actin filament polymerization [GO:0030041]; anatomical structure morphogenesis [GO:0009653]; blood coagulation [GO:0007596]; bone resorption [GO:0045453]; cell adhesion [GO:0007155]; cell-matrix adhesion [GO:0007160]; cell motility [GO:0048870]; cell population proliferation [GO:0008283]; cell projection assem…	cell cortex [GO:0005938]; cell projection [GO:0042995]; cytoplasm [GO:0005737]; cytoplasmic ribonucleoprotein granule [GO:0036464]; cytoplasmic vesicle [GO:0031410]; cytoskeleton [GO:0005856]; cytosol [GO:0005829]; dendritic spine [GO:0043197]; endoplasmic reticulum membrane [GO:0005789]; extracellular exosome [GO:0070062]; ficolin-1-rich granule membrane [GO:0101003]; focal adhesion [GO:0005925]…	cell cortex [GO:0005938]; cell projection [GO:0042995]; cytoplasm [GO:0005737]; cytoplasmic ribonucleoprotein granule [GO:0036464]; cytoplasmic vesicle [GO:0031410]; cytoskeleton [GO:0005856]; cytosol [GO:0005829]; dendritic spine [GO:0043197]; endoplasmic reticulum membrane [GO:0005789]; extracellular exosome [GO:0070062]; ficolin-1-rich granule membrane [GO:0101003]; focal adhesion [GO:0005925]…	ATPase binding [GO:0051117]; enzyme binding [GO:0019899]; GTPase activity [GO:0003924]; GTP binding [GO:0005525]; histone deacetylase binding [GO:0042826]; protein-containing complex binding [GO:0044877]; protein kinase binding [GO:0019901]; Rab GTPase binding [GO:0017137]; Rho GDP-dissociation inhibitor binding [GO:0051022]; thioesterase binding [GO:0031996]	GO:0000139; GO:0001764; GO:0001934; GO:0002551; GO:0003924; GO:0005525; GO:0005737; GO:0005789; GO:0005802; GO:0005829; GO:0005856; GO:0005886; GO:0005925; GO:0005938; GO:0006954; GO:0007015; GO:0007155; GO:0007160; GO:0007163; GO:0007266; GO:0007596; GO:0008045; GO:0008283; GO:0008360; GO:0008361; GO:0009611; GO:0009653; GO:0010310; GO:0010591; GO:0010592; GO:0010811; GO:0016020; GO:0016601; GO:…		SUBCELLULAR LOCATION: Cell membrane {ECO:0000269|PubMed:1643658}; Lipid-anchor {ECO:0000269|PubMed:1903399}; Cytoplasmic side {ECO:0000269|PubMed:1643658, ECO:0000269|PubMed:19948726}. Melanosome {ECO:0000269|PubMed:17081065, ECO:0000269|PubMed:19948726, ECO:0000269|PubMed:21693584}. Cytoplasm {ECO:0000269|PubMed:19948726}. Cell projection, lamellipodium {ECO:0000250|UniProtKB:P63001}. Note=Inner…		48	53	Ras-related C3 botulinum toxin substrate 1 OS=Homo sapiens OX=9606 GN=RAC1 PE=1 SV=1 - [RAC1_HUMAN]	44.27	4	5	9	31	7.62211e+08	5.72043e+08	5.28581e+08	17.9762	31.77	6	7	34.8605	44.27	9	13	27.0567	36.98	8	11	192	21.4362	8.49951
Q08380	LG3BP	Galectin-3-binding protein (Basement membrane autoantigen p105) (Lectin galactoside-binding soluble 3-binding protein) (Mac-2-binding protein) (MAC2BP) (Mac-2 BP) (Tumor-associated antigen 90K)	FUNCTION: Promotes integrin-mediated cell adhesion. May stimulate host defense against viruses and tumor cells. {ECO:0000269|PubMed:11146440, ECO:0000269|PubMed:8034587, ECO:0000269|PubMed:9501082}.	cell adhesion [GO:0007155]; cellular defense response [GO:0006968]; platelet degranulation [GO:0002576]; signal transduction [GO:0007165]	blood microparticle [GO:0072562]; collagen-containing extracellular matrix [GO:0062023]; extracellular exosome [GO:0070062]; extracellular region [GO:0005576]; extracellular space [GO:0005615]; membrane [GO:0016020]; platelet dense granule lumen [GO:0031089]	blood microparticle [GO:0072562]; collagen-containing extracellular matrix [GO:0062023]; extracellular exosome [GO:0070062]; extracellular region [GO:0005576]; extracellular space [GO:0005615]; membrane [GO:0016020]; platelet dense granule lumen [GO:0031089]; scavenger receptor activity [GO:0005044]; cell adhesion [GO:0007155]; cellular defense response [GO:0006968]; platelet degranulation [GO:00…	scavenger receptor activity [GO:0005044]	GO:0002576; GO:0005044; GO:0005576; GO:0005615; GO:0006968; GO:0007155; GO:0007165; GO:0016020; GO:0031089; GO:0062023; GO:0070062; GO:0072562		SUBCELLULAR LOCATION: Secreted {ECO:0000269|PubMed:8390986}. Secreted, extracellular space, extracellular matrix {ECO:0000269|PubMed:9501082}.		49	53	Galectin-3-binding protein OS=Homo sapiens OX=9606 GN=LGALS3BP PE=1 SV=1 - [LG3BP_HUMAN]	15.04	1	5	5	9	0	3.17434e+07	2.91193e+07	2.52262	3.59	1	1	11.5192	15.04	5	5	8.02272	8.72	3	3	585	65.2893	5.2749
P04899	GNAI2	Guanine nucleotide-binding protein G(i) subunit alpha-2 (Adenylate cyclase-inhibiting G alpha protein)	FUNCTION: Guanine nucleotide-binding proteins (G proteins) are involved as modulators or transducers in various transmembrane signaling systems. The G(i) proteins are involved in hormonal regulation of adenylate cyclase: they inhibit the cyclase in response to beta-adrenergic stimuli. May play a role in cell division. {ECO:0000269|PubMed:17635935}.; FUNCTION: [Isoform sGi2]: Regulates the cell su…	adenosine receptor signaling pathway [GO:0001973]; adenylate cyclase-activating G protein-coupled receptor signaling pathway [GO:0007189]; adenylate cyclase-inhibiting G protein-coupled receptor signaling pathway [GO:0007193]; adenylate cyclase-modulating G protein-coupled receptor signaling pathway [GO:0007188]; cell cycle [GO:0007049]; cell division [GO:0051301]; cell population proliferation […	cell body [GO:0044297]; centrosome [GO:0005813]; cytoplasm [GO:0005737]; cytosol [GO:0005829]; dendrite [GO:0030425]; extracellular exosome [GO:0070062]; extracellular vesicle [GO:1903561]; heterotrimeric G-protein complex [GO:0005834]; membrane [GO:0016020]; membrane raft [GO:0045121]; midbody [GO:0030496]; nucleoplasm [GO:0005654]; plasma membrane [GO:0005886]; synapse [GO:0045202]	cell body [GO:0044297]; centrosome [GO:0005813]; cytoplasm [GO:0005737]; cytosol [GO:0005829]; dendrite [GO:0030425]; extracellular exosome [GO:0070062]; extracellular vesicle [GO:1903561]; heterotrimeric G-protein complex [GO:0005834]; membrane [GO:0016020]; membrane raft [GO:0045121]; midbody [GO:0030496]; nucleoplasm [GO:0005654]; plasma membrane [GO:0005886]; synapse [GO:0045202]; G protein-c…	G-protein beta/gamma-subunit complex binding [GO:0031683]; G protein-coupled receptor binding [GO:0001664]; GTPase activity [GO:0003924]; GTP binding [GO:0005525]; metal ion binding [GO:0046872]	GO:0001664; GO:0001973; GO:0003924; GO:0005525; GO:0005654; GO:0005737; GO:0005813; GO:0005829; GO:0005834; GO:0005886; GO:0006457; GO:0007049; GO:0007165; GO:0007186; GO:0007188; GO:0007189; GO:0007193; GO:0007194; GO:0007213; GO:0007214; GO:0007584; GO:0008283; GO:0008284; GO:0016020; GO:0030335; GO:0030425; GO:0030496; GO:0031683; GO:0032930; GO:0033864; GO:0035810; GO:0035815; GO:0044297; GO:…		SUBCELLULAR LOCATION: Cytoplasm {ECO:0000269|PubMed:17635935}. Cytoplasm, cytoskeleton, microtubule organizing center, centrosome {ECO:0000269|PubMed:17635935}. Cell membrane {ECO:0000269|PubMed:17635935}. Membrane {ECO:0000305}; Lipid-anchor {ECO:0000305}. Note=Localizes in the centrosomes of interphase and mitotic cells. Detected at the cleavage furrow and/or the midbody.		50	53	Guanine nucleotide-binding protein G(i) subunit alpha-2 OS=Homo sapiens OX=9606 GN=GNAI2 PE=1 SV=3 - [GNAI2_HUMAN]	56.06	8	13	18	91	4.32347e+08	3.51227e+08	3.11413e+08	110.71	54.93	15	30	113.589	50.99	16	31	116.33	48.73	16	30	355	40.4251	5.5415
P04083	ANXA1	Annexin A1 (Annexin I) (Annexin-1) (Calpactin II) (Calpactin-2) (Chromobindin-9) (Lipocortin I) (Phospholipase A2 inhibitory protein) (p35)	FUNCTION: Plays important roles in the innate immune response as effector of glucocorticoid-mediated responses and regulator of the inflammatory process. Has anti-inflammatory activity (PubMed:8425544). Plays a role in glucocorticoid-mediated down-regulation of the early phase of the inflammatory response (By similarity). Promotes resolution of inflammation and wound healing (PubMed:25664854). Fu…	actin cytoskeleton reorganization [GO:0031532]; adaptive immune response [GO:0002250]; alpha-beta T cell differentiation [GO:0046632]; arachidonic acid secretion [GO:0050482]; cell surface receptor signaling pathway [GO:0007166]; cellular response to glucocorticoid stimulus [GO:0071385]; cellular response to hydrogen peroxide [GO:0070301]; cellular response to vascular endothelial growth factor s…	adherens junction [GO:0005912]; apical plasma membrane [GO:0016324]; basolateral plasma membrane [GO:0016323]; cell surface [GO:0009986]; collagen-containing extracellular matrix [GO:0062023]; cornified envelope [GO:0001533]; cytoplasm [GO:0005737]; cytoplasmic vesicle membrane [GO:0030659]; cytosol [GO:0005829]; early endosome membrane [GO:0031901]; endosome [GO:0005768]; extracellular exosome […	adherens junction [GO:0005912]; apical plasma membrane [GO:0016324]; basolateral plasma membrane [GO:0016323]; cell surface [GO:0009986]; collagen-containing extracellular matrix [GO:0062023]; cornified envelope [GO:0001533]; cytoplasm [GO:0005737]; cytoplasmic vesicle membrane [GO:0030659]; cytosol [GO:0005829]; early endosome membrane [GO:0031901]; endosome [GO:0005768]; extracellular exosome […	cadherin binding involved in cell-cell adhesion [GO:0098641]; calcium-dependent phospholipid binding [GO:0005544]; calcium-dependent protein binding [GO:0048306]; calcium ion binding [GO:0005509]; DNA/DNA annealing activity [GO:1990814]; double-stranded DNA helicase activity [GO:0036121]; identical protein binding [GO:0042802]; phospholipase A2 inhibitor activity [GO:0019834]; phospholipid bindin…	GO:0001533; GO:0001780; GO:0001891; GO:0002250; GO:0002548; GO:0002685; GO:0003697; GO:0003727; GO:0005102; GO:0005509; GO:0005543; GO:0005544; GO:0005576; GO:0005615; GO:0005634; GO:0005654; GO:0005737; GO:0005768; GO:0005829; GO:0005886; GO:0005912; GO:0005925; GO:0006909; GO:0006954; GO:0007165; GO:0007166; GO:0007186; GO:0007187; GO:0008360; GO:0009986; GO:0010165; GO:0014839; GO:0016323; GO:…		SUBCELLULAR LOCATION: Nucleus {ECO:0000269|PubMed:10772777, ECO:0000269|PubMed:19625660}. Cytoplasm {ECO:0000269|PubMed:10772777, ECO:0000269|PubMed:17008549, ECO:0000269|PubMed:19625660}. Cell projection, cilium {ECO:0000250|UniProtKB:P46193}. Cell membrane {ECO:0000269|PubMed:10772777}. Membrane {ECO:0000269|PubMed:17008549, ECO:0000269|PubMed:2532504, ECO:0000269|PubMed:8557678}; Peripheral me…		51	53	Annexin A1 OS=Homo sapiens OX=9606 GN=ANXA1 PE=1 SV=2 - [ANXA1_HUMAN]	65.9	1	21	21	101	4.19758e+08	4.60995e+08	3.88877e+08	81.3077	57.51	17	31	105.629	61.27	18	35	114.543	55.78	17	35	346	38.69	7.02002
P61586	RHOA	Transforming protein RhoA (EC 3.6.5.2) (Rho cDNA clone 12) (h12)	FUNCTION: Small GTPase which cycles between an active GTP-bound and an inactive GDP-bound state. Mainly associated with cytoskeleton organization, in active state binds to a variety of effector proteins to regulate cellular responses such cytoskeletal dynamics, cell migration and cell cycle. Regulates a signal transduction pathway linking plasma membrane receptors to the assembly of focal adhesio…	actin cytoskeleton organization [GO:0030036]; actin cytoskeleton reorganization [GO:0031532]; actin filament bundle assembly [GO:0051017]; actin filament organization [GO:0007015]; alpha-beta T cell lineage commitment [GO:0002363]; androgen receptor signaling pathway [GO:0030521]; angiotensin-mediated vasoconstriction involved in regulation of systemic arterial blood pressure [GO:0001998]; apical…	apical junction complex [GO:0043296]; axon [GO:0030424]; cell cortex [GO:0005938]; cell division site [GO:0032153]; cell junction [GO:0030054]; cell periphery [GO:0071944]; cleavage furrow [GO:0032154]; cytoplasm [GO:0005737]; cytoplasmic vesicle [GO:0031410]; cytoskeleton [GO:0005856]; cytosol [GO:0005829]; dendritic spine [GO:0043197]; endoplasmic reticulum membrane [GO:0005789]; endosome [GO:0…	apical junction complex [GO:0043296]; axon [GO:0030424]; cell cortex [GO:0005938]; cell division site [GO:0032153]; cell junction [GO:0030054]; cell periphery [GO:0071944]; cleavage furrow [GO:0032154]; cytoplasm [GO:0005737]; cytoplasmic vesicle [GO:0031410]; cytoskeleton [GO:0005856]; cytosol [GO:0005829]; dendritic spine [GO:0043197]; endoplasmic reticulum membrane [GO:0005789]; endosome [GO:0…	GDP binding [GO:0019003]; GTPase activity [GO:0003924]; GTP binding [GO:0005525]; myosin binding [GO:0017022]; protein domain specific binding [GO:0019904]; protein kinase binding [GO:0019901]; Rho GDP-dissociation inhibitor binding [GO:0051022]	GO:0001666; GO:0001998; GO:0002363; GO:0003100; GO:0003924; GO:0005525; GO:0005634; GO:0005737; GO:0005768; GO:0005789; GO:0005829; GO:0005856; GO:0005886; GO:0005925; GO:0005938; GO:0006357; GO:0007015; GO:0007160; GO:0007163; GO:0007179; GO:0007186; GO:0007266; GO:0007519; GO:0008360; GO:0009612; GO:0009749; GO:0010812; GO:0016032; GO:0016477; GO:0016579; GO:0017022; GO:0019003; GO:0019901; GO:…		SUBCELLULAR LOCATION: Cell membrane; Lipid-anchor; Cytoplasmic side. Cytoplasm, cytoskeleton. Cleavage furrow. Cytoplasm, cell cortex {ECO:0000269|PubMed:9635436}. Midbody. Cell projection, lamellipodium {ECO:0000250|UniProtKB:Q9QUI0}. Cell projection, dendrite {ECO:0000250|UniProtKB:Q9QUI0}. Note=Localized to cell-cell contacts in calcium-treated keratinocytes (By similarity). Translocates to th…		52	52	Transforming protein RhoA OS=Homo sapiens OX=9606 GN=RHOA PE=1 SV=1 - [RHOA_HUMAN]	67.88	2	5	12	73	5.48753e+08	4.82636e+08	4.12402e+08	72.2131	60.62	10	27	72.8086	47.67	10	23	66.7989	51.3	9	23	193	21.7541	6.1001
P32119	PRDX2	Peroxiredoxin-2 (EC 1.11.1.15) (Natural killer cell-enhancing factor B) (NKEF-B) (PRP) (Thiol-specific antioxidant protein) (TSA) (Thioredoxin peroxidase 1) (Thioredoxin-dependent peroxide reductase 1)	FUNCTION: Thiol-specific peroxidase that catalyzes the reduction of hydrogen peroxide and organic hydroperoxides to water and alcohols, respectively. Plays a role in cell protection against oxidative stress by detoxifying peroxides and as sensor of hydrogen peroxide-mediated signaling events. Might participate in the signaling cascades of growth factors and tumor necrosis factor-alpha by regulati…	activation of MAPK activity [GO:0000187]; cell redox homeostasis [GO:0045454]; cellular response to oxidative stress [GO:0034599]; homeostasis of number of cells [GO:0048872]; hydrogen peroxide catabolic process [GO:0042744]; leukocyte activation [GO:0045321]; negative regulation of apoptotic process [GO:0043066]; negative regulation of extrinsic apoptotic signaling pathway in absence of ligand […	cell [GO:0005623]; cytoplasm [GO:0005737]; cytosol [GO:0005829]; extracellular exosome [GO:0070062]	cell [GO:0005623]; cytoplasm [GO:0005737]; cytosol [GO:0005829]; extracellular exosome [GO:0070062]; antioxidant activity [GO:0016209]; thioredoxin peroxidase activity [GO:0008379]; activation of MAPK activity [GO:0000187]; cell redox homeostasis [GO:0045454]; cellular response to oxidative stress [GO:0034599]; homeostasis of number of cells [GO:0048872]; hydrogen peroxide catabolic process [GO:0…	antioxidant activity [GO:0016209]; thioredoxin peroxidase activity [GO:0008379]	GO:0000187; GO:0002536; GO:0005623; GO:0005737; GO:0005829; GO:0006979; GO:0008379; GO:0010310; GO:0016209; GO:0019430; GO:0030194; GO:0031665; GO:0032088; GO:0032496; GO:0034599; GO:0042098; GO:0042744; GO:0042981; GO:0043066; GO:0045321; GO:0045454; GO:0045581; GO:0048538; GO:0048872; GO:0070062; GO:2001240		SUBCELLULAR LOCATION: Cytoplasm {ECO:0000269|PubMed:9497357}.		54	51	Peroxiredoxin-2 OS=Homo sapiens OX=9606 GN=PRDX2 PE=1 SV=5 - [PRDX2_HUMAN]	50.51	1	8	9	52	2.05839e+09	2.07274e+09	2.0302e+09	55.9403	50.51	9	20	48.5873	45.96	8	16	39.3968	41.41	7	16	198	21.8782	5.97314
P50395	GDIB	Rab GDP dissociation inhibitor beta (Rab GDI beta) (Guanosine diphosphate dissociation inhibitor 2) (GDI-2)	FUNCTION: Regulates the GDP/GTP exchange reaction of most Rab proteins by inhibiting the dissociation of GDP from them, and the subsequent binding of GTP to them.	neutrophil degranulation [GO:0043312]; protein transport [GO:0015031]; regulation of small GTPase mediated signal transduction [GO:0051056]; signal transduction [GO:0007165]; small GTPase mediated signal transduction [GO:0007264]; vesicle-mediated transport [GO:0016192]	azurophil granule lumen [GO:0035578]; cytoplasm [GO:0005737]; cytosol [GO:0005829]; extracellular exosome [GO:0070062]; extracellular region [GO:0005576]; focal adhesion [GO:0005925]; Golgi apparatus [GO:0005794]; membrane [GO:0016020]; secretory granule lumen [GO:0034774]; synapse [GO:0045202]; vesicle [GO:0031982]	azurophil granule lumen [GO:0035578]; cytoplasm [GO:0005737]; cytosol [GO:0005829]; extracellular exosome [GO:0070062]; extracellular region [GO:0005576]; focal adhesion [GO:0005925]; Golgi apparatus [GO:0005794]; membrane [GO:0016020]; secretory granule lumen [GO:0034774]; synapse [GO:0045202]; vesicle [GO:0031982]; GTPase activator activity [GO:0005096]; Rab GDP-dissociation inhibitor activity …	GTPase activator activity [GO:0005096]; Rab GDP-dissociation inhibitor activity [GO:0005093]; Rab GTPase binding [GO:0017137]; RNA binding [GO:0003723]	GO:0003723; GO:0005093; GO:0005096; GO:0005576; GO:0005737; GO:0005794; GO:0005829; GO:0005925; GO:0007165; GO:0007264; GO:0015031; GO:0016020; GO:0016192; GO:0017137; GO:0031982; GO:0034774; GO:0035578; GO:0043312; GO:0045202; GO:0051056; GO:0070062		SUBCELLULAR LOCATION: Cytoplasm {ECO:0000250}. Membrane {ECO:0000250}; Peripheral membrane protein {ECO:0000250}.		55	51	Rab GDP dissociation inhibitor beta OS=Homo sapiens OX=9606 GN=GDI2 PE=1 SV=2 - [GDIB_HUMAN]	68.09	1	22	28	180	1.18342e+09	1.15301e+09	8.74624e+08	193.2	57.08	20	58	182.703	58.43	21	59	203.117	63.82	25	63	445	50.6309	6.46826
Q9H223	EHD4	EH domain-containing protein 4 (Hepatocellular carcinoma-associated protein 10/11) (PAST homolog 4)	FUNCTION: ATP- and membrane-binding protein that probably controls membrane reorganization/tubulation upon ATP hydrolysis. Plays a role in early endosomal transport. {ECO:0000269|PubMed:17233914, ECO:0000269|PubMed:18331452}.	cellular response to growth factor stimulus [GO:0071363]; endocytic recycling [GO:0032456]; pinocytosis [GO:0006907]; positive regulation of peptidyl-tyrosine phosphorylation [GO:0050731]; protein homooligomerization [GO:0051260]; regulation of endocytosis [GO:0030100]	early endosome membrane [GO:0031901]; endoplasmic reticulum [GO:0005783]; extracellular exosome [GO:0070062]; membrane [GO:0016020]; nucleus [GO:0005634]; perinuclear region of cytoplasm [GO:0048471]; plasma membrane [GO:0005886]; recycling endosome membrane [GO:0055038]	early endosome membrane [GO:0031901]; endoplasmic reticulum [GO:0005783]; extracellular exosome [GO:0070062]; membrane [GO:0016020]; nucleus [GO:0005634]; perinuclear region of cytoplasm [GO:0048471]; plasma membrane [GO:0005886]; recycling endosome membrane [GO:0055038]; ATP binding [GO:0005524]; cadherin binding [GO:0045296]; calcium ion binding [GO:0005509]; GTP binding [GO:0005525]; nucleic a…	ATP binding [GO:0005524]; cadherin binding [GO:0045296]; calcium ion binding [GO:0005509]; GTP binding [GO:0005525]; nucleic acid binding [GO:0003676]	GO:0003676; GO:0005509; GO:0005524; GO:0005525; GO:0005634; GO:0005783; GO:0005886; GO:0006907; GO:0016020; GO:0030100; GO:0031901; GO:0032456; GO:0045296; GO:0048471; GO:0050731; GO:0051260; GO:0055038; GO:0070062; GO:0071363		SUBCELLULAR LOCATION: Early endosome membrane {ECO:0000269|PubMed:18331452}; Peripheral membrane protein {ECO:0000305}; Cytoplasmic side {ECO:0000305}. Recycling endosome membrane {ECO:0000269|PubMed:18331452}; Peripheral membrane protein {ECO:0000305}; Cytoplasmic side {ECO:0000305}. Cell membrane {ECO:0000250|UniProtKB:Q9EQP2}; Peripheral membrane protein {ECO:0000305}; Cytoplasmic side {ECO:00…		56	51	EH domain-containing protein 4 OS=Homo sapiens OX=9606 GN=EHD4 PE=1 SV=1 - [EHD4_HUMAN]	52.31	1	16	19	75	2.2257e+08	2.23812e+08	1.98588e+08	75.2053	43.44	15	23	96.7593	50.83	18	30	68.8504	40.85	14	22	541	61.1365	6.75635
O43707	ACTN4	Alpha-actinin-4 (Non-muscle alpha-actinin 4)	FUNCTION: F-actin cross-linking protein which is thought to anchor actin to a variety of intracellular structures. This is a bundling protein (Probable). Probably involved in vesicular trafficking via its association with the CART complex. The CART complex is necessary for efficient transferrin receptor recycling but not for EGFR degradation (PubMed:15772161). Involved in tight junction assembly …	actin filament bundle assembly [GO:0051017]; bicellular tight junction assembly [GO:0070830]; negative regulation of cellular component movement [GO:0051271]; negative regulation of substrate adhesion-dependent cell spreading [GO:1900025]; peroxisome proliferator activated receptor signaling pathway [GO:0035357]; platelet degranulation [GO:0002576]; positive regulation of cell migration [GO:00303…	brush border [GO:0005903]; cell [GO:0005623]; cell-cell junction [GO:0005911]; cortical cytoskeleton [GO:0030863]; cytoplasm [GO:0005737]; cytosol [GO:0005829]; extracellular exosome [GO:0070062]; extracellular region [GO:0005576]; extracellular space [GO:0005615]; focal adhesion [GO:0005925]; neuron projection [GO:0043005]; nuclear body [GO:0016604]; nucleus [GO:0005634]; perinuclear region of c…	brush border [GO:0005903]; cell [GO:0005623]; cell-cell junction [GO:0005911]; cortical cytoskeleton [GO:0030863]; cytoplasm [GO:0005737]; cytosol [GO:0005829]; extracellular exosome [GO:0070062]; extracellular region [GO:0005576]; extracellular space [GO:0005615]; focal adhesion [GO:0005925]; neuron projection [GO:0043005]; nuclear body [GO:0016604]; nucleus [GO:0005634]; perinuclear region of c…	actin binding [GO:0003779]; actin filament binding [GO:0051015]; calcium ion binding [GO:0005509]; chromatin DNA binding [GO:0031490]; integrin binding [GO:0005178]; ion channel binding [GO:0044325]; nuclear hormone receptor binding [GO:0035257]; nuclear receptor transcription coactivator activity [GO:0030374]; nucleoside binding [GO:0001882]; protein homodimerization activity [GO:0042803]; prote…	GO:0000977; GO:0001666; GO:0001725; GO:0001882; GO:0002576; GO:0003713; GO:0003723; GO:0003779; GO:0005178; GO:0005509; GO:0005576; GO:0005615; GO:0005623; GO:0005634; GO:0005737; GO:0005829; GO:0005903; GO:0005911; GO:0005925; GO:0015031; GO:0016604; GO:0030018; GO:0030050; GO:0030335; GO:0030374; GO:0030863; GO:0031093; GO:0031143; GO:0031490; GO:0032417; GO:0032991; GO:0033209; GO:0035257; GO:…		SUBCELLULAR LOCATION: Nucleus {ECO:0000269|PubMed:22351778, ECO:0000269|PubMed:9508771}. Cytoplasm {ECO:0000269|PubMed:22351778, ECO:0000269|PubMed:9508771}. Cell junction {ECO:0000250|UniProtKB:P57780}. Cytoplasm, cytoskeleton, stress fiber {ECO:0000269|PubMed:9508771}. Note=Localized in cytoplasmic mRNP granules containing untranslated mRNAs. Nuclear translocation can be induced by the PI3 kina…		57	51	Alpha-actinin-4 OS=Homo sapiens OX=9606 GN=ACTN4 PE=1 SV=2 - [ACTN4_HUMAN]	63.78	2	29	46	303	1.01897e+09	1.10431e+09	8.85778e+08	290.07	58.84	40	96	310.977	55.21	41	98	318.131	59.82	43	109	911	104.788	5.43994
P31946	1433B	14-3-3 protein beta/alpha (Protein 1054) (Protein kinase C inhibitor protein 1) (KCIP-1) [Cleaved into: 14-3-3 protein beta/alpha, N-terminally processed]	FUNCTION: Adapter protein implicated in the regulation of a large spectrum of both general and specialized signaling pathways. Binds to a large number of partners, usually by recognition of a phosphoserine or phosphothreonine motif. Binding generally results in the modulation of the activity of the binding partner. Negative regulator of osteogenesis. Blocks the nuclear translocation of the phosph…	cytoplasmic sequestering of protein [GO:0051220]; hippo signaling [GO:0035329]; MAPK cascade [GO:0000165]; membrane organization [GO:0061024]; negative regulation of G protein-coupled receptor signaling pathway [GO:0045744]; negative regulation of protein dephosphorylation [GO:0035308]; negative regulation of transcription, DNA-templated [GO:0045892]; positive regulation of catalytic activity [GO…	cytoplasm [GO:0005737]; cytosol [GO:0005829]; extracellular exosome [GO:0070062]; focal adhesion [GO:0005925]; melanosome [GO:0042470]; membrane [GO:0016020]; mitochondrion [GO:0005739]; nucleus [GO:0005634]; perinuclear region of cytoplasm [GO:0048471]; transcriptional repressor complex [GO:0017053]; vacuolar membrane [GO:0005774]	cytoplasm [GO:0005737]; cytosol [GO:0005829]; extracellular exosome [GO:0070062]; focal adhesion [GO:0005925]; melanosome [GO:0042470]; membrane [GO:0016020]; mitochondrion [GO:0005739]; nucleus [GO:0005634]; perinuclear region of cytoplasm [GO:0048471]; transcriptional repressor complex [GO:0017053]; vacuolar membrane [GO:0005774]; cadherin binding [GO:0045296]; enzyme binding [GO:0019899]; hist…	cadherin binding [GO:0045296]; enzyme binding [GO:0019899]; histone deacetylase binding [GO:0042826]; identical protein binding [GO:0042802]; phosphoprotein binding [GO:0051219]; phosphoserine residue binding [GO:0050815]; protein-containing complex binding [GO:0044877]; protein C-terminus binding [GO:0008022]; protein domain specific binding [GO:0019904]	GO:0000165; GO:0005634; GO:0005737; GO:0005739; GO:0005774; GO:0005829; GO:0005925; GO:0006605; GO:0008022; GO:0016020; GO:0016032; GO:0017053; GO:0019899; GO:0019904; GO:0035308; GO:0035329; GO:0042470; GO:0042802; GO:0042826; GO:0043085; GO:0043488; GO:0044877; GO:0045296; GO:0045744; GO:0045892; GO:0048471; GO:0050815; GO:0051219; GO:0051220; GO:0061024; GO:0070062; GO:1900740		SUBCELLULAR LOCATION: Cytoplasm {ECO:0000269|PubMed:17081065}. Melanosome {ECO:0000269|PubMed:17081065}. Note=Identified by mass spectrometry in melanosome fractions from stage I to stage IV.; SUBCELLULAR LOCATION: Vacuole membrane {ECO:0000269|PubMed:11260479}. Note=(Microbial infection) Upon infection with Chlamydia trachomatis, this protein is associated with the pathogen-containing vacuole me…		58	50	14-3-3 protein beta/alpha OS=Homo sapiens OX=9606 GN=YWHAB PE=1 SV=3 - [1433B_HUMAN]	71.54	1	10	17	166	4.77803e+09	4.28153e+09	3.30513e+09	201.628	71.54	16	62	170.517	70.73	16	55	151.331	64.63	13	49	246	28.0648	4.83057
P51149	RAB7A	Ras-related protein Rab-7a	FUNCTION: Key regulator in endo-lysosomal trafficking. Governs early-to-late endosomal maturation, microtubule minus-end as well as plus-end directed endosomal migration and positioning, and endosome-lysosome transport through different protein-protein interaction cascades. Plays a central role, not only in endosomal traffic, but also in many other cellular and physiological events, such as growt…	antigen processing and presentation of exogenous peptide antigen via MHC class II [GO:0019886]; autophagosome assembly [GO:0000045]; early endosome to late endosome transport [GO:0045022]; endocytosis [GO:0006897]; endosome to lysosome transport [GO:0008333]; epidermal growth factor catabolic process [GO:0007174]; establishment of vesicle localization [GO:0051650]; intracellular protein transport…	autophagosome membrane [GO:0000421]; cell [GO:0005623]; cytosol [GO:0005829]; endomembrane system [GO:0012505]; endosome membrane [GO:0010008]; extracellular exosome [GO:0070062]; extrinsic component of lysosome membrane [GO:0032419]; Golgi apparatus [GO:0005794]; late endosome [GO:0005770]; late endosome membrane [GO:0031902]; lipid droplet [GO:0005811]; lysosomal membrane [GO:0005765]; lysosome…	autophagosome membrane [GO:0000421]; cell [GO:0005623]; cytosol [GO:0005829]; endomembrane system [GO:0012505]; endosome membrane [GO:0010008]; extracellular exosome [GO:0070062]; extrinsic component of lysosome membrane [GO:0032419]; Golgi apparatus [GO:0005794]; late endosome [GO:0005770]; late endosome membrane [GO:0031902]; lipid droplet [GO:0005811]; lysosomal membrane [GO:0005765]; lysosome…	GDP binding [GO:0019003]; GTPase activity [GO:0003924]; GTP binding [GO:0005525]; retromer complex binding [GO:1905394]	GO:0000045; GO:0000421; GO:0003924; GO:0005525; GO:0005623; GO:0005764; GO:0005765; GO:0005770; GO:0005794; GO:0005811; GO:0005829; GO:0005886; GO:0006622; GO:0006886; GO:0006897; GO:0007174; GO:0008333; GO:0010008; GO:0012505; GO:0015031; GO:0016042; GO:0019003; GO:0019076; GO:0019886; GO:0022615; GO:0030667; GO:0030670; GO:0031902; GO:0032419; GO:0032482; GO:0033162; GO:0034045; GO:0042147; GO:…		SUBCELLULAR LOCATION: Cytoplasmic vesicle, phagosome membrane {ECO:0000269|PubMed:12944476, ECO:0000269|PubMed:21255211}; Peripheral membrane protein {ECO:0000305}; Cytoplasmic side {ECO:0000305}. Late endosome membrane {ECO:0000269|PubMed:12944476, ECO:0000269|PubMed:14617358, ECO:0000269|PubMed:16176980, ECO:0000269|PubMed:20028791}; Peripheral membrane protein {ECO:0000305}; Cytoplasmic side {…		59	50	Ras-related protein Rab-7a OS=Homo sapiens OX=9606 GN=RAB7A PE=1 SV=1 - [RAB7A_HUMAN]	71.01	1	13	13	76	6.91871e+08	6.26643e+08	456043214	74.0056	69.57	12	24	80.7438	69.57	12	26	82.5945	70.53	12	26	207	23.4748	6.69775
P07195	LDHB	L-lactate dehydrogenase B chain (LDH-B) (EC 1.1.1.27) (LDH heart subunit) (LDH-H) (Renal carcinoma antigen NY-REN-46)		carbohydrate metabolic process [GO:0005975]; pyruvate metabolic process [GO:0006090]	cytoplasm [GO:0005737]; cytosol [GO:0005829]; extracellular exosome [GO:0070062]; membrane [GO:0016020]; membrane raft [GO:0045121]	cytoplasm [GO:0005737]; cytosol [GO:0005829]; extracellular exosome [GO:0070062]; membrane [GO:0016020]; membrane raft [GO:0045121]; identical protein binding [GO:0042802]; L-lactate dehydrogenase activity [GO:0004459]; carbohydrate metabolic process [GO:0005975]; pyruvate metabolic process [GO:0006090]	identical protein binding [GO:0042802]; L-lactate dehydrogenase activity [GO:0004459]	GO:0004459; GO:0005737; GO:0005829; GO:0005975; GO:0006090; GO:0016020; GO:0042802; GO:0045121; GO:0070062		SUBCELLULAR LOCATION: Cytoplasm.		60	50	L-lactate dehydrogenase B chain OS=Homo sapiens OX=9606 GN=LDHB PE=1 SV=2 - [LDHB_HUMAN]	65.27	2	19	21	248	3.85853e+09	3.19373e+09	2.63747e+09	237.451	61.08	18	90	228.458	57.49	19	79	232.267	55.69	18	79	334	36.6151	6.04932
P63092	GNAS2	Guanine nucleotide-binding protein G(s) subunit alpha isoforms short (Adenylate cyclase-stimulating G alpha protein)	FUNCTION: Guanine nucleotide-binding proteins (G proteins) function as transducers in numerous signaling pathways controlled by G protein-coupled receptors (GPCRs) (PubMed:17110384). Signaling involves the activation of adenylyl cyclases, resulting in increased levels of the signaling molecule cAMP (PubMed:26206488, PubMed:8702665). GNAS functions downstream of several GPCRs, including beta-adren…	activation of adenylate cyclase activity [GO:0007190]; adenylate cyclase-activating adrenergic receptor signaling pathway [GO:0071880]; adenylate cyclase-activating dopamine receptor signaling pathway [GO:0007191]; adenylate cyclase-activating G protein-coupled receptor signaling pathway [GO:0007189]; bone development [GO:0060348]; cellular response to catecholamine stimulus [GO:0071870]; cellula…	cytoplasm [GO:0005737]; cytosol [GO:0005829]; extracellular exosome [GO:0070062]; heterotrimeric G-protein complex [GO:0005834]; intrinsic component of membrane [GO:0031224]; membrane [GO:0016020]; plasma membrane [GO:0005886]; trans-Golgi network membrane [GO:0032588]	cytoplasm [GO:0005737]; cytosol [GO:0005829]; extracellular exosome [GO:0070062]; heterotrimeric G-protein complex [GO:0005834]; intrinsic component of membrane [GO:0031224]; membrane [GO:0016020]; plasma membrane [GO:0005886]; trans-Golgi network membrane [GO:0032588]; adenylate cyclase activator activity [GO:0010856]; G-protein beta/gamma-subunit complex binding [GO:0031683]; GTP binding [GO:00…	adenylate cyclase activator activity [GO:0010856]; G-protein beta/gamma-subunit complex binding [GO:0031683]; GTPase activity [GO:0003924]; GTP binding [GO:0005525]; metal ion binding [GO:0046872]	GO:0003091; GO:0003924; GO:0005525; GO:0005737; GO:0005829; GO:0005834; GO:0005886; GO:0007186; GO:0007189; GO:0007190; GO:0007191; GO:0007608; GO:0010856; GO:0016020; GO:0031224; GO:0031683; GO:0032588; GO:0043547; GO:0043950; GO:0046872; GO:0046907; GO:0048589; GO:0050796; GO:0050890; GO:0060348; GO:0060789; GO:0070062; GO:0070527; GO:0071377; GO:0071380; GO:0071870; GO:0071880; GO:0120162		SUBCELLULAR LOCATION: Cell membrane {ECO:0000250|UniProtKB:P63094}; Lipid-anchor {ECO:0000250|UniProtKB:P63094}.		61	50	Guanine nucleotide-binding protein G(s) subunit alpha isoforms short OS=Homo sapiens OX=9606 GN=GNAS PE=1 SV=1 - [GNAS2_HUMAN]	9.64	7	1	2	8	3.57216e+08	2.83952e+07	1.0212e+07	7.43203	9.64	2	3	1.70304	9.64	2	3	0	6.85	1	2	394	45.6359	5.8208
P51148	RAB5C	Ras-related protein Rab-5C (L1880) (RAB5L)	FUNCTION: Protein transport. Probably involved in vesicular traffic (By similarity). {ECO:0000250}.	intracellular protein transport [GO:0006886]; neutrophil degranulation [GO:0043312]; plasma membrane to endosome transport [GO:0048227]; Rab protein signal transduction [GO:0032482]	azurophil granule membrane [GO:0035577]; early endosome membrane [GO:0031901]; endomembrane system [GO:0012505]; endosome [GO:0005768]; extracellular exosome [GO:0070062]; lipid droplet [GO:0005811]; lysosomal membrane [GO:0005765]; melanosome [GO:0042470]; plasma membrane [GO:0005886]	azurophil granule membrane [GO:0035577]; early endosome membrane [GO:0031901]; endomembrane system [GO:0012505]; endosome [GO:0005768]; extracellular exosome [GO:0070062]; lipid droplet [GO:0005811]; lysosomal membrane [GO:0005765]; melanosome [GO:0042470]; plasma membrane [GO:0005886]; GDP binding [GO:0019003]; GTP binding [GO:0005525]; GTPase activity [GO:0003924]; intracellular protein transpo…	GDP binding [GO:0019003]; GTPase activity [GO:0003924]; GTP binding [GO:0005525]	GO:0003924; GO:0005525; GO:0005765; GO:0005768; GO:0005811; GO:0005886; GO:0006886; GO:0012505; GO:0019003; GO:0031901; GO:0032482; GO:0035577; GO:0042470; GO:0043312; GO:0048227; GO:0070062		SUBCELLULAR LOCATION: Cell membrane {ECO:0000250}; Lipid-anchor {ECO:0000250}; Cytoplasmic side {ECO:0000250}. Early endosome membrane {ECO:0000250}; Lipid-anchor {ECO:0000250}. Melanosome {ECO:0000269|PubMed:17081065}. Note=Identified by mass spectrometry in melanosome fractions from stage I to stage IV.		65	49	Ras-related protein Rab-5C OS=Homo sapiens OX=9606 GN=RAB5C PE=1 SV=2 - [RAB5C_HUMAN]	59.26	1	7	10	67	3.93331e+08	4.45543e+08	3.53806e+08	71.6375	58.8	9	23	75.1134	58.8	9	24	74.6381	54.17	9	20	216	23.4678	8.41162
P84077	ARF1	ADP-ribosylation factor 1	FUNCTION: GTP-binding protein involved in protein trafficking among different compartments. Modulates vesicle budding and uncoating within the Golgi complex. Deactivation induces the redistribution of the entire Golgi complex to the endoplasmic reticulum, suggesting a crucial role in protein trafficking. In its GTP-bound form, its triggers the association with coat proteins with the Golgi membran…	actin filament organization [GO:0007015]; antigen processing and presentation of exogenous peptide antigen via MHC class II [GO:0019886]; cellular copper ion homeostasis [GO:0006878]; cellular response to virus [GO:0098586]; dendritic spine organization [GO:0097061]; Golgi to transport vesicle transport [GO:0055108]; interleukin-12-mediated signaling pathway [GO:0035722]; intracellular protein tr…	cell [GO:0005623]; cell leading edge [GO:0031252]; COPI-coated vesicle [GO:0030137]; cytoplasm [GO:0005737]; cytosol [GO:0005829]; extracellular exosome [GO:0070062]; focal adhesion [GO:0005925]; glutamatergic synapse [GO:0098978]; Golgi membrane [GO:0000139]; late endosome [GO:0005770]; neuron projection [GO:0043005]; perinuclear region of cytoplasm [GO:0048471]; peroxisomal membrane [GO:0005778…	cell [GO:0005623]; cell leading edge [GO:0031252]; COPI-coated vesicle [GO:0030137]; cytoplasm [GO:0005737]; cytosol [GO:0005829]; extracellular exosome [GO:0070062]; focal adhesion [GO:0005925]; glutamatergic synapse [GO:0098978]; Golgi membrane [GO:0000139]; late endosome [GO:0005770]; neuron projection [GO:0043005]; perinuclear region of cytoplasm [GO:0048471]; peroxisomal membrane [GO:0005778…	GDP binding [GO:0019003]; GTPase activity [GO:0003924]; GTP binding [GO:0005525]; magnesium ion binding [GO:0000287]; phospholipase D activator activity [GO:1990583]; protein domain specific binding [GO:0019904]; RNA binding [GO:0003723]	GO:0000139; GO:0000287; GO:0002090; GO:0003723; GO:0003924; GO:0005525; GO:0005623; GO:0005737; GO:0005770; GO:0005778; GO:0005802; GO:0005829; GO:0005886; GO:0005925; GO:0006661; GO:0006878; GO:0006886; GO:0007015; GO:0014069; GO:0016192; GO:0019003; GO:0019886; GO:0019904; GO:0030017; GO:0030137; GO:0031252; GO:0032991; GO:0034315; GO:0034379; GO:0035722; GO:0043005; GO:0045807; GO:0045956; GO:…		SUBCELLULAR LOCATION: Golgi apparatus {ECO:0000269|PubMed:17555535}. Cytoplasm, perinuclear region {ECO:0000269|PubMed:17555535}. Cell junction, synapse, synaptosome {ECO:0000250}. Cell junction, synapse, postsynaptic density {ECO:0000250}. Membrane {ECO:0000305}; Lipid-anchor {ECO:0000305}. Golgi apparatus, trans-Golgi network membrane {ECO:0000250|UniProtKB:P84078}; Lipid-anchor {ECO:0000250|Un…		66	49	ADP-ribosylation factor 1 OS=Homo sapiens OX=9606 GN=ARF1 PE=1 SV=2 - [ARF1_HUMAN]	70.72	4	4	9	45	1184094106	1.00179e+09	6.85091e+08	55.6274	56.35	6	16	47.6312	41.44	5	13	55.1743	55.8	8	16	181	20.6837	6.80029
P08133	ANXA6	Annexin A6 (67 kDa calelectrin) (Annexin VI) (Annexin-6) (Calphobindin-II) (CPB-II) (Chromobindin-20) (Lipocortin VI) (Protein III) (p68) (p70)	FUNCTION: May associate with CD21. May regulate the release of Ca(2+) from intracellular stores.	apoptotic signaling pathway [GO:0097190]; growth plate cartilage chondrocyte differentiation [GO:0003418]; ion transmembrane transport [GO:0034220]; mitochondrial calcium ion homeostasis [GO:0051560]; negative regulation of sequestering of calcium ion [GO:0051283]; neural crest cell migration [GO:0001755]; plasma membrane repair [GO:0001778]; regulation of muscle contraction [GO:0006937]	collagen-containing extracellular matrix [GO:0062023]; extracellular exosome [GO:0070062]; focal adhesion [GO:0005925]; late endosome membrane [GO:0031902]; lysosomal membrane [GO:0005765]; melanosome [GO:0042470]; membrane [GO:0016020]; mitochondrion [GO:0005739]; perinuclear region of cytoplasm [GO:0048471]	collagen-containing extracellular matrix [GO:0062023]; extracellular exosome [GO:0070062]; focal adhesion [GO:0005925]; late endosome membrane [GO:0031902]; lysosomal membrane [GO:0005765]; melanosome [GO:0042470]; membrane [GO:0016020]; mitochondrion [GO:0005739]; perinuclear region of cytoplasm [GO:0048471]; actin filament binding [GO:0051015]; calcium channel activity [GO:0005262]; calcium ion…	actin filament binding [GO:0051015]; calcium channel activity [GO:0005262]; calcium-dependent phospholipid binding [GO:0005544]; calcium-dependent protein binding [GO:0048306]; calcium ion binding [GO:0005509]; cholesterol binding [GO:0015485]; chondroitin sulfate binding [GO:0035374]; GTP binding [GO:0005525]; identical protein binding [GO:0042802]; ligand-gated ion channel activity [GO:0015276]…	GO:0001755; GO:0001778; GO:0001786; GO:0003418; GO:0005262; GO:0005509; GO:0005525; GO:0005544; GO:0005739; GO:0005765; GO:0005925; GO:0006937; GO:0008289; GO:0015276; GO:0015485; GO:0016020; GO:0031902; GO:0034220; GO:0035374; GO:0042470; GO:0042802; GO:0048306; GO:0048471; GO:0051015; GO:0051283; GO:0051560; GO:0062023; GO:0070062; GO:0097190		SUBCELLULAR LOCATION: Cytoplasm {ECO:0000250}. Melanosome {ECO:0000269|PubMed:17081065}. Note=Identified by mass spectrometry in melanosome fractions from stage I to stage IV.		67	49	Annexin A6 OS=Homo sapiens OX=9606 GN=ANXA6 PE=1 SV=3 - [ANXA6_HUMAN]	69.24	1	43	43	242	6.71938e+08	8.42291e+08	7.74106e+08	230.214	67.16	39	78	251.088	63.45	40	89	215.721	58.99	35	75	673	75.8256	5.60498
P50995	ANX11	Annexin A11 (56 kDa autoantigen) (Annexin XI) (Annexin-11) (Calcyclin-associated annexin 50) (CAP-50)	FUNCTION: Binds specifically to calcyclin in a calcium-dependent manner (By similarity). Required for midbody formation and completion of the terminal phase of cytokinesis. {ECO:0000250, ECO:0000269|PubMed:15197175}.	cytokinetic process [GO:0032506]; phagocytosis [GO:0006909]; response to calcium ion [GO:0051592]	azurophil granule [GO:0042582]; collagen-containing extracellular matrix [GO:0062023]; cytoplasm [GO:0005737]; cytosol [GO:0005829]; extracellular exosome [GO:0070062]; melanosome [GO:0042470]; membrane [GO:0016020]; midbody [GO:0030496]; nuclear envelope [GO:0005635]; nucleoplasm [GO:0005654]; phagocytic vesicle [GO:0045335]; specific granule [GO:0042581]; spindle [GO:0005819]	azurophil granule [GO:0042582]; collagen-containing extracellular matrix [GO:0062023]; cytoplasm [GO:0005737]; cytosol [GO:0005829]; extracellular exosome [GO:0070062]; melanosome [GO:0042470]; membrane [GO:0016020]; midbody [GO:0030496]; nuclear envelope [GO:0005635]; nucleoplasm [GO:0005654]; phagocytic vesicle [GO:0045335]; specific granule [GO:0042581]; spindle [GO:0005819]; calcium ion bindi…	calcium-dependent phospholipid binding [GO:0005544]; calcium-dependent protein binding [GO:0048306]; calcium ion binding [GO:0005509]; MHC class II protein complex binding [GO:0023026]; phosphatidylethanolamine binding [GO:0008429]; RNA binding [GO:0003723]; S100 protein binding [GO:0044548]	GO:0003723; GO:0005509; GO:0005544; GO:0005635; GO:0005654; GO:0005737; GO:0005819; GO:0005829; GO:0006909; GO:0008429; GO:0016020; GO:0023026; GO:0030496; GO:0032506; GO:0042470; GO:0042581; GO:0042582; GO:0044548; GO:0045335; GO:0048306; GO:0051592; GO:0062023; GO:0070062		SUBCELLULAR LOCATION: Cytoplasm {ECO:0000269|PubMed:28469040}. Melanosome. Nucleus envelope. Nucleus, nucleoplasm {ECO:0000269|PubMed:28469040}. Cytoplasm, cytoskeleton, spindle. Note=Found throughout the nucleoplasm at interphase and during mitosis concentrates around the mitotic apparatus (By similarity). Elevation of intracellular calcium causes relocalization from the nucleoplasm to the nucle…		68	49	Annexin A11 OS=Homo sapiens OX=9606 GN=ANXA11 PE=1 SV=1 - [ANX11_HUMAN]	31.49	2	14	14	44	1.33826e+08	1.2517e+08	1.65321e+08	33.4454	22.38	10	14	36.4396	24.36	10	15	40.5803	23.37	11	15	505	54.3551	7.6499
Q14974	IMB1	Importin subunit beta-1 (Importin-90) (Karyopherin subunit beta-1) (Nuclear factor p97) (Pore targeting complex 97 kDa subunit) (PTAC97)	FUNCTION: Functions in nuclear protein import, either in association with an adapter protein, like an importin-alpha subunit, which binds to nuclear localization signals (NLS) in cargo substrates, or by acting as autonomous nuclear transport receptor. Acting autonomously, serves itself as NLS receptor. Docking of the importin/substrate complex to the nuclear pore complex (NPC) is mediated by KPNB…	apoptotic DNA fragmentation [GO:0006309]; astral microtubule organization [GO:0030953]; establishment of mitotic spindle localization [GO:0040001]; establishment of protein localization [GO:0045184]; intracellular transport of virus [GO:0075733]; mitotic chromosome movement towards spindle pole [GO:0007079]; mitotic metaphase plate congression [GO:0007080]; mitotic spindle assembly [GO:0090307]; …	cell [GO:0005623]; cytoplasm [GO:0005737]; cytoplasmic stress granule [GO:0010494]; cytosol [GO:0005829]; endoplasmic reticulum tubular network [GO:0071782]; extracellular exosome [GO:0070062]; extracellular region [GO:0005576]; ficolin-1-rich granule lumen [GO:1904813]; host cell [GO:0043657]; membrane [GO:0016020]; nuclear envelope [GO:0005635]; nuclear membrane [GO:0031965]; nuclear pore [GO:0…	cell [GO:0005623]; cytoplasm [GO:0005737]; cytoplasmic stress granule [GO:0010494]; cytosol [GO:0005829]; endoplasmic reticulum tubular network [GO:0071782]; extracellular exosome [GO:0070062]; extracellular region [GO:0005576]; ficolin-1-rich granule lumen [GO:1904813]; host cell [GO:0043657]; membrane [GO:0016020]; nuclear envelope [GO:0005635]; nuclear membrane [GO:0031965]; nuclear pore [GO:0…	enzyme binding [GO:0019899]; Hsp90 protein binding [GO:0051879]; importin-alpha family protein binding [GO:0061676]; nuclear import signal receptor activity [GO:0061608]; nuclear localization sequence binding [GO:0008139]; protein domain specific binding [GO:0019904]; Ran GTPase binding [GO:0008536]; RNA binding [GO:0003723]; zinc ion binding [GO:0008270]	GO:0003723; GO:0005576; GO:0005623; GO:0005634; GO:0005635; GO:0005643; GO:0005654; GO:0005737; GO:0005829; GO:0006309; GO:0006606; GO:0006607; GO:0006610; GO:0007079; GO:0007080; GO:0008139; GO:0008270; GO:0008536; GO:0010494; GO:0016020; GO:0019054; GO:0019899; GO:0019904; GO:0030953; GO:0031291; GO:0031965; GO:0035580; GO:0040001; GO:0043312; GO:0043657; GO:0045184; GO:0045540; GO:0051879; GO:…		SUBCELLULAR LOCATION: Cytoplasm {ECO:0000269|PubMed:11891849}. Nucleus envelope {ECO:0000269|PubMed:11891849}.		70	48	Importin subunit beta-1 OS=Homo sapiens OX=9606 GN=KPNB1 PE=1 SV=2 - [IMB1_HUMAN]	47.03	1	32	32	160	4.92438e+08	4.28469e+08	3.37441e+08	183.132	44.18	27	61	141.994	37.33	24	48	155.764	38.13	26	51	876	97.108	4.77979
P15311	EZRI	Ezrin (Cytovillin) (Villin-2) (p81)	FUNCTION: Probably involved in connections of major cytoskeletal structures to the plasma membrane. In epithelial cells, required for the formation of microvilli and membrane ruffles on the apical pole. Along with PLEKHG6, required for normal macropinocytosis. {ECO:0000269|PubMed:17881735, ECO:0000269|PubMed:18270268, ECO:0000269|PubMed:19111582}.	actin cytoskeleton reorganization [GO:0031532]; actin filament bundle assembly [GO:0051017]; astral microtubule organization [GO:0030953]; axon guidance [GO:0007411]; cellular protein-containing complex localization [GO:0034629]; cellular response to cAMP [GO:0071320]; cortical microtubule organization [GO:0043622]; cytoskeletal anchoring at plasma membrane [GO:0007016]; establishment of centroso…	actin cytoskeleton [GO:0015629]; actin filament [GO:0005884]; apical part of cell [GO:0045177]; apical plasma membrane [GO:0016324]; astrocyte projection [GO:0097449]; basolateral plasma membrane [GO:0016323]; brush border [GO:0005903]; cell [GO:0005623]; cell body [GO:0044297]; cell periphery [GO:0071944]; cell projection [GO:0042995]; cell tip [GO:0051286]; ciliary basal body [GO:0036064]; cort…	actin cytoskeleton [GO:0015629]; actin filament [GO:0005884]; apical part of cell [GO:0045177]; apical plasma membrane [GO:0016324]; astrocyte projection [GO:0097449]; basolateral plasma membrane [GO:0016323]; brush border [GO:0005903]; cell [GO:0005623]; cell body [GO:0044297]; cell periphery [GO:0071944]; cell projection [GO:0042995]; cell tip [GO:0051286]; ciliary basal body [GO:0036064]; cort…	actin binding [GO:0003779]; actin filament binding [GO:0051015]; ATPase binding [GO:0051117]; cadherin binding [GO:0045296]; cell adhesion molecule binding [GO:0050839]; disordered domain specific binding [GO:0097718]; identical protein binding [GO:0042802]; microtubule binding [GO:0008017]; protein C-terminus binding [GO:0008022]; protein domain specific binding [GO:0019904]; protein kinase A bi…	GO:0000122; GO:0001650; GO:0001726; GO:0001772; GO:0001931; GO:0001951; GO:0003376; GO:0003723; GO:0003779; GO:0005615; GO:0005623; GO:0005737; GO:0005768; GO:0005829; GO:0005884; GO:0005886; GO:0005902; GO:0005903; GO:0005925; GO:0007016; GO:0007159; GO:0007411; GO:0008017; GO:0008022; GO:0008360; GO:0010628; GO:0010737; GO:0015629; GO:0016020; GO:0016323; GO:0016324; GO:0019898; GO:0019904; GO:…		SUBCELLULAR LOCATION: Apical cell membrane {ECO:0000269|PubMed:18046454}; Peripheral membrane protein {ECO:0000269|PubMed:18046454}; Cytoplasmic side {ECO:0000269|PubMed:18046454}. Cell projection {ECO:0000269|PubMed:18046454}. Cell projection, microvillus membrane {ECO:0000269|PubMed:18046454}; Peripheral membrane protein {ECO:0000269|PubMed:18046454}; Cytoplasmic side {ECO:0000269|PubMed:180464…		71	48	Ezrin OS=Homo sapiens OX=9606 GN=EZR PE=1 SV=4 - [EZRI_HUMAN]	43.86	2	18	32	186	1.30334e+09	1.28386e+09	1.52896e+09	172.221	42.15	25	59	171.904	39.76	27	60	200.834	41.3	27	67	586	69.3697	6.26514
P09525	ANXA4	Annexin A4 (35-beta calcimedin) (Annexin IV) (Annexin-4) (Carbohydrate-binding protein p33/p41) (Chromobindin-4) (Endonexin I) (Lipocortin IV) (P32.5) (PP4-X) (Placental anticoagulant protein II) (PAP-II) (Protein II)	FUNCTION: Calcium/phospholipid-binding protein which promotes membrane fusion and is involved in exocytosis. {ECO:0000250}.	epithelial cell differentiation [GO:0030855]; negative regulation of apoptotic process [GO:0043066]; negative regulation of interleukin-8 secretion [GO:2000483]; negative regulation of NF-kappaB transcription factor activity [GO:0032088]; Notch signaling pathway [GO:0007219]; regulation of transcription by RNA polymerase II [GO:0006357]; signal transduction [GO:0007165]	cell surface [GO:0009986]; collagen-containing extracellular matrix [GO:0062023]; cytoplasm [GO:0005737]; cytosol [GO:0005829]; extracellular exosome [GO:0070062]; nuclear membrane [GO:0031965]; nucleus [GO:0005634]; perinuclear region of cytoplasm [GO:0048471]; plasma membrane [GO:0005886]; vesicle membrane [GO:0012506]	cell surface [GO:0009986]; collagen-containing extracellular matrix [GO:0062023]; cytoplasm [GO:0005737]; cytosol [GO:0005829]; extracellular exosome [GO:0070062]; nuclear membrane [GO:0031965]; nucleus [GO:0005634]; perinuclear region of cytoplasm [GO:0048471]; plasma membrane [GO:0005886]; vesicle membrane [GO:0012506]; calcium ion binding [GO:0005509]; calcium-dependent phospholipid binding [G…	calcium-dependent phospholipid binding [GO:0005544]; calcium-dependent protein binding [GO:0048306]; calcium ion binding [GO:0005509]; chondroitin sulfate binding [GO:0035374]; heparin binding [GO:0008201]; identical protein binding [GO:0042802]; NF-kappaB binding [GO:0051059]; phospholipase inhibitor activity [GO:0004859]	GO:0004859; GO:0005509; GO:0005544; GO:0005634; GO:0005737; GO:0005829; GO:0005886; GO:0006357; GO:0007165; GO:0007219; GO:0008201; GO:0009986; GO:0012506; GO:0030855; GO:0031965; GO:0032088; GO:0035374; GO:0042802; GO:0043066; GO:0048306; GO:0048471; GO:0051059; GO:0062023; GO:0070062; GO:2000483				72	48	Annexin A4 OS=Homo sapiens OX=9606 GN=ANXA4 PE=1 SV=4 - [ANXA4_HUMAN]	64.58	1	18	19	87	3.24333e+08	3.57598e+08	3.30344e+08	77.8724	55.17	14	27	91.5267	61.13	17	32	86.2668	49.84	15	28	319	35.8601	6.12549
P53396	ACLY	ATP-citrate synthase (EC 2.3.3.8) (ATP-citrate (pro-S-)-lyase) (ACL) (Citrate cleavage enzyme)	FUNCTION: Catalyzes the cleavage of citrate into oxaloacetate and acetyl-CoA, the latter serving as common substrate for de novo cholesterol and fatty acid synthesis. {ECO:0000269|PubMed:10653665, ECO:0000269|PubMed:1371749, ECO:0000269|PubMed:19286649, ECO:0000269|PubMed:23932781, ECO:0000269|PubMed:9116495}.	acetyl-CoA biosynthetic process [GO:0006085]; cholesterol biosynthetic process [GO:0006695]; citrate metabolic process [GO:0006101]; coenzyme A metabolic process [GO:0015936]; fatty acid biosynthetic process [GO:0006633]; fatty-acyl-CoA biosynthetic process [GO:0046949]; lipid biosynthetic process [GO:0008610]; neutrophil degranulation [GO:0043312]; oxaloacetate metabolic process [GO:0006107]; po…	azurophil granule lumen [GO:0035578]; cytosol [GO:0005829]; extracellular exosome [GO:0070062]; extracellular region [GO:0005576]; ficolin-1-rich granule lumen [GO:1904813]; membrane [GO:0016020]; nucleoplasm [GO:0005654]; plasma membrane [GO:0005886]	azurophil granule lumen [GO:0035578]; cytosol [GO:0005829]; extracellular exosome [GO:0070062]; extracellular region [GO:0005576]; ficolin-1-rich granule lumen [GO:1904813]; membrane [GO:0016020]; nucleoplasm [GO:0005654]; plasma membrane [GO:0005886]; ATP binding [GO:0005524]; ATP citrate synthase activity [GO:0003878]; cofactor binding [GO:0048037]; metal ion binding [GO:0046872]; acetyl-CoA bi…	ATP binding [GO:0005524]; ATP citrate synthase activity [GO:0003878]; cofactor binding [GO:0048037]; metal ion binding [GO:0046872]	GO:0003878; GO:0005524; GO:0005576; GO:0005654; GO:0005829; GO:0005886; GO:0006085; GO:0006101; GO:0006107; GO:0006633; GO:0006695; GO:0008610; GO:0015936; GO:0016020; GO:0031325; GO:0035578; GO:0043312; GO:0046872; GO:0046949; GO:0048037; GO:0070062; GO:1904813		SUBCELLULAR LOCATION: Cytoplasm, cytosol {ECO:0000269|PubMed:9116495}.		73	48	ATP-citrate synthase OS=Homo sapiens OX=9606 GN=ACLY PE=1 SV=3 - [ACLY_HUMAN]	41.6	1	37	37	151	4.09432e+08	7.5527e+08	3.06778e+08	134.724	31.15	28	49	119.854	33.97	29	47	160.236	36.51	31	55	1101	120.762	7.32764
Q9BQE3	TBA1C	Tubulin alpha-1C chain (Alpha-tubulin 6) (Tubulin alpha-6 chain) [Cleaved into: Detyrosinated tubulin alpha-1C chain]	FUNCTION: Tubulin is the major constituent of microtubules. It binds two moles of GTP, one at an exchangeable site on the beta chain and one at a non-exchangeable site on the alpha chain.	cell division [GO:0051301]; cytoskeleton-dependent intracellular transport [GO:0030705]; microtubule-based process [GO:0007017]; microtubule cytoskeleton organization [GO:0000226]; mitotic cell cycle [GO:0000278]	cytoplasm [GO:0005737]; microtubule [GO:0005874]; microtubule cytoskeleton [GO:0015630]; nucleus [GO:0005634]; vesicle [GO:0031982]	cytoplasm [GO:0005737]; microtubule [GO:0005874]; microtubule cytoskeleton [GO:0015630]; nucleus [GO:0005634]; vesicle [GO:0031982]; GTP binding [GO:0005525]; GTPase activity [GO:0003924]; structural constituent of cytoskeleton [GO:0005200]; structural molecule activity [GO:0005198]; cell division [GO:0051301]; cytoskeleton-dependent intracellular transport [GO:0030705]; microtubule cytoskeleton …	GTPase activity [GO:0003924]; GTP binding [GO:0005525]; structural constituent of cytoskeleton [GO:0005200]; structural molecule activity [GO:0005198]	GO:0000226; GO:0000278; GO:0003924; GO:0005198; GO:0005200; GO:0005525; GO:0005634; GO:0005737; GO:0005874; GO:0007017; GO:0015630; GO:0030705; GO:0031982; GO:0051301		SUBCELLULAR LOCATION: Cytoplasm, cytoskeleton.		74	47	Tubulin alpha-1C chain OS=Homo sapiens OX=9606 GN=TUBA1C PE=1 SV=1 - [TBA1C_HUMAN]	60.8	3	4	26	312	5.78453e+09	5400415362	4.46395e+09	362.582	59.91	22	101	387.427	56.35	24	109	363.493	60.8	26	102	449	49.8635	5.09717
P02786	TFR1	Transferrin receptor protein 1 (TR) (TfR) (TfR1) (Trfr) (T9) (p90) (CD antigen CD71) [Cleaved into: Transferrin receptor protein 1, serum form (sTfR)]	FUNCTION: Cellular uptake of iron occurs via receptor-mediated endocytosis of ligand-occupied transferrin receptor into specialized endosomes. Endosomal acidification leads to iron release. The apotransferrin-receptor complex is then recycled to the cell surface with a return to neutral pH and the concomitant loss of affinity of apotransferrin for its receptor. Transferrin receptor is necessary f…	cellular iron ion homeostasis [GO:0006879]; cellular response to drug [GO:0035690]; cellular response to leukemia inhibitory factor [GO:1990830]; iron ion transport [GO:0006826]; membrane organization [GO:0061024]; negative regulation of apoptotic process [GO:0043066]; osteoclast differentiation [GO:0030316]; positive regulation of B cell proliferation [GO:0030890]; positive regulation of bone re…	basolateral plasma membrane [GO:0016323]; blood microparticle [GO:0072562]; cell [GO:0005623]; cell surface [GO:0009986]; clathrin-coated pit [GO:0005905]; clathrin-coated vesicle membrane [GO:0030665]; cytoplasmic vesicle [GO:0031410]; early endosome [GO:0005769]; endosome [GO:0005768]; endosome membrane [GO:0010008]; external side of plasma membrane [GO:0009897]; extracellular exosome [GO:00700…	basolateral plasma membrane [GO:0016323]; blood microparticle [GO:0072562]; cell [GO:0005623]; cell surface [GO:0009986]; clathrin-coated pit [GO:0005905]; clathrin-coated vesicle membrane [GO:0030665]; cytoplasmic vesicle [GO:0031410]; early endosome [GO:0005769]; endosome [GO:0005768]; endosome membrane [GO:0010008]; external side of plasma membrane [GO:0009897]; extracellular exosome [GO:00700…	double-stranded RNA binding [GO:0003725]; identical protein binding [GO:0042802]; protein-containing complex binding [GO:0044877]; protein homodimerization activity [GO:0042803]; protein kinase binding [GO:0019901]; RNA binding [GO:0003723]; transferrin receptor activity [GO:0004998]; virus receptor activity [GO:0001618]	GO:0001618; GO:0001934; GO:0003723; GO:0003725; GO:0004998; GO:0005576; GO:0005615; GO:0005623; GO:0005768; GO:0005769; GO:0005886; GO:0005887; GO:0005905; GO:0006826; GO:0006879; GO:0009897; GO:0009986; GO:0010008; GO:0010628; GO:0016020; GO:0016323; GO:0019901; GO:0030316; GO:0030665; GO:0030890; GO:0031334; GO:0031410; GO:0031623; GO:0033138; GO:0033572; GO:0035690; GO:0042102; GO:0042470; GO:…		SUBCELLULAR LOCATION: Cell membrane {ECO:0000269|PubMed:17081065}; Single-pass type II membrane protein {ECO:0000269|PubMed:17081065}. Melanosome {ECO:0000269|PubMed:17081065}. Note=Identified by mass spectrometry in melanosome fractions from stage I to stage IV. {ECO:0000269|PubMed:17081065}.; SUBCELLULAR LOCATION: [Transferrin receptor protein 1, serum form]: Secreted {ECO:0000269|PubMed:170810…	TRANSMEM 68..88; /note="Helical; Signal-anchor for type II membrane protein"; /evidence="ECO:0000255"	75	47	Transferrin receptor protein 1 OS=Homo sapiens OX=9606 GN=TFRC PE=1 SV=2 - [TFR1_HUMAN]	27.11	1	17	17	52	1.77708e+08	1.14033e+08	7.70652e+07	61.0743	25.53	16	21	43.2831	17.5	11	15	45.0752	19.47	12	16	760	84.8179	6.60986
P61106	RAB14	Ras-related protein Rab-14	FUNCTION: Involved in membrane trafficking between the Golgi complex and endosomes during early embryonic development. Regulates the Golgi to endosome transport of FGFR-containing vesicles during early development, a key process for developing basement membrane and epiblast and primitive endoderm lineages during early postimplantation development. May act by modulating the kinesin KIF16B-cargo as…	defense response to bacterium [GO:0042742]; endocytic recycling [GO:0032456]; fibroblast growth factor receptor signaling pathway [GO:0008543]; Golgi to endosome transport [GO:0006895]; intracellular protein transport [GO:0006886]; intracellular transport [GO:0046907]; neutrophil degranulation [GO:0043312]; phagolysosome assembly involved in apoptotic cell clearance [GO:0090387]; phosphatidylinos…	cytosol [GO:0005829]; early endosome [GO:0005769]; early endosome membrane [GO:0031901]; endomembrane system [GO:0012505]; extracellular exosome [GO:0070062]; Golgi membrane [GO:0000139]; Golgi stack [GO:0005795]; intracellular [GO:0005622]; intracellular membrane-bounded organelle [GO:0043231]; late endosome [GO:0005770]; lysosomal membrane [GO:0005765]; lysosome [GO:0005764]; nuclear outer memb…	cytosol [GO:0005829]; early endosome [GO:0005769]; early endosome membrane [GO:0031901]; endomembrane system [GO:0012505]; extracellular exosome [GO:0070062]; Golgi membrane [GO:0000139]; Golgi stack [GO:0005795]; intracellular [GO:0005622]; intracellular membrane-bounded organelle [GO:0043231]; late endosome [GO:0005770]; lysosomal membrane [GO:0005765]; lysosome [GO:0005764]; nuclear outer memb…	GDP binding [GO:0019003]; GTPase activity [GO:0003924]; GTP binding [GO:0005525]; myosin V binding [GO:0031489]	GO:0000139; GO:0003924; GO:0005525; GO:0005622; GO:0005764; GO:0005765; GO:0005769; GO:0005770; GO:0005791; GO:0005795; GO:0005802; GO:0005829; GO:0005886; GO:0006661; GO:0006886; GO:0006895; GO:0008543; GO:0012505; GO:0016192; GO:0019003; GO:0030140; GO:0031489; GO:0031901; GO:0032456; GO:0032482; GO:0032880; GO:0042175; GO:0042742; GO:0043231; GO:0043312; GO:0045335; GO:0045995; GO:0046907; GO:…		SUBCELLULAR LOCATION: Recycling endosome {ECO:0000269|PubMed:22595670}. Early endosome membrane {ECO:0000269|PubMed:16962593}; Lipid-anchor {ECO:0000305}; Cytoplasmic side {ECO:0000305}. Golgi apparatus membrane {ECO:0000269|PubMed:16962593}; Lipid-anchor {ECO:0000305}; Cytoplasmic side {ECO:0000305}. Golgi apparatus, trans-Golgi network membrane {ECO:0000269|PubMed:16962593}; Lipid-anchor {ECO:0…		76	47	Ras-related protein Rab-14 OS=Homo sapiens OX=9606 GN=RAB14 PE=1 SV=4 - [RAB14_HUMAN]	62.79	12	9	10	30	1.01598e+08	5.13739e+08	8.53694e+07	27.7172	44.19	7	9	31.1327	62.79	10	12	25.9194	52.09	7	9	215	23.8819	6.21436
P62873	GBB1	Guanine nucleotide-binding protein G(I)/G(S)/G(T) subunit beta-1 (Transducin beta chain 1)	FUNCTION: Guanine nucleotide-binding proteins (G proteins) are involved as a modulator or transducer in various transmembrane signaling systems. The beta and gamma chains are required for the GTPase activity, for replacement of GDP by GTP, and for G protein-effector interaction.	adenylate cyclase-activating dopamine receptor signaling pathway [GO:0007191]; cardiac muscle cell apoptotic process [GO:0010659]; cell population proliferation [GO:0008283]; cellular response to catecholamine stimulus [GO:0071870]; cellular response to hypoxia [GO:0071456]; cellular response to prostaglandin E stimulus [GO:0071380]; G protein-coupled acetylcholine receptor signaling pathway [GO:…	cell [GO:0005623]; cell body [GO:0044297]; cytosol [GO:0005829]; dendrite [GO:0030425]; extracellular exosome [GO:0070062]; extracellular vesicle [GO:1903561]; heterotrimeric G-protein complex [GO:0005834]; lysosomal membrane [GO:0005765]; membrane [GO:0016020]; photoreceptor disc membrane [GO:0097381]; photoreceptor inner segment [GO:0001917]; photoreceptor outer segment membrane [GO:0042622]; p…	cell [GO:0005623]; cell body [GO:0044297]; cytosol [GO:0005829]; dendrite [GO:0030425]; extracellular exosome [GO:0070062]; extracellular vesicle [GO:1903561]; heterotrimeric G-protein complex [GO:0005834]; lysosomal membrane [GO:0005765]; membrane [GO:0016020]; photoreceptor disc membrane [GO:0097381]; photoreceptor inner segment [GO:0001917]; photoreceptor outer segment membrane [GO:0042622]; p…	alkylglycerophosphoethanolamine phosphodiesterase activity [GO:0047391]; GTPase activity [GO:0003924]; GTPase binding [GO:0051020]; protein-containing complex binding [GO:0044877]; spectrin binding [GO:0030507]	GO:0001917; GO:0003924; GO:0005623; GO:0005765; GO:0005829; GO:0005834; GO:0005886; GO:0006457; GO:0007165; GO:0007186; GO:0007191; GO:0007200; GO:0007204; GO:0007213; GO:0007223; GO:0007265; GO:0008283; GO:0010659; GO:0016020; GO:0016056; GO:0030168; GO:0030425; GO:0030507; GO:0042622; GO:0044297; GO:0044877; GO:0045202; GO:0047391; GO:0050909; GO:0051020; GO:0060041; GO:0070062; GO:0071380; GO:…				77	47	Guanine nucleotide-binding protein G(I)/G(S)/G(T) subunit beta-1 OS=Homo sapiens OX=9606 GN=GNB1 PE=1 SV=3 - [GBB1_HUMAN]	53.24	2	5	10	45	2.75994e+08	2.58696e+08	1.85402e+08	77.1915	44.71	8	18	64.2836	47.94	9	16	37.4133	47.35	8	11	340	37.353	5.99854
P62826	RAN	GTP-binding nuclear protein Ran (Androgen receptor-associated protein 24) (GTPase Ran) (Ras-like protein TC4) (Ras-related nuclear protein)	FUNCTION: GTPase involved in nucleocytoplasmic transport, participating both to the import and the export from the nucleus of proteins and RNAs (PubMed:10400640, PubMed:8276887, PubMed:8896452, PubMed:8636225, PubMed:8692944, PubMed:9351834, PubMed:9428644, PubMed:9822603, PubMed:26272610). Switches between a cytoplasmic GDP- and a nuclear GTP-bound state by nucleotide exchange and GTP hydrolysis…	androgen receptor signaling pathway [GO:0030521]; cell division [GO:0051301]; DNA metabolic process [GO:0006259]; GTP metabolic process [GO:0046039]; intracellular transport of virus [GO:0075733]; miRNA metabolic process [GO:0010586]; mitotic cell cycle [GO:0000278]; mitotic sister chromatid segregation [GO:0000070]; mitotic spindle organization [GO:0007052]; positive regulation of protein bindin…	centriole [GO:0005814]; cytoplasm [GO:0005737]; cytosol [GO:0005829]; extracellular exosome [GO:0070062]; host cell [GO:0043657]; melanosome [GO:0042470]; membrane [GO:0016020]; midbody [GO:0030496]; nuclear envelope [GO:0005635]; nuclear pore [GO:0005643]; nucleolus [GO:0005730]; nucleoplasm [GO:0005654]; nucleus [GO:0005634]; protein-containing complex [GO:0032991]; recycling endosome [GO:00550…	centriole [GO:0005814]; cytoplasm [GO:0005737]; cytosol [GO:0005829]; extracellular exosome [GO:0070062]; host cell [GO:0043657]; melanosome [GO:0042470]; membrane [GO:0016020]; midbody [GO:0030496]; nuclear envelope [GO:0005635]; nuclear pore [GO:0005643]; nucleolus [GO:0005730]; nucleoplasm [GO:0005654]; nucleus [GO:0005634]; protein-containing complex [GO:0032991]; recycling endosome [GO:00550…	androgen receptor binding [GO:0050681]; cadherin binding [GO:0045296]; chromatin binding [GO:0003682]; GDP binding [GO:0019003]; GTPase activity [GO:0003924]; GTP binding [GO:0005525]; magnesium ion binding [GO:0000287]; protein heterodimerization activity [GO:0046982]; RNA binding [GO:0003723]	GO:0000054; GO:0000055; GO:0000056; GO:0000070; GO:0000278; GO:0000287; GO:0003682; GO:0003723; GO:0003924; GO:0005525; GO:0005634; GO:0005635; GO:0005643; GO:0005654; GO:0005730; GO:0005737; GO:0005814; GO:0005829; GO:0006259; GO:0006409; GO:0006606; GO:0006611; GO:0007052; GO:0010586; GO:0016020; GO:0016032; GO:0019003; GO:0030496; GO:0030521; GO:0032092; GO:0032991; GO:0035281; GO:0042307; GO:…		SUBCELLULAR LOCATION: Nucleus {ECO:0000269|PubMed:10679025, ECO:0000269|PubMed:12194828, ECO:0000269|PubMed:31075303, ECO:0000269|PubMed:8421051, ECO:0000269|PubMed:8896452, ECO:0000269|PubMed:9351834, ECO:0000269|PubMed:9822603}. Nucleus envelope {ECO:0000269|PubMed:8896452, ECO:0000269|PubMed:9822603}. Cytoplasm, cytosol {ECO:0000269|PubMed:8276887}. Cytoplasm {ECO:0000269|PubMed:10679025, ECO:…		79	46	GTP-binding nuclear protein Ran OS=Homo sapiens OX=9606 GN=RAN PE=1 SV=3 - [RAN_HUMAN]	45.37	1	12	12	54	1.88177e+09	1.40508e+09	1.41908e+09	48.5876	36.57	10	19	47.2412	30.56	9	16	42.9746	45.37	12	19	216	24.4076	7.48877
P20339	RAB5A	Ras-related protein Rab-5A (EC 3.6.5.2)	FUNCTION: Small GTPase which cycles between active GTP-bound and inactive GDP-bound states. In its active state, binds to a variety of effector proteins to regulate cellular responses such as of intracellular membrane trafficking, from the formation of transport vesicles to their fusion with membranes. Active GTP-bound form is able to recruit to membranes different sets of downstream effectors di…	amyloid-beta clearance by transcytosis [GO:0150093]; blood coagulation [GO:0007596]; early endosome to late endosome transport [GO:0045022]; endocytosis [GO:0006897]; intracellular protein transport [GO:0006886]; membrane organization [GO:0061024]; phagocytosis [GO:0006909]; phosphatidylinositol biosynthetic process [GO:0006661]; positive regulation of exocytosis [GO:0045921]; post-translational …	actin cytoskeleton [GO:0015629]; anchored component of synaptic vesicle membrane [GO:0098993]; axon [GO:0030424]; axon terminus [GO:0043679]; clathrin-coated vesicle membrane [GO:0030665]; cytoplasm [GO:0005737]; cytoplasmic side of early endosome membrane [GO:0098559]; cytosol [GO:0005829]; dendrite [GO:0030425]; early endosome [GO:0005769]; early endosome membrane [GO:0031901]; early phagosome …	actin cytoskeleton [GO:0015629]; anchored component of synaptic vesicle membrane [GO:0098993]; axon [GO:0030424]; axon terminus [GO:0043679]; clathrin-coated vesicle membrane [GO:0030665]; cytoplasm [GO:0005737]; cytoplasmic side of early endosome membrane [GO:0098559]; cytosol [GO:0005829]; dendrite [GO:0030425]; early endosome [GO:0005769]; early endosome membrane [GO:0031901]; early phagosome …	GDP binding [GO:0019003]; GTPase activity [GO:0003924]; GTP binding [GO:0005525]	GO:0001726; GO:0003924; GO:0005525; GO:0005737; GO:0005768; GO:0005769; GO:0005829; GO:0005886; GO:0006661; GO:0006886; GO:0006897; GO:0006909; GO:0007596; GO:0008021; GO:0010008; GO:0012505; GO:0015629; GO:0019003; GO:0030424; GO:0030425; GO:0030665; GO:0030670; GO:0031901; GO:0032009; GO:0032482; GO:0036465; GO:0036477; GO:0039694; GO:0042470; GO:0043025; GO:0043195; GO:0043679; GO:0043687; GO:…		SUBCELLULAR LOCATION: Cell membrane {ECO:0000269|PubMed:23815289}; Lipid-anchor {ECO:0000305|PubMed:7991565}; Cytoplasmic side {ECO:0000250|UniProtKB:P18066}. Early endosome membrane {ECO:0000269|PubMed:23815289, ECO:0000269|PubMed:25869668}; Lipid-anchor {ECO:0000305|PubMed:7991565}. Melanosome {ECO:0000269|PubMed:17081065}. Cytoplasmic vesicle {ECO:0000269|PubMed:10818110}. Cell projection, ruf…		80	46	Ras-related protein Rab-5A OS=Homo sapiens OX=9606 GN=RAB5A PE=1 SV=2 - [RAB5A_HUMAN]	30.23	1	2	5	17	2.13079e+08	229380862	1.95219e+08	15.368	23.72	4	6	19.11	21.4	4	7	10.1063	16.28	3	4	215	23.6438	8.14795
P48643	TCPE	T-complex protein 1 subunit epsilon (TCP-1-epsilon) (CCT-epsilon)	FUNCTION: Component of the chaperonin-containing T-complex (TRiC), a molecular chaperone complex that assists the folding of proteins upon ATP hydrolysis (PubMed:25467444). The TRiC complex mediates the folding of WRAP53/TCAB1, thereby regulating telomere maintenance (PubMed:25467444). As part of the TRiC complex may play a role in the assembly of BBSome, a complex involved in ciliogenesis regula…	binding of sperm to zona pellucida [GO:0007339]; positive regulation of establishment of protein localization to telomere [GO:1904851]; positive regulation of protein localization to Cajal body [GO:1904871]; positive regulation of telomerase RNA localization to Cajal body [GO:1904874]; positive regulation of telomere maintenance via telomerase [GO:0032212]; protein folding [GO:0006457]; protein s…	cell body [GO:0044297]; centrosome [GO:0005813]; chaperonin-containing T-complex [GO:0005832]; cytosol [GO:0005829]; extracellular exosome [GO:0070062]; microtubule [GO:0005874]	cell body [GO:0044297]; centrosome [GO:0005813]; chaperonin-containing T-complex [GO:0005832]; cytosol [GO:0005829]; extracellular exosome [GO:0070062]; microtubule [GO:0005874]; ATP binding [GO:0005524]; beta-tubulin binding [GO:0048487]; G-protein beta-subunit binding [GO:0031681]; mRNA 3'-UTR binding [GO:0003730]; mRNA 5'-UTR binding [GO:0048027]; unfolded protein binding [GO:0051082]; binding…	ATP binding [GO:0005524]; beta-tubulin binding [GO:0048487]; G-protein beta-subunit binding [GO:0031681]; mRNA 3'-UTR binding [GO:0003730]; mRNA 5'-UTR binding [GO:0048027]; unfolded protein binding [GO:0051082]	GO:0003730; GO:0005524; GO:0005813; GO:0005829; GO:0005832; GO:0005874; GO:0006457; GO:0007339; GO:0009615; GO:0031681; GO:0032212; GO:0044297; GO:0048027; GO:0048487; GO:0050821; GO:0051082; GO:0070062; GO:1901998; GO:1904851; GO:1904871; GO:1904874		SUBCELLULAR LOCATION: Cytoplasm {ECO:0000269|PubMed:20080638}. Cytoplasm, cytoskeleton, microtubule organizing center, centrosome {ECO:0000269|PubMed:14654843, ECO:0000269|PubMed:20080638}.		82	46	T-complex protein 1 subunit epsilon OS=Homo sapiens OX=9606 GN=CCT5 PE=1 SV=1 - [TCPE_HUMAN]	73.01	1	35	36	239	9.96268e+08	8.97901e+08	6.84036e+08	310.379	73.01	34	86	252.154	65.8	28	74	260.922	64.14	28	79	541	59.6328	5.65576
P49368	TCPG	T-complex protein 1 subunit gamma (TCP-1-gamma) (CCT-gamma) (hTRiC5)	FUNCTION: Component of the chaperonin-containing T-complex (TRiC), a molecular chaperone complex that assists the folding of proteins upon ATP hydrolysis (PubMed:25467444). The TRiC complex mediates the folding of WRAP53/TCAB1, thereby regulating telomere maintenance (PubMed:25467444). As part of the TRiC complex may play a role in the assembly of BBSome, a complex involved in ciliogenesis regula…	binding of sperm to zona pellucida [GO:0007339]; pore complex assembly [GO:0046931]; positive regulation of establishment of protein localization to telomere [GO:1904851]; positive regulation of protein localization to Cajal body [GO:1904871]; positive regulation of telomerase RNA localization to Cajal body [GO:1904874]; positive regulation of telomere maintenance via telomerase [GO:0032212]; pro…	cell body [GO:0044297]; chaperonin-containing T-complex [GO:0005832]; cytoskeleton [GO:0005856]; cytosol [GO:0005829]; extracellular exosome [GO:0070062]; microtubule [GO:0005874]; plasma membrane [GO:0005886]; zona pellucida receptor complex [GO:0002199]	cell body [GO:0044297]; chaperonin-containing T-complex [GO:0005832]; cytoskeleton [GO:0005856]; cytosol [GO:0005829]; extracellular exosome [GO:0070062]; microtubule [GO:0005874]; plasma membrane [GO:0005886]; zona pellucida receptor complex [GO:0002199]; ATP binding [GO:0005524]; RNA binding [GO:0003723]; unfolded protein binding [GO:0051082]; binding of sperm to zona pellucida [GO:0007339]; po…	ATP binding [GO:0005524]; RNA binding [GO:0003723]; unfolded protein binding [GO:0051082]	GO:0002199; GO:0003723; GO:0005524; GO:0005829; GO:0005832; GO:0005856; GO:0005874; GO:0005886; GO:0006457; GO:0007339; GO:0032212; GO:0044297; GO:0046931; GO:0050821; GO:0051082; GO:0070062; GO:1901998; GO:1904851; GO:1904871; GO:1904874		SUBCELLULAR LOCATION: Cytoplasm {ECO:0000305}.		83	46	T-complex protein 1 subunit gamma OS=Homo sapiens OX=9606 GN=CCT3 PE=1 SV=4 - [TCPG_HUMAN]	64.4	1	29	29	214	1.41724e+09	1.17527e+09	9.25573e+08	248.132	62.39	26	76	235.518	54.68	25	74	208.618	54.68	24	64	545	60.4953	6.49365
P23526	SAHH	Adenosylhomocysteinase (AdoHcyase) (EC 3.3.1.1) (S-adenosyl-L-homocysteine hydrolase)	FUNCTION: Adenosylhomocysteine is a competitive inhibitor of S-adenosyl-L-methionine-dependent methyl transferase reactions; therefore adenosylhomocysteinase may play a key role in the control of methylations via regulation of the intracellular concentration of adenosylhomocysteine. {ECO:0000269|PubMed:12590576}.	chronic inflammatory response to antigenic stimulus [GO:0002439]; circadian sleep/wake cycle [GO:0042745]; methylation [GO:0032259]; one-carbon metabolic process [GO:0006730]; response to hypoxia [GO:0001666]; response to nutrient [GO:0007584]; S-adenosylhomocysteine catabolic process [GO:0019510]; S-adenosylmethionine cycle [GO:0033353]; sulfur amino acid metabolic process [GO:0000096]	cytosol [GO:0005829]; extracellular exosome [GO:0070062]; melanosome [GO:0042470]; neuron projection [GO:0043005]; nucleus [GO:0005634]	cytosol [GO:0005829]; extracellular exosome [GO:0070062]; melanosome [GO:0042470]; neuron projection [GO:0043005]; nucleus [GO:0005634]; adenosylhomocysteinase activity [GO:0004013]; adenyl nucleotide binding [GO:0030554]; identical protein binding [GO:0042802]; NAD binding [GO:0051287]; chronic inflammatory response to antigenic stimulus [GO:0002439]; circadian sleep/wake cycle [GO:0042745]; met…	adenosylhomocysteinase activity [GO:0004013]; adenyl nucleotide binding [GO:0030554]; identical protein binding [GO:0042802]; NAD binding [GO:0051287]	GO:0000096; GO:0001666; GO:0002439; GO:0004013; GO:0005634; GO:0005829; GO:0006730; GO:0007584; GO:0019510; GO:0030554; GO:0032259; GO:0033353; GO:0042470; GO:0042745; GO:0042802; GO:0043005; GO:0051287; GO:0070062		SUBCELLULAR LOCATION: Cytoplasm {ECO:0000269|PubMed:17081065}. Melanosome {ECO:0000269|PubMed:17081065}. Note=Identified by mass spectrometry in melanosome fractions from stage I to stage IV.		84	46	Adenosylhomocysteinase OS=Homo sapiens OX=9606 GN=AHCY PE=1 SV=4 - [SAHH_HUMAN]	43.52	1	15	17	91	6.52573e+08	5.75131e+08	462614640	107.105	37.27	14	34	94.9172	37.04	15	32	77.636	34.26	13	25	432	47.6852	6.34131
P22314	UBA1	Ubiquitin-like modifier-activating enzyme 1 (EC 6.2.1.45) (Protein A1S9) (Ubiquitin-activating enzyme E1)	FUNCTION: Catalyzes the first step in ubiquitin conjugation to mark cellular proteins for degradation through the ubiquitin-proteasome system (PubMed:1606621, PubMed:1447181). Activates ubiquitin by first adenylating its C-terminal glycine residue with ATP, and thereafter linking this residue to the side chain of a cysteine residue in E1, yielding a ubiquitin-E1 thioester and free AMP (PubMed:144…	cellular response to DNA damage stimulus [GO:0006974]; protein modification by small protein conjugation [GO:0032446]; protein ubiquitination [GO:0016567]; ubiquitin-dependent protein catabolic process [GO:0006511]	cytoplasm [GO:0005737]; cytosol [GO:0005829]; extracellular exosome [GO:0070062]; mitochondrion [GO:0005739]; nucleoplasm [GO:0005654]; nucleus [GO:0005634]	cytoplasm [GO:0005737]; cytosol [GO:0005829]; extracellular exosome [GO:0070062]; mitochondrion [GO:0005739]; nucleoplasm [GO:0005654]; nucleus [GO:0005634]; ATP binding [GO:0005524]; RNA binding [GO:0003723]; ubiquitin activating enzyme activity [GO:0004839]; cellular response to DNA damage stimulus [GO:0006974]; protein modification by small protein conjugation [GO:0032446]; protein ubiquitinat…	ATP binding [GO:0005524]; RNA binding [GO:0003723]; ubiquitin activating enzyme activity [GO:0004839]	GO:0003723; GO:0004839; GO:0005524; GO:0005634; GO:0005654; GO:0005737; GO:0005739; GO:0005829; GO:0006511; GO:0006974; GO:0016567; GO:0032446; GO:0070062		SUBCELLULAR LOCATION: Cytoplasm {ECO:0000269|PubMed:1376922}. Mitochondrion {ECO:0000269|PubMed:1376922}. Nucleus {ECO:0000269|PubMed:1376922, ECO:0000269|PubMed:22456334}.; SUBCELLULAR LOCATION: [Isoform 1]: Nucleus {ECO:0000269|PubMed:7528747, ECO:0000269|PubMed:9099746}.; SUBCELLULAR LOCATION: [Isoform 2]: Cytoplasm {ECO:0000269|PubMed:7528747}.		85	45	Ubiquitin-like modifier-activating enzyme 1 OS=Homo sapiens OX=9606 GN=UBA1 PE=1 SV=3 - [UBA1_HUMAN]	53.21	1	40	40	244	6.30342e+08	5.67714e+08	5.03691e+08	255.701	41.12	30	76	278.364	44.99	34	81	302.537	49.62	36	87	1058	117.774	5.75732
P61020	RAB5B	Ras-related protein Rab-5B	FUNCTION: Protein transport. Probably involved in vesicular traffic (By similarity). {ECO:0000250}.	antigen processing and presentation [GO:0019882]; endocytosis [GO:0006897]; endosome organization [GO:0007032]; intracellular protein transport [GO:0006886]; neutrophil degranulation [GO:0043312]; plasma membrane to endosome transport [GO:0048227]; Rab protein signal transduction [GO:0032482]; regulation of endocytosis [GO:0030100]	anchored component of synaptic vesicle membrane [GO:0098993]; early endosome [GO:0005769]; early endosome membrane [GO:0031901]; endocytic vesicle [GO:0030139]; endomembrane system [GO:0012505]; endosome [GO:0005768]; extracellular exosome [GO:0070062]; intracellular [GO:0005622]; intracellular membrane-bounded organelle [GO:0043231]; melanosome [GO:0042470]; membrane [GO:0016020]; plasma membran…	anchored component of synaptic vesicle membrane [GO:0098993]; early endosome [GO:0005769]; early endosome membrane [GO:0031901]; endocytic vesicle [GO:0030139]; endomembrane system [GO:0012505]; endosome [GO:0005768]; extracellular exosome [GO:0070062]; intracellular [GO:0005622]; intracellular membrane-bounded organelle [GO:0043231]; melanosome [GO:0042470]; membrane [GO:0016020]; plasma membran…	GDP binding [GO:0019003]; GTPase activity [GO:0003924]; GTP binding [GO:0005525]; GTP-dependent protein binding [GO:0030742]	GO:0003924; GO:0005525; GO:0005622; GO:0005768; GO:0005769; GO:0005886; GO:0006886; GO:0006897; GO:0007032; GO:0012505; GO:0016020; GO:0019003; GO:0019882; GO:0030100; GO:0030139; GO:0030667; GO:0030742; GO:0031901; GO:0032482; GO:0042470; GO:0043231; GO:0043312; GO:0048227; GO:0070062; GO:0098993		SUBCELLULAR LOCATION: Cell membrane {ECO:0000269|PubMed:17081065}; Lipid-anchor {ECO:0000269|PubMed:17081065}; Cytoplasmic side {ECO:0000269|PubMed:17081065}. Early endosome membrane {ECO:0000269|PubMed:17081065}; Lipid-anchor {ECO:0000269|PubMed:17081065}. Melanosome {ECO:0000269|PubMed:17081065}. Note=Enriched in stage I melanosomes.		86	45	Ras-related protein Rab-5B OS=Homo sapiens OX=9606 GN=RAB5B PE=1 SV=1 - [RAB5B_HUMAN]	39.07	1	4	7	25	2.15069e+08	2.24595e+08	1.47282e+08	25.7838	39.07	7	10	22.6604	26.98	5	9	15.7953	21.86	4	6	215	23.6919	8.1333
P62820	RAB1A	Ras-related protein Rab-1A (YPT1-related protein)	FUNCTION: The small GTPases Rab are key regulators of intracellular membrane trafficking, from the formation of transport vesicles to their fusion with membranes. Rabs cycle between an inactive GDP-bound form and an active GTP-bound form that is able to recruit to membranes different sets of downstream effectors directly responsible for vesicle formation, movement, tethering and fusion. RAB1A reg…	autophagosome assembly [GO:0000045]; autophagy [GO:0006914]; cell migration [GO:0016477]; COPII-coated vesicle cargo loading [GO:0090110]; COPII vesicle coating [GO:0048208]; defense response to bacterium [GO:0042742]; endocytosis [GO:0006897]; endoplasmic reticulum to Golgi vesicle-mediated transport [GO:0006888]; Golgi organization [GO:0007030]; growth hormone secretion [GO:0030252]; interleuki…	cell [GO:0005623]; cytosol [GO:0005829]; early endosome [GO:0005769]; endomembrane system [GO:0012505]; endoplasmic reticulum [GO:0005783]; extracellular exosome [GO:0070062]; Golgi apparatus [GO:0005794]; Golgi membrane [GO:0000139]; melanosome [GO:0042470]; transport vesicle membrane [GO:0030658]	cell [GO:0005623]; cytosol [GO:0005829]; early endosome [GO:0005769]; endomembrane system [GO:0012505]; endoplasmic reticulum [GO:0005783]; extracellular exosome [GO:0070062]; Golgi apparatus [GO:0005794]; Golgi membrane [GO:0000139]; melanosome [GO:0042470]; transport vesicle membrane [GO:0030658]; cadherin binding [GO:0045296]; GTP binding [GO:0005525]; GTPase activity [GO:0003924]; autophagoso…	cadherin binding [GO:0045296]; GTPase activity [GO:0003924]; GTP binding [GO:0005525]	GO:0000045; GO:0000139; GO:0003924; GO:0005525; GO:0005623; GO:0005769; GO:0005783; GO:0005794; GO:0005829; GO:0006886; GO:0006888; GO:0006890; GO:0006897; GO:0006914; GO:0007030; GO:0012505; GO:0016192; GO:0016477; GO:0019068; GO:0030252; GO:0030658; GO:0032402; GO:0032482; GO:0034446; GO:0042470; GO:0042742; GO:0043687; GO:0045296; GO:0047496; GO:0048208; GO:0070062; GO:0072606; GO:0090110; GO:…		SUBCELLULAR LOCATION: Golgi apparatus {ECO:0000269|PubMed:22939626}. Endoplasmic reticulum {ECO:0000269|PubMed:22939626}. Early endosome {ECO:0000269|PubMed:21303926}. Cytoplasm, cytosol {ECO:0000303|PubMed:19942850}. Membrane {ECO:0000269|PubMed:19942850, ECO:0000269|PubMed:23815289}. Melanosome {ECO:0000250|UniProtKB:P62821}. Note=Alternates between membrane-associated and cytosolic forms. {ECO…		87	45	Ras-related protein Rab-1A OS=Homo sapiens OX=9606 GN=RAB1A PE=1 SV=3 - [RAB1A_HUMAN]	75.61	13	4	13	59	9.9898e+08	1351679371	4.00355e+08	61.3797	48.78	7	16	78.73	65.37	12	25	63.9886	60.98	9	18	205	22.6634	6.21436
P13473	LAMP2	Lysosome-associated membrane glycoprotein 2 (LAMP-2) (Lysosome-associated membrane protein 2) (CD107 antigen-like family member B) (LGP-96) (CD antigen CD107b)	FUNCTION: Plays an important role in chaperone-mediated autophagy, a process that mediates lysosomal degradation of proteins in response to various stresses and as part of the normal turnover of proteins with a long biological half-live (PubMed:8662539, PubMed:11082038, PubMed:18644871, PubMed:24880125, PubMed:27628032). Functions by binding target proteins, such as GAPDH and MLLT11, and targetin…	autophagosome maturation [GO:0097352]; cellular response to starvation [GO:0009267]; chaperone-mediated autophagy [GO:0061684]; establishment of protein localization to organelle [GO:0072594]; lysosomal protein catabolic process [GO:1905146]; muscle cell cellular homeostasis [GO:0046716]; negative regulation of protein-containing complex assembly [GO:0031333]; neutrophil degranulation [GO:0043312…	autolysosome [GO:0044754]; azurophil granule membrane [GO:0035577]; cell [GO:0005623]; chaperone-mediated autophagy translocation complex [GO:0061742]; extracellular exosome [GO:0070062]; extracellular space [GO:0005615]; ficolin-1-rich granule membrane [GO:0101003]; integral component of autophagosome membrane [GO:0097637]; late endosome [GO:0005770]; late endosome membrane [GO:0031902]; lysosom…	autolysosome [GO:0044754]; azurophil granule membrane [GO:0035577]; cell [GO:0005623]; chaperone-mediated autophagy translocation complex [GO:0061742]; extracellular exosome [GO:0070062]; extracellular space [GO:0005615]; ficolin-1-rich granule membrane [GO:0101003]; integral component of autophagosome membrane [GO:0097637]; late endosome [GO:0005770]; late endosome membrane [GO:0031902]; lysosom…	enzyme binding [GO:0019899]; protein domain specific binding [GO:0019904]	GO:0002576; GO:0005615; GO:0005623; GO:0005764; GO:0005765; GO:0005770; GO:0005802; GO:0005886; GO:0006605; GO:0009267; GO:0016020; GO:0017038; GO:0019899; GO:0019904; GO:0030670; GO:0031088; GO:0031333; GO:0031647; GO:0031902; GO:0035577; GO:0043202; GO:0043312; GO:0044754; GO:0045121; GO:0046716; GO:0048471; GO:0050821; GO:0061684; GO:0061740; GO:0061742; GO:0070062; GO:0072594; GO:0097352; GO:…		SUBCELLULAR LOCATION: Cell membrane {ECO:0000269|PubMed:17897319, ECO:0000269|PubMed:2912382}; Single-pass type I membrane protein {ECO:0000255|PROSITE-ProRule:PRU00740, ECO:0000269|PubMed:17897319}. Endosome membrane {ECO:0000269|PubMed:17897319}; Single-pass type I membrane protein {ECO:0000255|PROSITE-ProRule:PRU00740, ECO:0000269|PubMed:17897319}. Lysosome membrane {ECO:0000255|PROSITE-ProRul…	TRANSMEM 376..399; /note="Helical"; /evidence="ECO:0000255|PROSITE-ProRule:PRU00740"	88	45	Lysosome-associated membrane glycoprotein 2 OS=Homo sapiens OX=9606 GN=LAMP2 PE=1 SV=2 - [LAMP2_HUMAN]	11.46	1	4	4	18	2.37515e+08	2.96758e+08	2.0125e+08	16.0739	7.07	3	6	16.9495	9.27	3	6	16.1532	7.07	3	6	410	44.9323	5.63037
P35613	BASI	Basigin (5F7) (Collagenase stimulatory factor) (Extracellular matrix metalloproteinase inducer) (EMMPRIN) (Leukocyte activation antigen M6) (OK blood group antigen) (Tumor cell-derived collagenase stimulatory factor) (TCSF) (CD antigen CD147)	FUNCTION: Plays an important role in targeting the monocarboxylate transporters SLC16A1, SLC16A3, SLC16A8, SLC16A11 and SLC16A12 to the plasma membrane (PubMed:21778275). Plays pivotal roles in spermatogenesis, embryo implantation, neural network formation and tumor progression. Stimulates adjacent fibroblasts to produce matrix metalloproteinases (MMPS). Seems to be a receptor for oligomannosidic…	axon guidance [GO:0007411]; cell surface receptor signaling pathway [GO:0007166]; decidualization [GO:0046697]; dendrite self-avoidance [GO:0070593]; embryo implantation [GO:0007566]; extracellular matrix disassembly [GO:0022617]; extracellular matrix organization [GO:0030198]; homophilic cell adhesion via plasma membrane adhesion molecules [GO:0007156]; leukocyte migration [GO:0050900]; odontoge…	acrosomal membrane [GO:0002080]; axon [GO:0030424]; extracellular exosome [GO:0070062]; focal adhesion [GO:0005925]; Golgi membrane [GO:0000139]; integral component of plasma membrane [GO:0005887]; intracellular membrane-bounded organelle [GO:0043231]; melanosome [GO:0042470]; membrane [GO:0016020]; membrane raft [GO:0045121]; mitochondrion [GO:0005739]; plasma membrane [GO:0005886]; sarcolemma […	acrosomal membrane [GO:0002080]; axon [GO:0030424]; extracellular exosome [GO:0070062]; focal adhesion [GO:0005925]; Golgi membrane [GO:0000139]; integral component of plasma membrane [GO:0005887]; intracellular membrane-bounded organelle [GO:0043231]; melanosome [GO:0042470]; membrane [GO:0016020]; membrane raft [GO:0045121]; mitochondrion [GO:0005739]; plasma membrane [GO:0005886]; sarcolemma […	cadherin binding [GO:0045296]; cell-cell adhesion mediator activity [GO:0098632]; mannose binding [GO:0005537]	GO:0000139; GO:0002080; GO:0005537; GO:0005739; GO:0005886; GO:0005887; GO:0005925; GO:0006090; GO:0007156; GO:0007166; GO:0007411; GO:0007566; GO:0016020; GO:0022617; GO:0030198; GO:0030424; GO:0032755; GO:0042383; GO:0042470; GO:0042475; GO:0043231; GO:0043434; GO:0045121; GO:0045296; GO:0046689; GO:0046697; GO:0050900; GO:0051591; GO:0070062; GO:0070593; GO:0072659; GO:0098632		SUBCELLULAR LOCATION: Cell membrane {ECO:0000269|PubMed:15946952, ECO:0000269|PubMed:17127621, ECO:0000269|PubMed:21536654, ECO:0000269|PubMed:26195724, ECO:0000269|PubMed:28409866}; Single-pass type I membrane protein {ECO:0000303|PubMed:15946952}. Melanosome {ECO:0000269|PubMed:17081065}. Note=Identified by mass spectrometry in melanosome fractions from stage I to stage IV. In spermatozoa, loca…	TRANSMEM 324..344; /note="Helical"; /evidence="ECO:0000255"	90	45	Basigin OS=Homo sapiens OX=9606 GN=BSG PE=1 SV=2 - [BASI_HUMAN]	28.57	1	7	7	44	4.36758e+08	3.67272e+08	3.33079e+08	53.0092	22.86	5	15	57.2688	27.53	6	16	42.7338	28.57	7	13	385	42.1741	5.65576
Q04917	1433F	14-3-3 protein eta (Protein AS1)	FUNCTION: Adapter protein implicated in the regulation of a large spectrum of both general and specialized signaling pathways. Binds to a large number of partners, usually by recognition of a phosphoserine or phosphothreonine motif. Binding generally results in the modulation of the activity of the binding partner. Negatively regulates the kinase activity of PDPK1. {ECO:0000269|PubMed:12177059}.	glucocorticoid catabolic process [GO:0006713]; glucocorticoid receptor signaling pathway [GO:0042921]; intracellular protein transport [GO:0006886]; membrane depolarization during action potential [GO:0086010]; membrane organization [GO:0061024]; negative regulation of dendrite morphogenesis [GO:0050774]; positive regulation of protein insertion into mitochondrial membrane involved in apoptotic s…	cytoplasm [GO:0005737]; cytosol [GO:0005829]; extracellular exosome [GO:0070062]; intercalated disc [GO:0014704]; mitochondrion [GO:0005739]; plasma membrane [GO:0005886]	cytoplasm [GO:0005737]; cytosol [GO:0005829]; extracellular exosome [GO:0070062]; intercalated disc [GO:0014704]; mitochondrion [GO:0005739]; plasma membrane [GO:0005886]; actin binding [GO:0003779]; enzyme binding [GO:0019899]; glucocorticoid receptor binding [GO:0035259]; identical protein binding [GO:0042802]; insulin-like growth factor receptor binding [GO:0005159]; ion channel binding [GO:00…	actin binding [GO:0003779]; enzyme binding [GO:0019899]; glucocorticoid receptor binding [GO:0035259]; identical protein binding [GO:0042802]; insulin-like growth factor receptor binding [GO:0005159]; ion channel binding [GO:0044325]; protein domain specific binding [GO:0019904]; protein heterodimerization activity [GO:0046982]; sodium channel regulator activity [GO:0017080]	GO:0002028; GO:0003779; GO:0005159; GO:0005737; GO:0005739; GO:0005829; GO:0005886; GO:0006713; GO:0006886; GO:0014704; GO:0017080; GO:0019899; GO:0019904; GO:0021762; GO:0035259; GO:0042802; GO:0042921; GO:0044325; GO:0045664; GO:0045893; GO:0046982; GO:0048167; GO:0050774; GO:0061024; GO:0070062; GO:0086010; GO:1900740; GO:2000649				91	44	14-3-3 protein eta OS=Homo sapiens OX=9606 GN=YWHAH PE=1 SV=4 - [1433F_HUMAN]	56.91	2	12	16	98	4351406169	3.86827e+09	2.80227e+09	98.8105	56.91	16	36	101.977	54.07	13	34	77.1127	50.81	12	28	246	28.201	4.84326
P29401	TKT	Transketolase (TK) (EC 2.2.1.1)	FUNCTION: Catalyzes the transfer of a two-carbon ketol group from a ketose donor to an aldose acceptor, via a covalent intermediate with the cofactor thiamine pyrophosphate. {ECO:0000269|PubMed:27259054}.	glyceraldehyde-3-phosphate biosynthetic process [GO:0046166]; pentose-phosphate shunt [GO:0006098]; pentose-phosphate shunt, non-oxidative branch [GO:0009052]; regulation of growth [GO:0040008]; xylulose biosynthetic process [GO:0005999]	cytosol [GO:0005829]; extracellular exosome [GO:0070062]; nuclear body [GO:0016604]; nuclear speck [GO:0016607]; nucleoplasm [GO:0005654]; peroxisome [GO:0005777]; vesicle [GO:0031982]	cytosol [GO:0005829]; extracellular exosome [GO:0070062]; nuclear body [GO:0016604]; nuclear speck [GO:0016607]; nucleoplasm [GO:0005654]; peroxisome [GO:0005777]; vesicle [GO:0031982]; cofactor binding [GO:0048037]; metal ion binding [GO:0046872]; protein homodimerization activity [GO:0042803]; transketolase activity [GO:0004802]; glyceraldehyde-3-phosphate biosynthetic process [GO:0046166]; pen…	cofactor binding [GO:0048037]; metal ion binding [GO:0046872]; protein homodimerization activity [GO:0042803]; transketolase activity [GO:0004802]	GO:0004802; GO:0005654; GO:0005777; GO:0005829; GO:0005999; GO:0006098; GO:0009052; GO:0016604; GO:0016607; GO:0031982; GO:0040008; GO:0042803; GO:0046166; GO:0046872; GO:0048037; GO:0070062				93	44	Transketolase OS=Homo sapiens OX=9606 GN=TKT PE=1 SV=3 - [TKT_HUMAN]	60.19	1	31	31	186	1.05324e+09	8.22442e+08	6.8817e+08	212.773	52.97	26	64	207.933	54.25	26	62	213.231	56.98	27	60	623	67.8347	7.66455
P17987	TCPA	T-complex protein 1 subunit alpha (TCP-1-alpha) (CCT-alpha)	FUNCTION: Component of the chaperonin-containing T-complex (TRiC), a molecular chaperone complex that assists the folding of proteins upon ATP hydrolysis (PubMed:25467444). The TRiC complex mediates the folding of WRAP53/TCAB1, thereby regulating telomere maintenance (PubMed:25467444). As part of the TRiC complex may play a role in the assembly of BBSome, a complex involved in ciliogenesis regula…	binding of sperm to zona pellucida [GO:0007339]; interleukin-12-mediated signaling pathway [GO:0035722]; positive regulation of establishment of protein localization to telomere [GO:1904851]; positive regulation of protein localization to Cajal body [GO:1904871]; positive regulation of telomerase activity [GO:0051973]; positive regulation of telomerase RNA localization to Cajal body [GO:1904874];…	acrosomal vesicle [GO:0001669]; cell body [GO:0044297]; centrosome [GO:0005813]; chaperonin-containing T-complex [GO:0005832]; cytosol [GO:0005829]; extracellular exosome [GO:0070062]; Golgi apparatus [GO:0005794]; microtubule [GO:0005874]; nuclear heterochromatin [GO:0005720]; pericentriolar material [GO:0000242]; zona pellucida receptor complex [GO:0002199]	acrosomal vesicle [GO:0001669]; cell body [GO:0044297]; centrosome [GO:0005813]; chaperonin-containing T-complex [GO:0005832]; cytosol [GO:0005829]; extracellular exosome [GO:0070062]; Golgi apparatus [GO:0005794]; microtubule [GO:0005874]; nuclear heterochromatin [GO:0005720]; pericentriolar material [GO:0000242]; zona pellucida receptor complex [GO:0002199]; ATP binding [GO:0005524]; RNA bindin…	ATP binding [GO:0005524]; RNA binding [GO:0003723]; ubiquitin protein ligase binding [GO:0031625]; unfolded protein binding [GO:0051082]	GO:0000242; GO:0001669; GO:0002199; GO:0003723; GO:0005524; GO:0005720; GO:0005794; GO:0005813; GO:0005829; GO:0005832; GO:0005874; GO:0006457; GO:0007021; GO:0007339; GO:0031625; GO:0032212; GO:0035722; GO:0044053; GO:0044297; GO:0050821; GO:0051082; GO:0051973; GO:0070062; GO:0090666; GO:1901998; GO:1904851; GO:1904871; GO:1904874; GO:2000109		SUBCELLULAR LOCATION: Cytoplasm, cytosol {ECO:0000269|PubMed:1630492}. Cytoplasm, cytoskeleton, microtubule organizing center, centrosome {ECO:0000269|PubMed:14654843, ECO:0000269|PubMed:20080638}.		94	44	T-complex protein 1 subunit alpha OS=Homo sapiens OX=9606 GN=TCP1 PE=1 SV=1 - [TCPA_HUMAN]	73.38	1	32	32	224	1.08769e+09	8.34428e+08	6.76306e+08	279.084	71.22	30	82	233.439	72.48	30	73	231.81	73.38	31	69	556	60.3056	6.11279
P27105	STOM	Erythrocyte band 7 integral membrane protein (Protein 7.2b) (Stomatin)	FUNCTION: Regulates ion channel activity and transmembrane ion transport. Regulates ASIC2 and ASIC3 channel activity.	neutrophil degranulation [GO:0043312]; positive regulation by host of viral genome replication [GO:0044829]; positive regulation of protein targeting to membrane [GO:0090314]; regulation of acid-sensing ion channel activity [GO:1901585]	azurophil granule membrane [GO:0035577]; blood microparticle [GO:0072562]; cytoskeleton [GO:0005856]; endoplasmic reticulum [GO:0005783]; extracellular exosome [GO:0070062]; extracellular space [GO:0005615]; integral component of plasma membrane [GO:0005887]; melanosome [GO:0042470]; membrane [GO:0016020]; membrane raft [GO:0045121]; mitochondrion [GO:0005739]; perinuclear region of cytoplasm [GO…	azurophil granule membrane [GO:0035577]; blood microparticle [GO:0072562]; cytoskeleton [GO:0005856]; endoplasmic reticulum [GO:0005783]; extracellular exosome [GO:0070062]; extracellular space [GO:0005615]; integral component of plasma membrane [GO:0005887]; melanosome [GO:0042470]; membrane [GO:0016020]; membrane raft [GO:0045121]; mitochondrion [GO:0005739]; perinuclear region of cytoplasm [GO…	identical protein binding [GO:0042802]; protein homodimerization activity [GO:0042803]; RNA polymerase binding [GO:0070063]	GO:0005615; GO:0005739; GO:0005783; GO:0005856; GO:0005886; GO:0005887; GO:0016020; GO:0031982; GO:0035577; GO:0035579; GO:0042470; GO:0042802; GO:0042803; GO:0043312; GO:0044829; GO:0045121; GO:0048471; GO:0070062; GO:0070063; GO:0070821; GO:0072562; GO:0090314; GO:1901585	INTRAMEM 26..54; /evidence="ECO:0000255"	SUBCELLULAR LOCATION: Cell membrane {ECO:0000269|PubMed:9243190}; Peripheral membrane protein {ECO:0000269|PubMed:9243190}; Cytoplasmic side {ECO:0000269|PubMed:9243190}. Cytoplasm, cytoskeleton {ECO:0000269|PubMed:9243190}. Cell membrane {ECO:0000269|PubMed:12130500}; Lipid-anchor {ECO:0000269|PubMed:12130500}; Cytoplasmic side {ECO:0000269|PubMed:12130500}. Membrane raft {ECO:0000269|PubMed:121…		95	44	Erythrocyte band 7 integral membrane protein OS=Homo sapiens OX=9606 GN=STOM PE=1 SV=3 - [STOM_HUMAN]	20.14	1	4	4	14	1.86964e+07	2.39191e+07	7.29623e+07	11.3501	15.97	3	4	14.7977	15.97	3	5	11.6716	20.14	4	5	288	31.7107	7.88428
P53985	MOT1	Monocarboxylate transporter 1 (MCT 1) (Solute carrier family 16 member 1)	FUNCTION: Proton-coupled monocarboxylate transporter. Catalyzes the rapid transport across the plasma membrane of many monocarboxylates such as lactate, pyruvate, branched-chain oxo acids derived from leucine, valine and isoleucine, and the ketone bodies acetoacetate, beta-hydroxybutyrate and acetate. Depending on the tissue and on cicumstances, mediates the import or export of lactic acid and ke…	behavioral response to nutrient [GO:0051780]; cellular response to organic cyclic compound [GO:0071407]; centrosome cycle [GO:0007098]; glucose homeostasis [GO:0042593]; leukocyte migration [GO:0050900]; lipid metabolic process [GO:0006629]; mevalonate transport [GO:0015728]; monocarboxylic acid transport [GO:0015718]; plasma membrane lactate transport [GO:0035879]; pyruvate metabolic process [GO…	apical plasma membrane [GO:0016324]; basolateral plasma membrane [GO:0016323]; cell junction [GO:0030054]; centrosome [GO:0005813]; extracellular exosome [GO:0070062]; integral component of membrane [GO:0016021]; integral component of plasma membrane [GO:0005887]; intracellular membrane-bounded organelle [GO:0043231]; membrane [GO:0016020]; plasma membrane [GO:0005886]; synapse [GO:0045202]	apical plasma membrane [GO:0016324]; basolateral plasma membrane [GO:0016323]; cell junction [GO:0030054]; centrosome [GO:0005813]; extracellular exosome [GO:0070062]; integral component of membrane [GO:0016021]; integral component of plasma membrane [GO:0005887]; intracellular membrane-bounded organelle [GO:0043231]; membrane [GO:0016020]; plasma membrane [GO:0005886]; synapse [GO:0045202]; iden…	identical protein binding [GO:0042802]; lactate transmembrane transporter activity [GO:0015129]; mevalonate transmembrane transporter activity [GO:0015130]; monocarboxylic acid transmembrane transporter activity [GO:0008028]; organic cyclic compound binding [GO:0097159]; symporter activity [GO:0015293]	GO:0005813; GO:0005886; GO:0005887; GO:0006090; GO:0006629; GO:0007098; GO:0008028; GO:0015129; GO:0015130; GO:0015293; GO:0015718; GO:0015728; GO:0016020; GO:0016021; GO:0016323; GO:0016324; GO:0030054; GO:0032094; GO:0035879; GO:0042593; GO:0042802; GO:0043231; GO:0045202; GO:0050796; GO:0050900; GO:0051780; GO:0070062; GO:0071407; GO:0097159		SUBCELLULAR LOCATION: Cell membrane {ECO:0000269|PubMed:15505343, ECO:0000269|PubMed:17127621, ECO:0000269|PubMed:24390345}; Multi-pass membrane protein {ECO:0000269|PubMed:15505343, ECO:0000269|PubMed:17127621, ECO:0000269|PubMed:24390345}.	TRANSMEM 16..36; /note="Helical"; /evidence="ECO:0000255"; TRANSMEM 60..80; /note="Helical"; /evidence="ECO:0000255"; TRANSMEM 87..107; /note="Helical"; /evidence="ECO:0000255"; TRANSMEM 112..132; /note="Helical"; /evidence="ECO:0000255"; TRANSMEM 144..164; /note="Helical"; /evidence="ECO:0000255"; TRANSMEM 167..187; /note="Helical"; /evidence="ECO:0000255"; TRANSMEM 263..283; /note="Helical"; /e…	96	44	Monocarboxylate transporter 1 OS=Homo sapiens OX=9606 GN=SLC16A1 PE=1 SV=3 - [MOT1_HUMAN]	12	1	3	3	9	87597597	6.36083e+07	5.48449e+07	6.20197	4	1	2	11.4832	7	2	3	10.9964	12	3	4	500	53.9089	8.66064
P61006	RAB8A	Ras-related protein Rab-8A (Oncogene c-mel)	FUNCTION: The small GTPases Rab are key regulators of intracellular membrane trafficking, from the formation of transport vesicles to their fusion with membranes. Rabs cycle between an inactive GDP-bound form and an active GTP-bound form that is able to recruit to membranes different sets of downstream effectors directly responsible for vesicle formation, movement, tethering and fusion. That Rab …	autophagy [GO:0006914]; axonogenesis [GO:0007409]; cellular response to insulin stimulus [GO:0032869]; cilium assembly [GO:0060271]; Golgi vesicle fusion to target membrane [GO:0048210]; intracellular protein transport [GO:0006886]; neurotransmitter receptor transport, endosome to postsynaptic membrane [GO:0098887]; neurotransmitter receptor transport to postsynaptic membrane [GO:0098969]; post-t…	centriole [GO:0005814]; centrosome [GO:0005813]; ciliary basal body [GO:0036064]; ciliary base [GO:0097546]; cilium [GO:0005929]; cytosol [GO:0005829]; dendritic spine [GO:0043197]; endomembrane system [GO:0012505]; endosome [GO:0005768]; extracellular exosome [GO:0070062]; glutamatergic synapse [GO:0098978]; Golgi membrane [GO:0000139]; midbody [GO:0030496]; neuronal cell body [GO:0043025]; non-…	centriole [GO:0005814]; centrosome [GO:0005813]; ciliary basal body [GO:0036064]; ciliary base [GO:0097546]; cilium [GO:0005929]; cytosol [GO:0005829]; dendritic spine [GO:0043197]; endomembrane system [GO:0012505]; endosome [GO:0005768]; extracellular exosome [GO:0070062]; glutamatergic synapse [GO:0098978]; Golgi membrane [GO:0000139]; midbody [GO:0030496]; neuronal cell body [GO:0043025]; non-…	GDP binding [GO:0019003]; GTPase activity [GO:0003924]; GTP binding [GO:0005525]; myosin V binding [GO:0031489]; protein kinase binding [GO:0019901]; Rab GTPase binding [GO:0017137]	GO:0000139; GO:0003924; GO:0005525; GO:0005768; GO:0005813; GO:0005814; GO:0005829; GO:0005886; GO:0005929; GO:0006886; GO:0006904; GO:0006914; GO:0007409; GO:0008021; GO:0009306; GO:0010506; GO:0012505; GO:0014069; GO:0017137; GO:0017157; GO:0019003; GO:0019901; GO:0030140; GO:0030496; GO:0030670; GO:0031489; GO:0032482; GO:0032588; GO:0032869; GO:0036064; GO:0043025; GO:0043197; GO:0043687; GO:…		SUBCELLULAR LOCATION: Cell membrane {ECO:0000269|PubMed:26824392, ECO:0000305|PubMed:12221131}; Lipid-anchor {ECO:0000305|PubMed:12221131}; Cytoplasmic side {ECO:0000305|PubMed:12221131}. Golgi apparatus {ECO:0000269|PubMed:15837803}. Recycling endosome membrane {ECO:0000269|PubMed:19864458}. Cell projection, cilium {ECO:0000269|PubMed:21844891, ECO:0000269|PubMed:29125462}. Cytoplasmic vesicle, …		97	44	Ras-related protein Rab-8A OS=Homo sapiens OX=9606 GN=RAB8A PE=1 SV=1 - [RAB8A_HUMAN]	38.65	13	4	9	23	5.08981e+08	9.56098e+08	1.20885e+07	16.3738	28.5	5	7	24.3446	38.16	8	10	13.0435	27.54	5	6	207	23.6532	9.0708
P35579	MYH9	Myosin-9 (Cellular myosin heavy chain, type A) (Myosin heavy chain 9) (Myosin heavy chain, non-muscle IIa) (Non-muscle myosin heavy chain A) (NMMHC-A) (Non-muscle myosin heavy chain IIa) (NMMHC II-a) (NMMHC-IIA)	FUNCTION: Cellular myosin that appears to play a role in cytokinesis, cell shape, and specialized functions such as secretion and capping. During cell spreading, plays an important role in cytoskeleton reorganization, focal contacts formation (in the margins but not the central part of spreading cells), and lamellipodial retraction; this function is mechanically antagonized by MYH10. {ECO:0000269…	actin cytoskeleton reorganization [GO:0031532]; actin filament-based movement [GO:0030048]; actomyosin structure organization [GO:0031032]; angiogenesis [GO:0001525]; blood vessel endothelial cell migration [GO:0043534]; cytokinetic process [GO:0032506]; establishment of meiotic spindle localization [GO:0051295]; establishment of T cell polarity [GO:0001768]; integrin-mediated signaling pathway […	actin cytoskeleton [GO:0015629]; actomyosin [GO:0042641]; actomyosin contractile ring [GO:0005826]; adherens junction [GO:0005912]; brush border [GO:0005903]; cell [GO:0005623]; cell leading edge [GO:0031252]; cleavage furrow [GO:0032154]; cytoplasm [GO:0005737]; cytosol [GO:0005829]; extracellular exosome [GO:0070062]; focal adhesion [GO:0005925]; immunological synapse [GO:0001772]; membrane [GO…	actin cytoskeleton [GO:0015629]; actomyosin [GO:0042641]; actomyosin contractile ring [GO:0005826]; adherens junction [GO:0005912]; brush border [GO:0005903]; cell [GO:0005623]; cell leading edge [GO:0031252]; cleavage furrow [GO:0032154]; cytoplasm [GO:0005737]; cytosol [GO:0005829]; extracellular exosome [GO:0070062]; focal adhesion [GO:0005925]; immunological synapse [GO:0001772]; membrane [GO…	actin binding [GO:0003779]; actin-dependent ATPase activity [GO:0030898]; actin filament binding [GO:0051015]; ADP binding [GO:0043531]; ATPase activity [GO:0016887]; ATP binding [GO:0005524]; cadherin binding [GO:0045296]; calmodulin binding [GO:0005516]; integrin binding [GO:0005178]; microfilament motor activity [GO:0000146]; motor activity [GO:0003774]; protein domain specific binding [GO:001…	GO:0000146; GO:0000212; GO:0001525; GO:0001701; GO:0001725; GO:0001726; GO:0001768; GO:0001772; GO:0001778; GO:0001931; GO:0003723; GO:0003774; GO:0003779; GO:0005178; GO:0005516; GO:0005524; GO:0005623; GO:0005634; GO:0005737; GO:0005819; GO:0005826; GO:0005829; GO:0005886; GO:0005903; GO:0005912; GO:0005925; GO:0006509; GO:0006911; GO:0007229; GO:0007520; GO:0008360; GO:0015031; GO:0015629; GO:…		SUBCELLULAR LOCATION: Cytoplasm, cytoskeleton {ECO:0000250|UniProtKB:Q8VDD5}. Cytoplasm, cell cortex {ECO:0000250|UniProtKB:Q8VDD5}. Note=Colocalizes with actin filaments at lamellipodia margins and at the leading edge of migrating cells (PubMed:20052411). In retinal pigment epithelial cells, predominantly localized to stress fiber-like structures with some localization to cytoplasmic puncta (Pub…		98	44	Myosin-9 OS=Homo sapiens OX=9606 GN=MYH9 PE=1 SV=4 - [MYH9_HUMAN]	62.24	10	120	128	894	1.25899e+09	1.28722e+09	9.52907e+08	1064.82	56.99	114	287	1162.51	58.01	113	304	1105.69	59.39	116	303	1960	226.392	5.60498
Q14764	MVP	Major vault protein (MVP) (Lung resistance-related protein)	FUNCTION: Required for normal vault structure. Vaults are multi-subunit structures that may act as scaffolds for proteins involved in signal transduction. Vaults may also play a role in nucleo-cytoplasmic transport. Down-regulates IFNG-mediated STAT1 signaling and subsequent activation of JAK. Down-regulates SRC activity and signaling through MAP kinases. {ECO:0000269|PubMed:15133037, ECO:0000269…	ERBB signaling pathway [GO:0038127]; mRNA transport [GO:0051028]; negative regulation of protein autophosphorylation [GO:0031953]; negative regulation of protein tyrosine kinase activity [GO:0061099]; negative regulation of signaling [GO:0023057]; neutrophil degranulation [GO:0043312]; protein transport [GO:0015031]; regulation of signaling [GO:0023051]	cytoplasm [GO:0005737]; cytoskeleton [GO:0005856]; cytosol [GO:0005829]; extracellular exosome [GO:0070062]; extracellular region [GO:0005576]; ficolin-1-rich granule lumen [GO:1904813]; membrane [GO:0016020]; nuclear pore [GO:0005643]; nucleus [GO:0005634]; perinuclear region of cytoplasm [GO:0048471]; secretory granule lumen [GO:0034774]	cytoplasm [GO:0005737]; cytoskeleton [GO:0005856]; cytosol [GO:0005829]; extracellular exosome [GO:0070062]; extracellular region [GO:0005576]; ficolin-1-rich granule lumen [GO:1904813]; membrane [GO:0016020]; nuclear pore [GO:0005643]; nucleus [GO:0005634]; perinuclear region of cytoplasm [GO:0048471]; secretory granule lumen [GO:0034774]; identical protein binding [GO:0042802]; protein kinase b…	identical protein binding [GO:0042802]; protein kinase binding [GO:0019901]; protein phosphatase binding [GO:0019903]	GO:0005576; GO:0005634; GO:0005643; GO:0005737; GO:0005829; GO:0005856; GO:0015031; GO:0016020; GO:0019901; GO:0019903; GO:0023051; GO:0023057; GO:0031953; GO:0034774; GO:0038127; GO:0042802; GO:0043312; GO:0048471; GO:0051028; GO:0061099; GO:0070062; GO:1904813		SUBCELLULAR LOCATION: Cytoplasm {ECO:0000269|PubMed:15133037, ECO:0000269|PubMed:16441665}. Nucleus, nuclear pore complex {ECO:0000269|PubMed:16441665}. Cytoplasm, perinuclear region {ECO:0000269|PubMed:16441665}. Note=5% found in the nuclear pore complex (PubMed:15133037). Translocates from the nucleus to the cytoplasm upon EGF treatment (PubMed:16441665).		99	44	Major vault protein OS=Homo sapiens OX=9606 GN=MVP PE=1 SV=4 - [MVP_HUMAN]	47.14	1	28	28	93	2.33834e+08	2.6103e+08	1.87489e+08	78.9765	33.71	18	28	106.594	40.54	23	34	105.584	36.73	21	31	893	99.2659	5.47803
A0A0B4J2D5	GAL3B	Glutamine amidotransferase-like class 1 domain-containing protein 3B, mitochondrial (Keio novel protein-I) (KNP-I) (Protein GT335) (Protein HES1)			mitochondrion [GO:0005739]	mitochondrion [GO:0005739]		GO:0005739		SUBCELLULAR LOCATION: Mitochondrion {ECO:0000305}.				Glutamine amidotransferase-like class 1 domain-containing protein 3B, mitochondrial OS=Homo sapiens OX=9606 GN=GATD3B PE=1 SV=1 - [GAL3B_HUMAN]	29.1	2	5	5	7	0	9.42747e+07	5.79282e+07	2.7388	9.33	1	1	5.31341	15.67	3	3	8.33546	22.76	3	3	268	28.1247	8.26514
A0A1B0GTU1	ZC11B	Zinc finger CCCH domain-containing protein 11B	FUNCTION: May play a role in mRNA transport. {ECO:0000305}.			metal ion binding [GO:0046872]	metal ion binding [GO:0046872]	GO:0046872						Zinc finger CCCH domain-containing protein 11B OS=Homo sapiens OX=9606 GN=ZC3H11B PE=4 SV=1 - [ZC11B_HUMAN]	2.73	2	1	1	3	1.69636e+07	1.25897e+07	9.27604e+06	5.61935	2.73	1	1	5.26513	2.73	1	1	4.47602	2.73	1	1	805	88.8824	6.81494
A0A1B0GUS4	UB2L5	Ubiquitin-conjugating enzyme E2 L5 (EC 2.3.2.23) (Ubiquitin-protein ligase L5)	FUNCTION: Catalyzes the covalent attachment of ubiquitin to other proteins. {ECO:0000255|PROSITE-ProRule:PRU00388}.	protein K11-linked ubiquitination [GO:0070979]; ubiquitin-dependent protein catabolic process [GO:0006511]	ubiquitin ligase complex [GO:0000151]	ubiquitin ligase complex [GO:0000151]; ATP binding [GO:0005524]; ligase activity [GO:0016874]; ubiquitin conjugating enzyme activity [GO:0061631]; ubiquitin protein ligase binding [GO:0031625]; protein K11-linked ubiquitination [GO:0070979]; ubiquitin-dependent protein catabolic process [GO:0006511]	ATP binding [GO:0005524]; ligase activity [GO:0016874]; ubiquitin conjugating enzyme activity [GO:0061631]; ubiquitin protein ligase binding [GO:0031625]	GO:0000151; GO:0005524; GO:0006511; GO:0016874; GO:0031625; GO:0061631; GO:0070979						Ubiquitin-conjugating enzyme E2 L5 OS=Homo sapiens OX=9606 GN=UBE2L5 PE=2 SV=1 - [UB2L5_HUMAN]	52.6	1	1	5	17	2.15286e+08	1.46563e+08	2.33323e+08	20.1217	38.31	4	7	17.3573	48.05	4	5	15.6349	33.77	3	5	154	17.8642	7.84033
A0AV96	RBM47	RNA-binding protein 47 (RNA-binding motif protein 47)		cytidine to uridine editing [GO:0016554]; hematopoietic progenitor cell differentiation [GO:0002244]	nucleus [GO:0005634]	nucleus [GO:0005634]; mRNA binding [GO:0003729]; RNA binding [GO:0003723]; cytidine to uridine editing [GO:0016554]; hematopoietic progenitor cell differentiation [GO:0002244]	mRNA binding [GO:0003729]; RNA binding [GO:0003723]	GO:0002244; GO:0003723; GO:0003729; GO:0005634; GO:0016554		SUBCELLULAR LOCATION: Nucleus {ECO:0000250}.				RNA-binding protein 47 OS=Homo sapiens OX=9606 GN=RBM47 PE=1 SV=2 - [RBM47_HUMAN]	10.46	1	2	2	3	0	1.85742e+07	1.71811e+07		0			5.66345	10.46	2	2	0	3.37	1	1	593	64.0582	7.6792
A0AVI2	FR1L5	Fer-1-like protein 5	FUNCTION: Plays a role in myoblast fusion; probable mediator of endocytic recycling for membrane trafficking events during myotube formation. {ECO:0000250}.	membrane fusion [GO:0061025]; myoblast fusion [GO:0007520]; plasma membrane organization [GO:0007009]	integral component of membrane [GO:0016021]; plasma membrane [GO:0005886]	integral component of membrane [GO:0016021]; plasma membrane [GO:0005886]; membrane fusion [GO:0061025]; myoblast fusion [GO:0007520]; plasma membrane organization [GO:0007009]		GO:0005886; GO:0007009; GO:0007520; GO:0016021; GO:0061025		SUBCELLULAR LOCATION: Cell membrane {ECO:0000250}. Membrane {ECO:0000305}; Single-pass membrane protein {ECO:0000305}. Note=Colocalizes with EHD1 and EHD2 at plasma membrane in myoblasts and myotubes. Localizes into foci at the plasma membrane (By similarity). {ECO:0000250}.	TRANSMEM 1962..1982; /note="Helical"; /evidence="ECO:0000255"			Fer-1-like protein 5 OS=Homo sapiens OX=9606 GN=FER1L5 PE=2 SV=3 - [FR1L5_HUMAN]	0.73	1	1	1	1	0	0	529140		0				0			0	0.73	1	1	2057	237.782	8.04541
A0AVT1	UBA6	Ubiquitin-like modifier-activating enzyme 6 (Ubiquitin-activating enzyme 6) (EC 6.2.1.45) (Monocyte protein 4) (MOP-4) (Ubiquitin-activating enzyme E1-like protein 2) (E1-L2)	FUNCTION: Activates ubiquitin by first adenylating its C-terminal glycine residue with ATP, and thereafter linking this residue to the side chain of a cysteine residue in E1, yielding a ubiquitin-E1 thioester and free AMP. Specific for ubiquitin, does not activate ubiquitin-like peptides. Differs from UBE1 in its specificity for substrate E2 charging. Does not charge cell cycle E2s, such as CDC34…	amygdala development [GO:0021764]; cellular response to DNA damage stimulus [GO:0006974]; dendritic spine development [GO:0060996]; hippocampus development [GO:0021766]; learning [GO:0007612]; locomotory behavior [GO:0007626]; protein modification by small protein conjugation [GO:0032446]; protein ubiquitination [GO:0016567]; ubiquitin-dependent protein catabolic process [GO:0006511]	cytoplasm [GO:0005737]; cytosol [GO:0005829]; nucleus [GO:0005634]	cytoplasm [GO:0005737]; cytosol [GO:0005829]; nucleus [GO:0005634]; ATP binding [GO:0005524]; FAT10 activating enzyme activity [GO:0019780]; ubiquitin activating enzyme activity [GO:0004839]; amygdala development [GO:0021764]; cellular response to DNA damage stimulus [GO:0006974]; dendritic spine development [GO:0060996]; hippocampus development [GO:0021766]; learning [GO:0007612]; locomotory beh…	ATP binding [GO:0005524]; FAT10 activating enzyme activity [GO:0019780]; ubiquitin activating enzyme activity [GO:0004839]	GO:0004839; GO:0005524; GO:0005634; GO:0005737; GO:0005829; GO:0006511; GO:0006974; GO:0007612; GO:0007626; GO:0016567; GO:0019780; GO:0021764; GO:0021766; GO:0032446; GO:0060996						Ubiquitin-like modifier-activating enzyme 6 OS=Homo sapiens OX=9606 GN=UBA6 PE=1 SV=1 - [UBA6_HUMAN]	12.83	1	10	10	23	2.51192e+07	2.61412e+07	2.62054e+07	17.6271	8.08	6	7	16.832	10.65	8	8	12.0268	7.79	6	8	1052	117.895	6.13818
A0FGR8	ESYT2	Extended synaptotagmin-2 (E-Syt2) (Chr2Syt)	FUNCTION: Tethers the endoplasmic reticulum to the cell membrane and promotes the formation of appositions between the endoplasmic reticulum and the cell membrane. Binds glycerophospholipids in a barrel-like domain and may play a role in cellular lipid transport. Plays a role in FGF signaling via its role in the rapid internalization of FGFR1 that has been activated by FGF1 binding; this occurs m…	endocytosis [GO:0006897]; endoplasmic reticulum-plasma membrane tethering [GO:0061817]; glycosphingolipid metabolic process [GO:0006687]; lipid transport [GO:0006869]	endoplasmic reticulum membrane [GO:0005789]; endoplasmic reticulum-plasma membrane contact site [GO:0140268]; extrinsic component of cytoplasmic side of plasma membrane [GO:0031234]; integral component of plasma membrane [GO:0005887]; intrinsic component of endoplasmic reticulum membrane [GO:0031227]; membrane [GO:0016020]; organelle membrane contact site [GO:0044232]	endoplasmic reticulum membrane [GO:0005789]; endoplasmic reticulum-plasma membrane contact site [GO:0140268]; extrinsic component of cytoplasmic side of plasma membrane [GO:0031234]; integral component of plasma membrane [GO:0005887]; intrinsic component of endoplasmic reticulum membrane [GO:0031227]; membrane [GO:0016020]; organelle membrane contact site [GO:0044232]; cadherin binding [GO:004529…	cadherin binding [GO:0045296]; calcium-dependent phospholipid binding [GO:0005544]; calcium ion binding [GO:0005509]; identical protein binding [GO:0042802]; phosphatidylcholine binding [GO:0031210]; phosphatidylethanolamine binding [GO:0008429]; phosphatidylinositol binding [GO:0035091]	GO:0005509; GO:0005544; GO:0005789; GO:0005887; GO:0006687; GO:0006869; GO:0006897; GO:0008429; GO:0016020; GO:0031210; GO:0031227; GO:0031234; GO:0035091; GO:0042802; GO:0044232; GO:0045296; GO:0061817; GO:0140268		SUBCELLULAR LOCATION: Cell membrane {ECO:0000269|PubMed:17360437, ECO:0000269|PubMed:20833364, ECO:0000269|PubMed:23791178, ECO:0000269|PubMed:29469807}; Peripheral membrane protein {ECO:0000269|PubMed:17360437}. Endoplasmic reticulum membrane {ECO:0000269|PubMed:23791178, ECO:0000269|PubMed:29469807}; Multi-pass membrane protein {ECO:0000255}. Note=Localizes to endoplasmic reticulum-plasma membr…	TRANSMEM 104..124; /note="Helical"; /evidence="ECO:0000255"; TRANSMEM 128..148; /note="Helical"; /evidence="ECO:0000255"			Extended synaptotagmin-2 OS=Homo sapiens OX=9606 GN=ESYT2 PE=1 SV=1 - [ESYT2_HUMAN]	7.49	1	5	5	9	36939371	1.05116e+07	18931604	11.7255	6.51	4	4	8.32383	4.56	3	3	6.09138	3.37	2	2	921	102.294	9.26123
A1L0T0	HACL2	2-hydroxyacyl-CoA lyase 2 (EC 4.1.2.-) (Acetolactate synthase-like protein) (IlvB-like protein)	FUNCTION: Endoplasmic reticulum 2-OH acyl-CoA lyase involved in the cleavage (C1 removal) reaction in the fatty acid alpha-oxydation in a thiamine pyrophosphate (TPP)-dependent manner. Involved in the phytosphingosine degradation pathway. {ECO:0000269|PubMed:28289220}.	fatty acid alpha-oxidation [GO:0001561]	endoplasmic reticulum membrane [GO:0005789]; integral component of membrane [GO:0016021]; membrane [GO:0016020]	endoplasmic reticulum membrane [GO:0005789]; integral component of membrane [GO:0016021]; membrane [GO:0016020]; magnesium ion binding [GO:0000287]; thiamine pyrophosphate binding [GO:0030976]; transferase activity [GO:0016740]; fatty acid alpha-oxidation [GO:0001561]	magnesium ion binding [GO:0000287]; thiamine pyrophosphate binding [GO:0030976]; transferase activity [GO:0016740]	GO:0000287; GO:0001561; GO:0005789; GO:0016020; GO:0016021; GO:0016740; GO:0030976		SUBCELLULAR LOCATION: Endoplasmic reticulum membrane {ECO:0000269|PubMed:28289220}; Single-pass membrane protein {ECO:0000255}.	TRANSMEM 13..33; /note="Helical"; /evidence="ECO:0000255"			2-hydroxyacyl-CoA lyase 2 OS=Homo sapiens OX=9606 GN=ILVBL PE=1 SV=2 - [HACL2_HUMAN]	11.39	1	3	3	7	1.47326e+07	7.40254e+07	55427021	3.09005	7.75	2	2	10.1723	8.54	2	3	10.1106	8.54	2	2	632	67.8248	8.14795
A1L190	SYCE3	Synaptonemal complex central element protein 3 (Testis highly expressed gene 2 protein) (THEG-2)	FUNCTION: Major component of the transverse central element of synaptonemal complexes (SCS), formed between homologous chromosomes during meiotic prophase. Required for chromosome loading of the central element-specific SCS proteins, and for initiating synapsis between homologous chromosomes. Chromosome loading appears to require SYCP1. Required for fertility. {ECO:0000250|UniProtKB:B5KM66}.	cell division [GO:0051301]; positive regulation of apoptotic process [GO:0043065]; reciprocal meiotic recombination [GO:0007131]; spermatogenesis [GO:0007283]; synaptonemal complex assembly [GO:0007130]	central element [GO:0000801]; chromosome [GO:0005694]; nucleus [GO:0005634]	central element [GO:0000801]; chromosome [GO:0005694]; nucleus [GO:0005634]; cell division [GO:0051301]; positive regulation of apoptotic process [GO:0043065]; reciprocal meiotic recombination [GO:0007131]; spermatogenesis [GO:0007283]; synaptonemal complex assembly [GO:0007130]		GO:0000801; GO:0005634; GO:0005694; GO:0007130; GO:0007131; GO:0007283; GO:0043065; GO:0051301		SUBCELLULAR LOCATION: Nucleus {ECO:0000250|UniProtKB:B5KM66}. Chromosome {ECO:0000250|UniProtKB:B5KM66}. Note=Colocalizes with SYCE1 in the central elements. {ECO:0000250|UniProtKB:B5KM66}.				Synaptonemal complex central element protein 3 OS=Homo sapiens OX=9606 GN=SYCE3 PE=1 SV=1 - [SYCE3_HUMAN]	7.95	1	1	1	1	0	2.29916e+08	0		0			0	7.95	1	1		0			88	10.594	4.61475
A2RTX5	SYTC2	Threonine--tRNA ligase 2, cytoplasmic (EC 6.1.1.3) (Threonyl-tRNA synthetase) (ThrRS) (Threonyl-tRNA synthetase protein 3)	FUNCTION: Catalyzes the attachment of threonine to tRNA(Thr) in a two-step reaction: threonine is first activated by ATP to form Thr-AMP and then transferred to the acceptor end of tRNA(Thr). Also edits incorrectly charged tRNA(Thr) via its editing domain, at the post-transfer stage. {ECO:0000250|UniProtKB:Q8BLY2}.	threonyl-tRNA aminoacylation [GO:0006435]; tRNA aminoacylation for protein translation [GO:0006418]	cytoplasm [GO:0005737]; nucleus [GO:0005634]	cytoplasm [GO:0005737]; nucleus [GO:0005634]; aminoacyl-tRNA ligase activity [GO:0004812]; ATP binding [GO:0005524]; threonine-tRNA ligase activity [GO:0004829]; threonyl-tRNA aminoacylation [GO:0006435]; tRNA aminoacylation for protein translation [GO:0006418]	aminoacyl-tRNA ligase activity [GO:0004812]; ATP binding [GO:0005524]; threonine-tRNA ligase activity [GO:0004829]	GO:0004812; GO:0004829; GO:0005524; GO:0005634; GO:0005737; GO:0006418; GO:0006435		SUBCELLULAR LOCATION: Cytoplasm {ECO:0000250|UniProtKB:Q8BLY2}. Nucleus {ECO:0000250|UniProtKB:Q8BLY2}. Note=Primarily cytoplasmic. Also detected at lower levels in the nucleus. {ECO:0000250|UniProtKB:Q8BLY2}.				Threonine--tRNA ligase 2, cytoplasmic OS=Homo sapiens OX=9606 GN=TARS3 PE=1 SV=1 - [SYTC2_HUMAN]	3.74	1	1	3	7	6.92694e+07	7.76519e+07	9.85713e+07	4.1406	3.74	3	3	1.73444	1	1	2	1.89071	1	1	2	802	92.5865	6.04932
A2RUS2	DEND3	DENN domain-containing protein 3	FUNCTION: Guanine nucleotide exchange factor (GEF) activating RAB12. Promotes the exchange of GDP to GTP, converting inactive GDP-bound RAB12 into its active GTP-bound form (PubMed:20937701). Regulates autophagy in response to starvation through RAB12 activation. Starvation leads to ULK1/2-dependent phosphorylation of Ser-472 and Ser-490, which in turn allows recruitment of 14-3-3 adapter protein…	cellular protein catabolic process [GO:0044257]; endosome to lysosome transport [GO:0008333]	cytosol [GO:0005829]	cytosol [GO:0005829]; Rab guanyl-nucleotide exchange factor activity [GO:0017112]; cellular protein catabolic process [GO:0044257]; endosome to lysosome transport [GO:0008333]	Rab guanyl-nucleotide exchange factor activity [GO:0017112]	GO:0005829; GO:0008333; GO:0017112; GO:0044257		SUBCELLULAR LOCATION: Cytoplasm {ECO:0000250|UniProtKB:A2RT67}. Note=Transiently recruited to membranes to activate RAB12. {ECO:0000250|UniProtKB:A2RT67}.				DENN domain-containing protein 3 OS=Homo sapiens OX=9606 GN=DENND3 PE=1 SV=2 - [DEND3_HUMAN]	4.67	1	2	2	2	0	1.10141e+07	0		0			3.84193	4.67	2	2		0			1198	135.802	7.06396
A4D1P6	WDR91	WD repeat-containing protein 91	FUNCTION: Functions as a negative regulator of the PI3 kinase/PI3K activity associated with endosomal membranes via BECN1, a core subunit of the PI3K complex. By modifying the phosphatidylinositol 3-phosphate/PtdInsP3 content of endosomal membranes may regulate endosome fusion, recycling, sorting and early to late endosome transport (PubMed:26783301). It is for instance, required for the delivery…	early endosome to late endosome transport [GO:0045022]; regulation of cellular protein catabolic process [GO:1903362]; regulation of phosphatidylinositol 3-kinase activity [GO:0043551]	cytosol [GO:0005829]; early endosome membrane [GO:0031901]; extrinsic component of endosome membrane [GO:0031313]; late endosome membrane [GO:0031902]	cytosol [GO:0005829]; early endosome membrane [GO:0031901]; extrinsic component of endosome membrane [GO:0031313]; late endosome membrane [GO:0031902]; phosphatidylinositol 3-kinase regulator activity [GO:0035014]; early endosome to late endosome transport [GO:0045022]; regulation of cellular protein catabolic process [GO:1903362]; regulation of phosphatidylinositol 3-kinase activity [GO:0043551]	phosphatidylinositol 3-kinase regulator activity [GO:0035014]	GO:0005829; GO:0031313; GO:0031901; GO:0031902; GO:0035014; GO:0043551; GO:0045022; GO:1903362		SUBCELLULAR LOCATION: Early endosome membrane {ECO:0000269|PubMed:26783301}; Peripheral membrane protein {ECO:0000269|PubMed:26783301}. Late endosome membrane {ECO:0000269|PubMed:26783301, ECO:0000269|PubMed:28404643}.				WD repeat-containing protein 91 OS=Homo sapiens OX=9606 GN=WDR91 PE=1 SV=2 - [WDR91_HUMAN]	2.01	1	1	1	1	0	0	6162524		0				0			1.79768	2.01	1	1	747	83.2917	6.58057
A5A3E0	POTEF	POTE ankyrin domain family member F (ANKRD26-like family C member 1B) (Chimeric POTE-actin protein)		retina homeostasis [GO:0001895]	blood microparticle [GO:0072562]; cell cortex [GO:0005938]; extracellular exosome [GO:0070062]; extracellular space [GO:0005615]	blood microparticle [GO:0072562]; cell cortex [GO:0005938]; extracellular exosome [GO:0070062]; extracellular space [GO:0005615]; retina homeostasis [GO:0001895]		GO:0001895; GO:0005615; GO:0005938; GO:0070062; GO:0072562		SUBCELLULAR LOCATION: Cytoplasm, cell cortex {ECO:0000269|PubMed:17101985}. Note=Colocalizes with actin filaments.				POTE ankyrin domain family member F OS=Homo sapiens OX=9606 GN=POTEF PE=1 SV=2 - [POTEF_HUMAN]	10.88	3	1	10	348	3.66425e+10	36536675151	2.9265e+10	249.811	8.19	8	84	317.171	7.91	8	110	373.108	6.33	8	154	1075	121.367	6.20166
A5YKK6	CNOT1	CCR4-NOT transcription complex subunit 1 (CCR4-associated factor 1) (Negative regulator of transcription subunit 1 homolog) (NOT1H) (hNOT1)	FUNCTION: Scaffolding component of the CCR4-NOT complex which is one of the major cellular mRNA deadenylases and is linked to various cellular processes including bulk mRNA degradation, miRNA-mediated repression, translational repression during translational initiation and general transcription regulation. Additional complex functions may be a consequence of its influence on mRNA expression. Its …	DNA damage response, signal transduction by p53 class mediator resulting in cell cycle arrest [GO:0006977]; gene silencing by miRNA [GO:0035195]; multicellular organism development [GO:0007275]; negative regulation of intracellular estrogen receptor signaling pathway [GO:0033147]; negative regulation of retinoic acid receptor signaling pathway [GO:0048387]; negative regulation of transcription by…	CCR4-NOT complex [GO:0030014]; CCR4-NOT core complex [GO:0030015]; cytosol [GO:0005829]; extracellular space [GO:0005615]; membrane [GO:0016020]; nucleus [GO:0005634]; P-body [GO:0000932]; peroxisomal membrane [GO:0005778]	CCR4-NOT complex [GO:0030014]; CCR4-NOT core complex [GO:0030015]; cytosol [GO:0005829]; extracellular space [GO:0005615]; membrane [GO:0016020]; nucleus [GO:0005634]; P-body [GO:0000932]; peroxisomal membrane [GO:0005778]; armadillo repeat domain binding [GO:0070016]; estrogen receptor binding [GO:0030331]; molecular adaptor activity [GO:0060090]; protein domain specific binding [GO:0019904]; re…	armadillo repeat domain binding [GO:0070016]; estrogen receptor binding [GO:0030331]; molecular adaptor activity [GO:0060090]; protein domain specific binding [GO:0019904]; retinoic acid receptor binding [GO:0042974]; RNA binding [GO:0003723]	GO:0000122; GO:0000288; GO:0000289; GO:0000932; GO:0003723; GO:0005615; GO:0005634; GO:0005778; GO:0005829; GO:0006977; GO:0007275; GO:0010606; GO:0016020; GO:0017148; GO:0019904; GO:0030014; GO:0030015; GO:0030331; GO:0033147; GO:0035195; GO:0042974; GO:0048387; GO:0060090; GO:0060213; GO:0061014; GO:0070016; GO:0090503; GO:1900153; GO:2000036		SUBCELLULAR LOCATION: Cytoplasm, P-body {ECO:0000269|PubMed:21976065}. Nucleus {ECO:0000305|PubMed:21976065}. Note=NANOS2 promotes its localization to P-body. {ECO:0000250|UniProtKB:Q6ZQ08}.				CCR4-NOT transcription complex subunit 1 OS=Homo sapiens OX=9606 GN=CNOT1 PE=1 SV=2 - [CNOT1_HUMAN]	2.57	1	4	4	8	1.5198e+07	2.4112e+07	1.63349e+07	11.7062	2.57	4	4	6.2616	1.22	2	2	5.86263	1.39	2	2	2376	266.768	7.10791
A6NDG6	PGP	Glycerol-3-phosphate phosphatase (G3PP) (EC 3.1.3.21) (Aspartate-based ubiquitous Mg(2+)-dependent phosphatase) (AUM) (EC 3.1.3.48) (Phosphoglycolate phosphatase) (PGP)	FUNCTION: Glycerol-3-phosphate phosphatase hydrolyzing glycerol-3-phosphate into glycerol. Thereby, regulates the cellular levels of glycerol-3-phosphate a metabolic intermediate of glucose, lipid and energy metabolism. Was also shown to have a 2-phosphoglycolate phosphatase activity and a tyrosine-protein phosphatase activity. However, their physiological relevance is unclear (PubMed:26755581). …	dephosphorylation [GO:0016311]; glycerol biosynthetic process [GO:0006114]; glycerophospholipid metabolic process [GO:0006650]; negative regulation of gluconeogenesis [GO:0045721]; peptidyl-tyrosine dephosphorylation [GO:0035335]	cytoplasm [GO:0005737]	cytoplasm [GO:0005737]; glycerol-1-phosphatase activity [GO:0000121]; glycerol-3-phosphatase activity [GO:0043136]; magnesium ion binding [GO:0000287]; nucleotide phosphatase activity, acting on free nucleotides [GO:0098519]; phosphatase activity [GO:0016791]; phosphoglycolate phosphatase activity [GO:0008967]; protein tyrosine phosphatase activity [GO:0004725]; dephosphorylation [GO:0016311]; gl…	glycerol-1-phosphatase activity [GO:0000121]; glycerol-3-phosphatase activity [GO:0043136]; magnesium ion binding [GO:0000287]; nucleotide phosphatase activity, acting on free nucleotides [GO:0098519]; phosphatase activity [GO:0016791]; phosphoglycolate phosphatase activity [GO:0008967]; protein tyrosine phosphatase activity [GO:0004725]	GO:0000121; GO:0000287; GO:0004725; GO:0005737; GO:0006114; GO:0006650; GO:0008967; GO:0016311; GO:0016791; GO:0035335; GO:0043136; GO:0045721; GO:0098519						Glycerol-3-phosphate phosphatase OS=Homo sapiens OX=9606 GN=PGP PE=1 SV=1 - [PGP_HUMAN]	43.3	1	7	7	18	6.51622e+07	4.145e+07	2.64013e+07	19.3939	38.32	6	7	19.3871	26.48	5	6	11.9289	16.82	3	5	321	33.9845	6.13818
A6NF01	P121B	Putative nuclear envelope pore membrane protein POM 121B	FUNCTION: Putative component of the nuclear pore complex (NPC). The repeat-containing domain may be involved in anchoring components of the pore complex to the pore membrane (By similarity). {ECO:0000250}.	mRNA transport [GO:0051028]; protein import into nucleus [GO:0006606]; RNA export from nucleus [GO:0006405]	nuclear pore [GO:0005643]	nuclear pore [GO:0005643]; nuclear localization sequence binding [GO:0008139]; structural constituent of nuclear pore [GO:0017056]; mRNA transport [GO:0051028]; protein import into nucleus [GO:0006606]; RNA export from nucleus [GO:0006405]	nuclear localization sequence binding [GO:0008139]; structural constituent of nuclear pore [GO:0017056]	GO:0005643; GO:0006405; GO:0006606; GO:0008139; GO:0017056; GO:0051028		SUBCELLULAR LOCATION: Nucleus, nuclear pore complex {ECO:0000250}.				Putative nuclear envelope pore membrane protein POM 121B OS=Homo sapiens OX=9606 GN=POM121B PE=5 SV=2 - [P121B_HUMAN]	1.68	3	1	1	1	0	5.27166e+07	0		0			0	1.68	1	1		0			834	82.9644	9.94971
A6NHR9	SMHD1	Structural maintenance of chromosomes flexible hinge domain-containing protein 1 (SMC hinge domain-containing protein 1) (EC 3.6.1.-)	FUNCTION: Non-canonical member of the structural maintenance of chromosomes (SMC) protein family that plays a key role in epigenetic silencing by regulating chromatin architecture (By similarity). Promotes heterochromatin formation in both autosomes and chromosome X, probably by mediating the merge of chromatin compartments (By similarity). Plays a key role in chromosome X inactivation in females…	dosage compensation by inactivation of X chromosome [GO:0009048]; double-strand break repair [GO:0006302]; heterochromatin organization involved in chromatin silencing [GO:0070868]; inactivation of X chromosome by DNA methylation [GO:0060821]; inactivation of X chromosome by heterochromatin assembly [GO:0060820]; negative regulation of double-strand break repair via homologous recombination [GO:2…	Barr body [GO:0001740]; site of double-strand break [GO:0035861]	Barr body [GO:0001740]; site of double-strand break [GO:0035861]; ATP binding [GO:0005524]; ATPase activity [GO:0016887]; DNA binding [GO:0003677]; protein homodimerization activity [GO:0042803]; dosage compensation by inactivation of X chromosome [GO:0009048]; double-strand break repair [GO:0006302]; heterochromatin organization involved in chromatin silencing [GO:0070868]; inactivation of X chr…	ATPase activity [GO:0016887]; ATP binding [GO:0005524]; DNA binding [GO:0003677]; protein homodimerization activity [GO:0042803]	GO:0001740; GO:0003677; GO:0005524; GO:0006302; GO:0009048; GO:0016887; GO:0035861; GO:0042803; GO:0043584; GO:0045739; GO:0060820; GO:0060821; GO:0070868; GO:2000042; GO:2001034		SUBCELLULAR LOCATION: Chromosome {ECO:0000269|PubMed:24790221, ECO:0000269|PubMed:25294876}. Note=Recruited to inactivated chromosome X in females by Xist RNA (By similarity). Localizes at sites of DNA damage at double-strand breaks (DSBs) (PubMed:25294876, PubMed:24790221). {ECO:0000250|UniProtKB:Q6P5D8, ECO:0000269|PubMed:24790221, ECO:0000269|PubMed:25294876}.				Structural maintenance of chromosomes flexible hinge domain-containing protein 1 OS=Homo sapiens OX=9606 GN=SMCHD1 PE=1 SV=2 - [SMHD1_HUMAN]	3.64	1	6	6	11	4.61862e+06	1.70816e+07	2.38515e+07	5.23325	1.55	2	2	9.88652	2.24	4	4	11.198	2.09	4	5	2005	226.231	7.29834
A6NHS7	MANS4	MANSC domain-containing protein 4			integral component of membrane [GO:0016021]	integral component of membrane [GO:0016021]		GO:0016021		SUBCELLULAR LOCATION: Membrane {ECO:0000305}; Single-pass type I membrane protein {ECO:0000305}.	TRANSMEM 285..305; /note="Helical"; /evidence="ECO:0000255"			MANSC domain-containing protein 4 OS=Homo sapiens OX=9606 GN=MANSC4 PE=3 SV=3 - [MANS4_HUMAN]	2.06	1	1	1	1	0	72395747	0		0			2.39489	2.06	1	1		0			340	37.8548	8.01611
A8MWD9	RUXGL	Putative small nuclear ribonucleoprotein G-like protein 15	FUNCTION: Associated with snRNP U1, U2, U4/U6 and U5. {ECO:0000250}.	mRNA splicing, via spliceosome [GO:0000398]; spliceosomal snRNP assembly [GO:0000387]	catalytic step 2 spliceosome [GO:0071013]; P granule [GO:0043186]; precatalytic spliceosome [GO:0071011]; ribonucleoprotein complex [GO:1990904]; SMN-Sm protein complex [GO:0034719]; spliceosomal tri-snRNP complex [GO:0097526]; U12-type spliceosomal complex [GO:0005689]; U1 snRNP [GO:0005685]; U2 snRNP [GO:0005686]; U2-type prespliceosome [GO:0071004]; U4 snRNP [GO:0005687]; U5 snRNP [GO:0005682]	catalytic step 2 spliceosome [GO:0071013]; P granule [GO:0043186]; precatalytic spliceosome [GO:0071011]; ribonucleoprotein complex [GO:1990904]; SMN-Sm protein complex [GO:0034719]; spliceosomal tri-snRNP complex [GO:0097526]; U1 snRNP [GO:0005685]; U12-type spliceosomal complex [GO:0005689]; U2 snRNP [GO:0005686]; U2-type prespliceosome [GO:0071004]; U4 snRNP [GO:0005687]; U5 snRNP [GO:0005682]…	RNA binding [GO:0003723]	GO:0000387; GO:0000398; GO:0003723; GO:0005682; GO:0005685; GO:0005686; GO:0005687; GO:0005689; GO:0034719; GO:0043186; GO:0071004; GO:0071011; GO:0071013; GO:0097526; GO:1990904		SUBCELLULAR LOCATION: Nucleus {ECO:0000250}.				Putative small nuclear ribonucleoprotein G-like protein 15 OS=Homo sapiens OX=9606 GN=SNRPGP15 PE=5 SV=2 - [RUXGL_HUMAN]	17.11	2	1	1	5	223092877	214771632	283161015	4.22931	17.11	1	1	6.87332	17.11	1	2	7.03746	17.11	1	2	76	8.53845	8.83643
B0I1T2	MYO1G	Unconventional myosin-Ig [Cleaved into: Minor histocompatibility antigen HA-2 (mHag HA-2)]	FUNCTION: Unconventional myosin required during immune response for detection of rare antigen-presenting cells by regulating T-cell migration. Unconventional myosins are actin-based motor molecules with ATPase activity and serve in intracellular movements. Acts as a regulator of T-cell migration by generating membrane tension, enforcing cell-intrinsic meandering search, thereby enhancing detectio…	cell gliding [GO:0071976]; cell-substrate adhesion [GO:0031589]; exocytosis [GO:0006887]; Fc-gamma receptor signaling pathway involved in phagocytosis [GO:0038096]; T cell meandering migration [GO:0120117]; T cell mediated immunity [GO:0002456]; T cell migration [GO:0072678]	extracellular exosome [GO:0070062]; filopodium [GO:0030175]; lamellipodium [GO:0030027]; leading edge membrane [GO:0031256]; membrane [GO:0016020]; microvillus [GO:0005902]; myosin complex [GO:0016459]; phagocytic cup [GO:0001891]; plasma membrane [GO:0005886]	extracellular exosome [GO:0070062]; filopodium [GO:0030175]; lamellipodium [GO:0030027]; leading edge membrane [GO:0031256]; membrane [GO:0016020]; microvillus [GO:0005902]; myosin complex [GO:0016459]; phagocytic cup [GO:0001891]; plasma membrane [GO:0005886]; actin binding [GO:0003779]; ATP binding [GO:0005524]; calmodulin binding [GO:0005516]; motor activity [GO:0003774]; phosphatidylinositol-…	actin binding [GO:0003779]; ATP binding [GO:0005524]; calmodulin binding [GO:0005516]; motor activity [GO:0003774]; phosphatidylinositol-3,4,5-trisphosphate binding [GO:0005547]; phosphatidylinositol-3,4-bisphosphate binding [GO:0043325]; phosphatidylinositol-4,5-bisphosphate binding [GO:0005546]	GO:0001891; GO:0002456; GO:0003774; GO:0003779; GO:0005516; GO:0005524; GO:0005546; GO:0005547; GO:0005886; GO:0005902; GO:0006887; GO:0016020; GO:0016459; GO:0030027; GO:0030175; GO:0031256; GO:0031589; GO:0038096; GO:0043325; GO:0070062; GO:0071976; GO:0072678; GO:0120117		SUBCELLULAR LOCATION: Cell membrane {ECO:0000269|PubMed:19968988, ECO:0000269|PubMed:20071333}; Peripheral membrane protein {ECO:0000269|PubMed:19968988, ECO:0000269|PubMed:20071333}. Cell projection, phagocytic cup {ECO:0000250|UniProtKB:Q5SUA5}. Note=Recruited to Fc-gamma receptor (Fc-gamma-R) phagocytic cup. In T-cells, transiently accumulates in discrete areas at the plasma membrane of migrat…				Unconventional myosin-Ig OS=Homo sapiens OX=9606 GN=MYO1G PE=1 SV=2 - [MYO1G_HUMAN]	7.56	1	5	5	6	0	1.02114e+08	3.07753e+07	2.48016	1.38	1	1	2.07274	4.52	3	3	5.00794	3.05	2	2	1018	116.369	8.73389
B7ZAQ6	GPHRA	Golgi pH regulator A (Protein GPR89A) (Putative MAPK-activating protein PM01) (Putative NF-kappa-B-activating protein 90)	FUNCTION: Voltage dependent anion channel required for acidification and functions of the Golgi apparatus that may function in counter-ion conductance. {ECO:0000250, ECO:0000269|PubMed:12761501, ECO:0000269|PubMed:18794847}.	intracellular pH reduction [GO:0051452]; positive regulation of I-kappaB kinase/NF-kappaB signaling [GO:0043123]; protein transport [GO:0015031]; regulation of ion transmembrane transport [GO:0034765]	cell [GO:0005623]; Golgi-associated vesicle membrane [GO:0030660]; Golgi cisterna membrane [GO:0032580]; integral component of membrane [GO:0016021]	cell [GO:0005623]; Golgi cisterna membrane [GO:0032580]; Golgi-associated vesicle membrane [GO:0030660]; integral component of membrane [GO:0016021]; voltage-gated anion channel activity [GO:0008308]; intracellular pH reduction [GO:0051452]; positive regulation of I-kappaB kinase/NF-kappaB signaling [GO:0043123]; protein transport [GO:0015031]; regulation of ion transmembrane transport [GO:003476…	voltage-gated anion channel activity [GO:0008308]	GO:0005623; GO:0008308; GO:0015031; GO:0016021; GO:0030660; GO:0032580; GO:0034765; GO:0043123; GO:0051452		SUBCELLULAR LOCATION: Golgi apparatus membrane {ECO:0000250}; Multi-pass membrane protein {ECO:0000250}.	TRANSMEM 5..25; /note="Helical"; /evidence="ECO:0000255"; TRANSMEM 46..66; /note="Helical"; /evidence="ECO:0000255"; TRANSMEM 79..99; /note="Helical"; /evidence="ECO:0000255"; TRANSMEM 114..134; /note="Helical"; /evidence="ECO:0000255"; TRANSMEM 150..170; /note="Helical"; /evidence="ECO:0000255"; TRANSMEM 290..310; /note="Helical"; /evidence="ECO:0000255"; TRANSMEM 343..363; /note="Helical"; /evi…			Golgi pH regulator A OS=Homo sapiens OX=9606 GN=GPR89A PE=1 SV=2 - [GPHRA_HUMAN]	5.93	1	1	1	2	1.89139e+07	2.67323e+07	0	4.79508	5.93	1	1	2.91729	5.93	1	1		0			455	52.8819	9.27588
O00115	DNS2A	Deoxyribonuclease-2-alpha (EC 3.1.22.1) (Acid DNase) (Deoxyribonuclease II alpha) (DNase II alpha) (Lysosomal DNase II) (R31240_2)	FUNCTION: Hydrolyzes DNA under acidic conditions with a preference for double-stranded DNA. Plays a major role in the degradation of nuclear DNA in cellular apoptosis during development. Necessary for proper fetal development and for definitive erythropoiesis in fetal liver, where it degrades nuclear DNA expelled from erythroid precursor cells.	apoptotic DNA fragmentation [GO:0006309]; DNA metabolic process [GO:0006259]; erythrocyte differentiation [GO:0030218]; regulation of immune response [GO:0050776]	extracellular exosome [GO:0070062]; lysosome [GO:0005764]	extracellular exosome [GO:0070062]; lysosome [GO:0005764]; deoxyribonuclease II activity [GO:0004531]; DNA binding [GO:0003677]; apoptotic DNA fragmentation [GO:0006309]; DNA metabolic process [GO:0006259]; erythrocyte differentiation [GO:0030218]; regulation of immune response [GO:0050776]	deoxyribonuclease II activity [GO:0004531]; DNA binding [GO:0003677]	GO:0003677; GO:0004531; GO:0005764; GO:0006259; GO:0006309; GO:0030218; GO:0050776; GO:0070062		SUBCELLULAR LOCATION: Lysosome.				Deoxyribonuclease-2-alpha OS=Homo sapiens OX=9606 GN=DNASE2 PE=1 SV=2 - [DNS2A_HUMAN]	13.06	1	4	4	13	1.35137e+08	1.96847e+08	1.11858e+08	8.26711	13.06	4	5	13.2112	13.06	4	5	2.35064	9.17	3	3	360	39.5555	8.04541
O00116	ADAS	Alkyldihydroxyacetonephosphate synthase, peroxisomal (Alkyl-DHAP synthase) (EC 2.5.1.26) (Aging-associated gene 5 protein) (Alkylglycerone-phosphate synthase)	FUNCTION: Catalyzes the exchange of the acyl chain in acyl-dihydroxyacetonephosphate (acyl-DHAP) for a long chain fatty alcohol, yielding the first ether linked intermediate, i.e. alkyl-dihydroxyacetonephosphate (alkyl-DHAP), in the pathway of ether lipid biosynthesis. {ECO:0000269|PubMed:8399344, ECO:0000269|PubMed:9553082}.	ether lipid biosynthetic process [GO:0008611]; lipid biosynthetic process [GO:0008610]; protein targeting to peroxisome [GO:0006625]	cytosol [GO:0005829]; membrane [GO:0016020]; mitochondrion [GO:0005739]; nucleolus [GO:0005730]; peroxisomal matrix [GO:0005782]; peroxisomal membrane [GO:0005778]; peroxisome [GO:0005777]	cytosol [GO:0005829]; membrane [GO:0016020]; mitochondrion [GO:0005739]; nucleolus [GO:0005730]; peroxisomal matrix [GO:0005782]; peroxisomal membrane [GO:0005778]; peroxisome [GO:0005777]; alkylglycerone-phosphate synthase activity [GO:0008609]; FAD binding [GO:0071949]; oxidoreductase activity [GO:0016491]; ether lipid biosynthetic process [GO:0008611]; lipid biosynthetic process [GO:0008610]; …	alkylglycerone-phosphate synthase activity [GO:0008609]; FAD binding [GO:0071949]; oxidoreductase activity [GO:0016491]	GO:0005730; GO:0005739; GO:0005777; GO:0005778; GO:0005782; GO:0005829; GO:0006625; GO:0008609; GO:0008610; GO:0008611; GO:0016020; GO:0016491; GO:0071949		SUBCELLULAR LOCATION: Peroxisome membrane {ECO:0000250|UniProtKB:P97275}. Peroxisome {ECO:0000250|UniProtKB:P97275}.				Alkyldihydroxyacetonephosphate synthase, peroxisomal OS=Homo sapiens OX=9606 GN=AGPS PE=1 SV=1 - [ADAS_HUMAN]	24.47	1	9	9	28	6.71726e+07	9.4623e+07	7.17889e+07	38.2767	22.64	8	11	33.6806	20.21	7	9	29.7551	18.39	6	8	658	72.8658	7.34229
O00148	DX39A	ATP-dependent RNA helicase DDX39A (EC 3.6.4.13) (DEAD box protein 39) (Nuclear RNA helicase URH49)	FUNCTION: [Isoform 1]: Involved in pre-mRNA splicing. Required for the export of mRNA out of the nucleus. {ECO:0000269|PubMed:15047853, ECO:0000269|PubMed:17548965}.	mRNA 3'-end processing [GO:0031124]; mRNA export from nucleus [GO:0006406]; mRNA splicing, via spliceosome [GO:0000398]; RNA export from nucleus [GO:0006405]	cytoplasm [GO:0005737]; membrane [GO:0016020]; nuclear speck [GO:0016607]; nucleoplasm [GO:0005654]; nucleus [GO:0005634]; transcription export complex [GO:0000346]	cytoplasm [GO:0005737]; membrane [GO:0016020]; nuclear speck [GO:0016607]; nucleoplasm [GO:0005654]; nucleus [GO:0005634]; transcription export complex [GO:0000346]; ATP binding [GO:0005524]; ATPase activity [GO:0016887]; identical protein binding [GO:0042802]; RNA binding [GO:0003723]; RNA helicase activity [GO:0003724]; mRNA 3'-end processing [GO:0031124]; mRNA export from nucleus [GO:0006406];…	ATPase activity [GO:0016887]; ATP binding [GO:0005524]; identical protein binding [GO:0042802]; RNA binding [GO:0003723]; RNA helicase activity [GO:0003724]	GO:0000346; GO:0000398; GO:0003723; GO:0003724; GO:0005524; GO:0005634; GO:0005654; GO:0005737; GO:0006405; GO:0006406; GO:0016020; GO:0016607; GO:0016887; GO:0031124; GO:0042802		SUBCELLULAR LOCATION: Nucleus {ECO:0000269|PubMed:21859714}. Cytoplasm {ECO:0000269|PubMed:21859714}. Note=Can translocate to the cytoplasm in the presence of MX1.				ATP-dependent RNA helicase DDX39A OS=Homo sapiens OX=9606 GN=DDX39A PE=1 SV=2 - [DX39A_HUMAN]	47.07	1	8	17	72	4.03135e+08	3.68489e+08	366706448	70.4213	43.09	13	23	74.6551	43.09	13	23	76.9816	42.39	16	26	427	49.098	5.68115
O00151	PDLI1	PDZ and LIM domain protein 1 (C-terminal LIM domain protein 1) (Elfin) (LIM domain protein CLP-36)	FUNCTION: Cytoskeletal protein that may act as an adapter that brings other proteins (like kinases) to the cytoskeleton (PubMed:10861853). Involved in assembly, disassembly and directioning of stress fibers in fibroblasts. Required for the localization of ACTN1 and PALLD to stress fibers. Required for cell migration and in maintaining cell polarity of fibroblasts (By similarity). {ECO:0000250|Uni…	actin cytoskeleton organization [GO:0030036]; heart development [GO:0007507]; muscle structure development [GO:0061061]; regulation of transcription by RNA polymerase II [GO:0006357]; response to hypoxia [GO:0001666]; response to oxidative stress [GO:0006979]	adherens junction [GO:0005912]; filamentous actin [GO:0031941]; focal adhesion [GO:0005925]; stress fiber [GO:0001725]; transcription factor complex [GO:0005667]; Z disc [GO:0030018]	adherens junction [GO:0005912]; filamentous actin [GO:0031941]; focal adhesion [GO:0005925]; stress fiber [GO:0001725]; transcription factor complex [GO:0005667]; Z disc [GO:0030018]; actin binding [GO:0003779]; cadherin binding involved in cell-cell adhesion [GO:0098641]; metal ion binding [GO:0046872]; muscle alpha-actinin binding [GO:0051371]; transcription coactivator activity [GO:0003713]; a…	actin binding [GO:0003779]; cadherin binding involved in cell-cell adhesion [GO:0098641]; metal ion binding [GO:0046872]; muscle alpha-actinin binding [GO:0051371]; transcription coactivator activity [GO:0003713]	GO:0001666; GO:0001725; GO:0003713; GO:0003779; GO:0005667; GO:0005912; GO:0005925; GO:0006357; GO:0006979; GO:0007507; GO:0030018; GO:0030036; GO:0031941; GO:0046872; GO:0051371; GO:0061061; GO:0098641		SUBCELLULAR LOCATION: Cytoplasm {ECO:0000269|PubMed:10861853, ECO:0000269|PubMed:11110697}. Cytoplasm, cytoskeleton {ECO:0000269|PubMed:10861853, ECO:0000269|PubMed:11110697}. Cytoplasm, myofibril, sarcomere, Z line {ECO:0000269|PubMed:10861853}. Note=Associates with actin stress fibers. {ECO:0000269|PubMed:11110697}.				PDZ and LIM domain protein 1 OS=Homo sapiens OX=9606 GN=PDLIM1 PE=1 SV=4 - [PDLI1_HUMAN]	59.57	1	11	11	54	1.66939e+08	1.08282e+08	2.01273e+08	70.4586	59.57	11	17	67.4564	55.02	10	16	83.346	59.57	11	21	329	36.049	7.02002
O00154	BACH	Cytosolic acyl coenzyme A thioester hydrolase (EC 3.1.2.2) (Acyl-CoA thioesterase 7) (Brain acyl-CoA hydrolase) (BACH) (hBACH) (CTE-IIa) (CTE-II) (Long chain acyl-CoA thioester hydrolase)	FUNCTION: Acyl-CoA thioesterases are a group of enzymes that catalyze the hydrolysis of acyl-CoAs to the free fatty acid and coenzyme A (CoASH), providing the potential to regulate intracellular levels of acyl-CoAs, free fatty acids and CoASH (PubMed:10578051). Acyl-coenzyme A thioesterase 7/ACOT7 preferentially hydrolyzes palmitoyl-CoA, but has a broad specificity acting on other fatty acyl-CoAs…	acyl-CoA metabolic process [GO:0006637]; coenzyme A biosynthetic process [GO:0015937]; fatty acid metabolic process [GO:0006631]; long-chain fatty-acyl-CoA catabolic process [GO:0036116]; medium-chain fatty acid biosynthetic process [GO:0051792]; medium-chain fatty-acyl-CoA catabolic process [GO:0036114]; palmitic acid biosynthetic process [GO:1900535]	cytosol [GO:0005829]; extracellular exosome [GO:0070062]; mitochondrion [GO:0005739]; nucleoplasm [GO:0005654]	cytosol [GO:0005829]; extracellular exosome [GO:0070062]; mitochondrion [GO:0005739]; nucleoplasm [GO:0005654]; acyl-CoA hydrolase activity [GO:0047617]; carboxylic ester hydrolase activity [GO:0052689]; fatty-acyl-CoA binding [GO:0000062]; long-chain fatty acyl-CoA binding [GO:0036042]; myristoyl-CoA hydrolase activity [GO:0102991]; palmitoyl-CoA hydrolase activity [GO:0016290]; protein homodime…	acyl-CoA hydrolase activity [GO:0047617]; carboxylic ester hydrolase activity [GO:0052689]; fatty-acyl-CoA binding [GO:0000062]; long-chain fatty acyl-CoA binding [GO:0036042]; myristoyl-CoA hydrolase activity [GO:0102991]; palmitoyl-CoA hydrolase activity [GO:0016290]; protein homodimerization activity [GO:0042803]	GO:0000062; GO:0005654; GO:0005739; GO:0005829; GO:0006631; GO:0006637; GO:0015937; GO:0016290; GO:0036042; GO:0036114; GO:0036116; GO:0042803; GO:0047617; GO:0051792; GO:0052689; GO:0070062; GO:0102991; GO:1900535		SUBCELLULAR LOCATION: [Isoform 4]: Cytoplasm, cytosol {ECO:0000305|PubMed:12435388}.; SUBCELLULAR LOCATION: [Isoform 6]: Cytoplasm, cytosol {ECO:0000305|PubMed:12435388}.; SUBCELLULAR LOCATION: [Isoform 1]: Mitochondrion {ECO:0000269|PubMed:12435388}.; SUBCELLULAR LOCATION: [Isoform 5]: Mitochondrion {ECO:0000269|PubMed:12435388}.				Cytosolic acyl coenzyme A thioester hydrolase OS=Homo sapiens OX=9606 GN=ACOT7 PE=1 SV=3 - [BACH_HUMAN]	29.74	1	8	8	25	1.43192e+08	1.29151e+08	1.17216e+08	26.4598	25.53	7	9	22.7661	22.37	6	8	25.5735	26.58	7	8	380	41.7693	8.54346
O00160	MYO1F	Unconventional myosin-If (Myosin-Ie)	FUNCTION: Myosins are actin-based motor molecules with ATPase activity. Unconventional myosins serve in intracellular movements. Their highly divergent tails are presumed to bind to membranous compartments, which would be moved relative to actin filaments (By similarity). {ECO:0000250}.		unconventional myosin complex [GO:0016461]	unconventional myosin complex [GO:0016461]; actin binding [GO:0003779]; ATP binding [GO:0005524]; calmodulin binding [GO:0005516]; motor activity [GO:0003774]	actin binding [GO:0003779]; ATP binding [GO:0005524]; calmodulin binding [GO:0005516]; motor activity [GO:0003774]	GO:0003774; GO:0003779; GO:0005516; GO:0005524; GO:0016461						Unconventional myosin-If OS=Homo sapiens OX=9606 GN=MYO1F PE=1 SV=3 - [MYO1F_HUMAN]	23.86	2	18	18	53	87001025	1.26785e+08	8.5687e+07	40.0603	11.75	8	15	59.1865	15.85	11	21	45.9263	17.67	13	17	1098	124.766	9.11475
O00161	SNP23	Synaptosomal-associated protein 23 (SNAP-23) (Vesicle-membrane fusion protein SNAP-23)	FUNCTION: Essential component of the high affinity receptor for the general membrane fusion machinery and an important regulator of transport vesicle docking and fusion.	antigen processing and presentation of exogenous peptide antigen via MHC class I, TAP-dependent [GO:0002479]; exocytosis [GO:0006887]; histamine secretion by mast cell [GO:0002553]; membrane fusion [GO:0061025]; neutrophil degranulation [GO:0043312]; post-Golgi vesicle-mediated transport [GO:0006892]; protein transport [GO:0015031]; synaptic vesicle fusion to presynaptic active zone membrane [GO:…	adherens junction [GO:0005912]; azurophil granule [GO:0042582]; cell [GO:0005623]; cytoplasm [GO:0005737]; extracellular exosome [GO:0070062]; focal adhesion [GO:0005925]; mast cell granule [GO:0042629]; mitochondrion [GO:0005739]; neuron projection [GO:0043005]; nucleoplasm [GO:0005654]; phagocytic vesicle membrane [GO:0030670]; plasma membrane [GO:0005886]; presynapse [GO:0098793]; SNARE comple…	adherens junction [GO:0005912]; azurophil granule [GO:0042582]; cell [GO:0005623]; cytoplasm [GO:0005737]; extracellular exosome [GO:0070062]; focal adhesion [GO:0005925]; mast cell granule [GO:0042629]; mitochondrion [GO:0005739]; neuron projection [GO:0043005]; nucleoplasm [GO:0005654]; phagocytic vesicle membrane [GO:0030670]; plasma membrane [GO:0005886]; presynapse [GO:0098793]; SNARE comple…	SNAP receptor activity [GO:0005484]; syntaxin binding [GO:0019905]	GO:0002479; GO:0002553; GO:0005484; GO:0005623; GO:0005654; GO:0005737; GO:0005739; GO:0005886; GO:0005912; GO:0005925; GO:0006887; GO:0006892; GO:0006903; GO:0006906; GO:0015031; GO:0016082; GO:0019905; GO:0030670; GO:0031201; GO:0031629; GO:0035579; GO:0042581; GO:0042582; GO:0042629; GO:0043005; GO:0043312; GO:0061025; GO:0070062; GO:0070821; GO:0098793		SUBCELLULAR LOCATION: Cell membrane; Peripheral membrane protein. Cell membrane; Lipid-anchor. Cell junction, synapse, synaptosome. Note=Mainly localized to the plasma membrane.				Synaptosomal-associated protein 23 OS=Homo sapiens OX=9606 GN=SNAP23 PE=1 SV=1 - [SNP23_HUMAN]	25.12	1	3	3	8	1.89569e+07	7.1171e+07	3.98738e+07	7.5383	18.48	2	3	5.91463	6.64	1	2	10.2869	25.12	3	3	211	23.3395	5.0083
O00165	HAX1	HCLS1-associated protein X-1 (HS1-associating protein X-1) (HAX-1) (HS1-binding protein 1) (HSP1BP-1)	FUNCTION: Recruits the Arp2/3 complex to the cell cortex and regulates reorganization of the cortical actin cytoskeleton via its interaction with KCNC3 and the Arp2/3 complex (PubMed:26997484). Slows down the rate of inactivation of KCNC3 channels (PubMed:26997484). Promotes GNA13-mediated cell migration. Involved in the clathrin-mediated endocytosis pathway. May be involved in internalization of…	cellular response to cytokine stimulus [GO:0071345]; negative regulation of apoptotic process [GO:0043066]; positive regulation of actin cytoskeleton reorganization [GO:2000251]; positive regulation of granulocyte differentiation [GO:0030854]; positive regulation of peptidyl-serine phosphorylation [GO:0033138]; positive regulation of peptidyl-tyrosine phosphorylation [GO:0050731]; positive regula…	actin cytoskeleton [GO:0015629]; cell cortex [GO:0005938]; cytoplasmic vesicle [GO:0031410]; endoplasmic reticulum [GO:0005783]; lamellipodium [GO:0030027]; mitochondrial intermembrane space [GO:0005758]; mitochondrial outer membrane [GO:0005741]; mitochondrion [GO:0005739]; nuclear envelope [GO:0005635]; nuclear membrane [GO:0031965]; P-body [GO:0000932]; plasma membrane [GO:0005886]; sarcoplasm…	actin cytoskeleton [GO:0015629]; cell cortex [GO:0005938]; cytoplasmic vesicle [GO:0031410]; endoplasmic reticulum [GO:0005783]; lamellipodium [GO:0030027]; mitochondrial intermembrane space [GO:0005758]; mitochondrial outer membrane [GO:0005741]; mitochondrion [GO:0005739]; nuclear envelope [GO:0005635]; nuclear membrane [GO:0031965]; P-body [GO:0000932]; plasma membrane [GO:0005886]; sarcoplasm…	interleukin-1 binding [GO:0019966]; protein N-terminus binding [GO:0047485]	GO:0000932; GO:0005635; GO:0005667; GO:0005739; GO:0005741; GO:0005758; GO:0005783; GO:0005886; GO:0005938; GO:0014068; GO:0015629; GO:0016529; GO:0019966; GO:0030027; GO:0030833; GO:0030854; GO:0031410; GO:0031965; GO:0033138; GO:0042981; GO:0043066; GO:0045944; GO:0047485; GO:0050731; GO:0051897; GO:0071345; GO:1903146; GO:1903214; GO:2000251		SUBCELLULAR LOCATION: Mitochondrion {ECO:0000269|PubMed:18971376, ECO:0000269|PubMed:9058808}. Endoplasmic reticulum {ECO:0000269|PubMed:18971376, ECO:0000269|PubMed:9058808}. Nucleus membrane {ECO:0000269|PubMed:9058808}. Cytoplasmic vesicle {ECO:0000250|UniProtKB:O35387}. Cytoplasm, cell cortex {ECO:0000269|PubMed:26997484}. Cell membrane {ECO:0000269|PubMed:26997484}; Peripheral membrane prote…				HCLS1-associated protein X-1 OS=Homo sapiens OX=9606 GN=HAX1 PE=1 SV=2 - [HAX1_HUMAN]	3.94	1	1	1	2	2.49674e+07	0	6.74268e+06	2.92116	3.94	1	1		0			2.93089	3.94	1	1	279	31.6011	4.91943
O00170	AIP	AH receptor-interacting protein (AIP) (Aryl-hydrocarbon receptor-interacting protein) (HBV X-associated protein 2) (XAP-2) (Immunophilin homolog ARA9)	FUNCTION: May play a positive role in AHR-mediated (aromatic hydrocarbon receptor) signaling, possibly by influencing its receptivity for ligand and/or its nuclear targeting.; FUNCTION: Cellular negative regulator of the hepatitis B virus (HBV) X protein.	interleukin-12-mediated signaling pathway [GO:0035722]; negative regulation of cyclic-nucleotide phosphodiesterase activity [GO:0051344]; protein maturation by protein folding [GO:0022417]; protein targeting to mitochondrion [GO:0006626]; regulation of protein kinase A signaling [GO:0010738]; xenobiotic metabolic process [GO:0006805]	aryl hydrocarbon receptor complex [GO:0034751]; cytoplasm [GO:0005737]; cytosol [GO:0005829]; membrane [GO:0016020]; nucleoplasm [GO:0005654]	aryl hydrocarbon receptor complex [GO:0034751]; cytoplasm [GO:0005737]; cytosol [GO:0005829]; membrane [GO:0016020]; nucleoplasm [GO:0005654]; aryl hydrocarbon receptor binding [GO:0017162]; GAF domain binding [GO:0036004]; peptidyl-prolyl cis-trans isomerase activity [GO:0003755]; transcription coactivator activity [GO:0003713]; transcription factor binding [GO:0008134]; unfolded protein binding…	aryl hydrocarbon receptor binding [GO:0017162]; GAF domain binding [GO:0036004]; peptidyl-prolyl cis-trans isomerase activity [GO:0003755]; transcription coactivator activity [GO:0003713]; transcription factor binding [GO:0008134]; unfolded protein binding [GO:0051082]	GO:0003713; GO:0003755; GO:0005654; GO:0005737; GO:0005829; GO:0006626; GO:0006805; GO:0008134; GO:0010738; GO:0016020; GO:0017162; GO:0022417; GO:0034751; GO:0035722; GO:0036004; GO:0051082; GO:0051344		SUBCELLULAR LOCATION: Cytoplasm.				AH receptor-interacting protein OS=Homo sapiens OX=9606 GN=AIP PE=1 SV=2 - [AIP_HUMAN]	15.76	1	4	4	9	4.38637e+07	5.95935e+07	3.37828e+07	11.2477	15.76	4	4	6.39191	7.58	2	2	8.86298	12.12	3	3	330	37.6121	6.29053
O00178	GTPB1	GTP-binding protein 1 (G-protein 1) (GP-1) (GP1)	FUNCTION: Promotes degradation of target mRNA species. Plays a role in the regulation of circadian mRNA stability. Binds GTP and has GTPase activity (By similarity). {ECO:0000250}.	GTP metabolic process [GO:0046039]; immune response [GO:0006955]; positive regulation of mRNA catabolic process [GO:0061014]; signal transduction [GO:0007165]; translational elongation [GO:0006414]	cytoplasmic exosome (RNase complex) [GO:0000177]; cytosol [GO:0005829]; membrane [GO:0016020]	cytoplasmic exosome (RNase complex) [GO:0000177]; cytosol [GO:0005829]; membrane [GO:0016020]; GTP binding [GO:0005525]; GTPase activity [GO:0003924]; RNA binding [GO:0003723]; translation elongation factor activity [GO:0003746]; GTP metabolic process [GO:0046039]; immune response [GO:0006955]; positive regulation of mRNA catabolic process [GO:0061014]; signal transduction [GO:0007165]; translati…	GTPase activity [GO:0003924]; GTP binding [GO:0005525]; RNA binding [GO:0003723]; translation elongation factor activity [GO:0003746]	GO:0000177; GO:0003723; GO:0003746; GO:0003924; GO:0005525; GO:0005829; GO:0006414; GO:0006955; GO:0007165; GO:0016020; GO:0046039; GO:0061014		SUBCELLULAR LOCATION: Cytoplasm {ECO:0000250}.				GTP-binding protein 1 OS=Homo sapiens OX=9606 GN=GTPBP1 PE=1 SV=3 - [GTPB1_HUMAN]	15.7	1	7	7	13	2.01927e+07	3.28961e+07	1.58868e+07	6.04506	8.37	3	3	14.8777	12.56	6	6	9.93996	9.27	4	4	669	72.408	8.33838
O00182	LEG9	Galectin-9 (Gal-9) (Ecalectin) (Tumor antigen HOM-HD-21)	FUNCTION: Binds galactosides (PubMed:18005988). Has high affinity for the Forssman pentasaccharide (PubMed:18005988). Ligand for HAVCR2/TIM3 (PubMed:16286920). Binding to HAVCR2 induces T-helper type 1 lymphocyte (Th1) death (PubMed:16286920). Also stimulates bactericidal activity in infected macrophages by causing macrophage activation and IL1B secretion which restricts intracellular bacterial g…	cellular response to interferon-gamma [GO:0071346]; cellular response to virus [GO:0098586]; chemotaxis [GO:0006935]; ERK1 and ERK2 cascade [GO:0070371]; female pregnancy [GO:0007565]; inflammatory response [GO:0006954]; maternal process involved in female pregnancy [GO:0060135]; natural killer cell tolerance induction [GO:0002519]; negative regulation of activated T cell proliferation [GO:004600…	collagen-containing extracellular matrix [GO:0062023]; cytoplasm [GO:0005737]; cytosol [GO:0005829]; extracellular space [GO:0005615]; nucleus [GO:0005634]	collagen-containing extracellular matrix [GO:0062023]; cytoplasm [GO:0005737]; cytosol [GO:0005829]; extracellular space [GO:0005615]; nucleus [GO:0005634]; carbohydrate binding [GO:0030246]; disaccharide binding [GO:0048030]; enzyme binding [GO:0019899]; galactose binding [GO:0005534]; galactoside binding [GO:0016936]; cellular response to interferon-gamma [GO:0071346]; cellular response to viru…	carbohydrate binding [GO:0030246]; disaccharide binding [GO:0048030]; enzyme binding [GO:0019899]; galactose binding [GO:0005534]; galactoside binding [GO:0016936]	GO:0002519; GO:0005534; GO:0005615; GO:0005634; GO:0005737; GO:0005829; GO:0006935; GO:0006954; GO:0007565; GO:0010628; GO:0010629; GO:0016936; GO:0019899; GO:0030246; GO:0032496; GO:0032682; GO:0032689; GO:0032720; GO:0032753; GO:0032834; GO:0038066; GO:0043123; GO:0043305; GO:0045953; GO:0046007; GO:0046598; GO:0048030; GO:0050718; GO:0051092; GO:0060135; GO:0062023; GO:0070241; GO:0070371; GO:…		SUBCELLULAR LOCATION: Cytoplasm {ECO:0000269|PubMed:23242525}. Nucleus {ECO:0000269|PubMed:23242525}. Secreted {ECO:0000269|PubMed:23817958, ECO:0000269|PubMed:25578313}. Note=May also be secreted by a non-classical secretory pathway (By similarity). Secreted by mesenchymal stromal cells upon IFNG stimulation (PubMed:23817958). {ECO:0000250|UniProtKB:O08573, ECO:0000269|PubMed:23817958}.; SUBCELL…				Galectin-9 OS=Homo sapiens OX=9606 GN=LGALS9 PE=1 SV=2 - [LEG9_HUMAN]	32.68	1	5	10	39	4.65111e+08	498143285	3.46488e+08	30.8929	23.94	7	12	43.5377	30.42	9	15	41.0441	23.1	7	12	355	39.4929	9.17334
O00186	STXB3	Syntaxin-binding protein 3 (Platelet Sec1 protein) (PSP) (Protein unc-18 homolog 3) (Unc18-3) (Protein unc-18 homolog C) (Unc-18C)	FUNCTION: Together with STX4 and VAMP2, may play a role in insulin-dependent movement of GLUT4 and in docking/fusion of intracellular GLUT4-containing vesicles with the cell surface in adipocytes. {ECO:0000250}.	brain development [GO:0007420]; cellular glucose homeostasis [GO:0001678]; cellular response to interferon-gamma [GO:0071346]; insulin secretion [GO:0030073]; negative regulation of calcium ion-dependent exocytosis [GO:0045955]; negative regulation of glucose import [GO:0046325]; neutrophil degranulation [GO:0043312]; platelet aggregation [GO:0070527]; protein to membrane docking [GO:0022615]; re…	apical plasma membrane [GO:0016324]; basolateral plasma membrane [GO:0016323]; cell [GO:0005623]; cytosol [GO:0005829]; extracellular exosome [GO:0070062]; phagocytic vesicle [GO:0045335]; plasma membrane [GO:0005886]; platelet alpha granule [GO:0031091]; presynapse [GO:0098793]; specific granule [GO:0042581]; tertiary granule [GO:0070820]	apical plasma membrane [GO:0016324]; basolateral plasma membrane [GO:0016323]; cell [GO:0005623]; cytosol [GO:0005829]; extracellular exosome [GO:0070062]; phagocytic vesicle [GO:0045335]; plasma membrane [GO:0005886]; platelet alpha granule [GO:0031091]; presynapse [GO:0098793]; specific granule [GO:0042581]; tertiary granule [GO:0070820]; protein-containing complex binding [GO:0044877]; syntaxi…	protein-containing complex binding [GO:0044877]; syntaxin-1 binding [GO:0017075]; syntaxin binding [GO:0019905]	GO:0001678; GO:0005623; GO:0005829; GO:0005886; GO:0006904; GO:0007420; GO:0016323; GO:0016324; GO:0017075; GO:0019905; GO:0022615; GO:0030073; GO:0031091; GO:0032868; GO:0042581; GO:0043312; GO:0044877; GO:0045335; GO:0045955; GO:0046325; GO:0070062; GO:0070527; GO:0070820; GO:0071346; GO:0098793		SUBCELLULAR LOCATION: Cytoplasm, cytosol {ECO:0000269|PubMed:10194441}. Cell membrane {ECO:0000269|PubMed:10194441}. Note=In platelets, predominantly cytosolic. Low amounts membrane-associated.				Syntaxin-binding protein 3 OS=Homo sapiens OX=9606 GN=STXBP3 PE=1 SV=2 - [STXB3_HUMAN]	8.61	1	3	3	8	3.61412e+07	4.01644e+06	2.60973e+07	2.01825	4.39	2	2	7.09313	8.61	3	3	6.69052	8.61	3	3	592	67.7208	7.79639
O00193	SMAP	Small acidic protein												Small acidic protein OS=Homo sapiens OX=9606 GN=SMAP PE=1 SV=1 - [SMAP_HUMAN]	22.4	1	3	3	6	3.90093e+07	4.40864e+07	5.91732e+07	10.8152	22.4	3	3	7.96432	9.29	2	2	3.1217	9.29	1	1	183	20.3202	4.71631
O00203	AP3B1	AP-3 complex subunit beta-1 (Adaptor protein complex AP-3 subunit beta-1) (Adaptor-related protein complex 3 subunit beta-1) (Beta-3A-adaptin) (Clathrin assembly protein complex 3 beta-1 large chain)	FUNCTION: Subunit of non-clathrin- and clathrin-associated adaptor protein complex 3 (AP-3) that plays a role in protein sorting in the late-Golgi/trans-Golgi network (TGN) and/or endosomes. The AP complexes mediate both the recruitment of clathrin to membranes and the recognition of sorting signals within the cytosolic tails of transmembrane cargo molecules. AP-3 appears to be involved in the so…	anterograde axonal transport [GO:0008089]; anterograde synaptic vesicle transport [GO:0048490]; antigen processing and presentation, exogenous lipid antigen via MHC class Ib [GO:0048007]; blood coagulation [GO:0007596]; intracellular protein transport [GO:0006886]; melanosome organization [GO:0032438]; positive regulation of NK T cell differentiation [GO:0051138]; protein targeting to lysosome [G…	AP-3 adaptor complex [GO:0030123]; axon cytoplasm [GO:1904115]; cell [GO:0005623]; clathrin adaptor complex [GO:0030131]; clathrin-coated vesicle membrane [GO:0030665]; Golgi apparatus [GO:0005794]; lysosomal membrane [GO:0005765]; membrane [GO:0016020]; synapse [GO:0045202]	AP-3 adaptor complex [GO:0030123]; axon cytoplasm [GO:1904115]; cell [GO:0005623]; clathrin adaptor complex [GO:0030131]; clathrin-coated vesicle membrane [GO:0030665]; Golgi apparatus [GO:0005794]; lysosomal membrane [GO:0005765]; membrane [GO:0016020]; synapse [GO:0045202]; GTP-dependent protein binding [GO:0030742]; protein phosphatase binding [GO:0019903]; anterograde axonal transport [GO:000…	GTP-dependent protein binding [GO:0030742]; protein phosphatase binding [GO:0019903]	GO:0005623; GO:0005765; GO:0005794; GO:0006622; GO:0006886; GO:0007596; GO:0008089; GO:0016020; GO:0016182; GO:0016192; GO:0019903; GO:0030123; GO:0030131; GO:0030665; GO:0030742; GO:0032438; GO:0045202; GO:0048007; GO:0048490; GO:0051138; GO:1904115		SUBCELLULAR LOCATION: Cytoplasmic vesicle, clathrin-coated vesicle membrane {ECO:0000250}; Peripheral membrane protein {ECO:0000250}; Cytoplasmic side {ECO:0000250}. Golgi apparatus {ECO:0000250}. Note=Component of the coat surrounding the cytoplasmic face of coated vesicles located at the Golgi complex. {ECO:0000250}.				AP-3 complex subunit beta-1 OS=Homo sapiens OX=9606 GN=AP3B1 PE=1 SV=3 - [AP3B1_HUMAN]	14.53	2	10	10	25	8.64477e+07	76182618	4.86305e+07	19.45	8.87	7	10	19.1791	12.52	8	8	15.8262	7.86	6	7	1094	121.245	6.03662
O00214	LEG8	Galectin-8 (Gal-8) (Po66 carbohydrate-binding protein) (Po66-CBP) (Prostate carcinoma tumor antigen 1) (PCTA-1)	FUNCTION: Beta-galactoside-binding lectin that acts as a sensor of membrane damage caused by infection and restricts the proliferation of infecting pathogens by targeting them for autophagy (PubMed:22246324, PubMed:28077878). Detects membrane rupture by binding beta-galactoside ligands located on the lumenal side of the endosome membrane; these ligands becoming exposed to the cytoplasm following …	cellular response to virus [GO:0098586]; lymphatic endothelial cell migration [GO:1904977]; xenophagy [GO:0098792]	cytoplasm [GO:0005737]; cytoplasmic vesicle [GO:0031410]; cytosol [GO:0005829]; extracellular space [GO:0005615]; membrane [GO:0016020]	cytoplasm [GO:0005737]; cytoplasmic vesicle [GO:0031410]; cytosol [GO:0005829]; extracellular space [GO:0005615]; membrane [GO:0016020]; carbohydrate binding [GO:0030246]; integrin binding [GO:0005178]; cellular response to virus [GO:0098586]; lymphatic endothelial cell migration [GO:1904977]; xenophagy [GO:0098792]	carbohydrate binding [GO:0030246]; integrin binding [GO:0005178]	GO:0005178; GO:0005615; GO:0005737; GO:0005829; GO:0016020; GO:0030246; GO:0031410; GO:0098586; GO:0098792; GO:1904977		SUBCELLULAR LOCATION: Cytoplasmic vesicle {ECO:0000269|PubMed:22246324}. Cytoplasm, cytosol {ECO:0000269|PubMed:22246324}.				Galectin-8 OS=Homo sapiens OX=9606 GN=LGALS8 PE=1 SV=4 - [LEG8_HUMAN]	9.15	1	3	3	3	0	5.80204e+06	1.79944e+07		0			1.96708	6.31	2	2	0	2.84	1	1	317	35.7855	8.25049
O00217	NDUS8	NADH dehydrogenase [ubiquinone] iron-sulfur protein 8, mitochondrial (EC 1.6.99.3) (EC 7.1.1.2) (Complex I-23kD) (CI-23kD) (NADH-ubiquinone oxidoreductase 23 kDa subunit) (TYKY subunit)	FUNCTION: Core subunit of the mitochondrial membrane respiratory chain NADH dehydrogenase (Complex I) that is believed to belong to the minimal assembly required for catalysis. Complex I functions in the transfer of electrons from NADH to the respiratory chain. The immediate electron acceptor for the enzyme is believed to be ubiquinone (By similarity). May donate electrons to ubiquinone. {ECO:000…	aerobic respiration [GO:0009060]; mitochondrial electron transport, NADH to ubiquinone [GO:0006120]; mitochondrial respiratory chain complex I assembly [GO:0032981]; response to oxidative stress [GO:0006979]	mitochondrial matrix [GO:0005759]; mitochondrial respiratory chain complex I [GO:0005747]; mitochondrion [GO:0005739]	mitochondrial matrix [GO:0005759]; mitochondrial respiratory chain complex I [GO:0005747]; mitochondrion [GO:0005739]; 4 iron, 4 sulfur cluster binding [GO:0051539]; metal ion binding [GO:0046872]; NADH dehydrogenase (ubiquinone) activity [GO:0008137]; aerobic respiration [GO:0009060]; mitochondrial electron transport, NADH to ubiquinone [GO:0006120]; mitochondrial respiratory chain complex I ass…	4 iron, 4 sulfur cluster binding [GO:0051539]; metal ion binding [GO:0046872]; NADH dehydrogenase (ubiquinone) activity [GO:0008137]	GO:0005739; GO:0005747; GO:0005759; GO:0006120; GO:0006979; GO:0008137; GO:0009060; GO:0032981; GO:0046872; GO:0051539		SUBCELLULAR LOCATION: Mitochondrion {ECO:0000305}.				NADH dehydrogenase [ubiquinone] iron-sulfur protein 8, mitochondrial OS=Homo sapiens OX=9606 GN=NDUFS8 PE=1 SV=1 - [NDUS8_HUMAN]	4.29	1	1	1	4	3.89873e+06	1.66068e+07	2.66762e+07	0	4.29	1	1	1.89088	4.29	1	1	3.89606	4.29	1	2	210	23.6896	6.34131
O00221	IKBE	NF-kappa-B inhibitor epsilon (NF-kappa-BIE) (I-kappa-B-epsilon) (IkB-E) (IkB-epsilon) (IkappaBepsilon)	FUNCTION: Inhibits NF-kappa-B by complexing with and trapping it in the cytoplasm. Inhibits DNA-binding of NF-kappa-B p50-p65 and p50-c-Rel complexes. {ECO:0000269|PubMed:9315679}.	cytoplasmic sequestering of transcription factor [GO:0042994]; D-serine transport [GO:0042942]	cytoplasm [GO:0005737]; cytosol [GO:0005829]; fibrillar center [GO:0001650]; Golgi apparatus [GO:0005794]; nucleoplasm [GO:0005654]; perinuclear region of cytoplasm [GO:0048471]	cytoplasm [GO:0005737]; cytosol [GO:0005829]; fibrillar center [GO:0001650]; Golgi apparatus [GO:0005794]; nucleoplasm [GO:0005654]; perinuclear region of cytoplasm [GO:0048471]; cytoplasmic sequestering of transcription factor [GO:0042994]; D-serine transport [GO:0042942]		GO:0001650; GO:0005654; GO:0005737; GO:0005794; GO:0005829; GO:0042942; GO:0042994; GO:0048471		SUBCELLULAR LOCATION: Cytoplasm {ECO:0000250}.				NF-kappa-B inhibitor epsilon OS=Homo sapiens OX=9606 GN=NFKBIE PE=1 SV=3 - [IKBE_HUMAN]	4.8	1	1	1	5	9.56154e+06	1.32551e+07	7.3677e+06	2.79206	4.8	1	2	5.68292	4.8	1	2	2.58843	4.8	1	1	500	52.8309	6.68311
O00231	PSD11	26S proteasome non-ATPase regulatory subunit 11 (26S proteasome regulatory subunit RPN6) (26S proteasome regulatory subunit S9) (26S proteasome regulatory subunit p44.5)	FUNCTION: Component of the 26S proteasome, a multiprotein complex involved in the ATP-dependent degradation of ubiquitinated proteins. This complex plays a key role in the maintenance of protein homeostasis by removing misfolded or damaged proteins, which could impair cellular functions, and by removing proteins whose functions are no longer required. Therefore, the proteasome participates in num…	anaphase-promoting complex-dependent catabolic process [GO:0031145]; antigen processing and presentation of exogenous peptide antigen via MHC class I, TAP-dependent [GO:0002479]; Fc-epsilon receptor signaling pathway [GO:0038095]; interleukin-1-mediated signaling pathway [GO:0070498]; MAPK cascade [GO:0000165]; negative regulation of canonical Wnt signaling pathway [GO:0090090]; negative regulati…	cytosol [GO:0005829]; extracellular region [GO:0005576]; ficolin-1-rich granule lumen [GO:1904813]; membrane [GO:0016020]; nucleoplasm [GO:0005654]; nucleus [GO:0005634]; proteasome accessory complex [GO:0022624]; proteasome complex [GO:0000502]; proteasome regulatory particle, lid subcomplex [GO:0008541]; secretory granule lumen [GO:0034774]	cytosol [GO:0005829]; extracellular region [GO:0005576]; ficolin-1-rich granule lumen [GO:1904813]; membrane [GO:0016020]; nucleoplasm [GO:0005654]; nucleus [GO:0005634]; proteasome accessory complex [GO:0022624]; proteasome complex [GO:0000502]; proteasome regulatory particle, lid subcomplex [GO:0008541]; secretory granule lumen [GO:0034774]; structural molecule activity [GO:0005198]; anaphase-p…	structural molecule activity [GO:0005198]	GO:0000165; GO:0000209; GO:0000502; GO:0002223; GO:0002479; GO:0005198; GO:0005576; GO:0005634; GO:0005654; GO:0005829; GO:0006511; GO:0006521; GO:0008541; GO:0010972; GO:0016020; GO:0016579; GO:0022624; GO:0031145; GO:0031146; GO:0033209; GO:0034774; GO:0038061; GO:0038095; GO:0043161; GO:0043248; GO:0043312; GO:0043488; GO:0043687; GO:0048863; GO:0050852; GO:0055085; GO:0060071; GO:0061418; GO:…		SUBCELLULAR LOCATION: Nucleus {ECO:0000250}. Cytoplasm, cytosol {ECO:0000250}.				26S proteasome non-ATPase regulatory subunit 11 OS=Homo sapiens OX=9606 GN=PSMD11 PE=1 SV=3 - [PSD11_HUMAN]	45.26	1	14	14	46	2.79614e+08	2.25509e+08	113620121	52.0578	27.73	9	17	42.6703	28.2	9	15	36.4837	38.63	11	14	422	47.434	6.48096
O00232	PSD12	26S proteasome non-ATPase regulatory subunit 12 (26S proteasome regulatory subunit RPN5) (26S proteasome regulatory subunit p55)	FUNCTION: Component of the 26S proteasome, a multiprotein complex involved in the ATP-dependent degradation of ubiquitinated proteins. This complex plays a key role in the maintenance of protein homeostasis by removing misfolded or damaged proteins, which could impair cellular functions, and by removing proteins whose functions are no longer required. Therefore, the proteasome participates in num…	anaphase-promoting complex-dependent catabolic process [GO:0031145]; antigen processing and presentation of exogenous peptide antigen via MHC class I, TAP-dependent [GO:0002479]; Fc-epsilon receptor signaling pathway [GO:0038095]; interleukin-1-mediated signaling pathway [GO:0070498]; MAPK cascade [GO:0000165]; negative regulation of canonical Wnt signaling pathway [GO:0090090]; negative regulati…	cytoplasm [GO:0005737]; cytosol [GO:0005829]; extracellular exosome [GO:0070062]; extracellular region [GO:0005576]; ficolin-1-rich granule lumen [GO:1904813]; membrane [GO:0016020]; nuclear proteasome complex [GO:0031595]; nucleoplasm [GO:0005654]; proteasome accessory complex [GO:0022624]; proteasome complex [GO:0000502]; proteasome regulatory particle [GO:0005838]; proteasome regulatory partic…	cytoplasm [GO:0005737]; cytosol [GO:0005829]; extracellular exosome [GO:0070062]; extracellular region [GO:0005576]; ficolin-1-rich granule lumen [GO:1904813]; membrane [GO:0016020]; nuclear proteasome complex [GO:0031595]; nucleoplasm [GO:0005654]; proteasome accessory complex [GO:0022624]; proteasome complex [GO:0000502]; proteasome regulatory particle [GO:0005838]; proteasome regulatory partic…		GO:0000165; GO:0000209; GO:0000502; GO:0002223; GO:0002479; GO:0005576; GO:0005654; GO:0005737; GO:0005829; GO:0005838; GO:0006521; GO:0008541; GO:0010972; GO:0016020; GO:0016579; GO:0022624; GO:0031145; GO:0031146; GO:0031595; GO:0033209; GO:0034774; GO:0038061; GO:0038095; GO:0043161; GO:0043312; GO:0043488; GO:0043687; GO:0050852; GO:0055085; GO:0060071; GO:0061418; GO:0070062; GO:0070498; GO:…						26S proteasome non-ATPase regulatory subunit 12 OS=Homo sapiens OX=9606 GN=PSMD12 PE=1 SV=3 - [PSD12_HUMAN]	42.11	1	17	17	69	2.16934e+08	1.96177e+08	1.35537e+08	72.9797	35.09	13	26	58.9393	33.55	12	20	54.8266	30.7	13	23	456	52.8706	7.6499
O00233	PSMD9	26S proteasome non-ATPase regulatory subunit 9 (26S proteasome regulatory subunit p27)	FUNCTION: Acts as a chaperone during the assembly of the 26S proteasome, specifically of the base subcomplex of the PA700/19S regulatory complex (RC). During the base subcomplex assembly is part of an intermediate PSMD9:PSMC6:PSMC3 module, also known as modulator trimer complex; PSMD9 is released during the further base assembly process. {ECO:0000269|PubMed:19490896}.	anaphase-promoting complex-dependent catabolic process [GO:0031145]; antigen processing and presentation of exogenous peptide antigen via MHC class I, TAP-dependent [GO:0002479]; Fc-epsilon receptor signaling pathway [GO:0038095]; interleukin-1-mediated signaling pathway [GO:0070498]; MAPK cascade [GO:0000165]; negative regulation of canonical Wnt signaling pathway [GO:0090090]; negative regulati…	cytoplasm [GO:0005737]; cytosol [GO:0005829]; nucleoplasm [GO:0005654]; nucleus [GO:0005634]; proteasome regulatory particle [GO:0005838]	cytoplasm [GO:0005737]; cytosol [GO:0005829]; nucleoplasm [GO:0005654]; nucleus [GO:0005634]; proteasome regulatory particle [GO:0005838]; bHLH transcription factor binding [GO:0043425]; transcription coactivator activity [GO:0003713]; anaphase-promoting complex-dependent catabolic process [GO:0031145]; antigen processing and presentation of exogenous peptide antigen via MHC class I, TAP-dependen…	bHLH transcription factor binding [GO:0043425]; transcription coactivator activity [GO:0003713]	GO:0000165; GO:0000209; GO:0002223; GO:0002479; GO:0003713; GO:0005634; GO:0005654; GO:0005737; GO:0005829; GO:0005838; GO:0006511; GO:0006521; GO:0010972; GO:0016579; GO:0031145; GO:0031146; GO:0032024; GO:0033209; GO:0038061; GO:0038095; GO:0043161; GO:0043425; GO:0043488; GO:0043687; GO:0045893; GO:0046676; GO:0050852; GO:0055085; GO:0060071; GO:0061418; GO:0070498; GO:0070682; GO:0090090; GO:…						26S proteasome non-ATPase regulatory subunit 9 OS=Homo sapiens OX=9606 GN=PSMD9 PE=1 SV=3 - [PSMD9_HUMAN]	9.87	1	3	3	5	7.42447e+06	1.01289e+07	7.2647e+06	4.74647	5.38	2	2	5.24629	9.42	2	2	2.59247	4.48	1	1	223	24.6665	6.94678
O00244	ATOX1	Copper transport protein ATOX1 (Metal transport protein ATX1)	FUNCTION: Binds and deliver cytosolic copper to the copper ATPase proteins. May be important in cellular antioxidant defense.	cellular copper ion homeostasis [GO:0006878]; copper ion export [GO:0060003]; copper ion transport [GO:0006825]; negative regulation of apoptotic process [GO:0043066]; response to oxidative stress [GO:0006979]	cell [GO:0005623]; cytosol [GO:0005829]	cell [GO:0005623]; cytosol [GO:0005829]; ATPase binding [GO:0051117]; copper chaperone activity [GO:0016531]; copper ion binding [GO:0005507]; copper-dependent protein binding [GO:0032767]; metallochaperone activity [GO:0016530]; cellular copper ion homeostasis [GO:0006878]; copper ion export [GO:0060003]; copper ion transport [GO:0006825]; negative regulation of apoptotic process [GO:0043066]; r…	ATPase binding [GO:0051117]; copper chaperone activity [GO:0016531]; copper-dependent protein binding [GO:0032767]; copper ion binding [GO:0005507]; metallochaperone activity [GO:0016530]	GO:0005507; GO:0005623; GO:0005829; GO:0006825; GO:0006878; GO:0006979; GO:0016530; GO:0016531; GO:0032767; GO:0043066; GO:0051117; GO:0060003						Copper transport protein ATOX1 OS=Homo sapiens OX=9606 GN=ATOX1 PE=1 SV=1 - [ATOX1_HUMAN]	13.24	1	2	2	6	7.86425e+07	104437333	74241845	6.68874	13.24	2	3	4.26509	13.24	2	2	1.9647	11.76	1	1	68	7.39674	7.23975
O00264	PGRC1	Membrane-associated progesterone receptor component 1 (mPR) (Dap1) (IZA)	FUNCTION: Component of a progesterone-binding protein complex (PubMed:28396637). Binds progesterone (PubMed:25675345). Has many reported cellular functions (heme homeostasis, interaction with CYPs). Required for the maintenance of uterine histoarchitecture and normal female reproductive lifespan (By similarity). Intracellular heme chaperone. Regulates heme synthesis via interactions with FECH and…	heme biosynthetic process [GO:0006783]; neutrophil degranulation [GO:0043312]	cell body [GO:0044297]; endomembrane system [GO:0012505]; endoplasmic reticulum [GO:0005783]; integral component of plasma membrane [GO:0005887]; membrane [GO:0016020]; mitochondrial outer membrane [GO:0005741]; neuronal cell body [GO:0043025]; neuron projection [GO:0043005]; plasma membrane [GO:0005886]; smooth endoplasmic reticulum membrane [GO:0030868]; specific granule membrane [GO:0035579]; …	cell body [GO:0044297]; endomembrane system [GO:0012505]; endoplasmic reticulum [GO:0005783]; integral component of plasma membrane [GO:0005887]; membrane [GO:0016020]; mitochondrial outer membrane [GO:0005741]; neuron projection [GO:0043005]; neuronal cell body [GO:0043025]; plasma membrane [GO:0005886]; smooth endoplasmic reticulum membrane [GO:0030868]; specific granule membrane [GO:0035579]; …	amyloid-beta binding [GO:0001540]; heme binding [GO:0020037]; protein homodimerization activity [GO:0042803]; steroid binding [GO:0005496]	GO:0001540; GO:0005496; GO:0005741; GO:0005783; GO:0005886; GO:0005887; GO:0006783; GO:0012505; GO:0016020; GO:0020037; GO:0030868; GO:0035579; GO:0042803; GO:0043005; GO:0043025; GO:0043312; GO:0044297; GO:0045202		SUBCELLULAR LOCATION: Microsome membrane {ECO:0000250|UniProtKB:Q95250}; Single-pass membrane protein {ECO:0000255}. Smooth endoplasmic reticulum membrane {ECO:0000303|PubMed:28396637}; Single-pass membrane protein {ECO:0000255}. Mitochondrion outer membrane {ECO:0000250|UniProtKB:O55022}; Single-pass membrane protein {ECO:0000305}; Extracellular side {ECO:0000250|UniProtKB:O55022}.	TRANSMEM 25..43; /note="Helical"; /evidence="ECO:0000255"			Membrane-associated progesterone receptor component 1 OS=Homo sapiens OX=9606 GN=PGRMC1 PE=1 SV=3 - [PGRC1_HUMAN]	39.49	1	3	4	18	7.18097e+07	7.76209e+07	8.68763e+07	16.7985	32.31	3	4	29.6491	39.49	4	8	18.8914	39.49	4	6	195	21.6578	4.70361
O00267	SPT5H	Transcription elongation factor SPT5 (hSPT5) (DRB sensitivity-inducing factor 160 kDa subunit) (DSIF p160) (DRB sensitivity-inducing factor large subunit) (DSIF large subunit) (Tat-cotransactivator 1 protein) (Tat-CT1 protein)	FUNCTION: Component of the DRB sensitivity-inducing factor complex (DSIF complex), which regulates mRNA processing and transcription elongation by RNA polymerase II. DSIF positively regulates mRNA capping by stimulating the mRNA guanylyltransferase activity of RNGTT/CAP1A. DSIF also acts cooperatively with the negative elongation factor complex (NELF complex) to enhance transcriptional pausing at…	7-methylguanosine mRNA capping [GO:0006370]; negative regulation of DNA-templated transcription, elongation [GO:0032785]; negative regulation of mRNA polyadenylation [GO:1900364]; negative regulation of transcription by RNA polymerase II [GO:0000122]; positive regulation of DNA-templated transcription, elongation [GO:0032786]; positive regulation of macroautophagy [GO:0016239]; positive regulatio…	DSIF complex [GO:0032044]; nucleoplasm [GO:0005654]; nucleus [GO:0005634]	DSIF complex [GO:0032044]; nucleoplasm [GO:0005654]; nucleus [GO:0005634]; chromatin binding [GO:0003682]; enzyme binding [GO:0019899]; mRNA binding [GO:0003729]; protein heterodimerization activity [GO:0046982]; RNA binding [GO:0003723]; 7-methylguanosine mRNA capping [GO:0006370]; negative regulation of DNA-templated transcription, elongation [GO:0032785]; negative regulation of mRNA polyadenyl…	chromatin binding [GO:0003682]; enzyme binding [GO:0019899]; mRNA binding [GO:0003729]; protein heterodimerization activity [GO:0046982]; RNA binding [GO:0003723]	GO:0000122; GO:0003682; GO:0003723; GO:0003729; GO:0005634; GO:0005654; GO:0006357; GO:0006366; GO:0006368; GO:0006370; GO:0016239; GO:0019899; GO:0032044; GO:0032785; GO:0032786; GO:0045944; GO:0046982; GO:0050434; GO:1900364		SUBCELLULAR LOCATION: Nucleus {ECO:0000269|PubMed:10075709}.				Transcription elongation factor SPT5 OS=Homo sapiens OX=9606 GN=SUPT5H PE=1 SV=1 - [SPT5H_HUMAN]	2.76	1	2	2	3	0	20005266	3.72564e+07		0			3.0502	1.29	1	1	5.94357	2.76	2	2	1087	120.925	5.05908
O00273	DFFA	DNA fragmentation factor subunit alpha (DNA fragmentation factor 45 kDa subunit) (DFF-45) (Inhibitor of CAD) (ICAD)	FUNCTION: Inhibitor of the caspase-activated DNase (DFF40).	apoptotic DNA fragmentation [GO:0006309]; chaperone-mediated protein folding [GO:0061077]; negative regulation of apoptotic DNA fragmentation [GO:1902511]; negative regulation of deoxyribonuclease activity [GO:0032076]; negative regulation of execution phase of apoptosis [GO:1900118]; positive regulation of apoptotic process [GO:0043065]; regulation of apoptotic process [GO:0042981]; thymocyte ap…	cytosol [GO:0005829]; nuclear chromatin [GO:0000790]; nucleoplasm [GO:0005654]; nucleus [GO:0005634]; plasma membrane [GO:0005886]; protein-containing complex [GO:0032991]	cytosol [GO:0005829]; nuclear chromatin [GO:0000790]; nucleoplasm [GO:0005654]; nucleus [GO:0005634]; plasma membrane [GO:0005886]; protein-containing complex [GO:0032991]; deoxyribonuclease inhibitor activity [GO:0060703]; protein domain specific binding [GO:0019904]; protein folding chaperone [GO:0044183]; apoptotic DNA fragmentation [GO:0006309]; chaperone-mediated protein folding [GO:0061077]…	deoxyribonuclease inhibitor activity [GO:0060703]; protein domain specific binding [GO:0019904]; protein folding chaperone [GO:0044183]	GO:0000790; GO:0005634; GO:0005654; GO:0005829; GO:0005886; GO:0006309; GO:0019904; GO:0032076; GO:0032991; GO:0042981; GO:0043065; GO:0044183; GO:0060703; GO:0061077; GO:0070242; GO:1900118; GO:1902511		SUBCELLULAR LOCATION: Cytoplasm.				DNA fragmentation factor subunit alpha OS=Homo sapiens OX=9606 GN=DFFA PE=1 SV=1 - [DFFA_HUMAN]	5.14	1	1	1	3	9.8883e+06	0	2.14733e+07	3.42126	5.14	1	1	2.73612	5.14	1	1	2.51002	5.14	1	1	331	36.4995	4.79248
O00303	EIF3F	Eukaryotic translation initiation factor 3 subunit F (eIF3f) (Deubiquitinating enzyme eIF3f) (EC 3.4.19.12) (Eukaryotic translation initiation factor 3 subunit 5) (eIF-3-epsilon) (eIF3 p47)	FUNCTION: Component of the eukaryotic translation initiation factor 3 (eIF-3) complex, which is required for several steps in the initiation of protein synthesis (PubMed:17581632, PubMed:25849773, PubMed:27462815). The eIF-3 complex associates with the 40S ribosome and facilitates the recruitment of eIF-1, eIF-1A, eIF-2:GTP:methionyl-tRNAi and eIF-5 to form the 43S pre-initiation complex (43S PIC…	formation of cytoplasmic translation initiation complex [GO:0001732]; IRES-dependent viral translational initiation [GO:0075522]; protein deubiquitination [GO:0016579]; translational initiation [GO:0006413]	cytosol [GO:0005829]; eukaryotic 43S preinitiation complex [GO:0016282]; eukaryotic 48S preinitiation complex [GO:0033290]; eukaryotic translation initiation factor 3 complex [GO:0005852]; eukaryotic translation initiation factor 3 complex, eIF3m [GO:0071541]; membrane [GO:0016020]	cytosol [GO:0005829]; eukaryotic 43S preinitiation complex [GO:0016282]; eukaryotic 48S preinitiation complex [GO:0033290]; eukaryotic translation initiation factor 3 complex [GO:0005852]; eukaryotic translation initiation factor 3 complex, eIF3m [GO:0071541]; membrane [GO:0016020]; thiol-dependent ubiquitin-specific protease activity [GO:0004843]; translation initiation factor activity [GO:00037…	thiol-dependent ubiquitin-specific protease activity [GO:0004843]; translation initiation factor activity [GO:0003743]; translation initiation factor binding [GO:0031369]	GO:0001732; GO:0003743; GO:0004843; GO:0005829; GO:0005852; GO:0006413; GO:0016020; GO:0016282; GO:0016579; GO:0031369; GO:0033290; GO:0071541; GO:0075522		SUBCELLULAR LOCATION: Cytoplasm {ECO:0000255|HAMAP-Rule:MF_03005}.				Eukaryotic translation initiation factor 3 subunit F OS=Homo sapiens OX=9606 GN=EIF3F PE=1 SV=1 - [EIF3F_HUMAN]	34.45	1	9	9	41	267434910	2.14493e+08	1.72532e+08	42.5919	25.21	7	15	48.1412	34.45	9	16	29.6695	20.73	6	10	357	37.5402	5.45264
O00329	PK3CD	Phosphatidylinositol 4,5-bisphosphate 3-kinase catalytic subunit delta isoform (PI3-kinase subunit delta) (PI3K-delta) (PI3Kdelta) (PtdIns-3-kinase subunit delta) (EC 2.7.1.153) (Phosphatidylinositol 4,5-bisphosphate 3-kinase 110 kDa catalytic subunit delta) (PtdIns-3-kinase subunit p110-delta) (p110delta)	FUNCTION: Phosphoinositide-3-kinase (PI3K) that phosphorylates PtdIns(4,5)P2 (Phosphatidylinositol 4,5-bisphosphate) to generate phosphatidylinositol 3,4,5-trisphosphate (PIP3). PIP3 plays a key role by recruiting PH domain-containing proteins to the membrane, including AKT1 and PDPK1, activating signaling cascades involved in cell growth, survival, proliferation, motility and morphology. Mediate…	adaptive immune response [GO:0002250]; axon guidance [GO:0007411]; B cell activation [GO:0042113]; B cell chemotaxis [GO:0035754]; B cell receptor signaling pathway [GO:0050853]; cell migration [GO:0016477]; cytokine-mediated signaling pathway [GO:0019221]; cytokine production [GO:0001816]; inflammatory response [GO:0006954]; innate immune response [GO:0045087]; mast cell chemotaxis [GO:0002551];…	cytoplasm [GO:0005737]; cytosol [GO:0005829]; mast cell granule [GO:0042629]; membrane [GO:0016020]; phosphatidylinositol 3-kinase complex [GO:0005942]; plasma membrane [GO:0005886]	cytoplasm [GO:0005737]; cytosol [GO:0005829]; mast cell granule [GO:0042629]; membrane [GO:0016020]; phosphatidylinositol 3-kinase complex [GO:0005942]; plasma membrane [GO:0005886]; 1-phosphatidylinositol-3-kinase activity [GO:0016303]; 1-phosphatidylinositol-4-phosphate 3-kinase activity [GO:0035005]; ATP binding [GO:0005524]; kinase activity [GO:0016301]; phosphatidylinositol 3-kinase activity…	1-phosphatidylinositol-3-kinase activity [GO:0016303]; 1-phosphatidylinositol-4-phosphate 3-kinase activity [GO:0035005]; ATP binding [GO:0005524]; kinase activity [GO:0016301]; phosphatidylinositol-3,4-bisphosphate 5-kinase activity [GO:0052812]; phosphatidylinositol 3-kinase activity [GO:0035004]; phosphatidylinositol-4,5-bisphosphate 3-kinase activity [GO:0046934]; phosphatidylinositol kinase …	GO:0001779; GO:0001816; GO:0002250; GO:0002551; GO:0002679; GO:0005524; GO:0005737; GO:0005829; GO:0005886; GO:0005942; GO:0006468; GO:0006661; GO:0006954; GO:0007165; GO:0007411; GO:0010628; GO:0010629; GO:0010818; GO:0014065; GO:0014068; GO:0016020; GO:0016301; GO:0016303; GO:0016310; GO:0016477; GO:0019221; GO:0030101; GO:0030217; GO:0030335; GO:0030593; GO:0033031; GO:0035004; GO:0035005; GO:…		SUBCELLULAR LOCATION: Cytoplasm {ECO:0000269|PubMed:22020336}.				Phosphatidylinositol 4,5-bisphosphate 3-kinase catalytic subunit delta isoform OS=Homo sapiens OX=9606 GN=PIK3CD PE=1 SV=2 - [PK3CD_HUMAN]	0.77	2	1	1	3	8.61702e+06	21054468	16984359	1.93185	0.77	1	1	2.1865	0.77	1	1	1.98164	0.77	1	1	1044	119.402	7.18115
O00330	ODPX	Pyruvate dehydrogenase protein X component, mitochondrial (Dihydrolipoamide dehydrogenase-binding protein of pyruvate dehydrogenase complex) (E3-binding protein) (E3BP) (Lipoyl-containing pyruvate dehydrogenase complex component X) (proX)	FUNCTION: Required for anchoring dihydrolipoamide dehydrogenase (E3) to the dihydrolipoamide transacetylase (E2) core of the pyruvate dehydrogenase complexes of eukaryotes. This specific binding is essential for a functional PDH complex.	mitochondrial acetyl-CoA biosynthetic process from pyruvate [GO:0061732]; pyruvate metabolic process [GO:0006090]	mitochondrial matrix [GO:0005759]; pyruvate dehydrogenase complex [GO:0045254]	mitochondrial matrix [GO:0005759]; pyruvate dehydrogenase complex [GO:0045254]; transferase activity, transferring acyl groups [GO:0016746]; mitochondrial acetyl-CoA biosynthetic process from pyruvate [GO:0061732]; pyruvate metabolic process [GO:0006090]	transferase activity, transferring acyl groups [GO:0016746]	GO:0005759; GO:0006090; GO:0016746; GO:0045254; GO:0061732		SUBCELLULAR LOCATION: Mitochondrion matrix.				Pyruvate dehydrogenase protein X component, mitochondrial OS=Homo sapiens OX=9606 GN=PDHX PE=1 SV=3 - [ODPX_HUMAN]	2.79	1	1	1	3	1.61064e+07	1.66766e+07	9.40499e+06	3.90724	2.79	1	1	3.71465	2.79	1	1	2.61983	2.79	1	1	501	54.0888	8.66064
O00410	IPO5	Importin-5 (Imp5) (Importin subunit beta-3) (Karyopherin beta-3) (Ran-binding protein 5) (RanBP5)	FUNCTION: Functions in nuclear protein import as nuclear transport receptor. Serves as receptor for nuclear localization signals (NLS) in cargo substrates. Is thought to mediate docking of the importin/substrate complex to the nuclear pore complex (NPC) through binding to nucleoporin and the complex is subsequently translocated through the pore by an energy requiring, Ran-dependent mechanism. At …	cellular response to amino acid stimulus [GO:0071230]; negative regulation of cyclin-dependent protein serine/threonine kinase activity [GO:0045736]; NLS-bearing protein import into nucleus [GO:0006607]; positive regulation of protein import into nucleus [GO:0042307]; protein import into nucleus [GO:0006606]; ribosomal protein import into nucleus [GO:0006610]; viral process [GO:0016032]	cytoplasm [GO:0005737]; membrane [GO:0016020]; nuclear pore [GO:0005643]; nucleolus [GO:0005730]; nucleus [GO:0005634]	cytoplasm [GO:0005737]; membrane [GO:0016020]; nuclear pore [GO:0005643]; nucleolus [GO:0005730]; nucleus [GO:0005634]; GTPase inhibitor activity [GO:0005095]; nuclear import signal receptor activity [GO:0061608]; nuclear localization sequence binding [GO:0008139]; Ran GTPase binding [GO:0008536]; RNA binding [GO:0003723]; cellular response to amino acid stimulus [GO:0071230]; negative regulation…	GTPase inhibitor activity [GO:0005095]; nuclear import signal receptor activity [GO:0061608]; nuclear localization sequence binding [GO:0008139]; Ran GTPase binding [GO:0008536]; RNA binding [GO:0003723]	GO:0003723; GO:0005095; GO:0005634; GO:0005643; GO:0005730; GO:0005737; GO:0006606; GO:0006607; GO:0006610; GO:0008139; GO:0008536; GO:0016020; GO:0016032; GO:0042307; GO:0045736; GO:0061608; GO:0071230		SUBCELLULAR LOCATION: Cytoplasm. Nucleus. Nucleus, nucleolus. Note=Nucleus; nuclear rim. Found particularly in the nuclear rim and nucleolus.				Importin-5 OS=Homo sapiens OX=9606 GN=IPO5 PE=1 SV=4 - [IPO5_HUMAN]	35.1	1	22	24	62	1.06654e+08	8.93891e+07	9.56389e+07	60.6819	20.51	15	21	42.0083	21.42	14	18	55.7535	21.33	17	23	1097	123.55	4.94482
O00422	SAP18	Histone deacetylase complex subunit SAP18 (18 kDa Sin3-associated polypeptide) (2HOR0202) (Cell growth-inhibiting gene 38 protein) (Sin3-associated polypeptide p18)	FUNCTION: Component of the SIN3-repressing complex. Enhances the ability of SIN3-HDAC1-mediated transcriptional repression. When tethered to the promoter, it can direct the formation of a repressive complex to core histone proteins. Auxiliary component of the splicing-dependent multiprotein exon junction complex (EJC) deposited at splice junction on mRNAs. The EJC is a dynamic structure consistin…	mRNA processing [GO:0006397]; negative regulation of mRNA splicing, via spliceosome [GO:0048025]; positive regulation of apoptotic process [GO:0043065]; regulation of alternative mRNA splicing, via spliceosome [GO:0000381]; regulation of transcription by RNA polymerase II [GO:0006357]; RNA splicing [GO:0008380]	ASAP complex [GO:0061574]; cytosol [GO:0005829]; histone deacetylase complex [GO:0000118]; nuclear body [GO:0016604]; nuclear speck [GO:0016607]; nucleoplasm [GO:0005654]	ASAP complex [GO:0061574]; cytosol [GO:0005829]; histone deacetylase complex [GO:0000118]; nuclear body [GO:0016604]; nuclear speck [GO:0016607]; nucleoplasm [GO:0005654]; RNA binding [GO:0003723]; transcription corepressor activity [GO:0003714]; mRNA processing [GO:0006397]; negative regulation of mRNA splicing, via spliceosome [GO:0048025]; positive regulation of apoptotic process [GO:0043065];…	RNA binding [GO:0003723]; transcription corepressor activity [GO:0003714]	GO:0000118; GO:0000381; GO:0003714; GO:0003723; GO:0005654; GO:0005829; GO:0006357; GO:0006397; GO:0008380; GO:0016604; GO:0016607; GO:0043065; GO:0048025; GO:0061574		SUBCELLULAR LOCATION: Nucleus {ECO:0000269|PubMed:16314458}. Cytoplasm {ECO:0000269|PubMed:16314458}. Nucleus speckle {ECO:0000269|PubMed:20966198}. Note=Shuttles between the nucleus and the cytoplasm (PubMed:16314458). Colocalizes with ACIN1 and SRSF2 in nuclear speckles (PubMed:20966198). {ECO:0000269|PubMed:16314458, ECO:0000269|PubMed:20966198}.				Histone deacetylase complex subunit SAP18 OS=Homo sapiens OX=9606 GN=SAP18 PE=1 SV=1 - [SAP18_HUMAN]	20.92	1	2	2	9	1.1328e+07	2.06948e+07	0	5.01801	20.92	2	2	11.834	20.92	2	4	5.28773	12.42	1	3	153	17.55	9.34912
O00429	DNM1L	Dynamin-1-like protein (EC 3.6.5.5) (Dnm1p/Vps1p-like protein) (DVLP) (Dynamin family member proline-rich carboxyl-terminal domain less) (Dymple) (Dynamin-like protein) (Dynamin-like protein 4) (Dynamin-like protein IV) (HdynIV) (Dynamin-related protein 1)	FUNCTION: Functions in mitochondrial and peroxisomal division. Mediates membrane fission through oligomerization into membrane-associated tubular structures that wrap around the scission site to constrict and sever the mitochondrial membrane through a GTP hydrolysis-dependent mechanism. The specific recruitment at scission sites is mediated by membrane receptors like MFF, MIEF1 and MIEF2 for mito…	apoptotic mitochondrial changes [GO:0008637]; calcium ion transport [GO:0006816]; cellular response to oxygen-glucose deprivation [GO:0090650]; cellular response to thapsigargin [GO:1904579]; dynamin family protein polymerization involved in mitochondrial fission [GO:0003374]; execution phase of apoptosis [GO:0097194]; heart contraction [GO:0060047]; intracellular distribution of mitochondria [GO…	brush border [GO:0005903]; cell junction [GO:0030054]; clathrin-coated pit [GO:0005905]; cytoplasm [GO:0005737]; cytosol [GO:0005829]; endoplasmic reticulum [GO:0005783]; endoplasmic reticulum membrane [GO:0005789]; Golgi apparatus [GO:0005794]; Golgi membrane [GO:0000139]; intracellular membrane-bounded organelle [GO:0043231]; membrane [GO:0016020]; microtubule [GO:0005874]; mitochondrial outer …	brush border [GO:0005903]; cell junction [GO:0030054]; clathrin-coated pit [GO:0005905]; cytoplasm [GO:0005737]; cytosol [GO:0005829]; endoplasmic reticulum [GO:0005783]; endoplasmic reticulum membrane [GO:0005789]; Golgi apparatus [GO:0005794]; Golgi membrane [GO:0000139]; intracellular membrane-bounded organelle [GO:0043231]; membrane [GO:0016020]; microtubule [GO:0005874]; mitochondrial outer …	BH2 domain binding [GO:0051433]; clathrin binding [GO:0030276]; GTPase activator activity [GO:0005096]; GTPase activity [GO:0003924]; GTP binding [GO:0005525]; GTP-dependent protein binding [GO:0030742]; identical protein binding [GO:0042802]; lipid binding [GO:0008289]; microtubule binding [GO:0008017]; protein-containing complex binding [GO:0044877]; protein homodimerization activity [GO:004280…	GO:0000139; GO:0000266; GO:0001836; GO:0003374; GO:0003924; GO:0005096; GO:0005525; GO:0005737; GO:0005739; GO:0005741; GO:0005777; GO:0005783; GO:0005789; GO:0005794; GO:0005829; GO:0005874; GO:0005903; GO:0005905; GO:0006816; GO:0007005; GO:0008017; GO:0008289; GO:0008637; GO:0010468; GO:0010637; GO:0010821; GO:0016020; GO:0016559; GO:0017137; GO:0030054; GO:0030276; GO:0030672; GO:0030742; GO:…		SUBCELLULAR LOCATION: Cytoplasm, cytosol. Golgi apparatus. Endomembrane system; Peripheral membrane protein. Mitochondrion outer membrane {ECO:0000269|PubMed:26122121, ECO:0000269|PubMed:27145208, ECO:0000269|PubMed:28969390}; Peripheral membrane protein. Peroxisome. Membrane, clathrin-coated pit {ECO:0000250}. Cytoplasmic vesicle, secretory vesicle, synaptic vesicle membrane {ECO:0000250|UniProt…				Dynamin-1-like protein OS=Homo sapiens OX=9606 GN=DNM1L PE=1 SV=2 - [DNM1L_HUMAN]	39.27	1	19	19	88	1.19303e+08	1.20232e+08	1.01534e+08	94.8807	36.68	17	33	85.4513	33.42	16	28	79.3811	30.3	14	27	736	81.8261	6.81494
O00442	RTCA	RNA 3'-terminal phosphate cyclase (RNA cyclase) (RNA-3'-phosphate cyclase) (EC 6.5.1.4) (RNA terminal phosphate cyclase domain-containing protein 1) (RTC domain-containing protein 1)	FUNCTION: Catalyzes the conversion of 3'-phosphate to a 2',3'-cyclic phosphodiester at the end of RNA. The mechanism of action of the enzyme occurs in 3 steps: (A) adenylation of the enzyme by ATP; (B) transfer of adenylate to an RNA-N3'P to produce RNA-N3'PP5'A; (C) and attack of the adjacent 2'-hydroxyl on the 3'-phosphorus in the diester linkage to produce the cyclic end product. The biologica…	RNA processing [GO:0006396]	nucleoplasm [GO:0005654]; nucleus [GO:0005634]	nucleoplasm [GO:0005654]; nucleus [GO:0005634]; ATP binding [GO:0005524]; RNA binding [GO:0003723]; RNA-3'-phosphate cyclase activity [GO:0003963]; RNA processing [GO:0006396]	ATP binding [GO:0005524]; RNA-3'-phosphate cyclase activity [GO:0003963]; RNA binding [GO:0003723]	GO:0003723; GO:0003963; GO:0005524; GO:0005634; GO:0005654; GO:0006396		SUBCELLULAR LOCATION: Nucleus, nucleoplasm.				RNA 3'-terminal phosphate cyclase OS=Homo sapiens OX=9606 GN=RTCA PE=1 SV=1 - [RTCA_HUMAN]	24.59	1	8	8	32	1.34127e+08	1.00631e+08	1.04942e+08	25.1035	17.49	5	11	27.7844	19.67	6	11	25.2834	16.94	5	10	366	39.3114	7.85498
O00479	HMGN4	High mobility group nucleosome-binding domain-containing protein 4 (Non-histone chromosomal protein HMG-17-like 3) (Non-histone chromosomal protein)			chromatin [GO:0000785]; nucleus [GO:0005634]	chromatin [GO:0000785]; nucleus [GO:0005634]; nucleosomal DNA binding [GO:0031492]	nucleosomal DNA binding [GO:0031492]	GO:0000785; GO:0005634; GO:0031492		SUBCELLULAR LOCATION: Nucleus {ECO:0000250}.				High mobility group nucleosome-binding domain-containing protein 4 OS=Homo sapiens OX=9606 GN=HMGN4 PE=1 SV=3 - [HMGN4_HUMAN]	12.22	1	1	1	1	0	0	3.82344e+07		0				0			2.69718	12.22	1	1	90	9.53323	10.4771
O00483	NDUA4	Cytochrome c oxidase subunit NDUFA4 (Complex I-MLRQ) (CI-MLRQ) (NADH-ubiquinone oxidoreductase MLRQ subunit)	FUNCTION: Component of the cytochrome c oxidase, the last enzyme in the mitochondrial electron transport chain which drives oxidative phosphorylation. The respiratory chain contains 3 multisubunit complexes succinate dehydrogenase (complex II, CII), ubiquinol-cytochrome c oxidoreductase (cytochrome b-c1 complex, complex III, CIII) and cytochrome c oxidase (complex IV, CIV), that cooperate to tran…	mitochondrial electron transport, cytochrome c to oxygen [GO:0006123]; mitochondrial electron transport, NADH to ubiquinone [GO:0006120]; proton transmembrane transport [GO:1902600]	integral component of membrane [GO:0016021]; mitochondrial inner membrane [GO:0005743]; mitochondrial respiratory chain complex I [GO:0005747]; mitochondrial respiratory chain complex IV [GO:0005751]; mitochondrion [GO:0005739]	integral component of membrane [GO:0016021]; mitochondrial inner membrane [GO:0005743]; mitochondrial respiratory chain complex I [GO:0005747]; mitochondrial respiratory chain complex IV [GO:0005751]; mitochondrion [GO:0005739]; NADH dehydrogenase (ubiquinone) activity [GO:0008137]; protein-containing complex binding [GO:0044877]; mitochondrial electron transport, cytochrome c to oxygen [GO:00061…	NADH dehydrogenase (ubiquinone) activity [GO:0008137]; protein-containing complex binding [GO:0044877]	GO:0005739; GO:0005743; GO:0005747; GO:0005751; GO:0006120; GO:0006123; GO:0008137; GO:0016021; GO:0044877; GO:1902600		SUBCELLULAR LOCATION: Mitochondrion inner membrane {ECO:0000269|PubMed:23746447, ECO:0000269|PubMed:30030519}; Single-pass membrane protein {ECO:0000269|PubMed:30030519}.	TRANSMEM 15..37; /note="Helical"; /evidence="ECO:0000269|PubMed:30030519"			Cytochrome c oxidase subunit NDUFA4 OS=Homo sapiens OX=9606 GN=NDUFA4 PE=1 SV=1 - [NDUA4_HUMAN]	12.35	1	1	1	2	36371440	52072501	0	0	12.35	1	1	0	12.35	1	1		0			81	9.36391	9.37842
O00487	PSDE	26S proteasome non-ATPase regulatory subunit 14 (EC 3.4.19.-) (26S proteasome regulatory subunit RPN11) (26S proteasome-associated PAD1 homolog 1)	FUNCTION: Component of the 26S proteasome, a multiprotein complex involved in the ATP-dependent degradation of ubiquitinated proteins. This complex plays a key role in the maintenance of protein homeostasis by removing misfolded or damaged proteins, which could impair cellular functions, and by removing proteins whose functions are no longer required. Therefore, the proteasome participates in num…	anaphase-promoting complex-dependent catabolic process [GO:0031145]; antigen processing and presentation of exogenous peptide antigen via MHC class I, TAP-dependent [GO:0002479]; double-strand break repair via homologous recombination [GO:0000724]; double-strand break repair via nonhomologous end joining [GO:0006303]; Fc-epsilon receptor signaling pathway [GO:0038095]; interleukin-1-mediated sign…	cytosol [GO:0005829]; cytosolic proteasome complex [GO:0031597]; extracellular region [GO:0005576]; ficolin-1-rich granule lumen [GO:1904813]; nucleoplasm [GO:0005654]; nucleus [GO:0005634]; proteasome accessory complex [GO:0022624]; proteasome complex [GO:0000502]; proteasome regulatory particle, lid subcomplex [GO:0008541]; secretory granule lumen [GO:0034774]	cytosol [GO:0005829]; cytosolic proteasome complex [GO:0031597]; extracellular region [GO:0005576]; ficolin-1-rich granule lumen [GO:1904813]; nucleoplasm [GO:0005654]; nucleus [GO:0005634]; proteasome accessory complex [GO:0022624]; proteasome complex [GO:0000502]; proteasome regulatory particle, lid subcomplex [GO:0008541]; secretory granule lumen [GO:0034774]; endopeptidase activator activity …	endopeptidase activator activity [GO:0061133]; Lys63-specific deubiquitinase activity [GO:0061578]; metal ion binding [GO:0046872]; metallopeptidase activity [GO:0008237]; proteasome binding [GO:0070628]; thiol-dependent ubiquitin-specific protease activity [GO:0004843]; thiol-dependent ubiquitinyl hydrolase activity [GO:0036459]	GO:0000165; GO:0000209; GO:0000502; GO:0000724; GO:0002223; GO:0002479; GO:0004843; GO:0005576; GO:0005634; GO:0005654; GO:0005829; GO:0006303; GO:0006511; GO:0006521; GO:0008237; GO:0008541; GO:0010972; GO:0016579; GO:0022624; GO:0031145; GO:0031146; GO:0031597; GO:0033209; GO:0034774; GO:0036459; GO:0038061; GO:0038095; GO:0043161; GO:0043312; GO:0043488; GO:0043687; GO:0045471; GO:0046872; GO:…						26S proteasome non-ATPase regulatory subunit 14 OS=Homo sapiens OX=9606 GN=PSMD14 PE=1 SV=1 - [PSDE_HUMAN]	46.77	1	9	9	30	3.07135e+08	361196087	1.99716e+08	42.5546	42.9	8	14	27.2299	19.35	2	8	28.4614	27.74	4	8	310	34.5546	6.52197
O00499	BIN1	Myc box-dependent-interacting protein 1 (Amphiphysin II) (Amphiphysin-like protein) (Box-dependent myc-interacting protein 1) (Bridging integrator 1)	FUNCTION: Is a key player in the control of plasma membrane curvature, membrane shaping and membrane remodeling. Required in muscle cells for the formation of T-tubules, tubular invaginations of the plasma membrane that function in depolarization-contraction coupling (PubMed:24755653). Is a negative regulator of endocytosis (By similarity). Is also involved in the regulation of intracellular vesi…	cytoskeleton organization [GO:0007010]; endocytosis [GO:0006897]; endosome to lysosome transport [GO:0008333]; lipid tube assembly [GO:0060988]; membrane organization [GO:0061024]; negative regulation of amyloid-beta formation [GO:1902430]; negative regulation of aspartic-type endopeptidase activity involved in amyloid precursor protein catabolic process [GO:1902960]; negative regulation of calci…	actin cytoskeleton [GO:0015629]; axon [GO:0030424]; axon initial segment [GO:0043194]; cytoplasm [GO:0005737]; cytosol [GO:0005829]; endosome [GO:0005768]; I band [GO:0031674]; lipid tube [GO:0060987]; membrane [GO:0016020]; node of Ranvier [GO:0033268]; nuclear envelope [GO:0005635]; nucleus [GO:0005634]; plasma membrane [GO:0005886]; synaptic vesicle [GO:0008021]; T-tubule [GO:0030315]; Z disc …	actin cytoskeleton [GO:0015629]; axon [GO:0030424]; axon initial segment [GO:0043194]; cytoplasm [GO:0005737]; cytosol [GO:0005829]; endosome [GO:0005768]; I band [GO:0031674]; lipid tube [GO:0060987]; membrane [GO:0016020]; node of Ranvier [GO:0033268]; nuclear envelope [GO:0005635]; nucleus [GO:0005634]; plasma membrane [GO:0005886]; synaptic vesicle [GO:0008021]; T-tubule [GO:0030315]; Z disc …	actin filament binding [GO:0051015]; aspartic-type endopeptidase inhibitor activity [GO:0019828]; chaperone binding [GO:0051087]; clathrin binding [GO:0030276]; identical protein binding [GO:0042802]; phospholipid binding [GO:0005543]; protease binding [GO:0002020]; RNA polymerase binding [GO:0070063]; tau protein binding [GO:0048156]	GO:0002020; GO:0005543; GO:0005634; GO:0005635; GO:0005737; GO:0005768; GO:0005829; GO:0005886; GO:0006897; GO:0006997; GO:0007010; GO:0008021; GO:0008333; GO:0015629; GO:0016020; GO:0016032; GO:0019828; GO:0030018; GO:0030100; GO:0030276; GO:0030315; GO:0030424; GO:0030838; GO:0031674; GO:0033268; GO:0033292; GO:0042802; GO:0043065; GO:0043194; GO:0045664; GO:0048156; GO:0048711; GO:0051015; GO:…		SUBCELLULAR LOCATION: [Isoform BIN1]: Nucleus {ECO:0000269|PubMed:8782822}. Cytoplasm {ECO:0000269|PubMed:9182667}. Endosome {ECO:0000250|UniProtKB:O08539}. Cell membrane, sarcolemma, T-tubule {ECO:0000250|UniProtKB:O08839}.; SUBCELLULAR LOCATION: [Isoform IIA]: Cytoplasm {ECO:0000269|PubMed:9182667}.				Myc box-dependent-interacting protein 1 OS=Homo sapiens OX=9606 GN=BIN1 PE=1 SV=1 - [BIN1_HUMAN]	7.42	1	2	2	2	0	0	1.8985e+07		0				0			0	7.42	2	2	593	64.6594	5.05908
O00505	IMA4	Importin subunit alpha-4 (Importin alpha Q2) (Qip2) (Karyopherin subunit alpha-3) (SRP1-gamma)	FUNCTION: Functions in nuclear protein import as an adapter protein for nuclear receptor KPNB1. Binds specifically and directly to substrates containing either a simple or bipartite NLS motif. Docking of the importin/substrate complex to the nuclear pore complex (NPC) is mediated by KPNB1 through binding to nucleoporin FxFG repeats and the complex is subsequently translocated through the pore by …	modulation by virus of host cellular process [GO:0019054]; NLS-bearing protein import into nucleus [GO:0006607]; protein-containing complex assembly [GO:0065003]; viral entry into host cell [GO:0046718]; viral penetration into host nucleus [GO:0075732]	cytosol [GO:0005829]; host cell [GO:0043657]; nuclear pore [GO:0005643]; nucleoplasm [GO:0005654]	cytosol [GO:0005829]; host cell [GO:0043657]; nuclear pore [GO:0005643]; nucleoplasm [GO:0005654]; nuclear import signal receptor activity [GO:0061608]; nuclear localization sequence binding [GO:0008139]; protein C-terminus binding [GO:0008022]; modulation by virus of host cellular process [GO:0019054]; NLS-bearing protein import into nucleus [GO:0006607]; protein-containing complex assembly [GO:…	nuclear import signal receptor activity [GO:0061608]; nuclear localization sequence binding [GO:0008139]; protein C-terminus binding [GO:0008022]	GO:0005643; GO:0005654; GO:0005829; GO:0006607; GO:0008022; GO:0008139; GO:0019054; GO:0043657; GO:0046718; GO:0061608; GO:0065003; GO:0075732		SUBCELLULAR LOCATION: Cytoplasm {ECO:0000250}. Nucleus {ECO:0000250}.				Importin subunit alpha-4 OS=Homo sapiens OX=9606 GN=KPNA3 PE=1 SV=2 - [IMA4_HUMAN]	24.76	1	5	7	29	9.34587e+07	1.09011e+08	6.69709e+07	30.8485	21.69	6	11	25.8129	19.96	6	9	26.6122	17.27	5	9	521	57.7748	4.94482
O00512	BCL9	B-cell CLL/lymphoma 9 protein (B-cell lymphoma 9 protein) (Bcl-9) (Protein legless homolog)	FUNCTION: Involved in signal transduction through the Wnt pathway. Promotes beta-catenin's transcriptional activity (By similarity). {ECO:0000250, ECO:0000269|PubMed:11955446}.	beta-catenin-TCF complex assembly [GO:1904837]; canonical Wnt signaling pathway [GO:0060070]; myotube differentiation involved in skeletal muscle regeneration [GO:0014908]; positive regulation of transcription by RNA polymerase II [GO:0045944]; skeletal muscle cell differentiation [GO:0035914]; somatic stem cell population maintenance [GO:0035019]	beta-catenin-TCF complex [GO:1990907]; cis-Golgi network [GO:0005801]; nucleoplasm [GO:0005654]	beta-catenin-TCF complex [GO:1990907]; cis-Golgi network [GO:0005801]; nucleoplasm [GO:0005654]; beta-catenin binding [GO:0008013]; transcription coactivator activity [GO:0003713]; beta-catenin-TCF complex assembly [GO:1904837]; canonical Wnt signaling pathway [GO:0060070]; myotube differentiation involved in skeletal muscle regeneration [GO:0014908]; positive regulation of transcription by RNA p…	beta-catenin binding [GO:0008013]; transcription coactivator activity [GO:0003713]	GO:0003713; GO:0005654; GO:0005801; GO:0008013; GO:0014908; GO:0035019; GO:0035914; GO:0045944; GO:0060070; GO:1904837; GO:1990907		SUBCELLULAR LOCATION: Nucleus {ECO:0000250}.				B-cell CLL/lymphoma 9 protein OS=Homo sapiens OX=9606 GN=BCL9 PE=1 SV=4 - [BCL9_HUMAN]	1.61	1	1	1	1	4.754e+08	0	0	2.87897	1.61	1	1		0				0			1426	149.194	8.90967
O00541	PESC	Pescadillo homolog	FUNCTION: Component of the PeBoW complex, which is required for maturation of 28S and 5.8S ribosomal RNAs and formation of the 60S ribosome. {ECO:0000255|HAMAP-Rule:MF_03028, ECO:0000269|PubMed:16738141, ECO:0000269|PubMed:17189298, ECO:0000269|PubMed:17353269}.	cell population proliferation [GO:0008283]; maturation of 5.8S rRNA from tricistronic rRNA transcript (SSU-rRNA, 5.8S rRNA, LSU-rRNA) [GO:0000466]; maturation of LSU-rRNA from tricistronic rRNA transcript (SSU-rRNA, 5.8S rRNA, LSU-rRNA) [GO:0000463]; nucleolus organization [GO:0007000]; protein localization to organelle [GO:0033365]; regulation of cell cycle [GO:0051726]; ribosomal large subunit …	condensed chromosome [GO:0000793]; cytosol [GO:0005829]; membrane [GO:0016020]; nucleolus [GO:0005730]; nucleoplasm [GO:0005654]; PeBoW complex [GO:0070545]; preribosome, large subunit precursor [GO:0030687]	condensed chromosome [GO:0000793]; cytosol [GO:0005829]; membrane [GO:0016020]; nucleolus [GO:0005730]; nucleoplasm [GO:0005654]; PeBoW complex [GO:0070545]; preribosome, large subunit precursor [GO:0030687]; ribonucleoprotein complex binding [GO:0043021]; RNA binding [GO:0003723]; cell population proliferation [GO:0008283]; maturation of 5.8S rRNA from tricistronic rRNA transcript (SSU-rRNA, 5.8…	ribonucleoprotein complex binding [GO:0043021]; RNA binding [GO:0003723]	GO:0000463; GO:0000466; GO:0000793; GO:0003723; GO:0005654; GO:0005730; GO:0005829; GO:0006364; GO:0007000; GO:0008283; GO:0016020; GO:0030687; GO:0033365; GO:0042273; GO:0043021; GO:0051726; GO:0070545		SUBCELLULAR LOCATION: Nucleus, nucleolus. Nucleus, nucleoplasm. Chromosome. Note=Appears to localize to the periphery of metaphase chromosomes during mitosis and to the prenucleolar bodies that form in mitotic cells prior to the actual nucleoli. {ECO:0000255|HAMAP-Rule:MF_03028}.				Pescadillo homolog OS=Homo sapiens OX=9606 GN=PES1 PE=1 SV=1 - [PESC_HUMAN]	11.56	1	4	4	7	1.95453e+07	5.0974e+07	2.17064e+07	7.39199	8.5	3	3	7.056	7.14	2	2	6.41714	8.16	2	2	588	67.96	7.32764
O00566	MPP10	U3 small nucleolar ribonucleoprotein protein MPP10 (M phase phosphoprotein 10)	FUNCTION: Component of the 60-80S U3 small nucleolar ribonucleoprotein (U3 snoRNP). Required for the early cleavages during pre-18S ribosomal RNA processing.	negative regulation of phosphatase activity [GO:0010923]; RNA processing [GO:0006396]; RNA splicing [GO:0008380]; RNA splicing, via transesterification reactions [GO:0000375]; rRNA processing [GO:0006364]	chromosome [GO:0005694]; Mpp10 complex [GO:0034457]; nucleolus [GO:0005730]; nucleoplasm [GO:0005654]; small nucleolar ribonucleoprotein complex [GO:0005732]; small-subunit processome [GO:0032040]	chromosome [GO:0005694]; Mpp10 complex [GO:0034457]; nucleolus [GO:0005730]; nucleoplasm [GO:0005654]; small nucleolar ribonucleoprotein complex [GO:0005732]; small-subunit processome [GO:0032040]; RNA binding [GO:0003723]; negative regulation of phosphatase activity [GO:0010923]; RNA processing [GO:0006396]; RNA splicing [GO:0008380]; RNA splicing, via transesterification reactions [GO:0000375];…	RNA binding [GO:0003723]	GO:0000375; GO:0003723; GO:0005654; GO:0005694; GO:0005730; GO:0005732; GO:0006364; GO:0006396; GO:0008380; GO:0010923; GO:0032040; GO:0034457		SUBCELLULAR LOCATION: Nucleus, nucleolus {ECO:0000269|PubMed:12429849, ECO:0000269|PubMed:12655004, ECO:0000269|PubMed:9450966}. Chromosome {ECO:0000269|PubMed:9450966}. Note=Fibrillar region of the nucleolus (PubMed:9450966). After dissolution of the nucleolus in early M phase becomes associated with chromosomes through metaphase and anaphase (PubMed:9450966). In telophase localized to small cel…				U3 small nucleolar ribonucleoprotein protein MPP10 OS=Homo sapiens OX=9606 GN=MPHOSPH10 PE=1 SV=2 - [MPP10_HUMAN]	4.41	1	1	1	5	4.29848e+07	33805340	2.23305e+07	6.9877	4.41	1	2	3.38585	4.41	1	1	7.91304	4.41	1	2	681	78.8157	4.85596
O00567	NOP56	Nucleolar protein 56 (Nucleolar protein 5A)	FUNCTION: Involved in the early to middle stages of 60S ribosomal subunit biogenesis. Core component of box C/D small nucleolar ribonucleoprotein (snoRNP) particles. Required for the biogenesis of box C/D snoRNAs such U3, U8 and U14 snoRNAs. {ECO:0000269|PubMed:12777385, ECO:0000269|PubMed:15574333}.	rRNA processing [GO:0006364]	box C/D snoRNP complex [GO:0031428]; cytoplasm [GO:0005737]; fibrillar center [GO:0001650]; membrane [GO:0016020]; nucleolus [GO:0005730]; nucleoplasm [GO:0005654]; pre-snoRNP complex [GO:0070761]; small nucleolar ribonucleoprotein complex [GO:0005732]; small-subunit processome [GO:0032040]	box C/D snoRNP complex [GO:0031428]; cytoplasm [GO:0005737]; fibrillar center [GO:0001650]; membrane [GO:0016020]; nucleolus [GO:0005730]; nucleoplasm [GO:0005654]; pre-snoRNP complex [GO:0070761]; small nucleolar ribonucleoprotein complex [GO:0005732]; small-subunit processome [GO:0032040]; cadherin binding [GO:0045296]; histone methyltransferase binding [GO:1990226]; RNA binding [GO:0003723]; s…	cadherin binding [GO:0045296]; histone methyltransferase binding [GO:1990226]; RNA binding [GO:0003723]; snoRNA binding [GO:0030515]	GO:0001650; GO:0003723; GO:0005654; GO:0005730; GO:0005732; GO:0005737; GO:0006364; GO:0016020; GO:0030515; GO:0031428; GO:0032040; GO:0045296; GO:0070761; GO:1990226		SUBCELLULAR LOCATION: Nucleus, nucleolus {ECO:0000269|PubMed:12429849, ECO:0000269|PubMed:12777385, ECO:0000269|PubMed:9372940}. Cytoplasm {ECO:0000250|UniProtKB:Q9D6Z1}. Nucleus, nucleoplasm {ECO:0000305|PubMed:15574333}.				Nucleolar protein 56 OS=Homo sapiens OX=9606 GN=NOP56 PE=1 SV=4 - [NOP56_HUMAN]	37.37	1	14	14	55	1.29214e+08	1.08097e+08	6.40669e+07	73.0695	33.16	12	22	55.2089	25.42	9	17	54.3883	22.73	8	16	594	66.0087	9.18799
O00571	DDX3X	ATP-dependent RNA helicase DDX3X (EC 3.6.4.13) (CAP-Rf) (DEAD box protein 3, X-chromosomal) (DEAD box, X isoform) (DBX) (Helicase-like protein 2) (HLP2)	FUNCTION: Multifunctional ATP-dependent RNA helicase (PubMed:17357160, PubMed:21589879). The ATPase activity can be stimulated by various ribo-and deoxynucleic acids indicative for a relaxed substrate specificity (PubMed:29222110). In vitro can unwind partially double-stranded DNA with a preference for 5'-single-stranded DNA overhangs (PubMed:17357160, PubMed:21589879). Binds RNA G-quadruplex (rG…	cell differentiation [GO:0030154]; cellular response to arsenic-containing substance [GO:0071243]; cellular response to osmotic stress [GO:0071470]; chromosome segregation [GO:0007059]; extrinsic apoptotic signaling pathway via death domain receptors [GO:0008625]; gamete generation [GO:0007276]; innate immune response [GO:0045087]; intracellular signal transduction [GO:0035556]; intrinsic apoptot…	cell leading edge [GO:0031252]; centrosome [GO:0005813]; cytoplasm [GO:0005737]; cytoplasmic stress granule [GO:0010494]; cytosol [GO:0005829]; extracellular exosome [GO:0070062]; extracellular region [GO:0005576]; ficolin-1-rich granule lumen [GO:1904813]; lamellipodium [GO:0030027]; NLRP3 inflammasome complex [GO:0072559]; nucleoplasm [GO:0005654]; nucleus [GO:0005634]; P granule [GO:0043186]; …	cell leading edge [GO:0031252]; centrosome [GO:0005813]; cytoplasm [GO:0005737]; cytoplasmic stress granule [GO:0010494]; cytosol [GO:0005829]; extracellular exosome [GO:0070062]; extracellular region [GO:0005576]; ficolin-1-rich granule lumen [GO:1904813]; lamellipodium [GO:0030027]; NLRP3 inflammasome complex [GO:0072559]; nucleoplasm [GO:0005654]; nucleus [GO:0005634]; P granule [GO:0043186]; …	ATPase activity [GO:0016887]; ATP binding [GO:0005524]; cadherin binding [GO:0045296]; CTPase activity [GO:0043273]; DNA binding [GO:0003677]; DNA helicase activity [GO:0003678]; eukaryotic initiation factor 4E binding [GO:0008190]; gamma-tubulin binding [GO:0043015]; GTPase activity [GO:0003924]; mRNA 5'-UTR binding [GO:0048027]; mRNA binding [GO:0003729]; nucleoside-triphosphatase activity [GO:…	GO:0003677; GO:0003678; GO:0003723; GO:0003724; GO:0003729; GO:0003924; GO:0005524; GO:0005576; GO:0005634; GO:0005654; GO:0005737; GO:0005813; GO:0005829; GO:0005886; GO:0006413; GO:0007059; GO:0007276; GO:0008134; GO:0008143; GO:0008190; GO:0008625; GO:0009615; GO:0010494; GO:0010501; GO:0010628; GO:0016032; GO:0016055; GO:0016887; GO:0017111; GO:0017148; GO:0030027; GO:0030154; GO:0030307; GO:…		SUBCELLULAR LOCATION: Cell membrane {ECO:0000269|PubMed:23413191, ECO:0000269|PubMed:29899501}. Nucleus {ECO:0000269|PubMed:10329544, ECO:0000269|PubMed:15507209, ECO:0000269|PubMed:16818630, ECO:0000269|PubMed:18596238, ECO:0000269|PubMed:18636090, ECO:0000269|PubMed:22034099, ECO:0000269|PubMed:29899501}. Cytoplasm {ECO:0000269|PubMed:10329544, ECO:0000269|PubMed:15507209, ECO:0000269|PubMed:16…				ATP-dependent RNA helicase DDX3X OS=Homo sapiens OX=9606 GN=DDX3X PE=1 SV=3 - [DDX3X_HUMAN]	36.86	2	4	20	80	3.94354e+08	3.64046e+08	2.47867e+08	81.8939	29.61	16	28	76.898	32.93	18	27	62.8903	28.4	15	25	662	73.198	7.18115
O00584	RNT2	Ribonuclease T2 (EC 4.6.1.19) (Ribonuclease 6)	FUNCTION: Ribonuclease that plays an essential role in innate immune response by recognizing and degrading RNAs from microbial pathogens that are subsequently sensed by TLR8 (PubMed:31778653). Cleaves preferentially single-stranded RNA molecules between purine and uridine residues, which critically contributes to the supply of catabolic uridine and the generation of purine-2',3'-cyclophosphate-te…	neutrophil degranulation [GO:0043312]; RNA catabolic process [GO:0006401]	azurophil granule lumen [GO:0035578]; endoplasmic reticulum lumen [GO:0005788]; extracellular exosome [GO:0070062]; extracellular region [GO:0005576]; extracellular space [GO:0005615]; lysosomal lumen [GO:0043202]; lysosome [GO:0005764]	azurophil granule lumen [GO:0035578]; endoplasmic reticulum lumen [GO:0005788]; extracellular exosome [GO:0070062]; extracellular region [GO:0005576]; extracellular space [GO:0005615]; lysosomal lumen [GO:0043202]; lysosome [GO:0005764]; endoribonuclease activity [GO:0004521]; lyase activity [GO:0016829]; ribonuclease activity [GO:0004540]; ribonuclease T2 activity [GO:0033897]; RNA binding [GO:0…	endoribonuclease activity [GO:0004521]; lyase activity [GO:0016829]; ribonuclease activity [GO:0004540]; ribonuclease T2 activity [GO:0033897]; RNA binding [GO:0003723]	GO:0003723; GO:0004521; GO:0004540; GO:0005576; GO:0005615; GO:0005764; GO:0005788; GO:0006401; GO:0016829; GO:0033897; GO:0035578; GO:0043202; GO:0043312; GO:0070062		SUBCELLULAR LOCATION: Secreted {ECO:0000269|PubMed:15809705, ECO:0000269|PubMed:16620762}. Lysosome lumen {ECO:0000269|PubMed:16620762}. Endoplasmic reticulum lumen {ECO:0000269|PubMed:16620762}. Mitochondrion intermembrane space {ECO:0000269|PubMed:28730546, ECO:0000269|PubMed:30184494, ECO:0000269|PubMed:30385512}. Note=Full-length RNASET2 is found in the endoplasmic reticulum while smaller RNA…				Ribonuclease T2 OS=Homo sapiens OX=9606 GN=RNASET2 PE=1 SV=2 - [RNT2_HUMAN]	46.09	1	10	10	41	1.80892e+08	1.4118e+08	1.76064e+08	48.543	37.89	9	16	37.0201	32.42	8	12	40.9206	46.09	10	13	256	29.4618	7.07861
O00625	PIR	Pirin (EC 1.13.11.24) (Probable quercetin 2,3-dioxygenase PIR) (Probable quercetinase)	FUNCTION: Transcriptional coregulator of NF-kappa-B which facilitates binding of NF-kappa-B proteins to target kappa-B genes in a redox-state-dependent manner. May be required for efficient terminal myeloid maturation of hematopoietic cells. Has quercetin 2,3-dioxygenase activity (in vitro). {ECO:0000269|PubMed:17288615, ECO:0000269|PubMed:20010624, ECO:0000269|PubMed:20711196, ECO:0000269|PubMed…	digestion [GO:0007586]; monocyte differentiation [GO:0030224]; transcription by RNA polymerase II [GO:0006366]	cytoplasm [GO:0005737]; cytosol [GO:0005829]; nucleoplasm [GO:0005654]; nucleus [GO:0005634]	cytoplasm [GO:0005737]; cytosol [GO:0005829]; nucleoplasm [GO:0005654]; nucleus [GO:0005634]; metal ion binding [GO:0046872]; quercetin 2,3-dioxygenase activity [GO:0008127]; transcription coregulator activity [GO:0003712]; digestion [GO:0007586]; monocyte differentiation [GO:0030224]; transcription by RNA polymerase II [GO:0006366]	metal ion binding [GO:0046872]; quercetin 2,3-dioxygenase activity [GO:0008127]; transcription coregulator activity [GO:0003712]	GO:0003712; GO:0005634; GO:0005654; GO:0005737; GO:0005829; GO:0006366; GO:0007586; GO:0008127; GO:0030224; GO:0046872		SUBCELLULAR LOCATION: Nucleus {ECO:0000269|PubMed:20089166, ECO:0000269|PubMed:9079676}. Cytoplasm {ECO:0000269|PubMed:20089166}. Note=Predominantly localized in dot-like subnuclear structures. Cytoplasmic localization of PIR seems to positively correlate with melanoma progression. {ECO:0000269|PubMed:20089166, ECO:0000269|PubMed:9079676}.				Pirin OS=Homo sapiens OX=9606 GN=PIR PE=1 SV=1 - [PIR_HUMAN]	16.55	1	4	4	16	4.27034e+07	5.83252e+07	4.5672e+07	12.0643	12.07	3	5	11.9495	16.55	4	6	10.0904	16.55	4	5	290	32.0933	6.91748
O00629	IMA3	Importin subunit alpha-3 (Importin alpha Q1) (Qip1) (Karyopherin subunit alpha-4)	FUNCTION: Functions in nuclear protein import as an adapter protein for nuclear receptor KPNB1. Binds specifically and directly to substrates containing either a simple or bipartite NLS motif. Docking of the importin/substrate complex to the nuclear pore complex (NPC) is mediated by KPNB1 through binding to nucleoporin FxFG repeats and the complex is subsequently translocated through the pore by …	modulation by virus of host cellular process [GO:0019054]; NLS-bearing protein import into nucleus [GO:0006607]; response to hydrogen peroxide [GO:0042542]	cytosol [GO:0005829]; nuclear membrane [GO:0031965]; nuclear pore [GO:0005643]; nucleoplasm [GO:0005654]	cytosol [GO:0005829]; nuclear membrane [GO:0031965]; nuclear pore [GO:0005643]; nucleoplasm [GO:0005654]; nuclear import signal receptor activity [GO:0061608]; nuclear localization sequence binding [GO:0008139]; modulation by virus of host cellular process [GO:0019054]; NLS-bearing protein import into nucleus [GO:0006607]; response to hydrogen peroxide [GO:0042542]	nuclear import signal receptor activity [GO:0061608]; nuclear localization sequence binding [GO:0008139]	GO:0005643; GO:0005654; GO:0005829; GO:0006607; GO:0008139; GO:0019054; GO:0031965; GO:0042542; GO:0061608		SUBCELLULAR LOCATION: Cytoplasm {ECO:0000250}. Nucleus {ECO:0000250}.				Importin subunit alpha-3 OS=Homo sapiens OX=9606 GN=KPNA4 PE=1 SV=1 - [IMA3_HUMAN]	26.3	1	5	7	25	5.78208e+07	52429357	5.03575e+07	22.3306	16.89	5	8	34.3578	26.3	7	10	18.7627	23.61	6	7	521	57.8506	4.95752
O00743	PPP6	Serine/threonine-protein phosphatase 6 catalytic subunit (PP6C) (EC 3.1.3.16) [Cleaved into: Serine/threonine-protein phosphatase 6 catalytic subunit, N-terminally processed]	FUNCTION: Catalytic subunit of protein phosphatase 6 (PP6) (PubMed:17079228, PubMed:29053956). PP6 is a component of a signaling pathway regulating cell cycle progression in response to IL2 receptor stimulation (PubMed:10227379). N-terminal domain restricts G1 to S phase progression in cancer cells, in part through control of cyclin D1 (PubMed:17568194). During mitosis, regulates spindle position…	COPII vesicle coating [GO:0048208]; G1/S transition of mitotic cell cycle [GO:0000082]; innate immune response [GO:0045087]; protein dephosphorylation [GO:0006470]	cytosol [GO:0005829]; Golgi membrane [GO:0000139]; mitochondrion [GO:0005739]	cytosol [GO:0005829]; Golgi membrane [GO:0000139]; mitochondrion [GO:0005739]; metal ion binding [GO:0046872]; protein serine/threonine phosphatase activity [GO:0004722]; COPII vesicle coating [GO:0048208]; G1/S transition of mitotic cell cycle [GO:0000082]; innate immune response [GO:0045087]; protein dephosphorylation [GO:0006470]	metal ion binding [GO:0046872]; protein serine/threonine phosphatase activity [GO:0004722]	GO:0000082; GO:0000139; GO:0004722; GO:0005739; GO:0005829; GO:0006470; GO:0045087; GO:0046872; GO:0048208		SUBCELLULAR LOCATION: Mitochondrion {ECO:0000269|PubMed:29053956}. Cytoplasm {ECO:0000269|PubMed:16769727, ECO:0000269|PubMed:17568194}.				Serine/threonine-protein phosphatase 6 catalytic subunit OS=Homo sapiens OX=9606 GN=PPP6C PE=1 SV=1 - [PPP6_HUMAN]	16.07	1	4	4	9	2.45102e+07	5.26191e+07	3.94526e+07	5.41678	12.13	3	3	8.08419	10.16	2	3	8.34136	14.1	3	3	305	35.1215	5.69385
O00754	MA2B1	Lysosomal alpha-mannosidase (Laman) (EC 3.2.1.24) (Lysosomal acid alpha-mannosidase) (Mannosidase alpha class 2B member 1) (Mannosidase alpha-B) [Cleaved into: Lysosomal alpha-mannosidase A peptide; Lysosomal alpha-mannosidase B peptide; Lysosomal alpha-mannosidase C peptide; Lysosomal alpha-mannosidase D peptide; Lysosomal alpha-mannosidase E peptide]	FUNCTION: Necessary for the catabolism of N-linked carbohydrates released during glycoprotein turnover. Cleaves all known types of alpha-mannosidic linkages.	cellular protein modification process [GO:0006464]; learning or memory [GO:0007611]; mannose metabolic process [GO:0006013]; neutrophil degranulation [GO:0043312]; oligosaccharide catabolic process [GO:0009313]; protein deglycosylation [GO:0006517]	azurophil granule lumen [GO:0035578]; extracellular exosome [GO:0070062]; extracellular region [GO:0005576]; extracellular space [GO:0005615]; lysosomal lumen [GO:0043202]; vacuolar membrane [GO:0005774]	azurophil granule lumen [GO:0035578]; extracellular exosome [GO:0070062]; extracellular region [GO:0005576]; extracellular space [GO:0005615]; lysosomal lumen [GO:0043202]; vacuolar membrane [GO:0005774]; alpha-mannosidase activity [GO:0004559]; mannose binding [GO:0005537]; metal ion binding [GO:0046872]; cellular protein modification process [GO:0006464]; learning or memory [GO:0007611]; mannos…	alpha-mannosidase activity [GO:0004559]; mannose binding [GO:0005537]; metal ion binding [GO:0046872]	GO:0004559; GO:0005537; GO:0005576; GO:0005615; GO:0005774; GO:0006013; GO:0006464; GO:0006517; GO:0007611; GO:0009313; GO:0035578; GO:0043202; GO:0043312; GO:0046872; GO:0070062		SUBCELLULAR LOCATION: Lysosome.				Lysosomal alpha-mannosidase OS=Homo sapiens OX=9606 GN=MAN2B1 PE=1 SV=3 - [MA2B1_HUMAN]	20.57	1	14	14	62	1.14943e+08	1.63353e+08	9.98607e+07	58.7059	14.74	10	19	66.8249	16.82	11	21	57.9515	19.29	12	22	1011	113.672	7.28369
O00764	PDXK	Pyridoxal kinase (EC 2.7.1.35) (Pyridoxine kinase)	FUNCTION: Required for synthesis of pyridoxal-5-phosphate from vitamin B6. {ECO:0000269|PubMed:31187503}.	neutrophil degranulation [GO:0043312]; pyridoxal 5'-phosphate salvage [GO:0009443]; pyridoxal phosphate biosynthetic process [GO:0042823]; vitamin B6 metabolic process [GO:0042816]	cytosol [GO:0005829]; extracellular exosome [GO:0070062]; extracellular region [GO:0005576]; nucleoplasm [GO:0005654]; nucleus [GO:0005634]; secretory granule lumen [GO:0034774]; specific granule lumen [GO:0035580]	cytosol [GO:0005829]; extracellular exosome [GO:0070062]; extracellular region [GO:0005576]; nucleoplasm [GO:0005654]; nucleus [GO:0005634]; secretory granule lumen [GO:0034774]; specific granule lumen [GO:0035580]; ATP binding [GO:0005524]; lithium ion binding [GO:0031403]; magnesium ion binding [GO:0000287]; potassium ion binding [GO:0030955]; protein homodimerization activity [GO:0042803]; pyr…	ATP binding [GO:0005524]; lithium ion binding [GO:0031403]; magnesium ion binding [GO:0000287]; potassium ion binding [GO:0030955]; protein homodimerization activity [GO:0042803]; pyridoxal kinase activity [GO:0008478]; pyridoxal phosphate binding [GO:0030170]; sodium ion binding [GO:0031402]; zinc ion binding [GO:0008270]	GO:0000287; GO:0005524; GO:0005576; GO:0005634; GO:0005654; GO:0005829; GO:0008270; GO:0008478; GO:0009443; GO:0030170; GO:0030955; GO:0031402; GO:0031403; GO:0034774; GO:0035580; GO:0042803; GO:0042816; GO:0042823; GO:0043312; GO:0070062		SUBCELLULAR LOCATION: Cytoplasm.				Pyridoxal kinase OS=Homo sapiens OX=9606 GN=PDXK PE=1 SV=1 - [PDXK_HUMAN]	32.37	1	7	7	27	1.24844e+08	1.33546e+08	1.13121e+08	20.3857	25	4	7	29.5154	28.85	6	10	24.5345	32.37	7	10	312	35.0799	6.12549
O14529	CUX2	Homeobox protein cut-like 2 (Homeobox protein cux-2)	FUNCTION: Transcription factor involved in the control of neuronal proliferation and differentiation in the brain. Regulates dendrite development and branching, dendritic spine formation, and synaptogenesis in cortical layers II-III. Binds to DNA in a sequence-specific manner. {ECO:0000250|UniProtKB:P70298}.	cellular response to organic substance [GO:0071310]; cognition [GO:0050890]; Golgi vesicle transport [GO:0048193]; negative regulation of transcription by RNA polymerase II [GO:0000122]; positive regulation of dendrite morphogenesis [GO:0050775]; positive regulation of dendritic spine morphogenesis [GO:0061003]; positive regulation of excitatory postsynaptic potential [GO:2000463]; positive regul…	extracellular exosome [GO:0070062]; Golgi membrane [GO:0000139]; nuclear chromatin [GO:0000790]; nucleus [GO:0005634]	extracellular exosome [GO:0070062]; Golgi membrane [GO:0000139]; nuclear chromatin [GO:0000790]; nucleus [GO:0005634]; DNA-binding transcription factor activity, RNA polymerase II-specific [GO:0000981]; DNA-binding transcription repressor activity, RNA polymerase II-specific [GO:0001227]; RNA polymerase II cis-regulatory region sequence-specific DNA binding [GO:0000978]; RNA polymerase II regulat…	DNA-binding transcription factor activity, RNA polymerase II-specific [GO:0000981]; DNA-binding transcription repressor activity, RNA polymerase II-specific [GO:0001227]; RNA polymerase II cis-regulatory region sequence-specific DNA binding [GO:0000978]; RNA polymerase II regulatory region sequence-specific DNA binding [GO:0000977]; sequence-specific DNA binding [GO:0043565]	GO:0000122; GO:0000139; GO:0000790; GO:0000977; GO:0000978; GO:0000981; GO:0001227; GO:0005634; GO:0007614; GO:0010628; GO:0043565; GO:0048193; GO:0050775; GO:0050890; GO:0051965; GO:0061003; GO:0070062; GO:0071310; GO:2000463		SUBCELLULAR LOCATION: Nucleus {ECO:0000255|PROSITE-ProRule:PRU00108, ECO:0000255|PROSITE-ProRule:PRU00374}.				Homeobox protein cut-like 2 OS=Homo sapiens OX=9606 GN=CUX2 PE=1 SV=4 - [CUX2_HUMAN]	0.87	1	1	1	1	0	0	374395799		0				0			0	0.87	1	1	1486	161.577	5.47803
O14530	TXND9	Thioredoxin domain-containing protein 9 (ATP-binding protein associated with cell differentiation) (Protein 1-4)	FUNCTION: Significantly diminishes the chaperonin TCP1 complex ATPase activity, thus negatively impacts protein folding, including that of actin or tubulin. {ECO:0000269|PubMed:16415341}.	cell redox homeostasis [GO:0045454]	cell [GO:0005623]; centrosome [GO:0005813]; cytosol [GO:0005829]; midbody [GO:0030496]; nucleus [GO:0005634]	cell [GO:0005623]; centrosome [GO:0005813]; cytosol [GO:0005829]; midbody [GO:0030496]; nucleus [GO:0005634]; cadherin binding [GO:0045296]; cell redox homeostasis [GO:0045454]	cadherin binding [GO:0045296]	GO:0005623; GO:0005634; GO:0005813; GO:0005829; GO:0030496; GO:0045296; GO:0045454		SUBCELLULAR LOCATION: Cytoplasm {ECO:0000250|UniProtKB:Q9CQ79}. Nucleus {ECO:0000250|UniProtKB:Q9CQ79}. Cytoplasm, cytoskeleton, microtubule organizing center, centrosome {ECO:0000250|UniProtKB:Q9CQ79}. Midbody {ECO:0000250|UniProtKB:Q9CQ79}. Note=Co-localizes with beta-tubulin in the centrosome. {ECO:0000250|UniProtKB:Q9CQ79}.				Thioredoxin domain-containing protein 9 OS=Homo sapiens OX=9606 GN=TXNDC9 PE=1 SV=2 - [TXND9_HUMAN]	3.98	1	1	1	2	3.11287e+07	1.9772e+07	0	1.75857	3.98	1	1	1.75523	3.98	1	1		0			226	26.5175	5.88428
O14548	COX7R	Cytochrome c oxidase subunit 7A-related protein, mitochondrial (COX7a-related protein) (Cytochrome c oxidase subunit VIIa-related protein) (EB1)	FUNCTION: Involved in the regulation of oxidative phosphorylation and energy metabolism (By similarity). Necessary for the assembly of mitochondrial respiratory supercomplex (By similarity). {ECO:0000250|UniProtKB:Q61387}.	mitochondrial electron transport, cytochrome c to oxygen [GO:0006123]; mitochondrial respirasome assembly [GO:0097250]; regulation of oxidative phosphorylation [GO:0002082]	mitochondrial inner membrane [GO:0005743]; mitochondrial respirasome [GO:0005746]; mitochondrion [GO:0005739]; nucleolus [GO:0005730]	mitochondrial inner membrane [GO:0005743]; mitochondrial respirasome [GO:0005746]; mitochondrion [GO:0005739]; nucleolus [GO:0005730]; cytochrome-c oxidase activity [GO:0004129]; mitochondrial electron transport, cytochrome c to oxygen [GO:0006123]; mitochondrial respirasome assembly [GO:0097250]; regulation of oxidative phosphorylation [GO:0002082]	cytochrome-c oxidase activity [GO:0004129]	GO:0002082; GO:0004129; GO:0005730; GO:0005739; GO:0005743; GO:0005746; GO:0006123; GO:0097250		SUBCELLULAR LOCATION: Mitochondrion inner membrane {ECO:0000250}.				Cytochrome c oxidase subunit 7A-related protein, mitochondrial OS=Homo sapiens OX=9606 GN=COX7A2L PE=1 SV=2 - [COX7R_HUMAN]	28.95	1	1	1	1	0	0	0		0			4.14954	28.95	1	1		0			114	12.6065	9.42236
O14561	ACPM	Acyl carrier protein, mitochondrial (ACP) (CI-SDAP) (NADH-ubiquinone oxidoreductase 9.6 kDa subunit)	FUNCTION: Carrier of the growing fatty acid chain in fatty acid biosynthesis (By similarity). Accessory and non-catalytic subunit of the mitochondrial membrane respiratory chain NADH dehydrogenase (Complex I), which functions in the transfer of electrons from NADH to the respiratory chain (PubMed:27626371). {ECO:0000250|UniProtKB:P52505, ECO:0000269|PubMed:27626371}.	fatty acid biosynthetic process [GO:0006633]; mitochondrial electron transport, NADH to ubiquinone [GO:0006120]; mitochondrial respiratory chain complex I assembly [GO:0032981]; protein lipoylation [GO:0009249]	mitochondrial inner membrane [GO:0005743]; mitochondrial matrix [GO:0005759]; mitochondrial membrane [GO:0031966]; mitochondrial respiratory chain complex I [GO:0005747]; mitochondrion [GO:0005739]; nucleoplasm [GO:0005654]	mitochondrial inner membrane [GO:0005743]; mitochondrial matrix [GO:0005759]; mitochondrial membrane [GO:0031966]; mitochondrial respiratory chain complex I [GO:0005747]; mitochondrion [GO:0005739]; nucleoplasm [GO:0005654]; acyl binding [GO:0000035]; acyl carrier activity [GO:0000036]; calcium ion binding [GO:0005509]; fatty acid binding [GO:0005504]; NADH dehydrogenase (ubiquinone) activity [GO…	acyl binding [GO:0000035]; acyl carrier activity [GO:0000036]; calcium ion binding [GO:0005509]; fatty acid binding [GO:0005504]; NADH dehydrogenase (ubiquinone) activity [GO:0008137]	GO:0000035; GO:0000036; GO:0005504; GO:0005509; GO:0005654; GO:0005739; GO:0005743; GO:0005747; GO:0005759; GO:0006120; GO:0006633; GO:0008137; GO:0009249; GO:0031966; GO:0032981		SUBCELLULAR LOCATION: Mitochondrion {ECO:0000269|PubMed:12611891, ECO:0000269|PubMed:28892042}.				Acyl carrier protein, mitochondrial OS=Homo sapiens OX=9606 GN=NDUFAB1 PE=1 SV=3 - [ACPM_HUMAN]	21.15	1	4	4	16	1.91519e+08	2.89331e+08	1.69912e+08	12.1312	15.38	2	3	23.1126	15.38	3	8	17.6798	15.38	3	5	156	17.406	4.93213
O14562	UBFD1	Ubiquitin domain-containing protein UBFD1 (Ubiquitin-binding protein homolog)	FUNCTION: May play a role as NF-kappa-B regulator. {ECO:0000269|PubMed:19285159}.			cadherin binding [GO:0045296]; RNA binding [GO:0003723]	cadherin binding [GO:0045296]; RNA binding [GO:0003723]	GO:0003723; GO:0045296						Ubiquitin domain-containing protein UBFD1 OS=Homo sapiens OX=9606 GN=UBFD1 PE=1 SV=2 - [UBFD1_HUMAN]	15.53	1	4	4	6	2.57052e+07	2.71241e+07	0	6.96884	11.65	3	3	7.92035	13.27	3	3		0			309	33.3609	5.77002
O14579	COPE	Coatomer subunit epsilon (Epsilon-coat protein) (Epsilon-COP)	FUNCTION: The coatomer is a cytosolic protein complex that binds to dilysine motifs and reversibly associates with Golgi non-clathrin-coated vesicles, which further mediate biosynthetic protein transport from the ER, via the Golgi up to the trans Golgi network. The coatomer complex is required for budding from Golgi membranes, and is essential for the retrograde Golgi-to-ER transport of dilysine-…	endoplasmic reticulum to Golgi vesicle-mediated transport [GO:0006888]; intra-Golgi vesicle-mediated transport [GO:0006891]; protein transport [GO:0015031]; retrograde vesicle-mediated transport, Golgi to endoplasmic reticulum [GO:0006890]	COPI vesicle coat [GO:0030126]; cytosol [GO:0005829]; endoplasmic reticulum membrane [GO:0005789]; Golgi apparatus [GO:0005794]; Golgi membrane [GO:0000139]; nucleoplasm [GO:0005654]; transport vesicle [GO:0030133]	COPI vesicle coat [GO:0030126]; cytosol [GO:0005829]; endoplasmic reticulum membrane [GO:0005789]; Golgi apparatus [GO:0005794]; Golgi membrane [GO:0000139]; nucleoplasm [GO:0005654]; transport vesicle [GO:0030133]; structural molecule activity [GO:0005198]; endoplasmic reticulum to Golgi vesicle-mediated transport [GO:0006888]; intra-Golgi vesicle-mediated transport [GO:0006891]; protein transpo…	structural molecule activity [GO:0005198]	GO:0000139; GO:0005198; GO:0005654; GO:0005789; GO:0005794; GO:0005829; GO:0006888; GO:0006890; GO:0006891; GO:0015031; GO:0030126; GO:0030133		SUBCELLULAR LOCATION: Cytoplasm {ECO:0000250}. Golgi apparatus membrane {ECO:0000250}; Peripheral membrane protein {ECO:0000250}; Cytoplasmic side {ECO:0000250}. Cytoplasmic vesicle, COPI-coated vesicle membrane {ECO:0000250}; Peripheral membrane protein {ECO:0000250}; Cytoplasmic side {ECO:0000250}. Note=The coatomer is cytoplasmic or polymerized on the cytoplasmic side of the Golgi, as well as …				Coatomer subunit epsilon OS=Homo sapiens OX=9606 GN=COPE PE=1 SV=3 - [COPE_HUMAN]	55.84	1	10	10	61	1.31801e+08	1.87912e+08	1.48856e+08	57.7131	49.03	8	18	63.5278	49.35	9	21	76.9477	55.52	9	22	308	34.4603	5.12256
O14602	IF1AY	Eukaryotic translation initiation factor 1A, Y-chromosomal (eIF-1A Y isoform) (Eukaryotic translation initiation factor 4C) (eIF-4C)	FUNCTION: Seems to be required for maximal rate of protein biosynthesis. Enhances ribosome dissociation into subunits and stabilizes the binding of the initiator Met-tRNA(I) to 40 S ribosomal subunits (By similarity). {ECO:0000250}.			translation initiation factor activity [GO:0003743]	translation initiation factor activity [GO:0003743]	GO:0003743						Eukaryotic translation initiation factor 1A, Y-chromosomal OS=Homo sapiens OX=9606 GN=EIF1AY PE=1 SV=4 - [IF1AY_HUMAN]	38.89	2	4	4	7	2.96559e+07	1.5512e+07	8.69379e+07	1.92516	27.78	2	2	2.08818	6.94	1	1	5.65906	18.06	3	4	144	16.4323	5.23682
O14617	AP3D1	AP-3 complex subunit delta-1 (AP-3 complex subunit delta) (Adaptor-related protein complex 3 subunit delta-1) (Delta-adaptin)	FUNCTION: Part of the AP-3 complex, an adaptor-related complex which is not clathrin-associated. The complex is associated with the Golgi region as well as more peripheral structures. It facilitates the budding of vesicles from the Golgi membrane and may be directly involved in trafficking to lysosomes. Involved in process of CD8+ T-cell and NK cell degranulation (PubMed:26744459). In concert wit…	anterograde axonal transport [GO:0008089]; anterograde synaptic vesicle transport [GO:0048490]; antigen processing and presentation, exogenous lipid antigen via MHC class Ib [GO:0048007]; endosome to melanosome transport [GO:0035646]; Golgi to vacuole transport [GO:0006896]; intracellular protein transport [GO:0006886]; melanosome organization [GO:0032438]; neurotransmitter receptor transport, po…	AP-3 adaptor complex [GO:0030123]; axon cytoplasm [GO:1904115]; cell [GO:0005623]; endosome membrane [GO:0010008]; glutamatergic synapse [GO:0098978]; Golgi apparatus [GO:0005794]; Golgi membrane [GO:0000139]; lysosomal membrane [GO:0005765]; membrane [GO:0016020]; postsynapse [GO:0098794]; presynaptic endosome [GO:0098830]; terminal bouton [GO:0043195]	AP-3 adaptor complex [GO:0030123]; axon cytoplasm [GO:1904115]; cell [GO:0005623]; endosome membrane [GO:0010008]; glutamatergic synapse [GO:0098978]; Golgi apparatus [GO:0005794]; Golgi membrane [GO:0000139]; lysosomal membrane [GO:0005765]; membrane [GO:0016020]; postsynapse [GO:0098794]; presynaptic endosome [GO:0098830]; terminal bouton [GO:0043195]; anterograde axonal transport [GO:0008089];…		GO:0000139; GO:0005623; GO:0005765; GO:0005794; GO:0006623; GO:0006886; GO:0006896; GO:0008089; GO:0010008; GO:0016020; GO:0016182; GO:0030123; GO:0032438; GO:0035646; GO:0043195; GO:0048007; GO:0048490; GO:0048499; GO:0051138; GO:0061088; GO:0072657; GO:0098794; GO:0098830; GO:0098943; GO:0098978; GO:1904115		SUBCELLULAR LOCATION: Cytoplasm {ECO:0000250}. Golgi apparatus membrane {ECO:0000250}; Peripheral membrane protein {ECO:0000250}; Cytoplasmic side {ECO:0000250}.				AP-3 complex subunit delta-1 OS=Homo sapiens OX=9606 GN=AP3D1 PE=1 SV=1 - [AP3D1_HUMAN]	15.7	1	11	11	31	1.25074e+08	7.4756e+07	3.82669e+07	22.0511	9.11	7	10	28.3712	7.37	4	11	29.6701	10.49	6	10	1153	130.076	8.48486
O14653	GOSR2	Golgi SNAP receptor complex member 2 (27 kDa Golgi SNARE protein) (Membrin)	FUNCTION: Involved in transport of proteins from the cis/medial-Golgi to the trans-Golgi network. {ECO:0000269|PubMed:9349823}.	COPII vesicle coating [GO:0048208]; endoplasmic reticulum to Golgi vesicle-mediated transport [GO:0006888]; Golgi to vacuole transport [GO:0006896]; intra-Golgi vesicle-mediated transport [GO:0006891]; IRE1-mediated unfolded protein response [GO:0036498]; protein targeting to vacuole [GO:0006623]; retrograde transport, endosome to Golgi [GO:0042147]; vesicle fusion with Golgi apparatus [GO:004828…	cytosol [GO:0005829]; endoplasmic reticulum-Golgi intermediate compartment membrane [GO:0033116]; endoplasmic reticulum membrane [GO:0005789]; ER to Golgi transport vesicle membrane [GO:0012507]; Golgi apparatus [GO:0005794]; Golgi membrane [GO:0000139]; integral component of membrane [GO:0016021]; late endosome membrane [GO:0031902]; membrane [GO:0016020]; SNARE complex [GO:0031201]	cytosol [GO:0005829]; endoplasmic reticulum membrane [GO:0005789]; endoplasmic reticulum-Golgi intermediate compartment membrane [GO:0033116]; ER to Golgi transport vesicle membrane [GO:0012507]; Golgi apparatus [GO:0005794]; Golgi membrane [GO:0000139]; integral component of membrane [GO:0016021]; late endosome membrane [GO:0031902]; membrane [GO:0016020]; SNARE complex [GO:0031201]; SNAP recept…	SNAP receptor activity [GO:0005484]; SNARE binding [GO:0000149]	GO:0000139; GO:0000149; GO:0005484; GO:0005789; GO:0005794; GO:0005829; GO:0006623; GO:0006888; GO:0006891; GO:0006896; GO:0012507; GO:0016020; GO:0016021; GO:0031201; GO:0031902; GO:0033116; GO:0036498; GO:0042147; GO:0048208; GO:0048280		SUBCELLULAR LOCATION: Golgi apparatus, cis-Golgi network membrane {ECO:0000269|PubMed:21549339}; Single-pass type IV membrane protein {ECO:0000255}. Golgi apparatus membrane {ECO:0000269|PubMed:9349823}. Endoplasmic reticulum membrane {ECO:0000250|UniProtKB:O35165}. Note=Concentrated most in the intermediate compartment/cis-Golgi network and the cis-Golgi cisternae 1 and 2. Greatly reduced in con…	TRANSMEM 191..211; /note="Helical; Anchor for type IV membrane protein"; /evidence="ECO:0000255"			Golgi SNAP receptor complex member 2 OS=Homo sapiens OX=9606 GN=GOSR2 PE=1 SV=2 - [GOSR2_HUMAN]	7.55	1	1	1	6	0	1.82341e+07	9.45874e+06	2.81545	7.55	1	1	2.63192	7.55	1	2	2.68567	7.55	1	3	212	24.7598	8.06006
O14657	TOR1B	Torsin-1B (Torsin ATPase-1B) (EC 3.6.4.-) (Torsin family 1 member B)	FUNCTION: May serve as a molecular chaperone assisting in the proper folding of secreted and/or membrane proteins. Plays a role in non-neural cells nuclear envelope and endoplasmic reticulum integrity. May have a redundant function with TOR1A in non-neural tissues. {ECO:0000269|PubMed:23569223, ECO:0000269|PubMed:24275647}.	chaperone cofactor-dependent protein refolding [GO:0051085]; endoplasmic reticulum organization [GO:0007029]; nuclear membrane organization [GO:0071763]; protein localization to nucleus [GO:0034504]; response to unfolded protein [GO:0006986]	endoplasmic reticulum [GO:0005783]; endoplasmic reticulum lumen [GO:0005788]; extracellular exosome [GO:0070062]; nuclear envelope [GO:0005635]; nuclear membrane [GO:0031965]	endoplasmic reticulum [GO:0005783]; endoplasmic reticulum lumen [GO:0005788]; extracellular exosome [GO:0070062]; nuclear envelope [GO:0005635]; nuclear membrane [GO:0031965]; ATP binding [GO:0005524]; ATPase activity [GO:0016887]; identical protein binding [GO:0042802]; kinesin binding [GO:0019894]; chaperone cofactor-dependent protein refolding [GO:0051085]; endoplasmic reticulum organization […	ATPase activity [GO:0016887]; ATP binding [GO:0005524]; identical protein binding [GO:0042802]; kinesin binding [GO:0019894]	GO:0005524; GO:0005635; GO:0005783; GO:0005788; GO:0006986; GO:0007029; GO:0016887; GO:0019894; GO:0031965; GO:0034504; GO:0042802; GO:0051085; GO:0070062; GO:0071763		SUBCELLULAR LOCATION: Endoplasmic reticulum lumen {ECO:0000269|PubMed:15147511}. Nucleus membrane {ECO:0000269|PubMed:15147511}.				Torsin-1B OS=Homo sapiens OX=9606 GN=TOR1B PE=1 SV=2 - [TOR1B_HUMAN]	8.33	1	2	2	3	0	1.17893e+07	1.85032e+07		0			4.25439	8.33	2	2	0	4.17	1	1	336	37.9548	8.54346
O14672	ADA10	Disintegrin and metalloproteinase domain-containing protein 10 (ADAM 10) (EC 3.4.24.81) (CDw156) (Kuzbanian protein homolog) (Mammalian disintegrin-metalloprotease) (CD antigen CD156c)	FUNCTION: Cleaves the membrane-bound precursor of TNF-alpha at '76-Ala-|-Val-77' to its mature soluble form. Responsible for the proteolytical release of soluble JAM3 from endothelial cells surface (PubMed:20592283). Responsible for the proteolytic release of several other cell-surface proteins, including heparin-binding epidermal growth-like factor, ephrin-A2, CD44, CDH2 and for constitutive and…	adherens junction organization [GO:0034332]; amyloid-beta formation [GO:0034205]; amyloid precursor protein catabolic process [GO:0042987]; cell-cell signaling [GO:0007267]; cellular protein metabolic process [GO:0044267]; cochlea development [GO:0090102]; constitutive protein ectodomain proteolysis [GO:0051089]; extracellular matrix disassembly [GO:0022617]; integrin-mediated signaling pathway […	adherens junction [GO:0005912]; axon [GO:0030424]; cell surface [GO:0009986]; clathrin-coated vesicle [GO:0030136]; cytoplasm [GO:0005737]; dendritic spine [GO:0043197]; endoplasmic reticulum lumen [GO:0005788]; extracellular exosome [GO:0070062]; focal adhesion [GO:0005925]; glutamatergic synapse [GO:0098978]; Golgi apparatus [GO:0005794]; Golgi-associated vesicle [GO:0005798]; Golgi membrane [G…	adherens junction [GO:0005912]; axon [GO:0030424]; cell surface [GO:0009986]; clathrin-coated vesicle [GO:0030136]; cytoplasm [GO:0005737]; dendritic spine [GO:0043197]; endoplasmic reticulum lumen [GO:0005788]; extracellular exosome [GO:0070062]; focal adhesion [GO:0005925]; glutamatergic synapse [GO:0098978]; Golgi apparatus [GO:0005794]; Golgi membrane [GO:0000139]; Golgi-associated vesicle [G…	endopeptidase activity [GO:0004175]; integrin binding [GO:0005178]; metal ion binding [GO:0046872]; metalloendopeptidase activity [GO:0004222]; metalloendopeptidase activity involved in amyloid precursor protein catabolic process [GO:1902945]; metallopeptidase activity [GO:0008237]; protein homodimerization activity [GO:0042803]; protein kinase binding [GO:0019901]; SH3 domain binding [GO:0017124…	GO:0000139; GO:0001701; GO:0004175; GO:0004222; GO:0005102; GO:0005178; GO:0005634; GO:0005737; GO:0005788; GO:0005794; GO:0005798; GO:0005802; GO:0005886; GO:0005912; GO:0005925; GO:0006468; GO:0006509; GO:0007162; GO:0007219; GO:0007229; GO:0007267; GO:0007283; GO:0008021; GO:0008237; GO:0008284; GO:0008593; GO:0009986; GO:0010820; GO:0014069; GO:0016020; GO:0016021; GO:0016485; GO:0017124; GO:…		SUBCELLULAR LOCATION: Cell membrane {ECO:0000269|PubMed:20624979, ECO:0000269|PubMed:23676497, ECO:0000269|PubMed:24990881, ECO:0000269|PubMed:26686862, ECO:0000269|PubMed:29430990, ECO:0000269|PubMed:30463011}; Single-pass type I membrane protein {ECO:0000305}. Golgi apparatus membrane {ECO:0000269|PubMed:12475894}; Single-pass type I membrane protein {ECO:0000305}. Cytoplasmic vesicle, clathrin…	TRANSMEM 673..693; /note="Helical"; /evidence="ECO:0000255"			Disintegrin and metalloproteinase domain-containing protein 10 OS=Homo sapiens OX=9606 GN=ADAM10 PE=1 SV=1 - [ADA10_HUMAN]	2.01	1	1	1	1	0	4.34123e+06	0		0			2.26755	2.01	1	1		0			748	84.0877	7.76709
O14681	EI24	Etoposide-induced protein 2.4 homolog (p53-induced gene 8 protein)	FUNCTION: Acts as a negative growth regulator via p53-mediated apoptosis pathway. Regulates formation of degradative autolysosomes during autophagy (By similarity). {ECO:0000250}.	apoptotic process [GO:0006915]; macroautophagy [GO:0016236]; negative regulation of cell growth [GO:0030308]	cytosol [GO:0005829]; endoplasmic reticulum [GO:0005783]; endoplasmic reticulum membrane [GO:0005789]; Golgi apparatus [GO:0005794]; integral component of membrane [GO:0016021]; membrane [GO:0016020]; nuclear membrane [GO:0031965]	cytosol [GO:0005829]; endoplasmic reticulum [GO:0005783]; endoplasmic reticulum membrane [GO:0005789]; Golgi apparatus [GO:0005794]; integral component of membrane [GO:0016021]; membrane [GO:0016020]; nuclear membrane [GO:0031965]; apoptotic process [GO:0006915]; macroautophagy [GO:0016236]; negative regulation of cell growth [GO:0030308]		GO:0005783; GO:0005789; GO:0005794; GO:0005829; GO:0006915; GO:0016020; GO:0016021; GO:0016236; GO:0030308; GO:0031965		SUBCELLULAR LOCATION: Nucleus membrane {ECO:0000269|PubMed:21154811}; Multi-pass membrane protein {ECO:0000269|PubMed:21154811}. Cytoplasm {ECO:0000269|PubMed:21154811}. Endoplasmic reticulum membrane {ECO:0000250}; Multi-pass membrane protein {ECO:0000250}.	TRANSMEM 77..97; /note="Helical"; /evidence="ECO:0000255"; TRANSMEM 117..137; /note="Helical"; /evidence="ECO:0000255"; TRANSMEM 179..199; /note="Helical"; /evidence="ECO:0000255"; TRANSMEM 238..255; /note="Helical"; /evidence="ECO:0000255"; TRANSMEM 257..277; /note="Helical"; /evidence="ECO:0000255"			Etoposide-induced protein 2.4 homolog OS=Homo sapiens OX=9606 GN=EI24 PE=1 SV=4 - [EI24_HUMAN]	2.35	1	1	1	1	0	0	0		0				0			1.99025	2.35	1	1	340	38.9397	9.71533
O14737	PDCD5	Programmed cell death protein 5 (TF-1 cell apoptosis-related protein 19) (Protein TFAR19)	FUNCTION: May function in the process of apoptosis.	apoptotic process [GO:0006915]; cellular response to transforming growth factor beta stimulus [GO:0071560]; negative regulation of cell population proliferation [GO:0008285]; negative regulation of chaperone-mediated protein folding [GO:1903645]; positive regulation of apoptotic process [GO:0043065]; positive regulation of cysteine-type endopeptidase activity involved in apoptotic process [GO:004…	cytoplasm [GO:0005737]; cytosol [GO:0005829]; extracellular exosome [GO:0070062]; nucleus [GO:0005634]	cytoplasm [GO:0005737]; cytosol [GO:0005829]; extracellular exosome [GO:0070062]; nucleus [GO:0005634]; acetyltransferase activator activity [GO:0010698]; beta-tubulin binding [GO:0048487]; DNA binding [GO:0003677]; heparin binding [GO:0008201]; apoptotic process [GO:0006915]; cellular response to transforming growth factor beta stimulus [GO:0071560]; negative regulation of cell population prolif…	acetyltransferase activator activity [GO:0010698]; beta-tubulin binding [GO:0048487]; DNA binding [GO:0003677]; heparin binding [GO:0008201]	GO:0003677; GO:0005634; GO:0005737; GO:0005829; GO:0006915; GO:0008201; GO:0008285; GO:0010628; GO:0010698; GO:0043065; GO:0043280; GO:0048487; GO:0070062; GO:0071560; GO:0090200; GO:1903638; GO:1903645						Programmed cell death protein 5 OS=Homo sapiens OX=9606 GN=PDCD5 PE=1 SV=3 - [PDCD5_HUMAN]	37.6	1	5	5	11	1.03174e+08	5.5335e+07	2.78042e+07	17.5901	36.8	4	6	5.88125	20	3	3	5.54957	19.2	2	2	125	14.2763	6.03662
O14744	ANM5	Protein arginine N-methyltransferase 5 (PRMT5) (EC 2.1.1.320) (72 kDa ICln-binding protein) (Histone-arginine N-methyltransferase PRMT5) (Jak-binding protein 1) (Shk1 kinase-binding protein 1 homolog) (SKB1 homolog) (SKB1Hs) [Cleaved into: Protein arginine N-methyltransferase 5, N-terminally processed]	FUNCTION: Arginine methyltransferase that can both catalyze the formation of omega-N monomethylarginine (MMA) and symmetrical dimethylarginine (sDMA), with a preference for the formation of MMA (PubMed:10531356, PubMed:11152681, PubMed:11747828, PubMed:12411503, PubMed:15737618, PubMed:17709427, PubMed:20159986, PubMed:20810653, PubMed:21258366, PubMed:21917714, PubMed:22269951, PubMed:21081503).…	circadian regulation of gene expression [GO:0032922]; DNA-templated transcription, termination [GO:0006353]; endothelial cell activation [GO:0042118]; Golgi ribbon formation [GO:0090161]; histone arginine methylation [GO:0034969]; histone H4-R3 methylation [GO:0043985]; liver regeneration [GO:0097421]; negative regulation of cell differentiation [GO:0045596]; peptidyl-arginine methylation [GO:001…	cytoplasm [GO:0005737]; cytosol [GO:0005829]; Golgi apparatus [GO:0005794]; histone methyltransferase complex [GO:0035097]; methylosome [GO:0034709]; nucleoplasm [GO:0005654]; nucleus [GO:0005634]	cytoplasm [GO:0005737]; cytosol [GO:0005829]; Golgi apparatus [GO:0005794]; histone methyltransferase complex [GO:0035097]; methylosome [GO:0034709]; nucleoplasm [GO:0005654]; nucleus [GO:0005634]; E-box binding [GO:0070888]; histone methyltransferase activity (H4-R3 specific) [GO:0044020]; histone-arginine N-methyltransferase activity [GO:0008469]; identical protein binding [GO:0042802]; methyl-…	E-box binding [GO:0070888]; histone-arginine N-methyltransferase activity [GO:0008469]; histone methyltransferase activity (H4-R3 specific) [GO:0044020]; identical protein binding [GO:0042802]; methyl-CpG binding [GO:0008327]; methyltransferase activity [GO:0008168]; p53 binding [GO:0002039]; protein-arginine N-methyltransferase activity [GO:0016274]; protein-arginine omega-N symmetric methyltran…	GO:0000387; GO:0002039; GO:0003714; GO:0005634; GO:0005654; GO:0005737; GO:0005794; GO:0005829; GO:0006353; GO:0006355; GO:0007088; GO:0008168; GO:0008327; GO:0008469; GO:0016274; GO:0018216; GO:0032922; GO:0034709; GO:0034969; GO:0035097; GO:0035243; GO:0035246; GO:0042118; GO:0042802; GO:0043021; GO:0043985; GO:0044020; GO:0044030; GO:0045596; GO:0046982; GO:0048714; GO:0070372; GO:0070888; GO:…		SUBCELLULAR LOCATION: Cytoplasm {ECO:0000269|PubMed:21081503, ECO:0000269|PubMed:21917714, ECO:0000269|PubMed:22269951}. Nucleus {ECO:0000269|PubMed:18404153, ECO:0000269|PubMed:21081503, ECO:0000269|PubMed:21917714, ECO:0000269|PubMed:22269951}. Golgi apparatus {ECO:0000269|PubMed:20421892}.				Protein arginine N-methyltransferase 5 OS=Homo sapiens OX=9606 GN=PRMT5 PE=1 SV=4 - [ANM5_HUMAN]	27.79	1	11	11	38	1.43532e+08	1.6364e+08	5.2446e+07	44.8629	24.18	9	14	37.9112	19.62	8	14	27.7796	24.96	9	10	637	72.6376	6.29053
O14745	NHRF1	Na(+)/H(+) exchange regulatory cofactor NHE-RF1 (NHERF-1) (Ezrin-radixin-moesin-binding phosphoprotein 50) (EBP50) (Regulatory cofactor of Na(+)/H(+) exchanger) (Sodium-hydrogen exchanger regulatory factor 1) (Solute carrier family 9 isoform A3 regulatory factor 1)	FUNCTION: Scaffold protein that connects plasma membrane proteins with members of the ezrin/moesin/radixin family and thereby helps to link them to the actin cytoskeleton and to regulate their surface expression. Necessary for recycling of internalized ADRB2. Was first known to play a role in the regulation of the activity and subcellular location of SLC9A3. Necessary for cAMP-mediated phosphoryl…	actin cytoskeleton organization [GO:0030036]; adenylate cyclase-activating dopamine receptor signaling pathway [GO:0007191]; auditory receptor cell stereocilium organization [GO:0060088]; bile acid secretion [GO:0032782]; cellular phosphate ion homeostasis [GO:0030643]; cerebrospinal fluid circulation [GO:0090660]; cilium organization [GO:0044782]; establishment of epithelial cell apical/basal po…	actin cytoskeleton [GO:0015629]; apical plasma membrane [GO:0016324]; brush border membrane [GO:0031526]; cell [GO:0005623]; cell periphery [GO:0071944]; cytoplasm [GO:0005737]; endomembrane system [GO:0012505]; extracellular exosome [GO:0070062]; filopodium [GO:0030175]; membrane [GO:0016020]; membrane raft [GO:0045121]; microvillus [GO:0005902]; microvillus membrane [GO:0031528]; perinuclear re…	actin cytoskeleton [GO:0015629]; apical plasma membrane [GO:0016324]; brush border membrane [GO:0031526]; cell [GO:0005623]; cell periphery [GO:0071944]; cytoplasm [GO:0005737]; endomembrane system [GO:0012505]; extracellular exosome [GO:0070062]; filopodium [GO:0030175]; membrane [GO:0016020]; membrane raft [GO:0045121]; microvillus [GO:0005902]; microvillus membrane [GO:0031528]; perinuclear re…	beta-2 adrenergic receptor binding [GO:0031698]; beta-catenin binding [GO:0008013]; chloride channel regulator activity [GO:0017081]; dopamine receptor binding [GO:0050780]; gamma-aminobutyric acid transmembrane transporter activity [GO:0015185]; growth factor receptor binding [GO:0070851]; molecular adaptor activity [GO:0060090]; myosin II binding [GO:0045159]; PDZ domain binding [GO:0030165]; p…	GO:0001726; GO:0002009; GO:0003096; GO:0005102; GO:0005623; GO:0005737; GO:0005902; GO:0007009; GO:0007097; GO:0007191; GO:0007605; GO:0008013; GO:0008285; GO:0008360; GO:0008361; GO:0010642; GO:0012505; GO:0014067; GO:0015185; GO:0015629; GO:0016020; GO:0016055; GO:0016324; GO:0017081; GO:0019902; GO:0022612; GO:0030033; GO:0030036; GO:0030165; GO:0030175; GO:0030336; GO:0030643; GO:0031526; GO:…		SUBCELLULAR LOCATION: Cytoplasm {ECO:0000250}. Apical cell membrane {ECO:0000250}. Endomembrane system; Peripheral membrane protein. Cell projection, filopodium. Cell projection, ruffle. Cell projection, microvillus. Note=Translocates from the cytoplasm to the apical cell membrane in a PODXL-dependent manner. Colocalizes with CFTR at the midpiece of sperm tail (By similarity). Colocalizes with ac…				Na(+)/H(+) exchange regulatory cofactor NHE-RF1 OS=Homo sapiens OX=9606 GN=SLC9A3R1 PE=1 SV=4 - [NHRF1_HUMAN]	2.79	1	1	1	1	10804875	0	0	1.80667	2.79	1	1		0				0			358	38.8446	5.77002
O14773	TPP1	Tripeptidyl-peptidase 1 (TPP-1) (EC 3.4.14.9) (Cell growth-inhibiting gene 1 protein) (Lysosomal pepstatin-insensitive protease) (LPIC) (Tripeptidyl aminopeptidase) (Tripeptidyl-peptidase I) (TPP-I)	FUNCTION: Lysosomal serine protease with tripeptidyl-peptidase I activity (PubMed:11054422, PubMed:19038966, PubMed:19038967). May act as a non-specific lysosomal peptidase which generates tripeptides from the breakdown products produced by lysosomal proteinases (PubMed:11054422, PubMed:19038966, PubMed:19038967). Requires substrates with an unsubstituted N-terminus (PubMed:19038966). {ECO:000026…	bone resorption [GO:0045453]; central nervous system development [GO:0007417]; epithelial cell differentiation [GO:0030855]; IRE1-mediated unfolded protein response [GO:0036498]; lipid metabolic process [GO:0006629]; lysosome organization [GO:0007040]; nervous system development [GO:0007399]; neuromuscular process controlling balance [GO:0050885]; peptide catabolic process [GO:0043171]; protein c…	extracellular exosome [GO:0070062]; Golgi apparatus [GO:0005794]; lysosomal lumen [GO:0043202]; lysosome [GO:0005764]; melanosome [GO:0042470]; membrane raft [GO:0045121]; recycling endosome [GO:0055037]	extracellular exosome [GO:0070062]; Golgi apparatus [GO:0005794]; lysosomal lumen [GO:0043202]; lysosome [GO:0005764]; melanosome [GO:0042470]; membrane raft [GO:0045121]; recycling endosome [GO:0055037]; endopeptidase activity [GO:0004175]; lysophosphatidic acid binding [GO:0035727]; metal ion binding [GO:0046872]; peptidase activity [GO:0008233]; peptide binding [GO:0042277]; serine-type endope…	endopeptidase activity [GO:0004175]; lysophosphatidic acid binding [GO:0035727]; metal ion binding [GO:0046872]; peptidase activity [GO:0008233]; peptide binding [GO:0042277]; serine-type endopeptidase activity [GO:0004252]; serine-type peptidase activity [GO:0008236]; sulfatide binding [GO:0120146]; tripeptidyl-peptidase activity [GO:0008240]	GO:0004175; GO:0004252; GO:0005764; GO:0005794; GO:0006508; GO:0006629; GO:0007040; GO:0007399; GO:0007417; GO:0008233; GO:0008236; GO:0008240; GO:0030163; GO:0030855; GO:0035727; GO:0036498; GO:0042277; GO:0042470; GO:0043171; GO:0043202; GO:0045121; GO:0045453; GO:0046872; GO:0050885; GO:0055037; GO:0070062; GO:0070198; GO:0120146		SUBCELLULAR LOCATION: Lysosome {ECO:0000269|PubMed:19941651}. Melanosome {ECO:0000269|PubMed:12643545}. Note=Identified by mass spectrometry in melanosome fractions from stage I to stage IV. {ECO:0000269|PubMed:12643545}.				Tripeptidyl-peptidase 1 OS=Homo sapiens OX=9606 GN=TPP1 PE=1 SV=2 - [TPP1_HUMAN]	17.41	1	5	5	15	4.63413e+07	2.0534e+08	1.50129e+08	4.88336	8.17	3	3	15.9402	17.41	5	6	15.5739	17.41	5	6	563	61.2096	6.48096
O14776	TCRG1	Transcription elongation regulator 1 (TATA box-binding protein-associated factor 2S) (Transcription factor CA150)	FUNCTION: Transcription factor that binds RNA polymerase II and inhibits the elongation of transcripts from target promoters. Regulates transcription elongation in a TATA box-dependent manner. Necessary for TAT-dependent activation of the human immunodeficiency virus type 1 (HIV-1) promoter. {ECO:0000269|PubMed:11604498, ECO:0000269|PubMed:9315662}.	negative regulation of transcription by RNA polymerase II [GO:0000122]; transcription by RNA polymerase II [GO:0006366]	nucleoplasm [GO:0005654]; nucleus [GO:0005634]	nucleoplasm [GO:0005654]; nucleus [GO:0005634]; identical protein binding [GO:0042802]; proline-rich region binding [GO:0070064]; RNA binding [GO:0003723]; RNA polymerase binding [GO:0070063]; RNA polymerase II repressing transcription factor binding [GO:0001103]; transcription coactivator activity [GO:0003713]; transcription coregulator activity [GO:0003712]; transcription corepressor activity […	identical protein binding [GO:0042802]; proline-rich region binding [GO:0070064]; RNA binding [GO:0003723]; RNA polymerase binding [GO:0070063]; RNA polymerase II repressing transcription factor binding [GO:0001103]; transcription coactivator activity [GO:0003713]; transcription coregulator activity [GO:0003712]; transcription corepressor activity [GO:0003714]	GO:0000122; GO:0001103; GO:0003712; GO:0003713; GO:0003714; GO:0003723; GO:0005634; GO:0005654; GO:0006366; GO:0042802; GO:0070063; GO:0070064		SUBCELLULAR LOCATION: Nucleus {ECO:0000269|PubMed:10908677, ECO:0000269|PubMed:15485897, ECO:0000269|PubMed:9315662}.				Transcription elongation regulator 1 OS=Homo sapiens OX=9606 GN=TCERG1 PE=1 SV=2 - [TCRG1_HUMAN]	4.74	1	4	4	6	0	4.02436e+07	22034857		0			5.98508	3.73	3	3	7.68656	3.46	3	3	1098	123.823	8.646
O14818	PSA7	Proteasome subunit alpha type-7 (EC 3.4.25.1) (Proteasome subunit RC6-1) (Proteasome subunit XAPC7)	FUNCTION: Component of the 20S core proteasome complex involved in the proteolytic degradation of most intracellular proteins. This complex plays numerous essential roles within the cell by associating with different regulatory particles. Associated with two 19S regulatory particles, forms the 26S proteasome and thus participates in the ATP-dependent degradation of ubiquitinated proteins. The 26S…	anaphase-promoting complex-dependent catabolic process [GO:0031145]; antigen processing and presentation of exogenous peptide antigen via MHC class I, TAP-dependent [GO:0002479]; Fc-epsilon receptor signaling pathway [GO:0038095]; interleukin-1-mediated signaling pathway [GO:0070498]; MAPK cascade [GO:0000165]; negative regulation of canonical Wnt signaling pathway [GO:0090090]; negative regulati…	cytoplasm [GO:0005737]; cytosol [GO:0005829]; extracellular exosome [GO:0070062]; nucleoplasm [GO:0005654]; nucleus [GO:0005634]; postsynapse [GO:0098794]; proteasome complex [GO:0000502]; proteasome core complex [GO:0005839]; proteasome core complex, alpha-subunit complex [GO:0019773]	cytoplasm [GO:0005737]; cytosol [GO:0005829]; extracellular exosome [GO:0070062]; nucleoplasm [GO:0005654]; nucleus [GO:0005634]; postsynapse [GO:0098794]; proteasome complex [GO:0000502]; proteasome core complex [GO:0005839]; proteasome core complex, alpha-subunit complex [GO:0019773]; endopeptidase activity [GO:0004175]; identical protein binding [GO:0042802]; threonine-type endopeptidase activ…	endopeptidase activity [GO:0004175]; identical protein binding [GO:0042802]; threonine-type endopeptidase activity [GO:0004298]	GO:0000165; GO:0000209; GO:0000502; GO:0002223; GO:0002479; GO:0004175; GO:0004298; GO:0005634; GO:0005654; GO:0005737; GO:0005829; GO:0005839; GO:0006521; GO:0010498; GO:0010499; GO:0010972; GO:0016032; GO:0016579; GO:0019773; GO:0031145; GO:0031146; GO:0033209; GO:0038061; GO:0038095; GO:0042802; GO:0043161; GO:0043488; GO:0043687; GO:0050852; GO:0055085; GO:0060071; GO:0061418; GO:0070062; GO:…		SUBCELLULAR LOCATION: Cytoplasm {ECO:0000269|PubMed:12181345}. Nucleus {ECO:0000269|PubMed:12181345}.				Proteasome subunit alpha type-7 OS=Homo sapiens OX=9606 GN=PSMA7 PE=1 SV=1 - [PSA7_HUMAN]	45.97	2	10	10	64	7.80752e+08	6.43183e+08	4.86316e+08	66.9512	45.56	9	20	76.9792	45.97	10	21	84.0005	45.97	10	23	248	27.8696	8.45557
O14828	SCAM3	Secretory carrier-associated membrane protein 3 (Secretory carrier membrane protein 3)	FUNCTION: Functions in post-Golgi recycling pathways. Acts as a recycling carrier to the cell surface.	post-Golgi vesicle-mediated transport [GO:0006892]; protein transport [GO:0015031]	extracellular exosome [GO:0070062]; Golgi apparatus [GO:0005794]; Golgi membrane [GO:0000139]; integral component of membrane [GO:0016021]; intracellular membrane-bounded organelle [GO:0043231]; recycling endosome membrane [GO:0055038]; trans-Golgi network membrane [GO:0032588]	extracellular exosome [GO:0070062]; Golgi apparatus [GO:0005794]; Golgi membrane [GO:0000139]; integral component of membrane [GO:0016021]; intracellular membrane-bounded organelle [GO:0043231]; recycling endosome membrane [GO:0055038]; trans-Golgi network membrane [GO:0032588]; ubiquitin protein ligase binding [GO:0031625]; post-Golgi vesicle-mediated transport [GO:0006892]; protein transport [G…	ubiquitin protein ligase binding [GO:0031625]	GO:0000139; GO:0005794; GO:0006892; GO:0015031; GO:0016021; GO:0031625; GO:0032588; GO:0043231; GO:0055038; GO:0070062		SUBCELLULAR LOCATION: Membrane; Multi-pass membrane protein.	TRANSMEM 171..191; /note="Helical"; /evidence="ECO:0000255"; TRANSMEM 197..217; /note="Helical"; /evidence="ECO:0000255"; TRANSMEM 247..267; /note="Helical"; /evidence="ECO:0000255"; TRANSMEM 277..297; /note="Helical"; /evidence="ECO:0000255"			Secretory carrier-associated membrane protein 3 OS=Homo sapiens OX=9606 GN=SCAMP3 PE=1 SV=3 - [SCAM3_HUMAN]	36.31	1	7	7	29	5.90531e+07	79706158	5.30305e+07	35.8353	28.24	6	10	32.4339	36.31	7	9	38.5913	19.31	5	10	347	38.2623	7.63525
O14874	BCKD	[3-methyl-2-oxobutanoate dehydrogenase [lipoamide]] kinase, mitochondrial (EC 2.7.11.4) (Branched-chain alpha-ketoacid dehydrogenase kinase) (BCKD-kinase) (BCKDHKIN)	FUNCTION: Catalyzes the phosphorylation and inactivation of the branched-chain alpha-ketoacid dehydrogenase complex, the key regulatory enzyme of the valine, leucine and isoleucine catabolic pathways. Key enzyme that regulate the activity state of the BCKD complex. {ECO:0000269|PubMed:24449431}.	branched-chain amino acid catabolic process [GO:0009083]; cellular amino acid catabolic process [GO:0009063]; glucose homeostasis [GO:0042593]; negative regulation of pyruvate dehydrogenase activity [GO:1904183]; phosphorylation [GO:0016310]	mitochondrial alpha-ketoglutarate dehydrogenase complex [GO:0005947]; mitochondrial matrix [GO:0005759]; mitochondrion [GO:0005739]	mitochondrial alpha-ketoglutarate dehydrogenase complex [GO:0005947]; mitochondrial matrix [GO:0005759]; mitochondrion [GO:0005739]; [3-methyl-2-oxobutanoate dehydrogenase (acetyl-transferring)] kinase activity [GO:0047323]; ATP binding [GO:0005524]; kinase activity [GO:0016301]; protein serine/threonine kinase activity [GO:0004674]; branched-chain amino acid catabolic process [GO:0009083]; cellu…	[3-methyl-2-oxobutanoate dehydrogenase (acetyl-transferring)] kinase activity [GO:0047323]; ATP binding [GO:0005524]; kinase activity [GO:0016301]; protein serine/threonine kinase activity [GO:0004674]	GO:0004674; GO:0005524; GO:0005739; GO:0005759; GO:0005947; GO:0009063; GO:0009083; GO:0016301; GO:0016310; GO:0042593; GO:0047323; GO:1904183		SUBCELLULAR LOCATION: Mitochondrion matrix. Mitochondrion {ECO:0000269|PubMed:24449431}.				[3-methyl-2-oxobutanoate dehydrogenase [lipoamide]] kinase, mitochondrial OS=Homo sapiens OX=9606 GN=BCKDK PE=1 SV=2 - [BCKD_HUMAN]	2.67	1	1	1	5	0	2.61236e+07	0	2.50026	2.67	1	1	5.06055	2.67	1	2	5.11421	2.67	1	2	412	46.3312	8.82178
[truncated: 3,294 more rows]

## Sheet: less upregulated in BAFFsi
Accession	GenSymbol	# PSM Csi	# PSM Csi+IR	# PSM BAFFsi+IR	UP Csi IR/Csi	DOWN BAFF IR/Csi IR
Q12769	NU160	5	7	1	1.4	0.142857
Q9NZM1	MYOF	1	6	1	6	0.166667
Q7KZ85	SPT6H	3	6	1	2	0.166667		Filters applied in this Table:
Q9Y6B6	SAR1B	4	8	2	2	0.25		[FC]>1.3
P19878	NCF2	5	7	2	1.4	0.285714		sorted by lowest ratio BAFFsi IR/Csi IR
Q15005	SPCS2	5	10	3	2	0.3
P16435	NCPR	4	13	4	3.25	0.307692
Q10588	BST1	2	6	2	3	0.333333
Q9Y5L4	TIM13	3	6	2	2	0.333333
P28331	NDUS1	7	11	4	1.57143	0.363636
Q5JTV8	TOIP1	7	12	5	1.71429	0.416667
Q5TEJ8	THMS2	3	7	3	2.33333	0.428571
P19012	K1C15	5	7	3	1.4	0.428571
Q92896	GSLG1	8	11	5	1.375	0.454545
Q3KQV9	UAP1L	1	6	3	6	0.5
Q9UNH7	SNX6	2	6	3	3	0.5
Q9NUJ1	ABHDA	3	8	4	2.66667	0.5
Q8IYM9	TRI22	3	6	3	2	0.5
Q9H074	PAIP1	3	6	3	2	0.5
Q53H82	LACB2	6	10	5	1.66667	0.5
P18583	SON	5	8	4	1.6	0.5
P25325	THTM	4	6	3	1.5	0.5
Q7Z4Q2	HEAT3	4	6	3	1.5	0.5
Q9UI10	EI2BD	4	6	3	1.5	0.5
Q8IV08	PLD3	6	8	4	1.33333	0.5
P08574	CY1	13	17	9	1.30769	0.529412
P09488	GSTM1	4	9	5	2.25	0.555556
Q969V3	NCLN	4	9	5	2.25	0.555556
O43488	ARK72	5	9	5	1.8	0.555556
Q92930	RAB8B	5	9	5	1.8	0.555556
Q8N766	EMC1	6	9	5	1.5	0.555556
Q9Y3B3	TMED7	1	7	4	7	0.571429
Q9UJY4	GGA2	3	7	4	2.33333	0.571429
Q12834	CDC20	4	7	4	1.75	0.571429
P55160	NCKPL	5	7	4	1.4	0.571429
Q15424	SAFB1	5	7	4	1.4	0.571429
Q9HB58	SP110	5	7	4	1.4	0.571429
Q15646	OASL	2	12	7	6	0.583333
P16885	PLCG2	5	10	6	2	0.6
P61006	RAB8A	7	10	6	1.42857	0.6
P43490	NAMPT	11	15	9	1.36364	0.6
Q9BWM7	SFXN3	14	23	14	1.64286	0.608696
P09601	HMOX1	5	13	8	2.6	0.615385
O14561	ACPM	3	8	5	2.66667	0.625
Q96BY6	DOC10	4	8	5	2	0.625
Q9Y2Q5	LTOR2	4	8	5	2	0.625
P53597	SUCA	5	8	5	1.6	0.625
P61077	UB2D3	6	8	5	1.33333	0.625
Q29RF7	PDS5A	6	8	5	1.33333	0.625
Q96C19	EFHD2	7	11	7	1.57143	0.636364
[truncated: 57 more rows]

## Sheet: less upregulated with PSM>15
Accession	GenSymbol	# PSM Csi	# PSM Csi+IR	# PSM BAFFsi+IR	UP Csi IR/Csi	DOWN BAFF IR/Csi IR
[truncated: 18 more rows]

[truncated: 1 more sheets: less downregulated in BAFFsi]
