# Supplementary material for: Pleiotropic effects of BAFF on the senescence-associated secretome and growth arrest
Source: eLife journal article supplement (doi:10.7554/elife.84238), 2023-03-27

A

WI-38 Phospho-kinase array

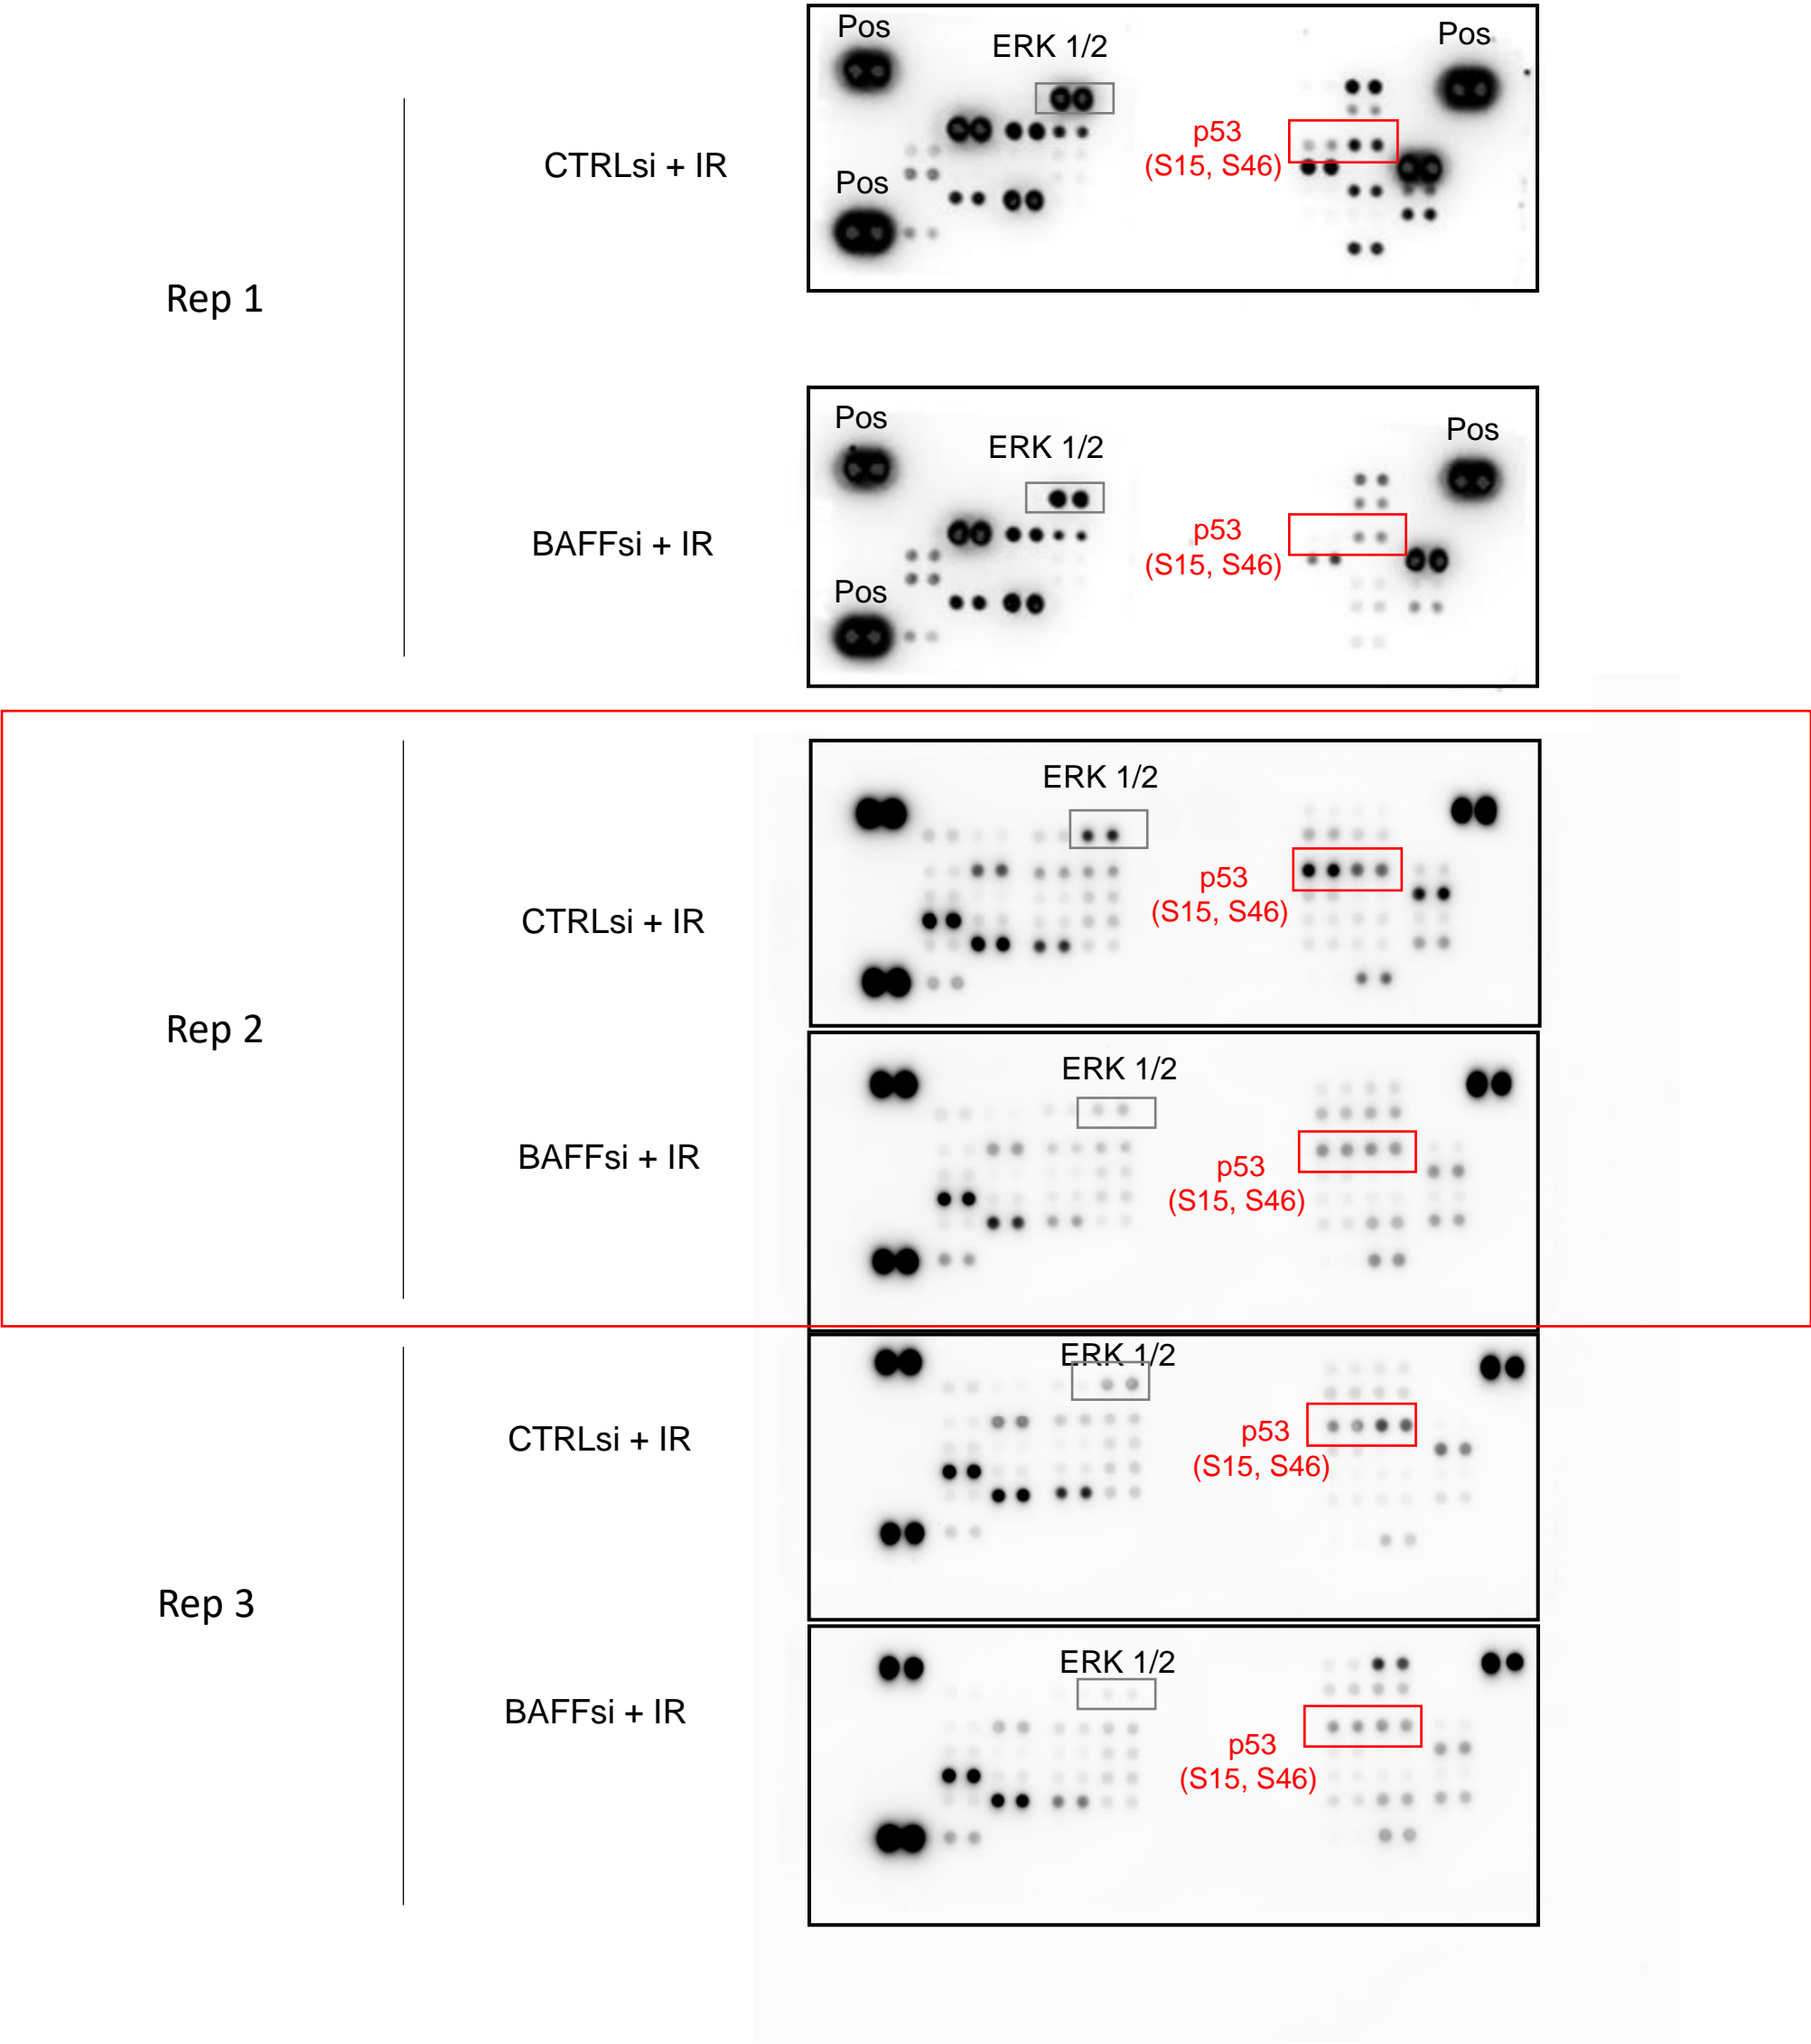

B

IMR-90

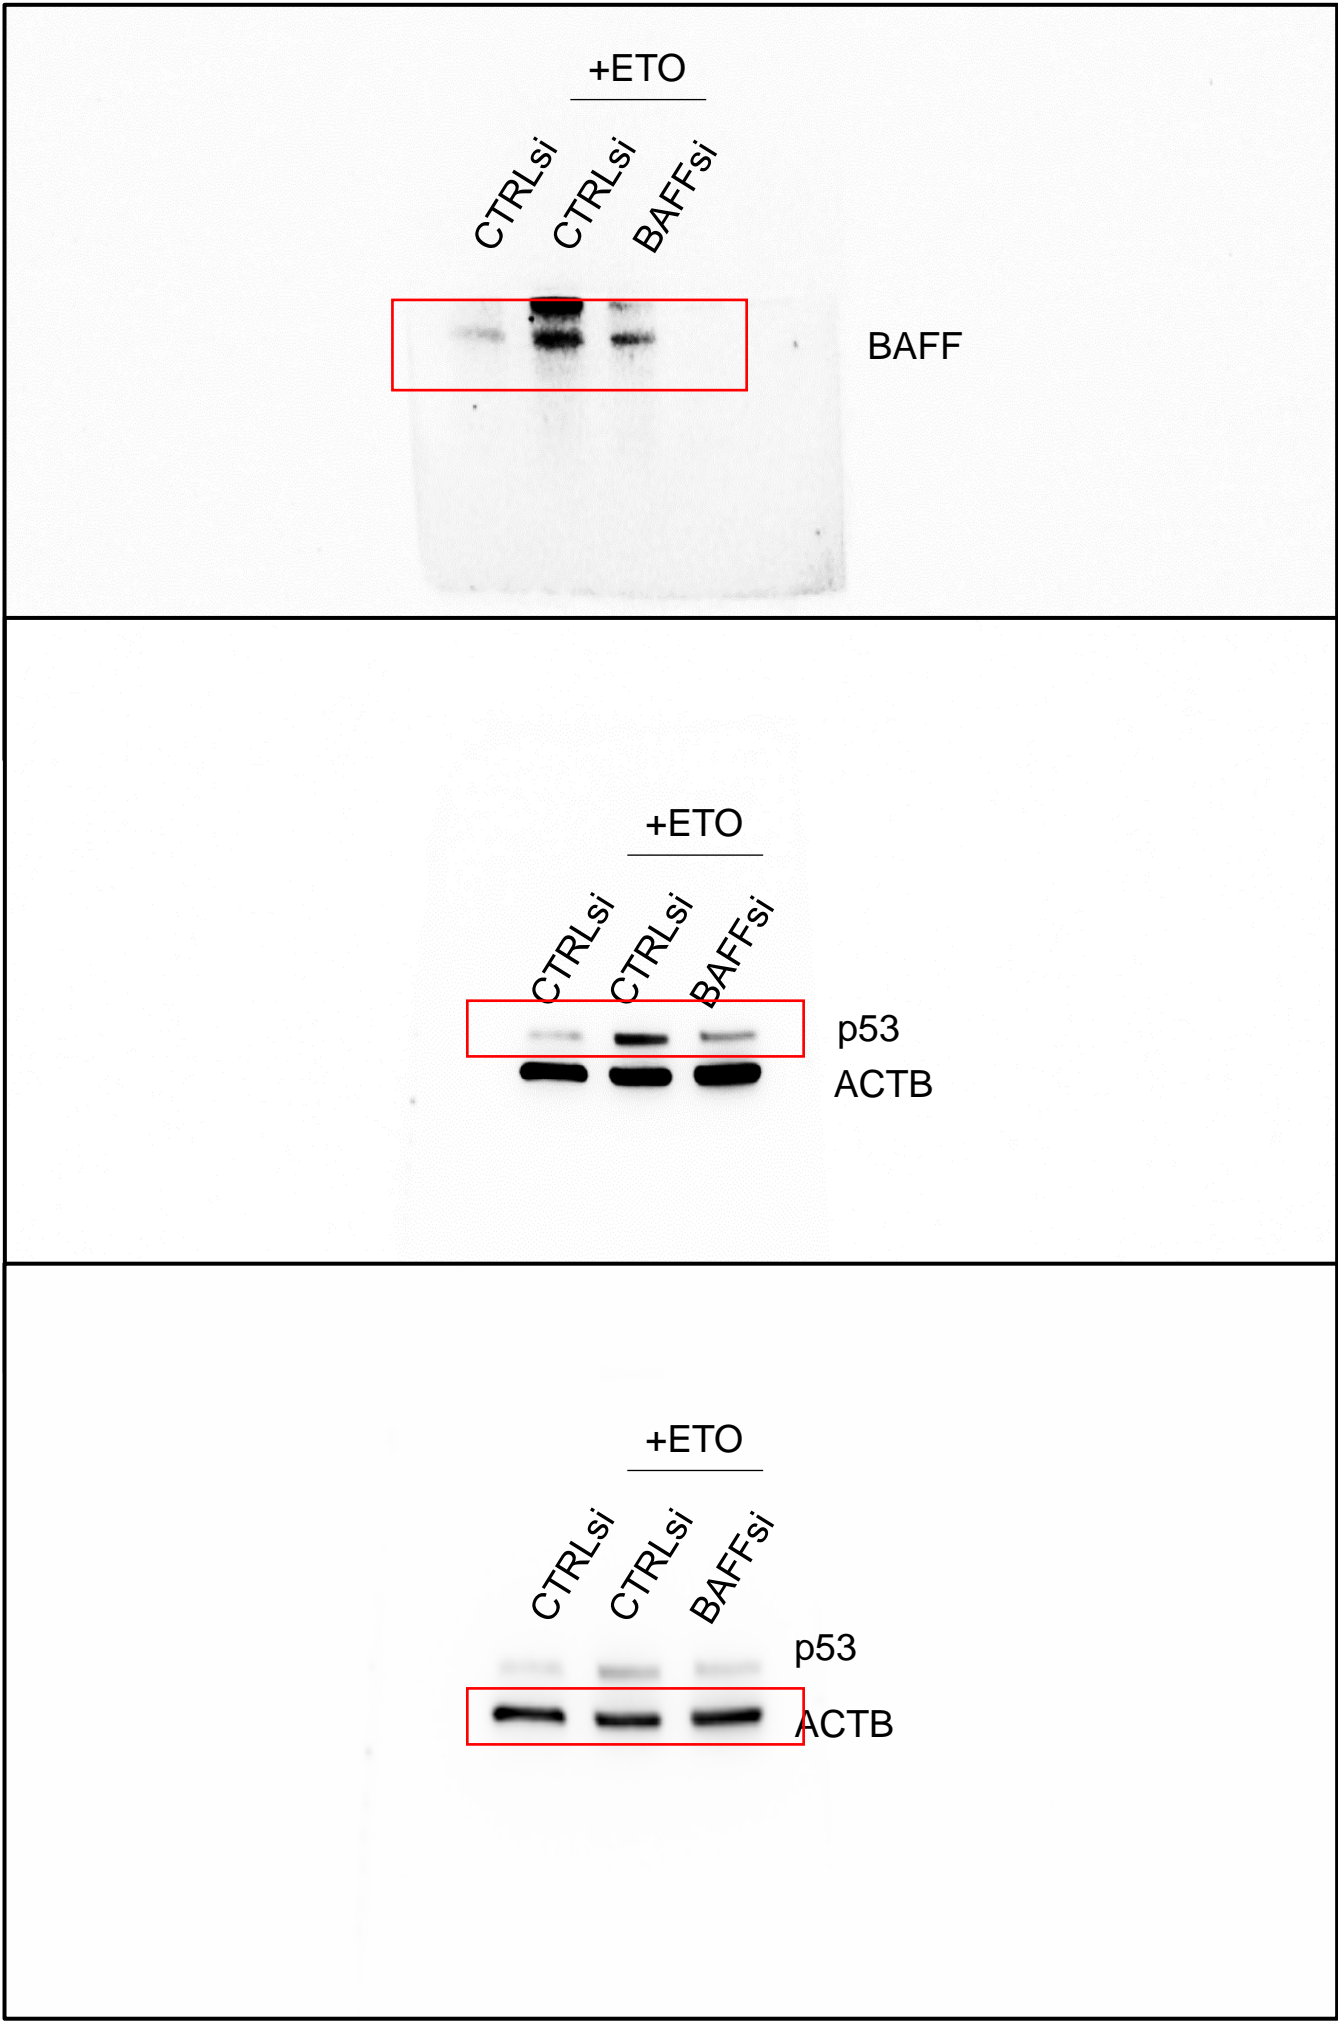

B,C

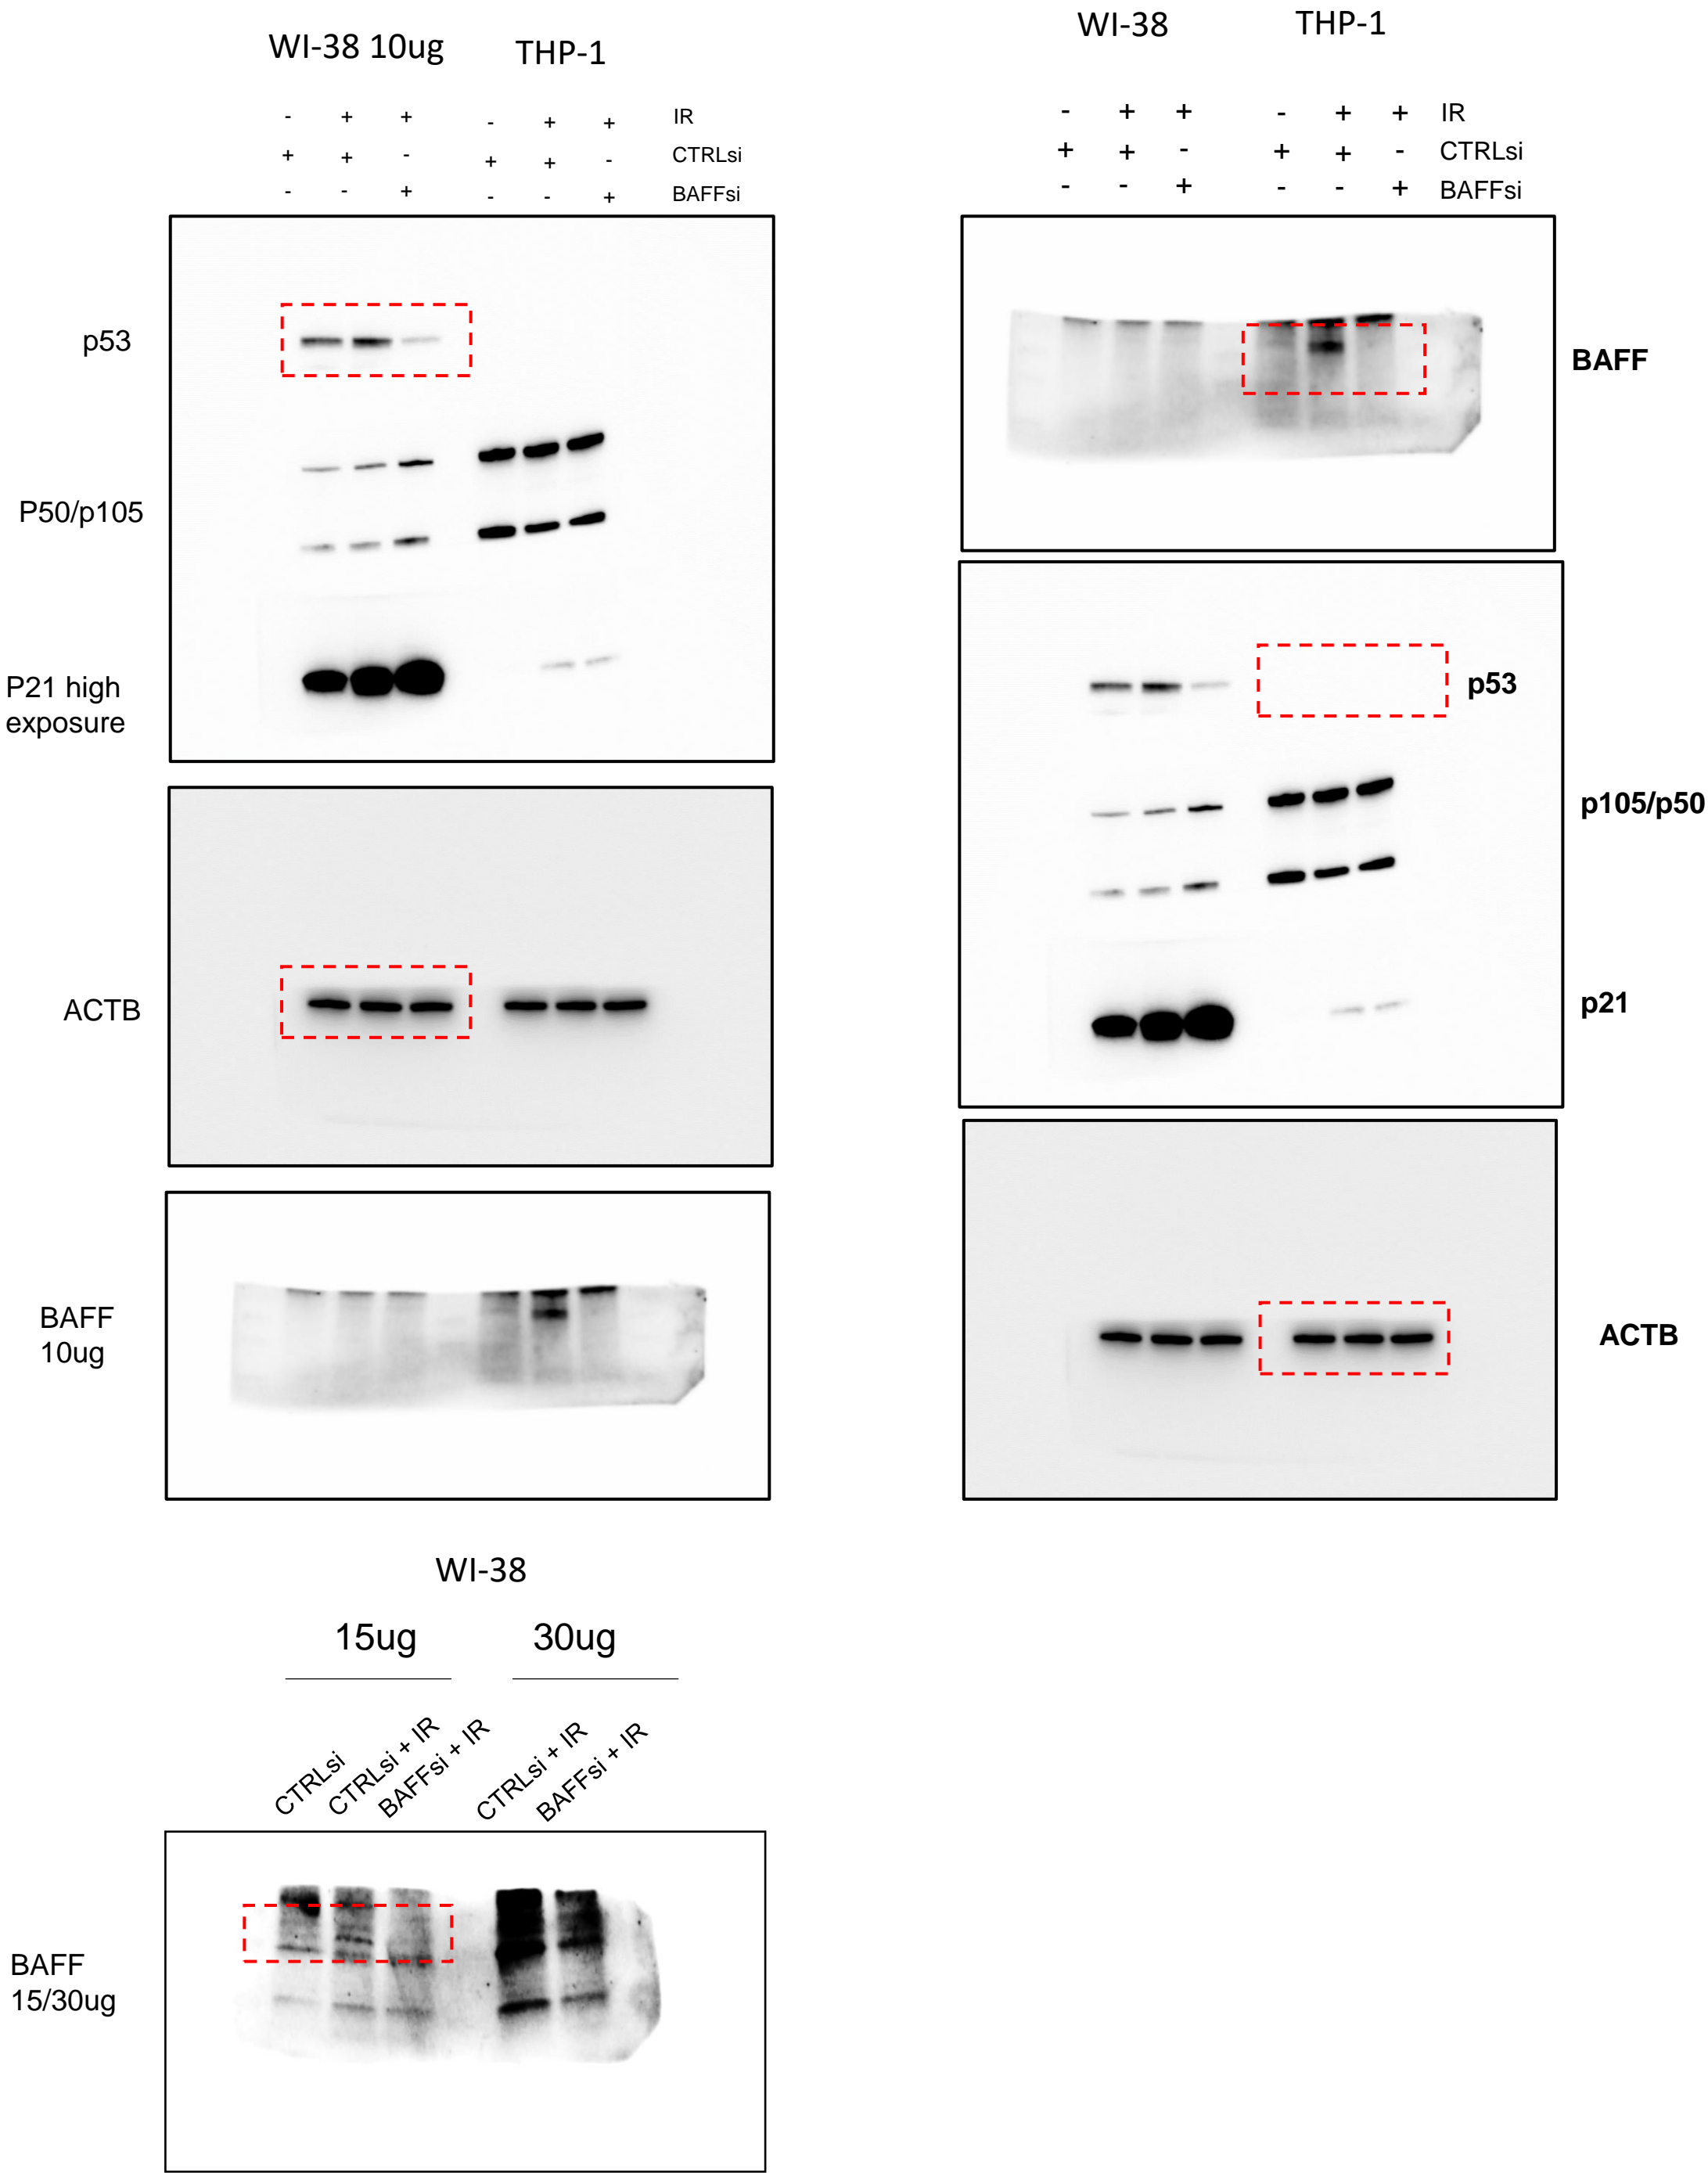

BAFF

p53

p105/p50

p21

ACTB

WI-38

15ug

30ug

CTRLsi

CTRLsi + IR

BAFFsi + IR

CTRLsi + IR

BAFFsi + IR

BAFF 15/30ug

C

RAW 264.7

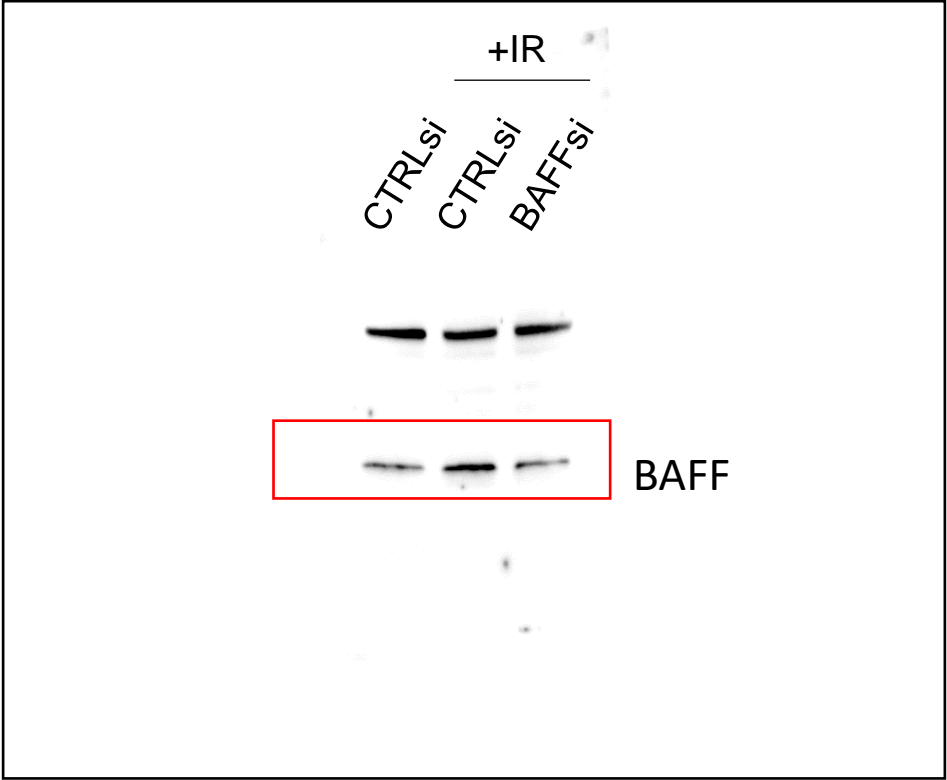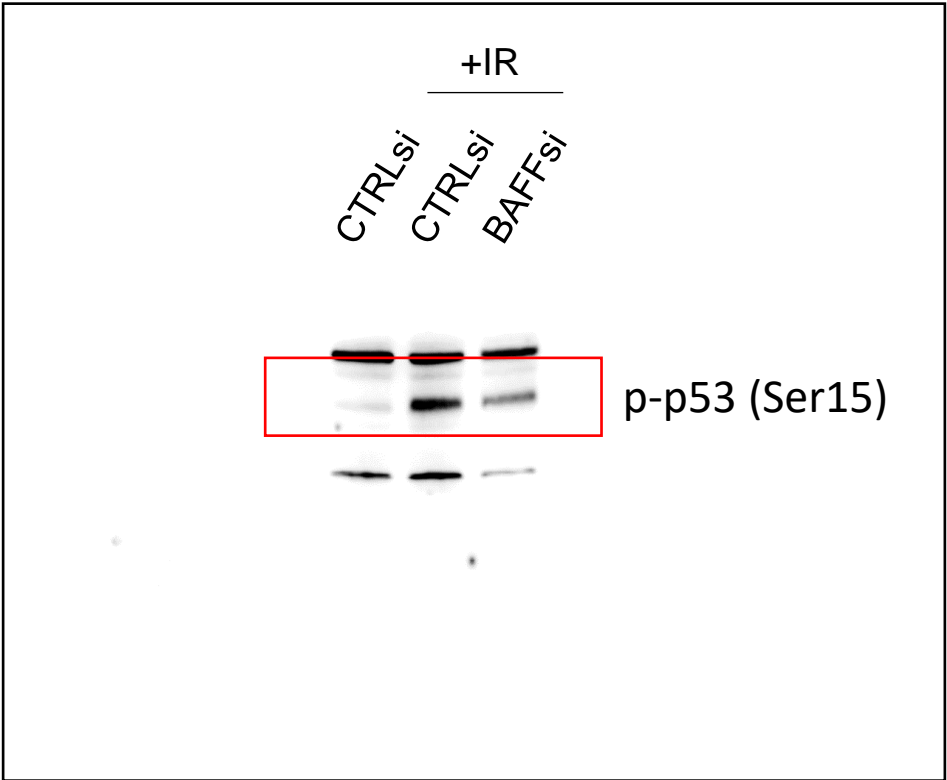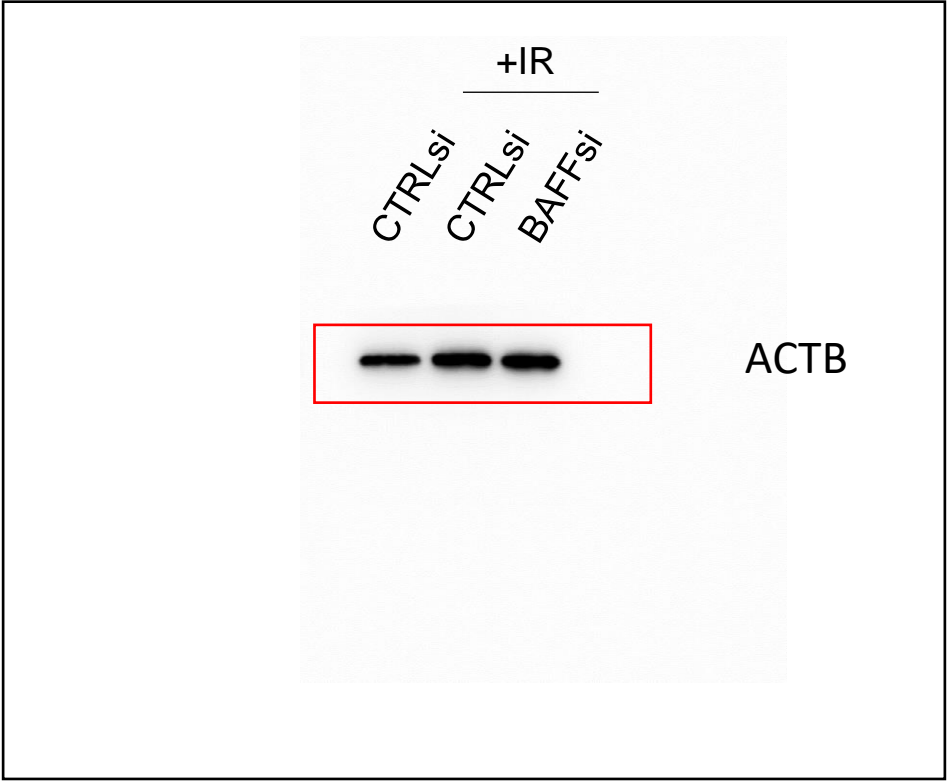

Supplement: fig7-data1 [file uncropped blots Fig 7.pdf › z Figure 7-Source Data 1/Figure 7-Source Data 1/uncropped blots Fig 7.pdf]
