# Supplementary figures and images for: Pleiotropic effects of BAFF on the senescence-associated secretome and growth arrest
Source: eLife journal article supplement (doi:10.7554/elife.84238), 2023-03-27

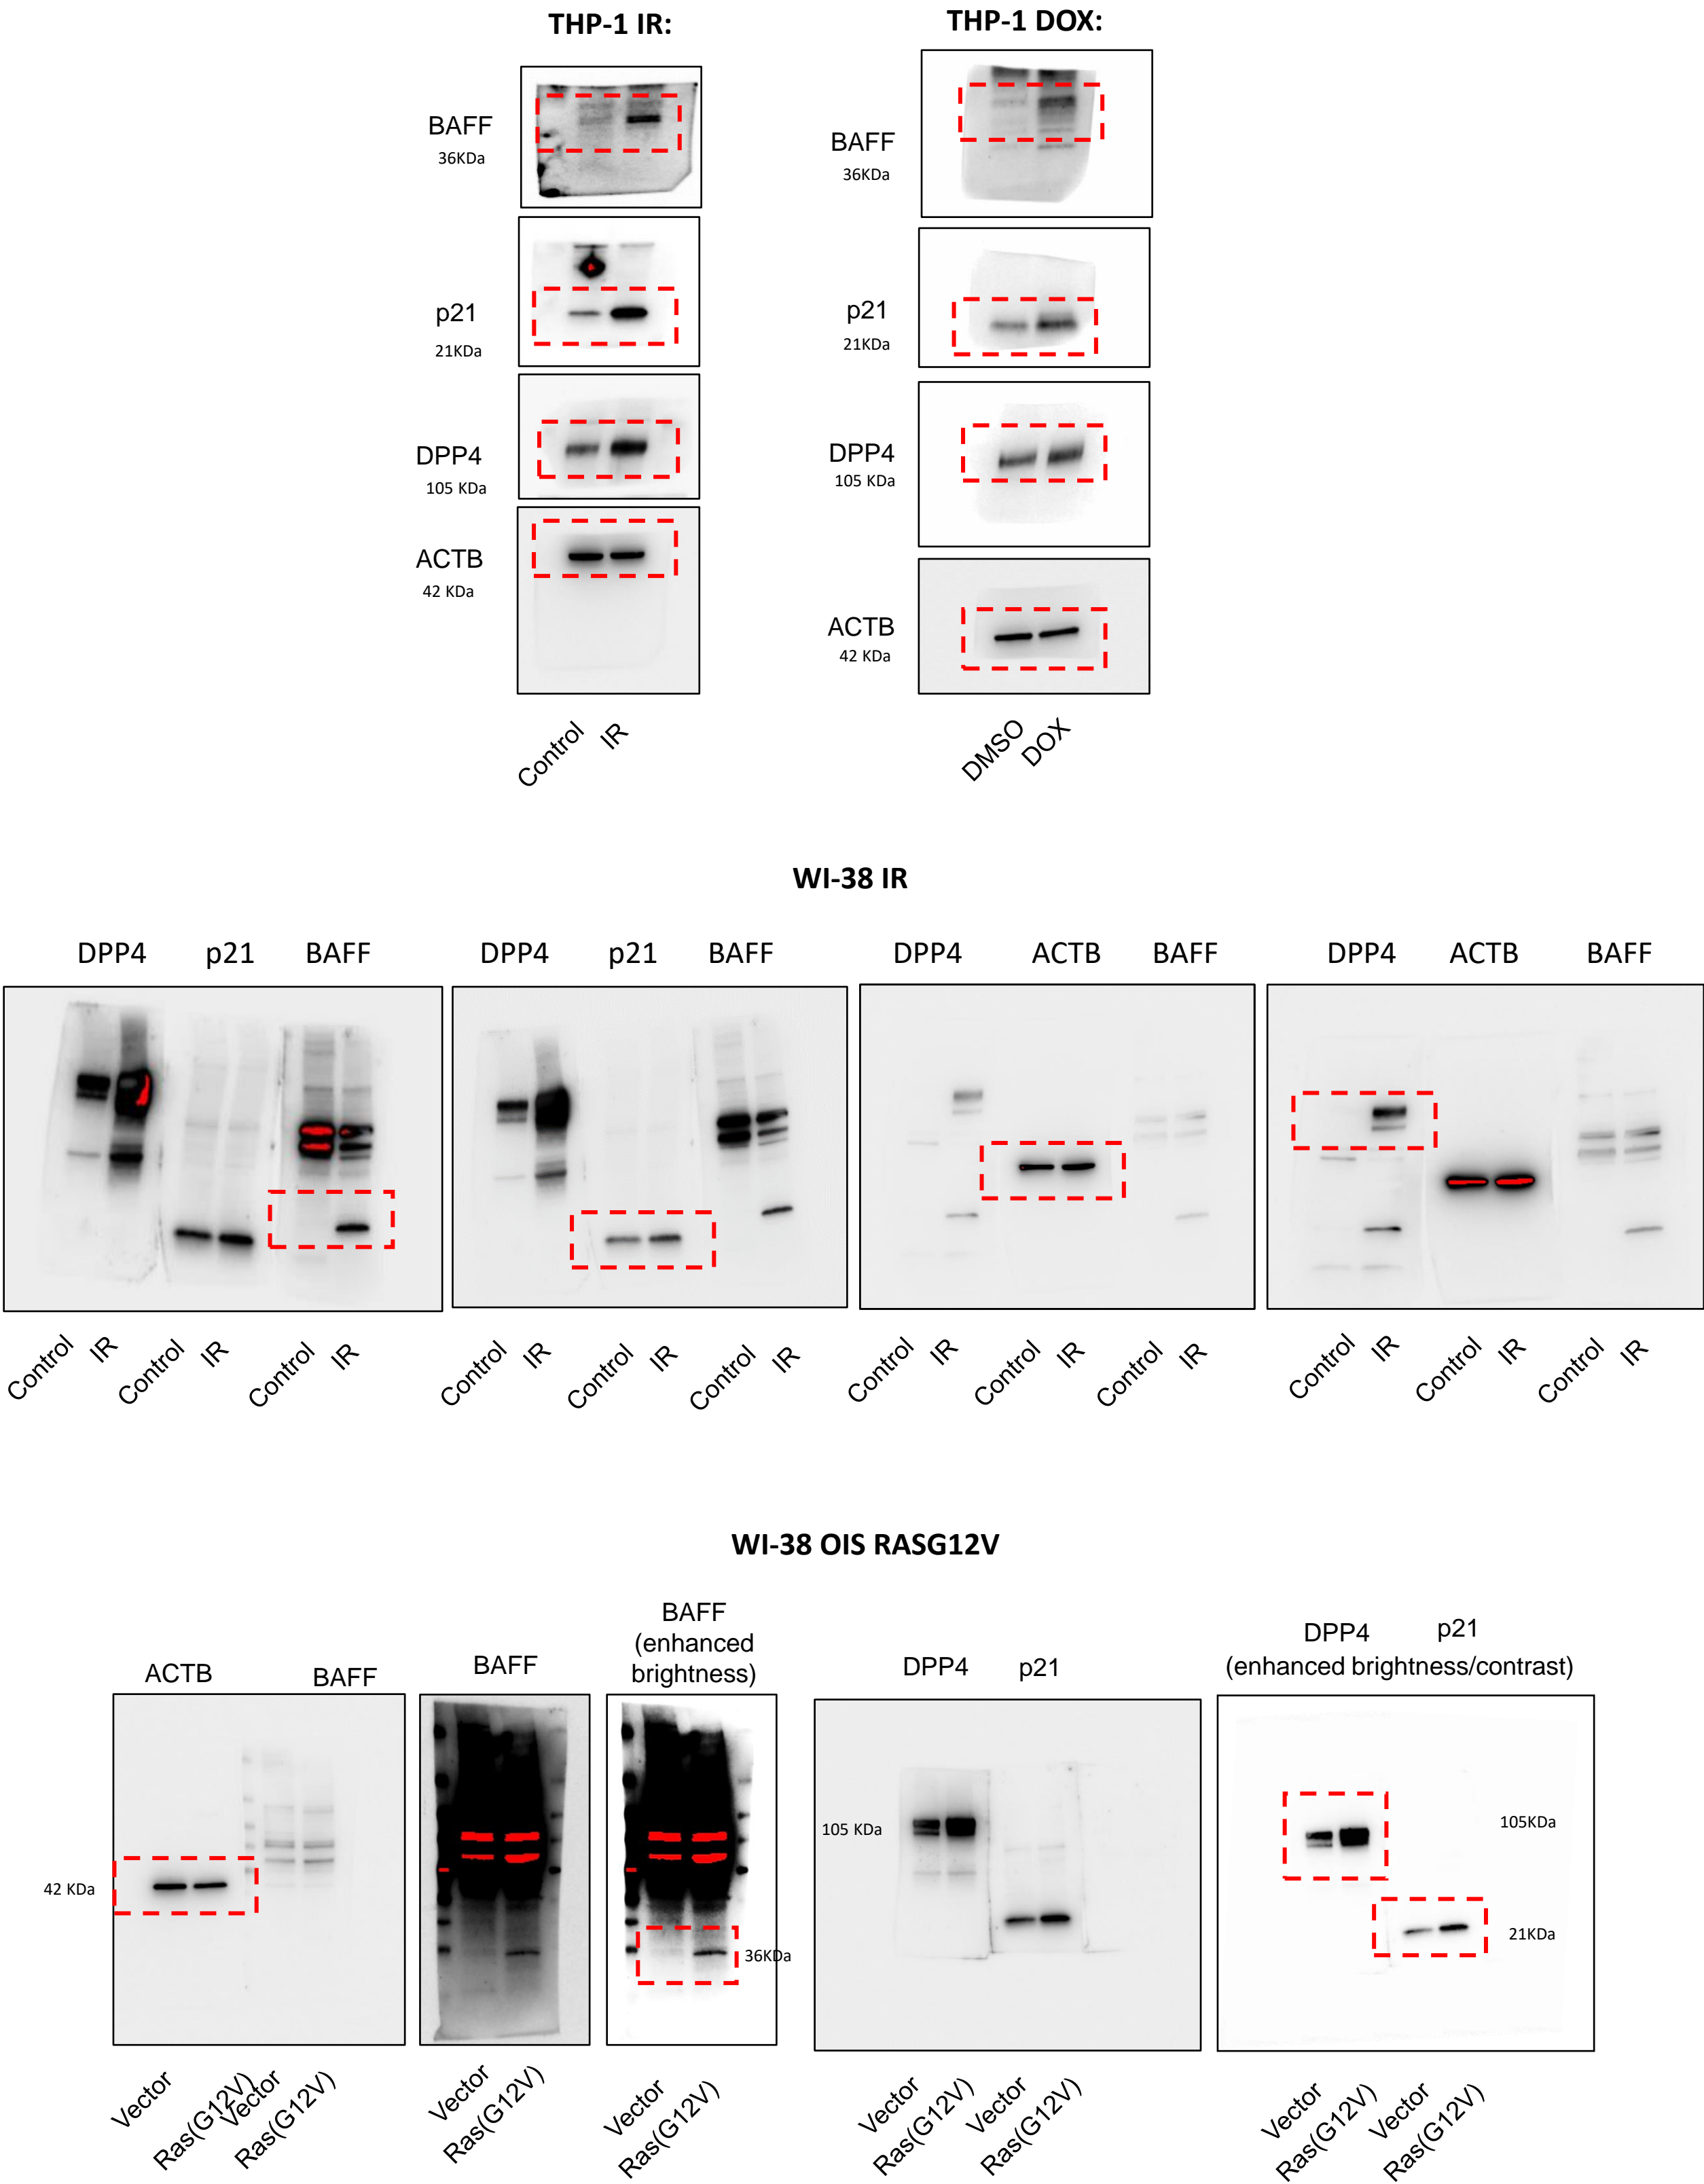

Spleen

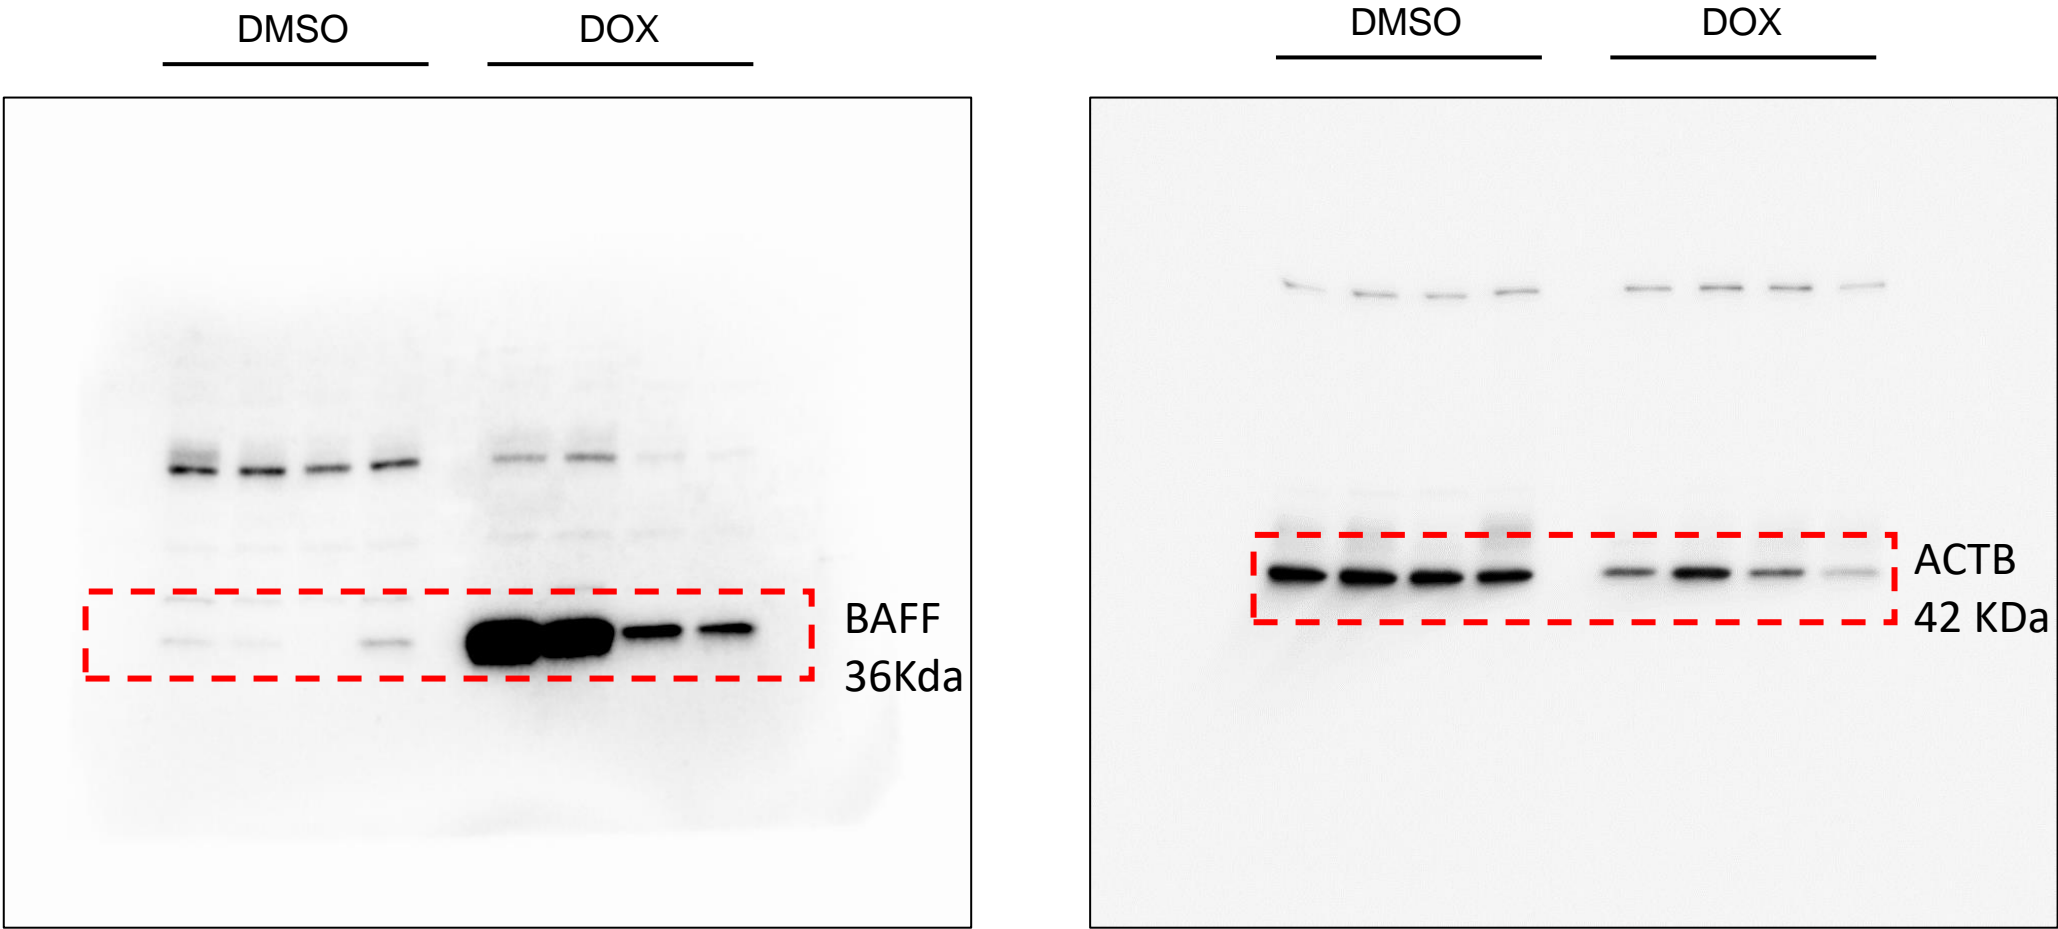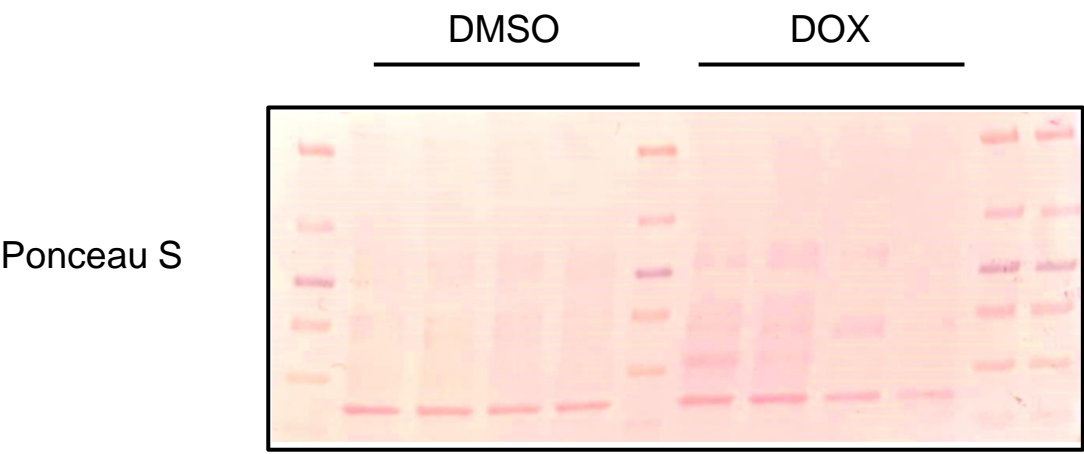

Supplement: fig1-data1 [file Figure1-uncropped blots labeled.pdf › z Figure 1-Source Data 1/Figure 1-Source Data 1/Figure1-uncropped blots labeled.pdf]

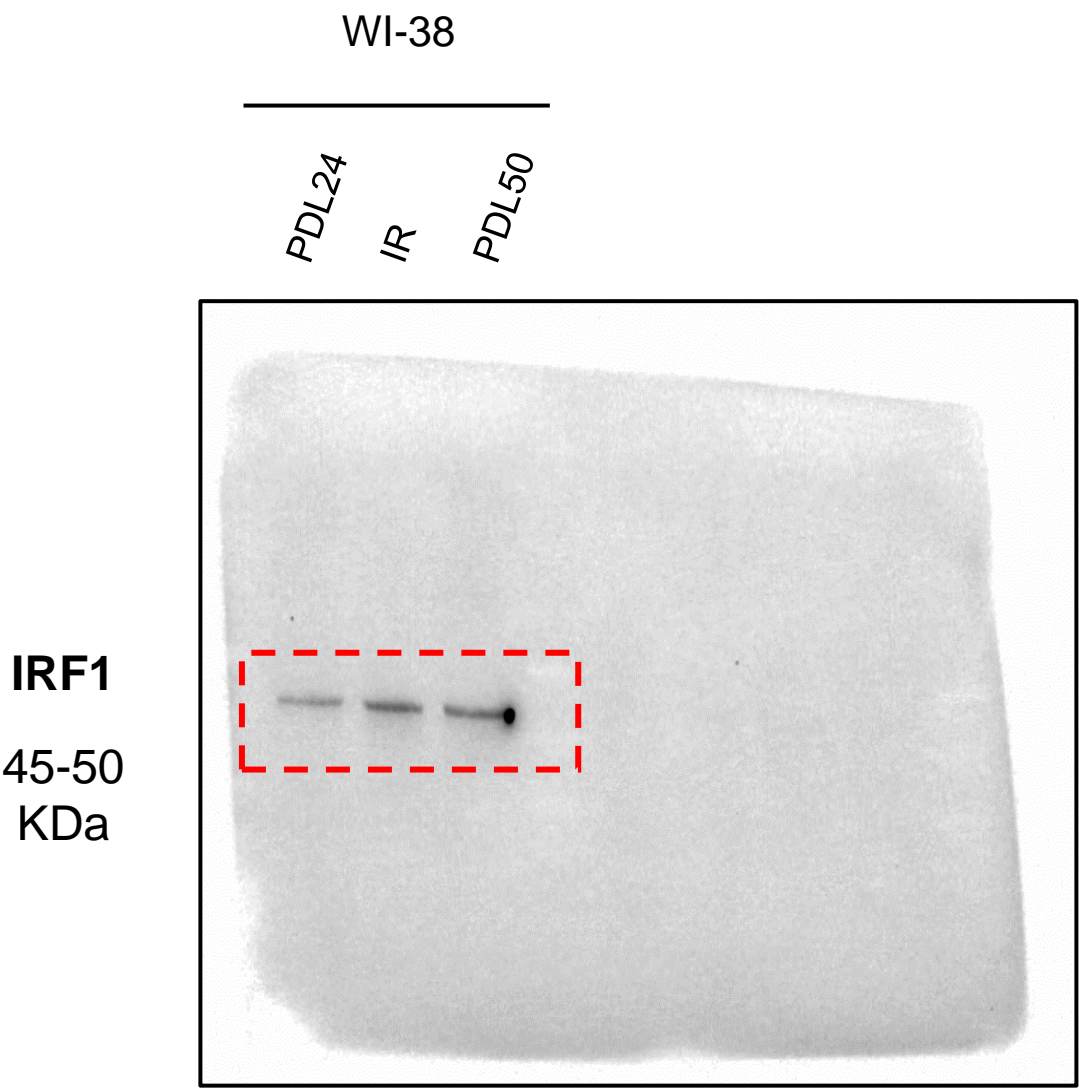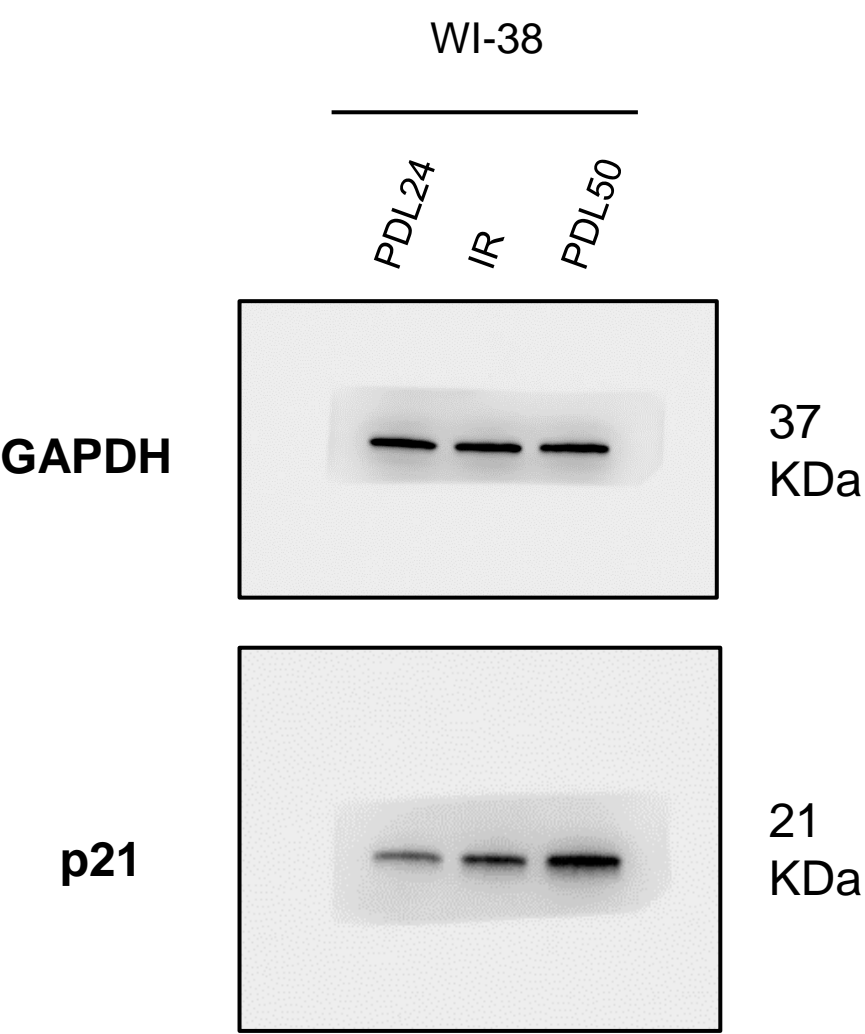

Supplement: fig2-figsupp1-data1 [file elife-84238-fig2-figsupp1-data1-v1.zip]

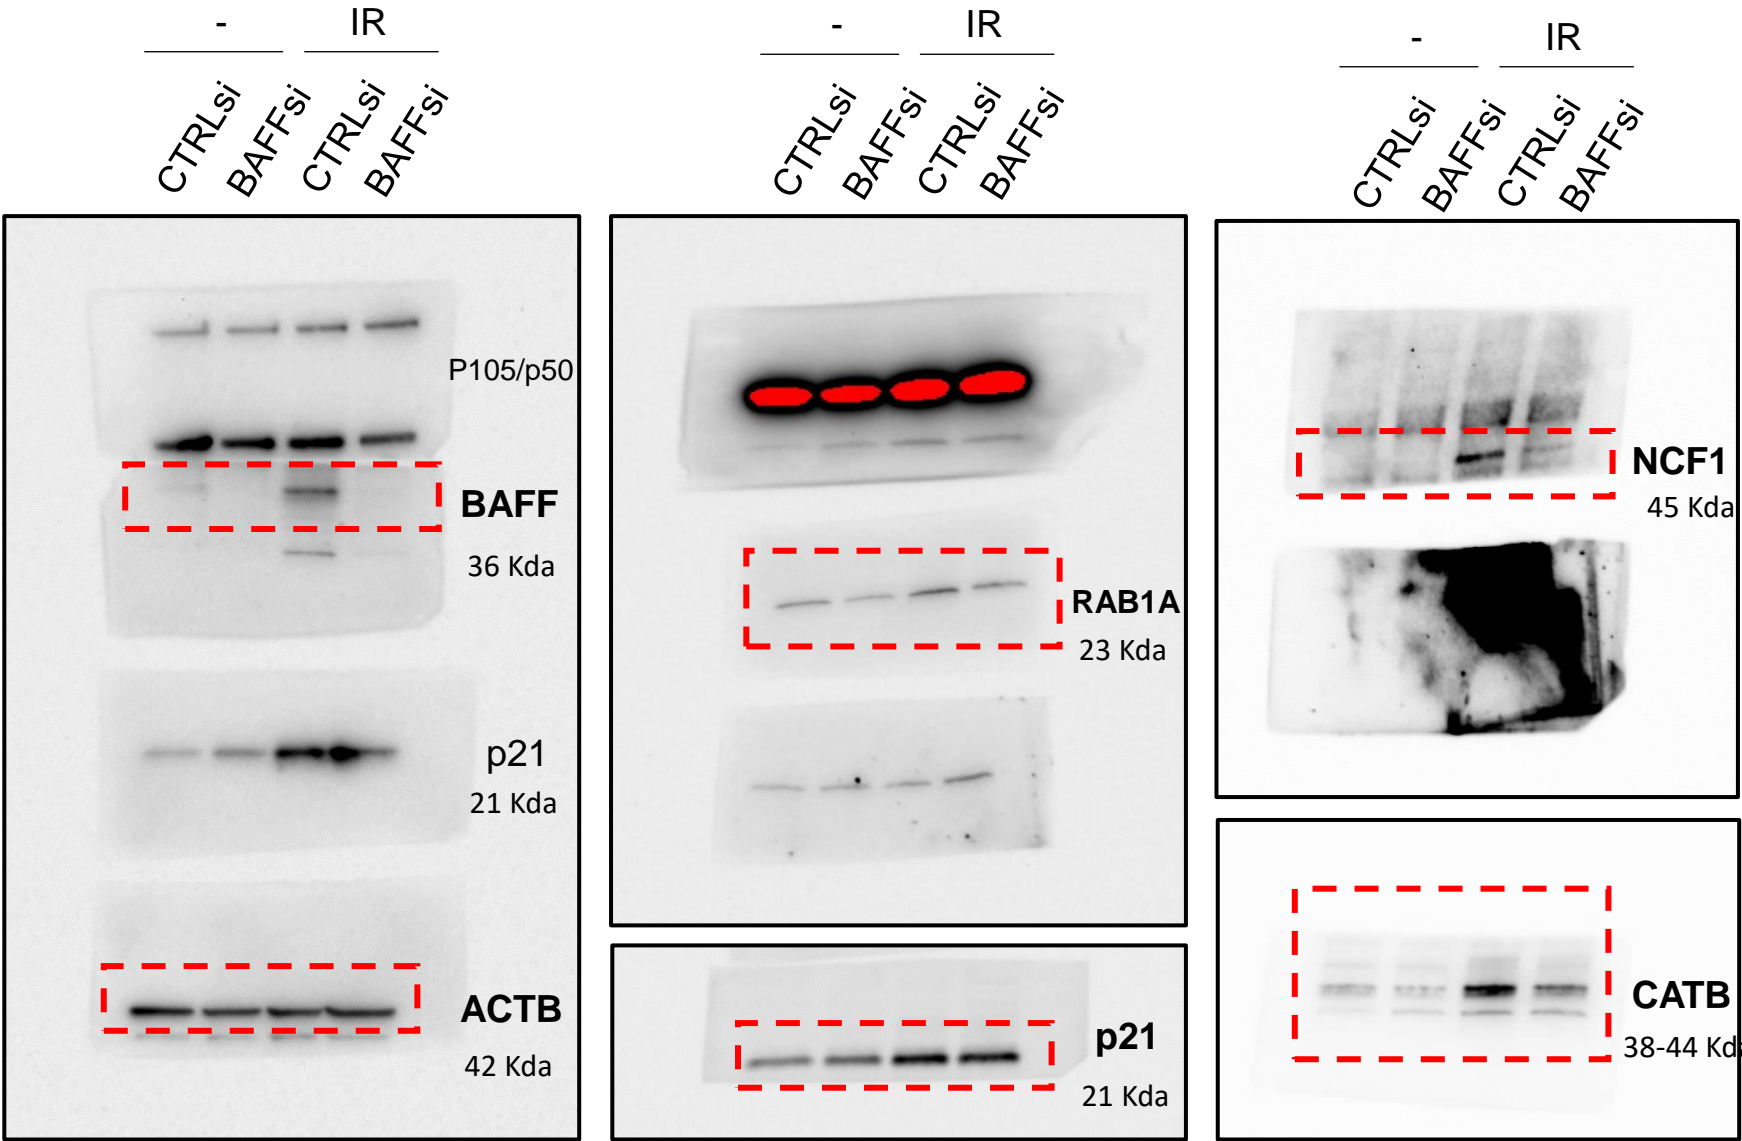

Supplement: fig3-data3 [file elife-84238-fig3-data3-v1.zip]

uncropped blots relative to Fig. 4D

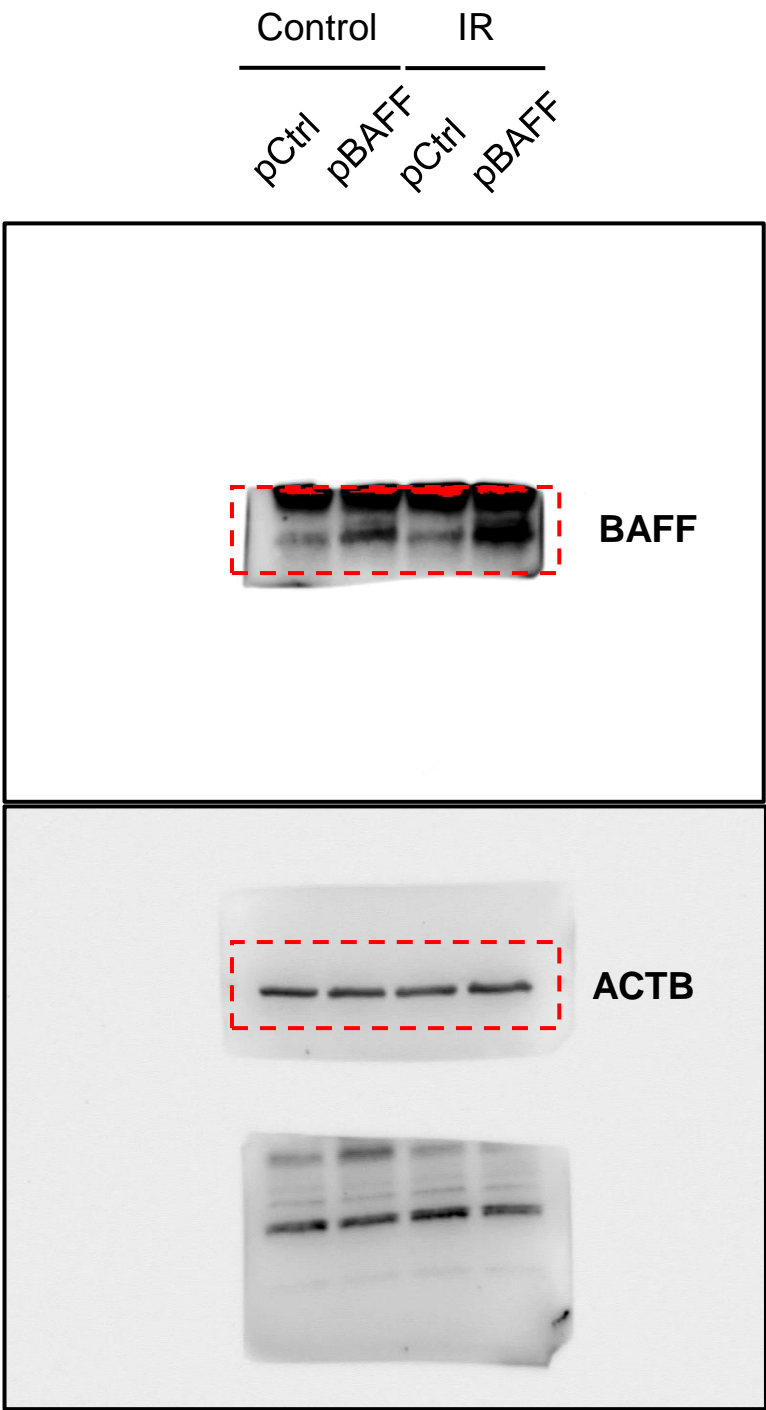

uncropped blots relative to Fig. 4F

Cytokine array in BAFF OE

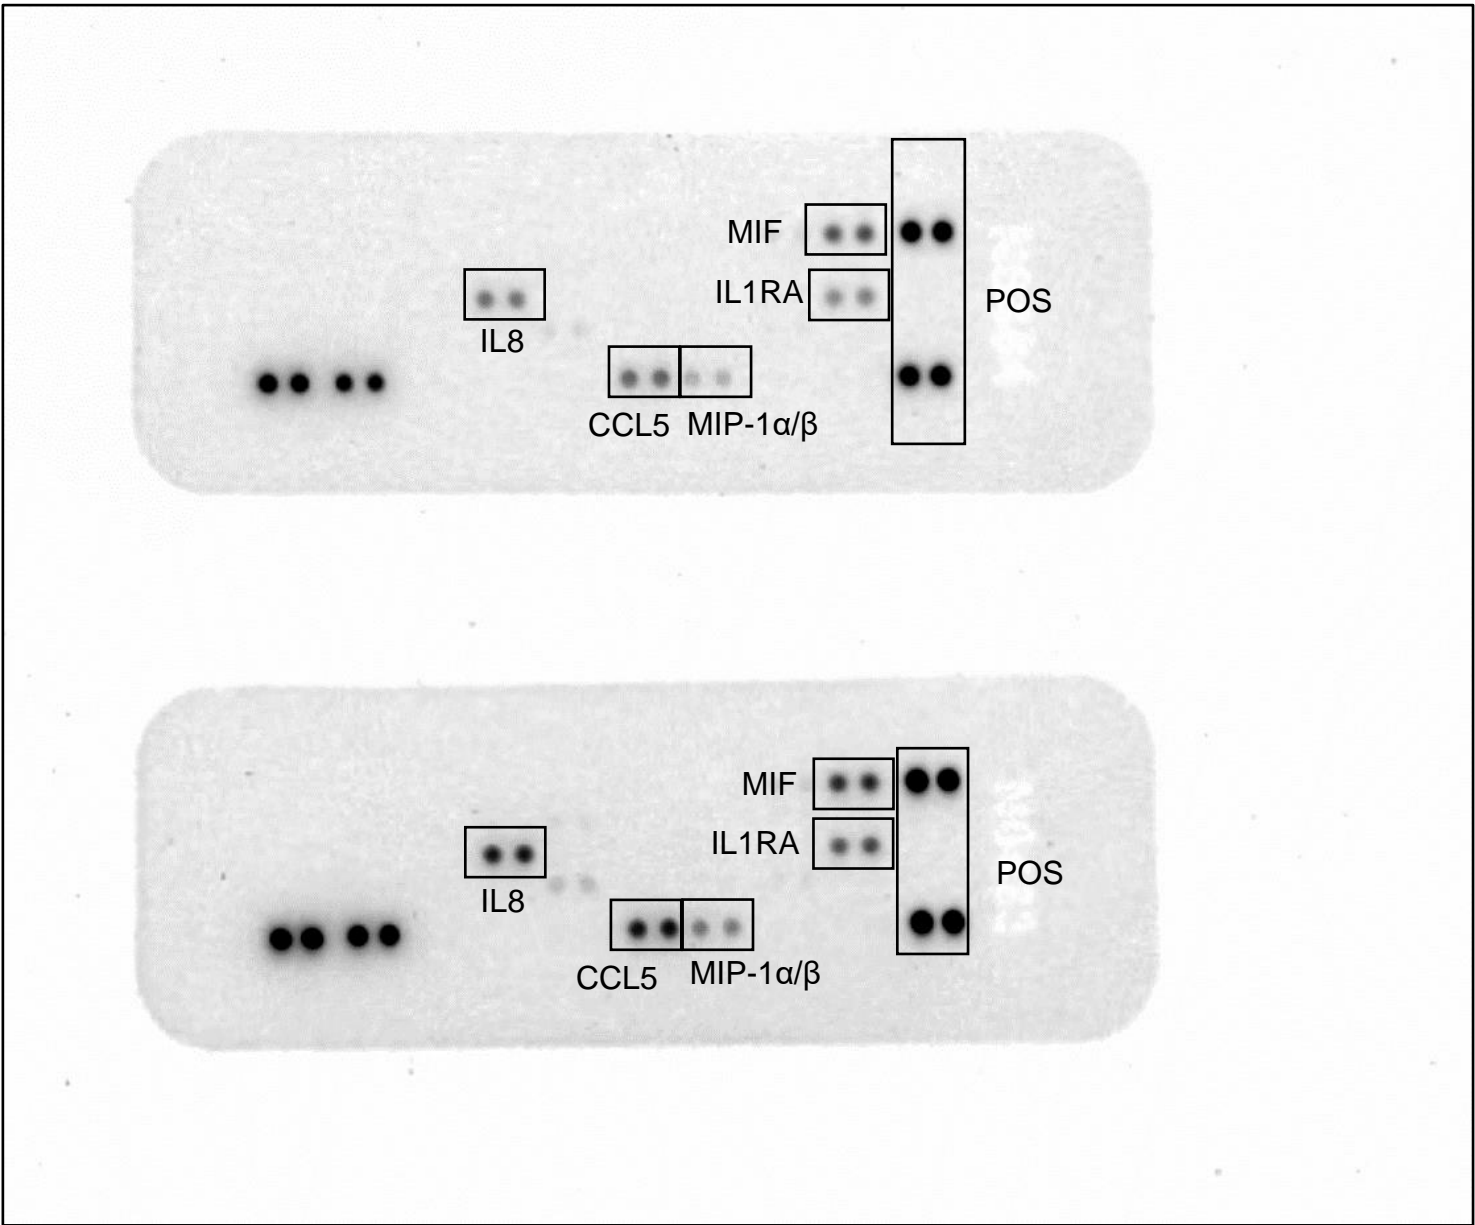

Supplement: fig4-data1 [file Figure 4 uncropped blots labeled.pdf › z Figure 4- Source Data 1/Figure 4- Source Data 1/Figure 4 uncropped blots labeled.pdf]

(High exposure)

Cytokine array in BAFFsi

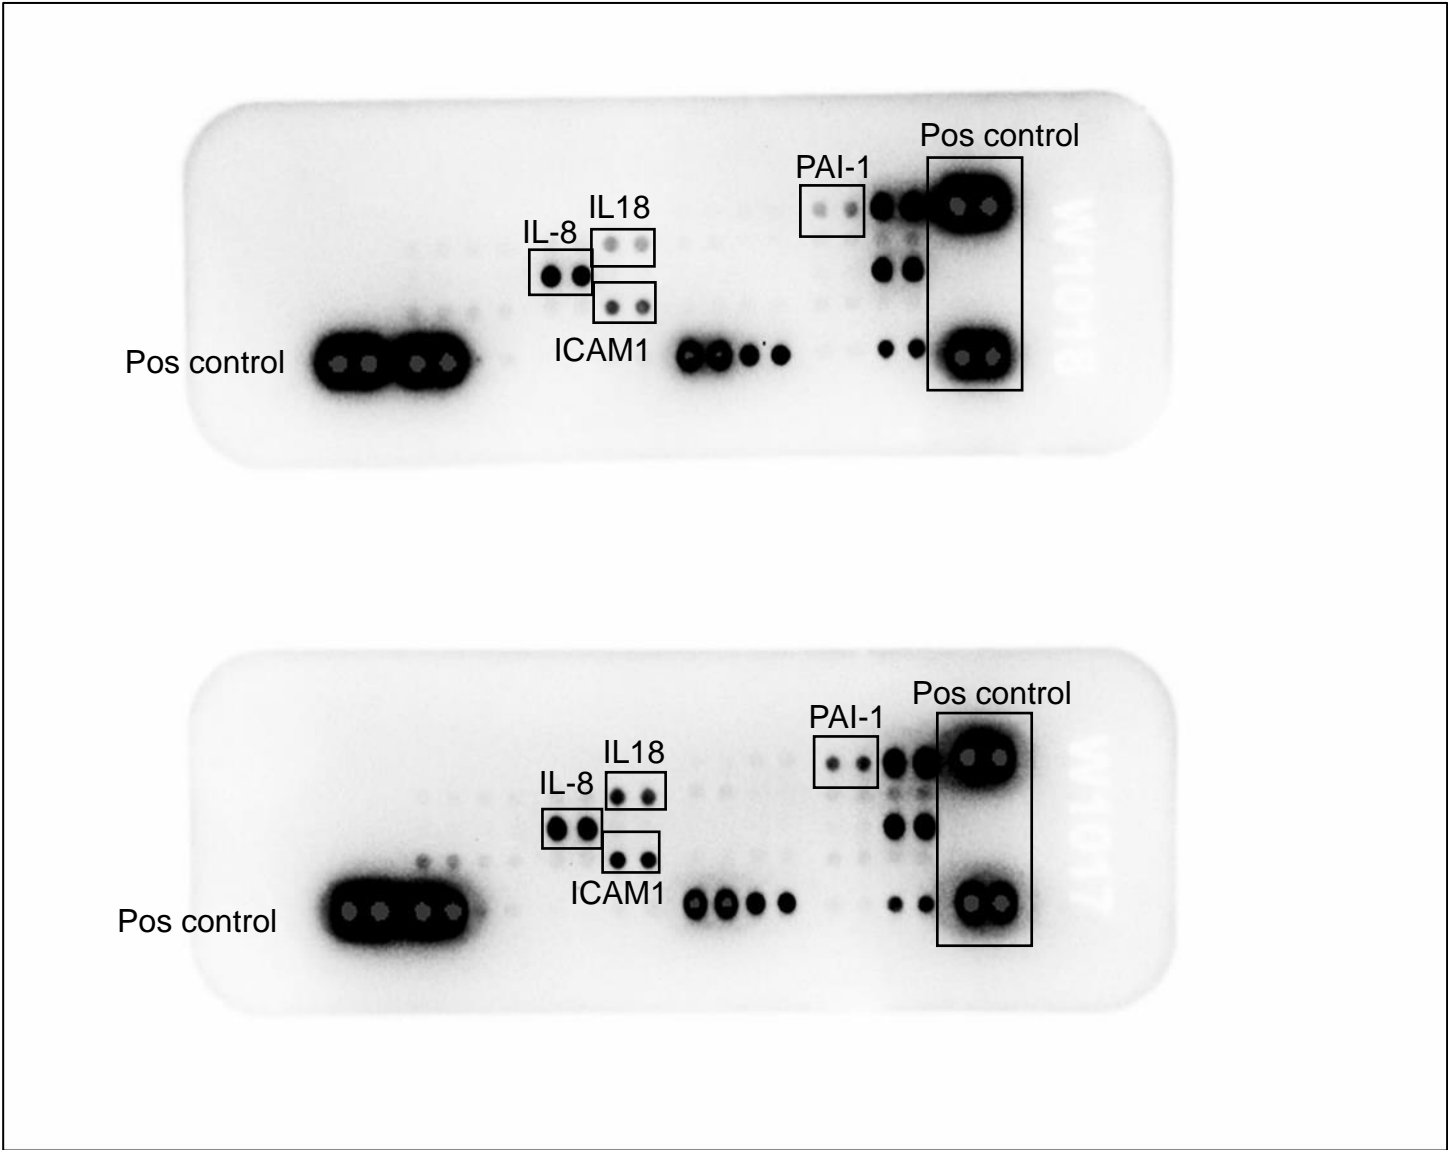

(Low exposure)

Cytokine array in BAFFsi

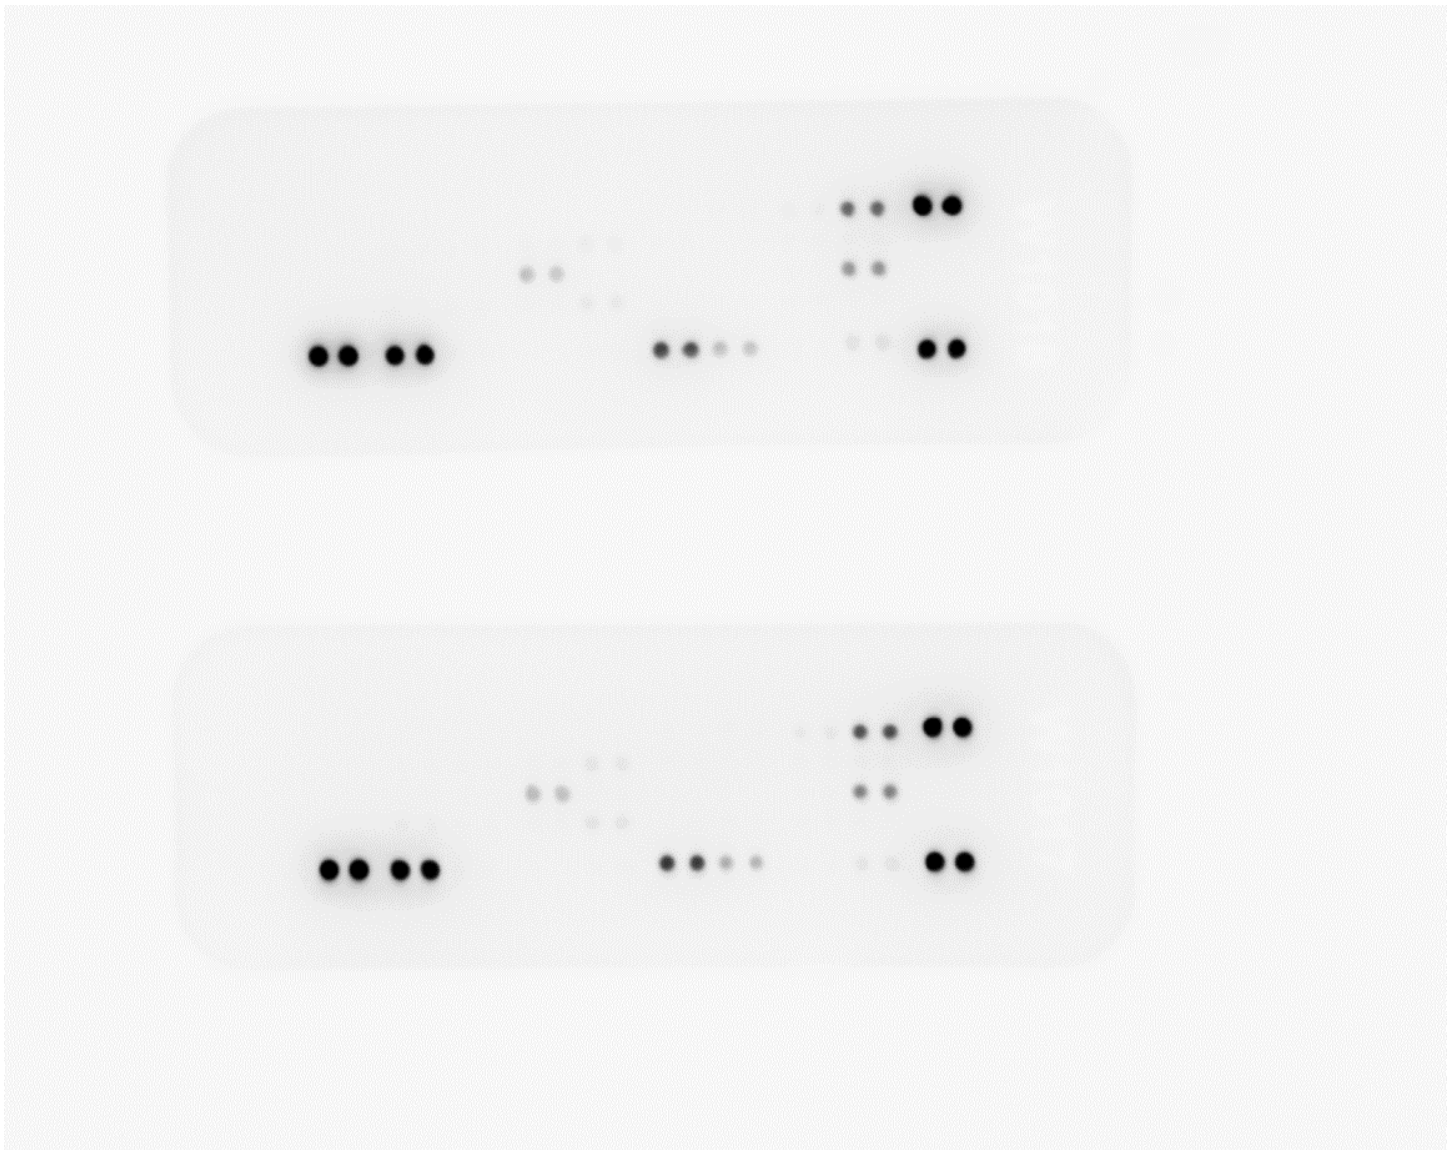

Supplement: fig4-figsupp1-data1 [file elife-84238-fig4-figsupp1-data1-v1.zip]

Figure 5A

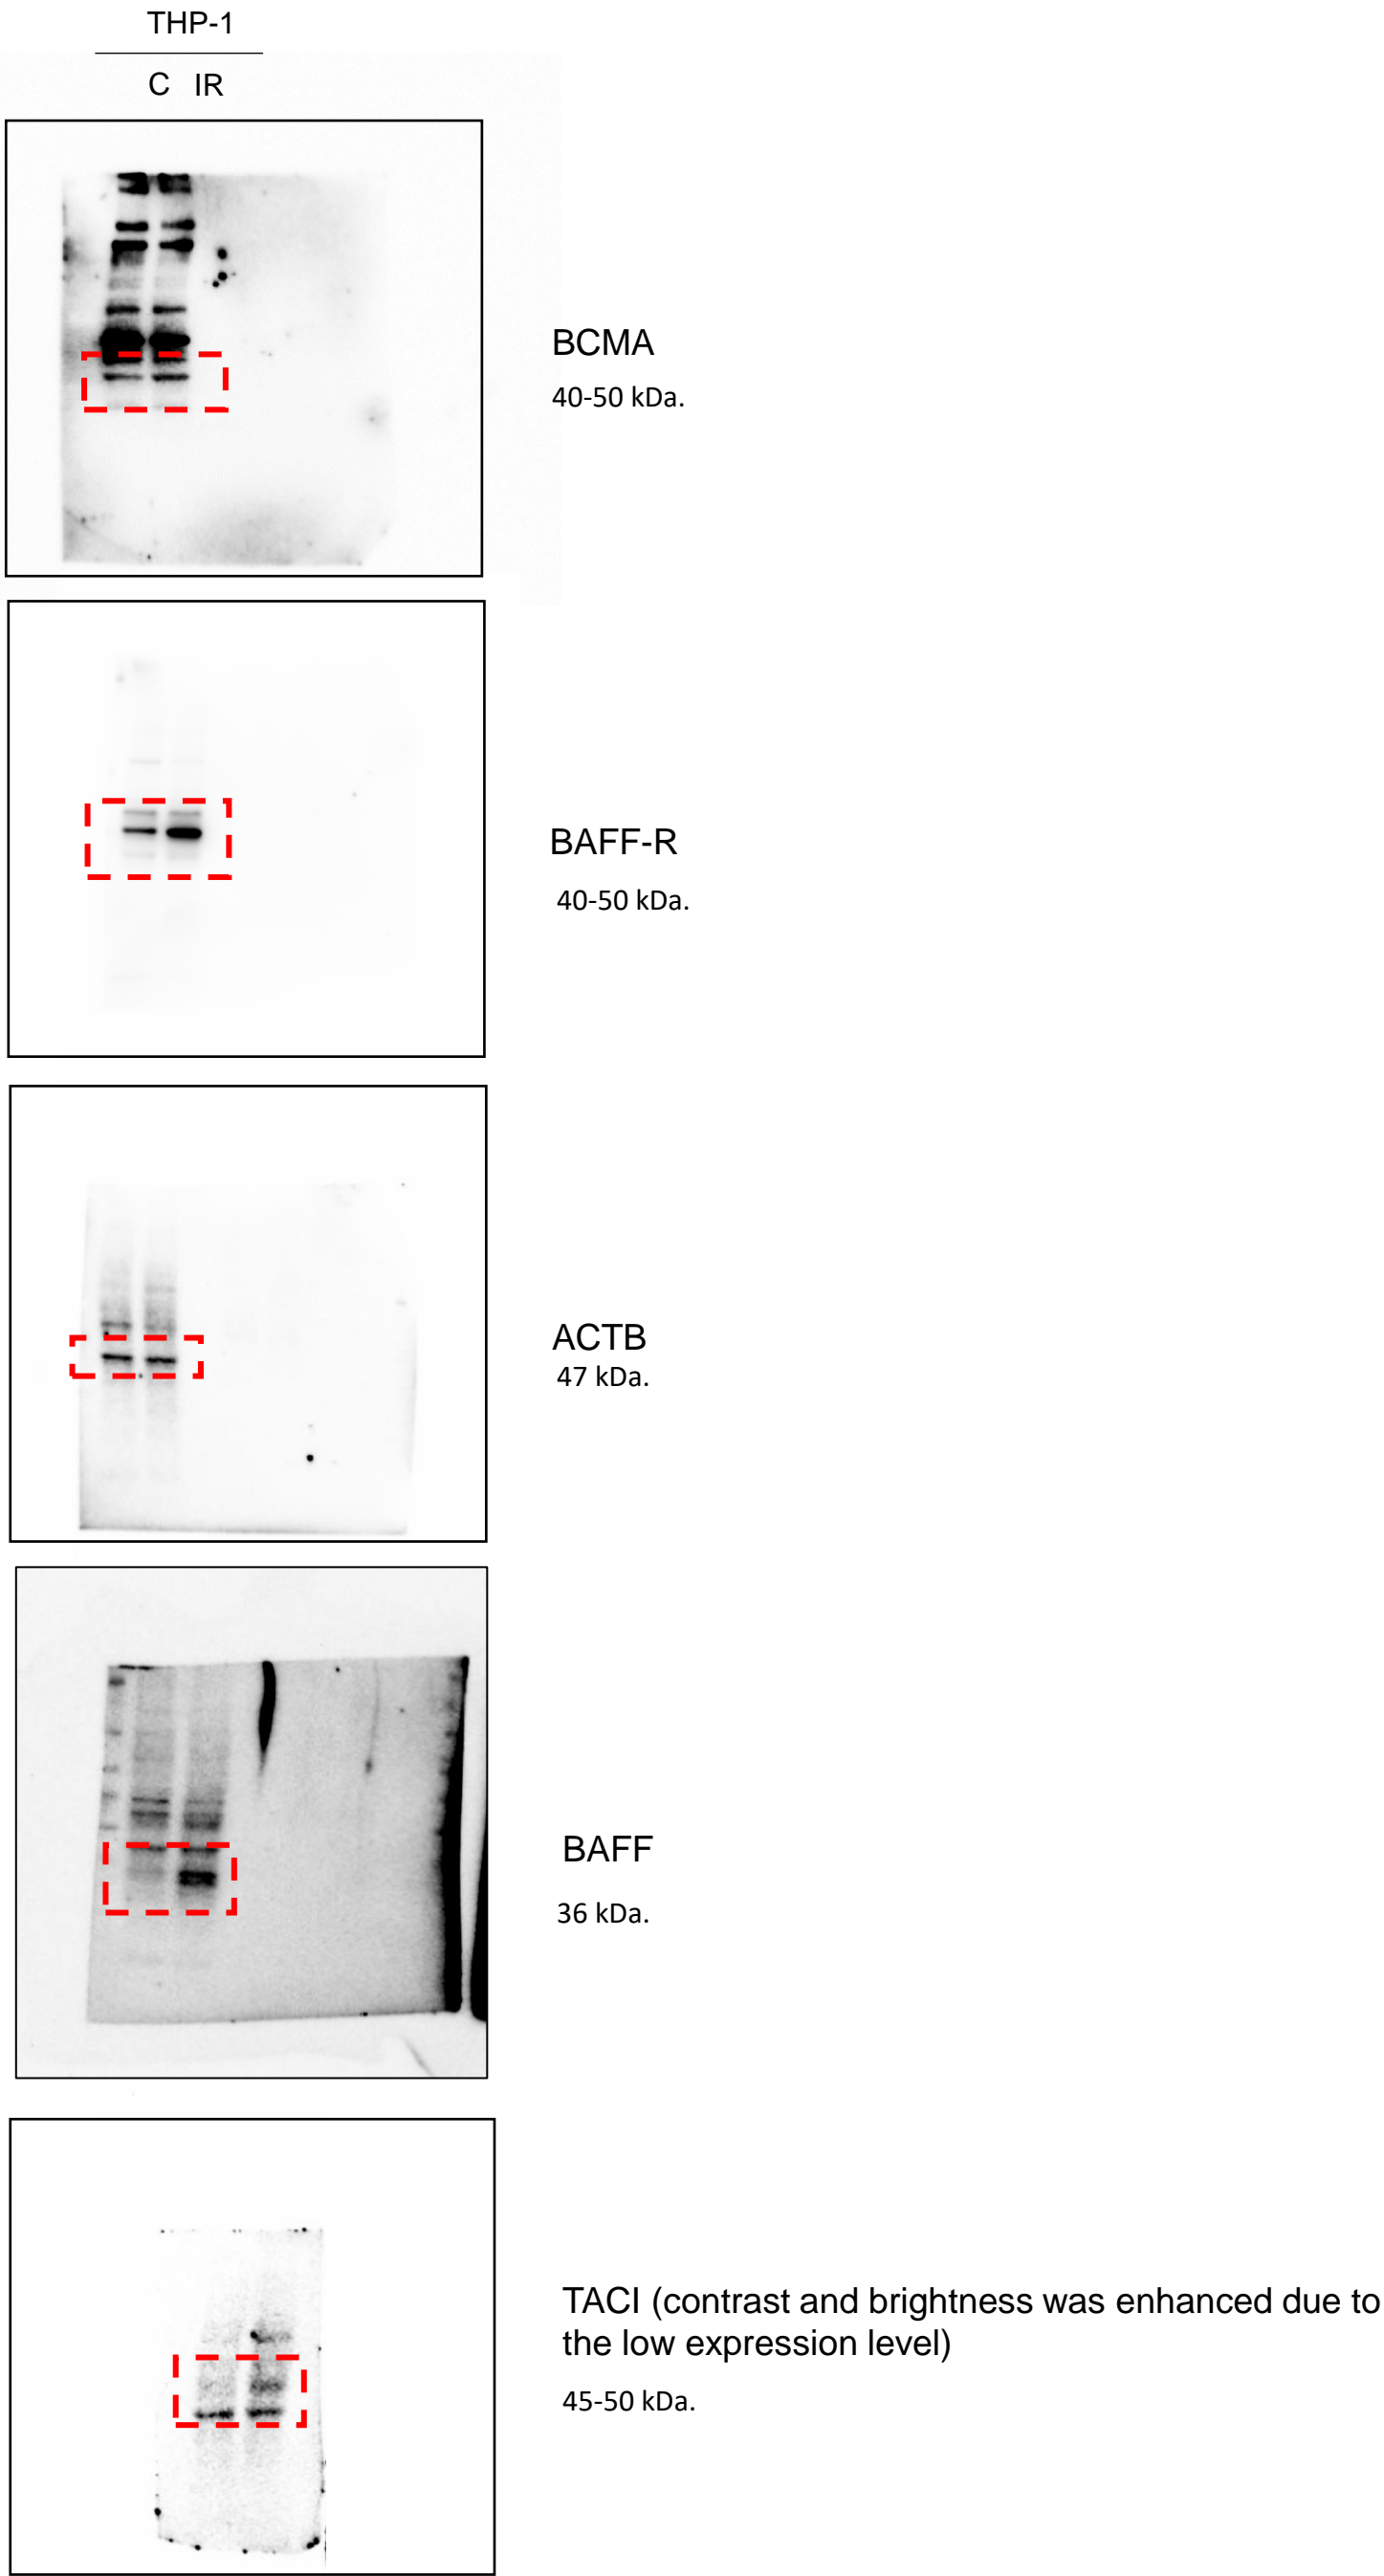

Figure 5F

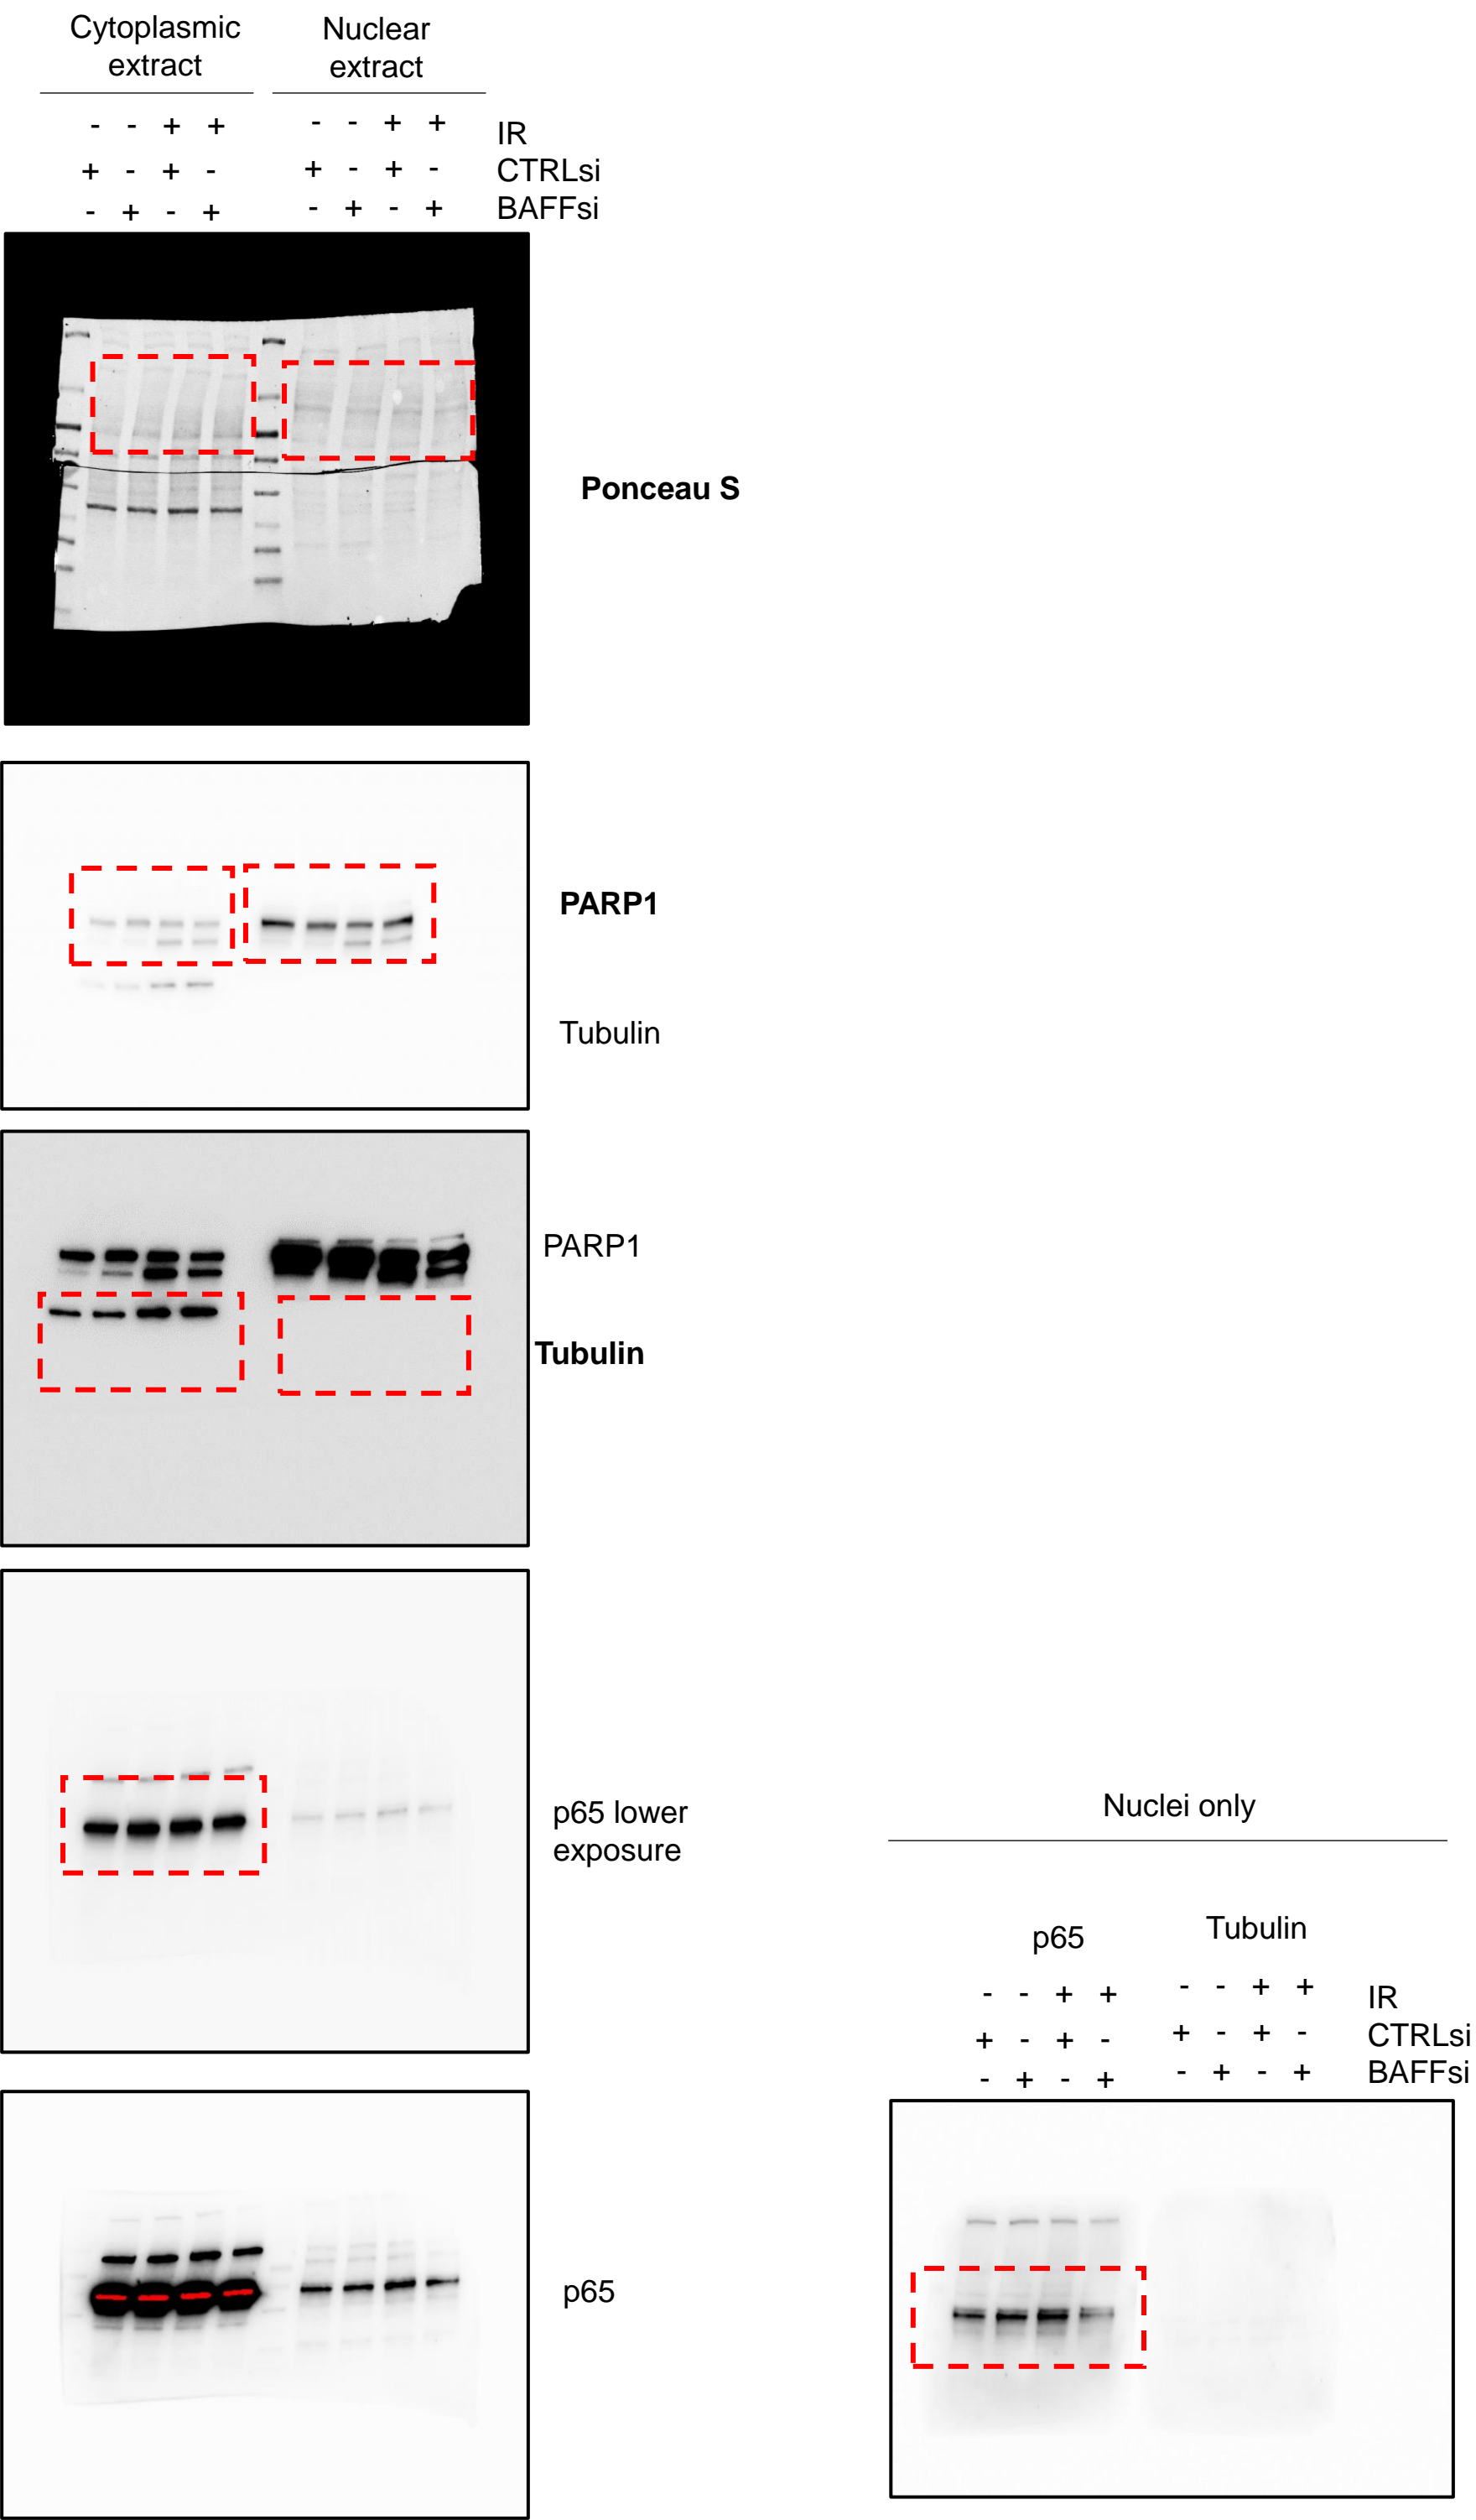

Figure 5G

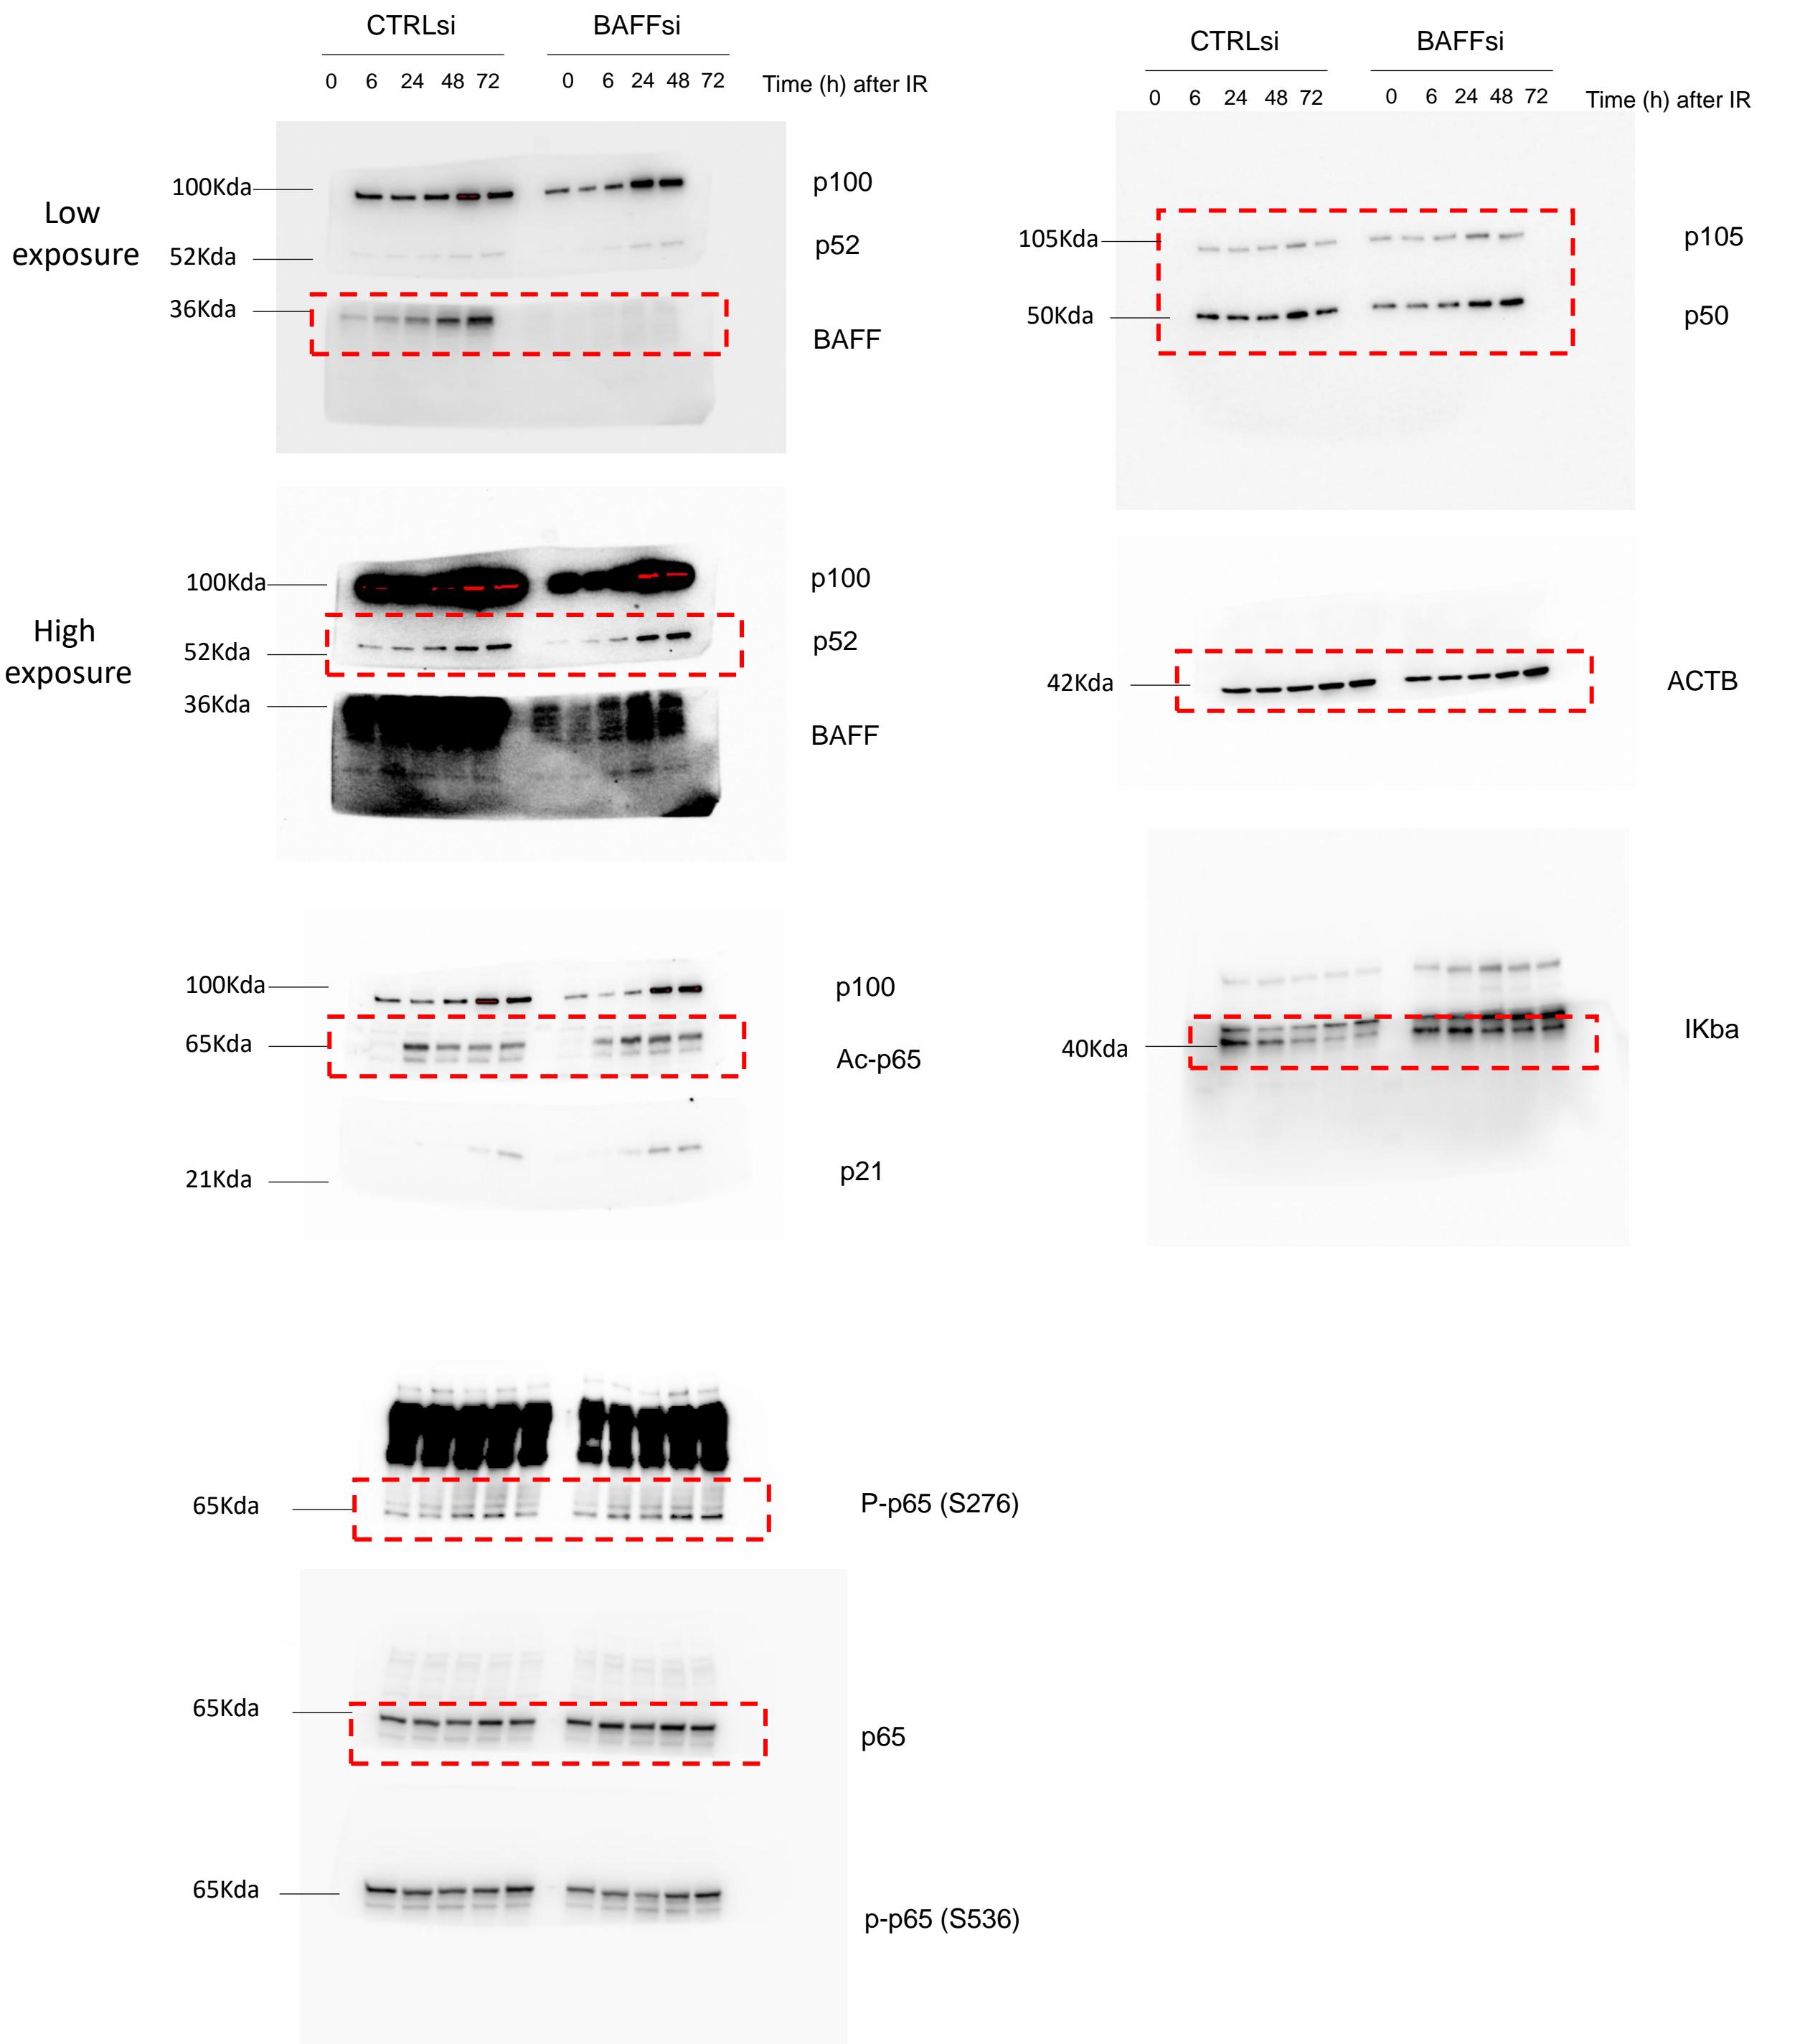

Supplement: fig5-data1 [file Figure 5 uncropped blots.pdf › z Figure 5-Source Data 1/Figure 5-Source Data 1/Figure 5 uncropped blots.pdf]

S5A

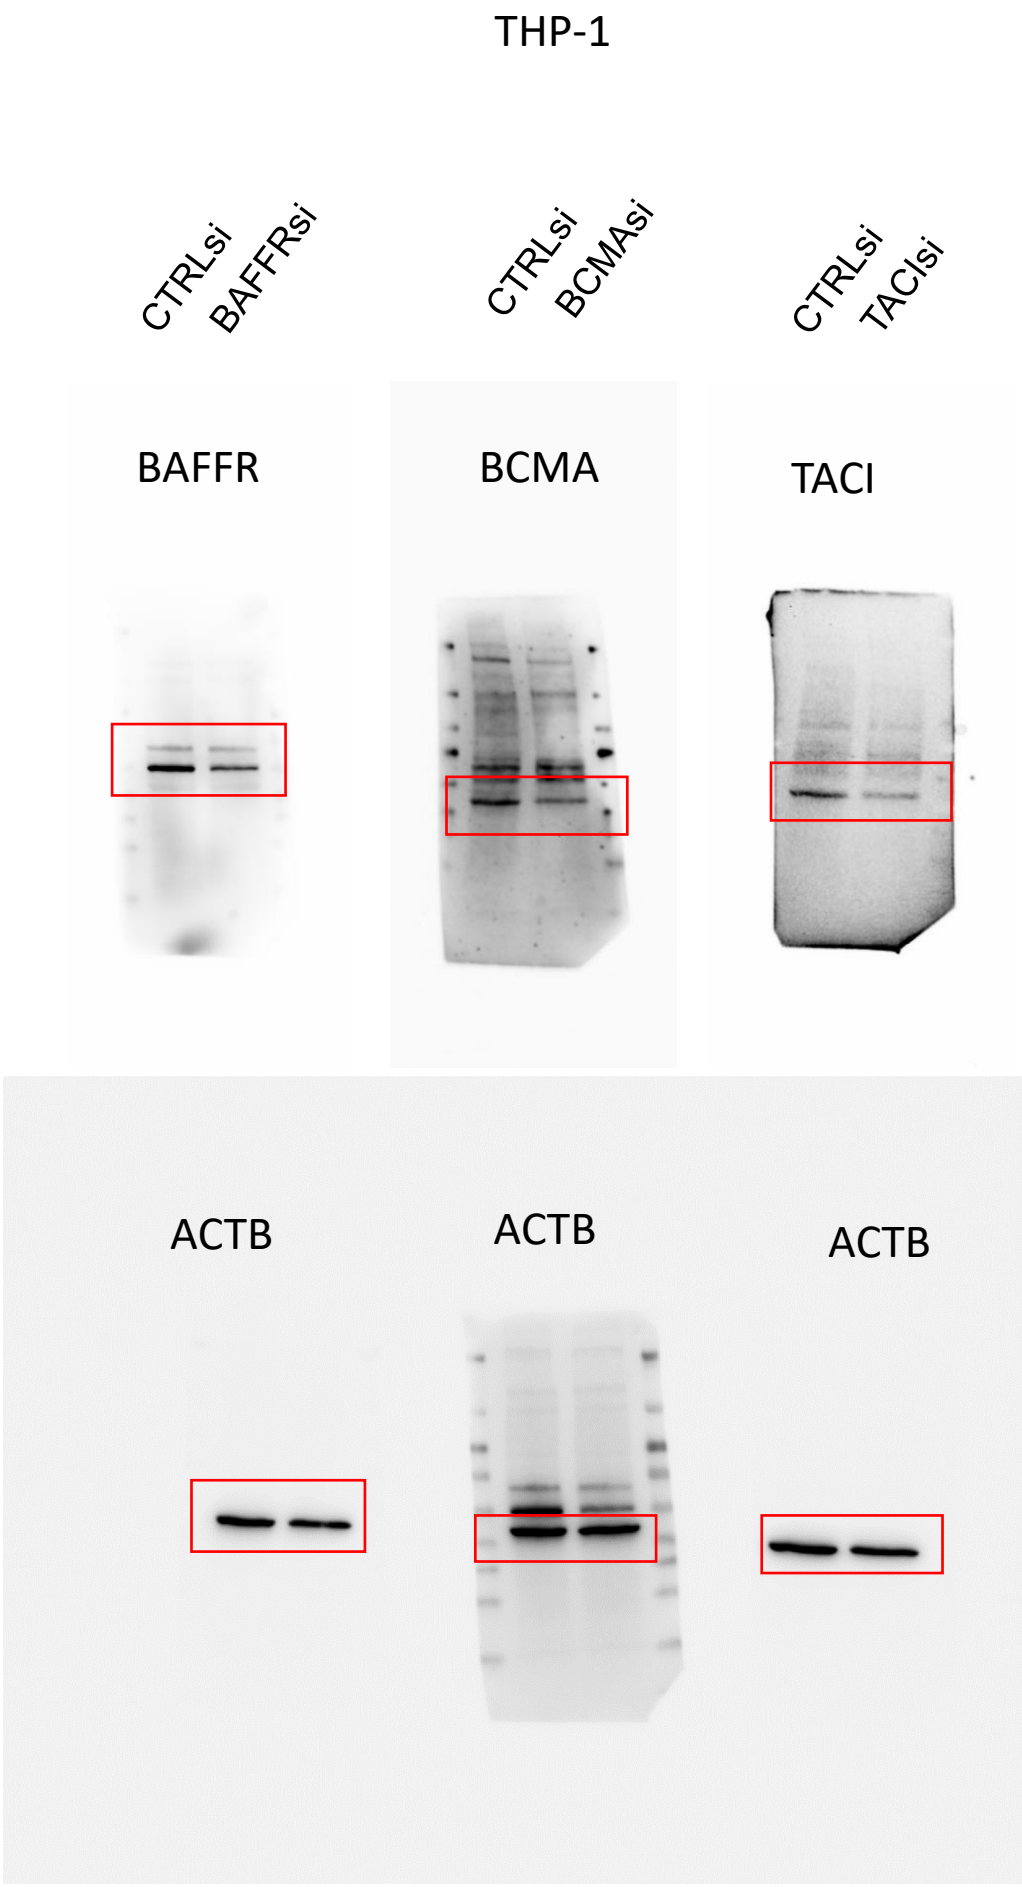

Replicate 1

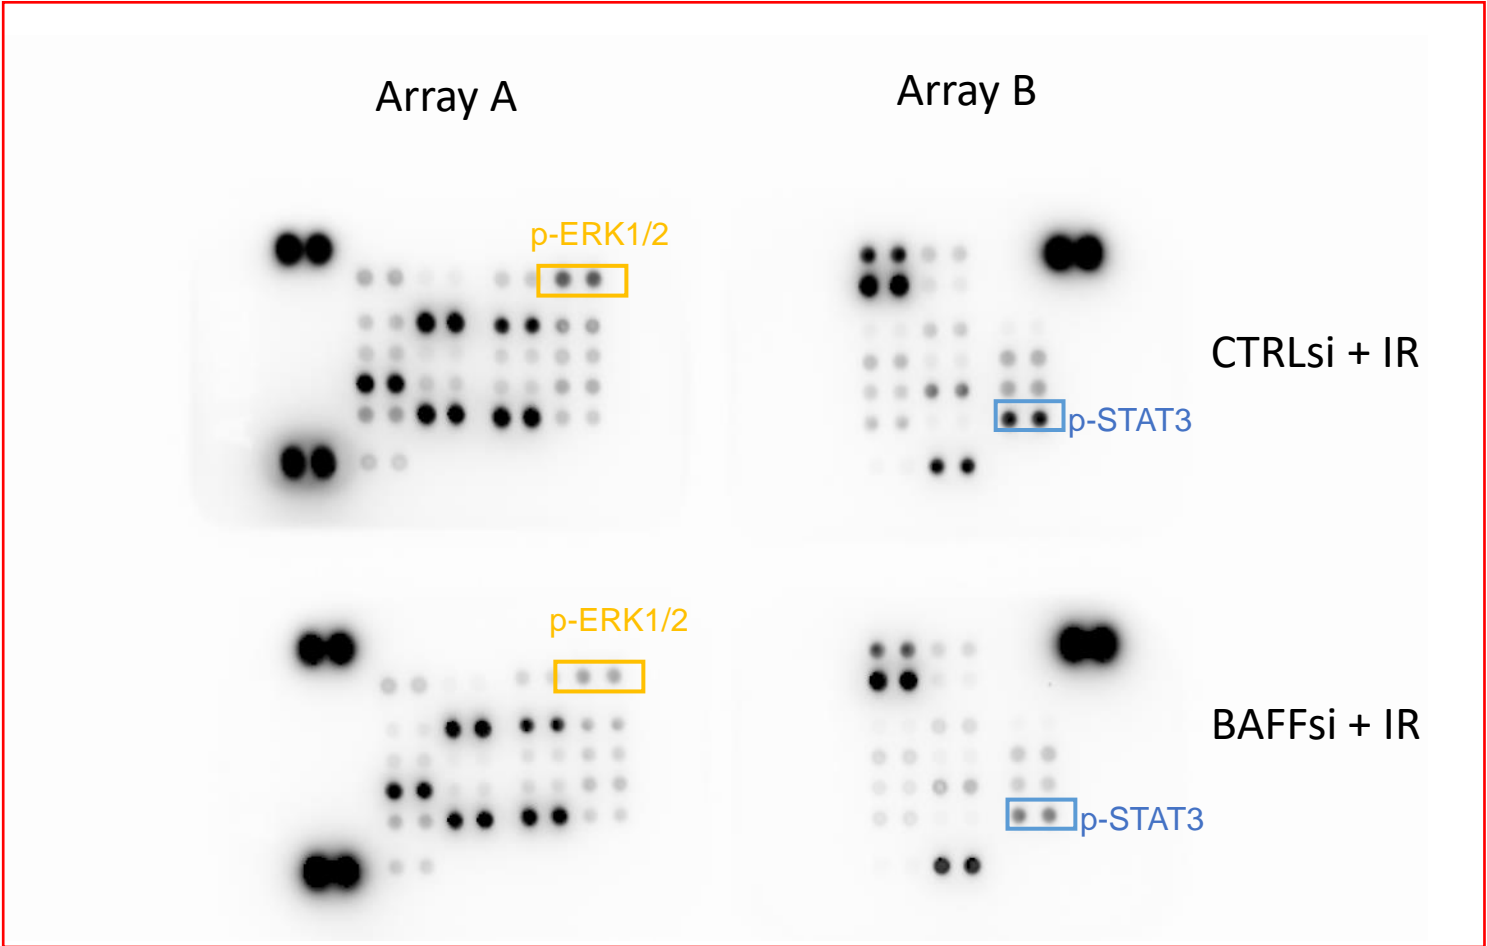

Replicate 2

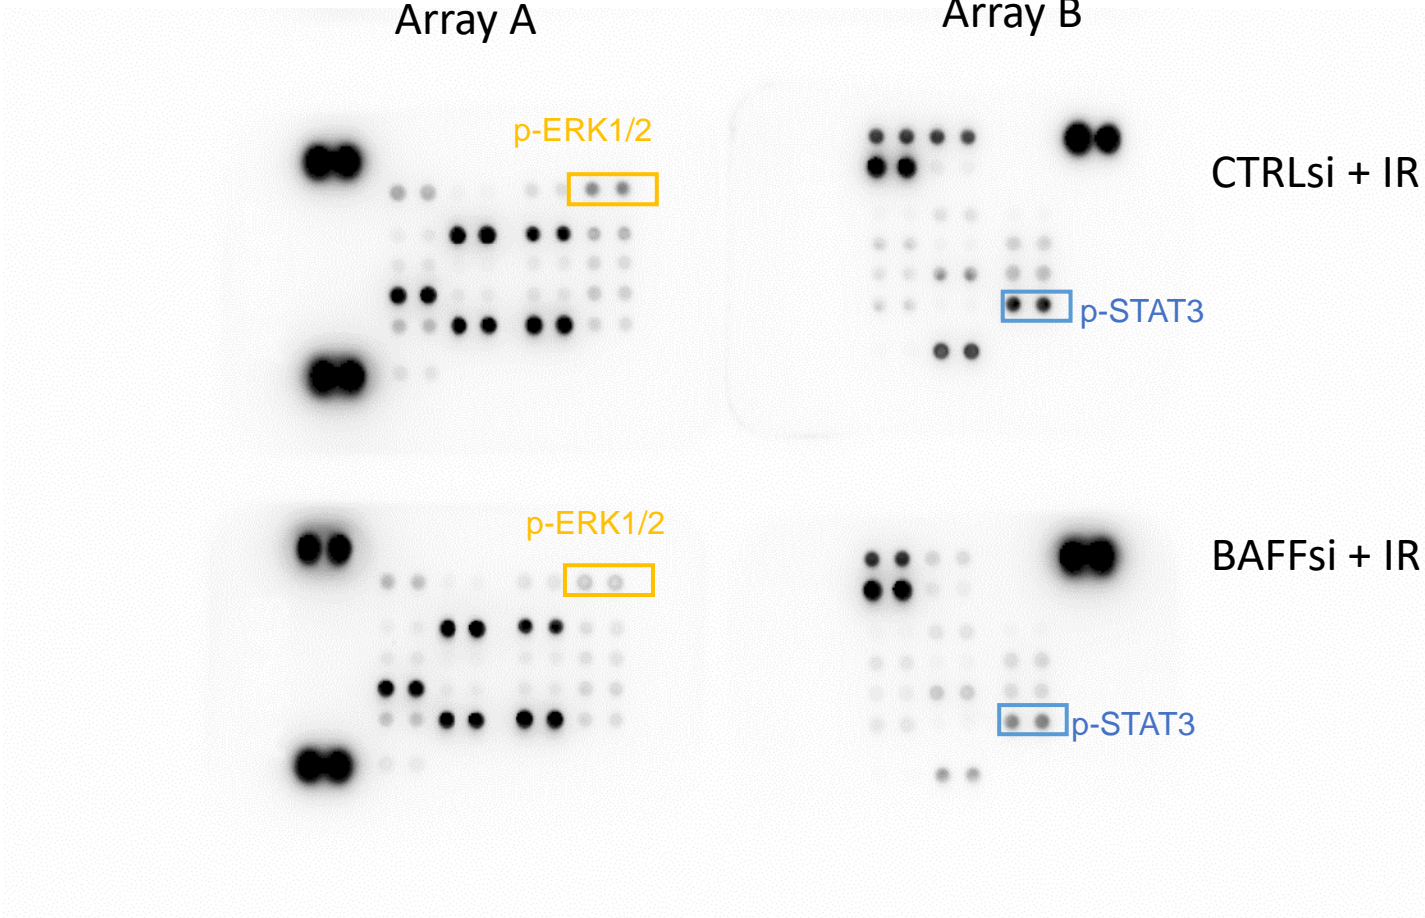

Replicate 3

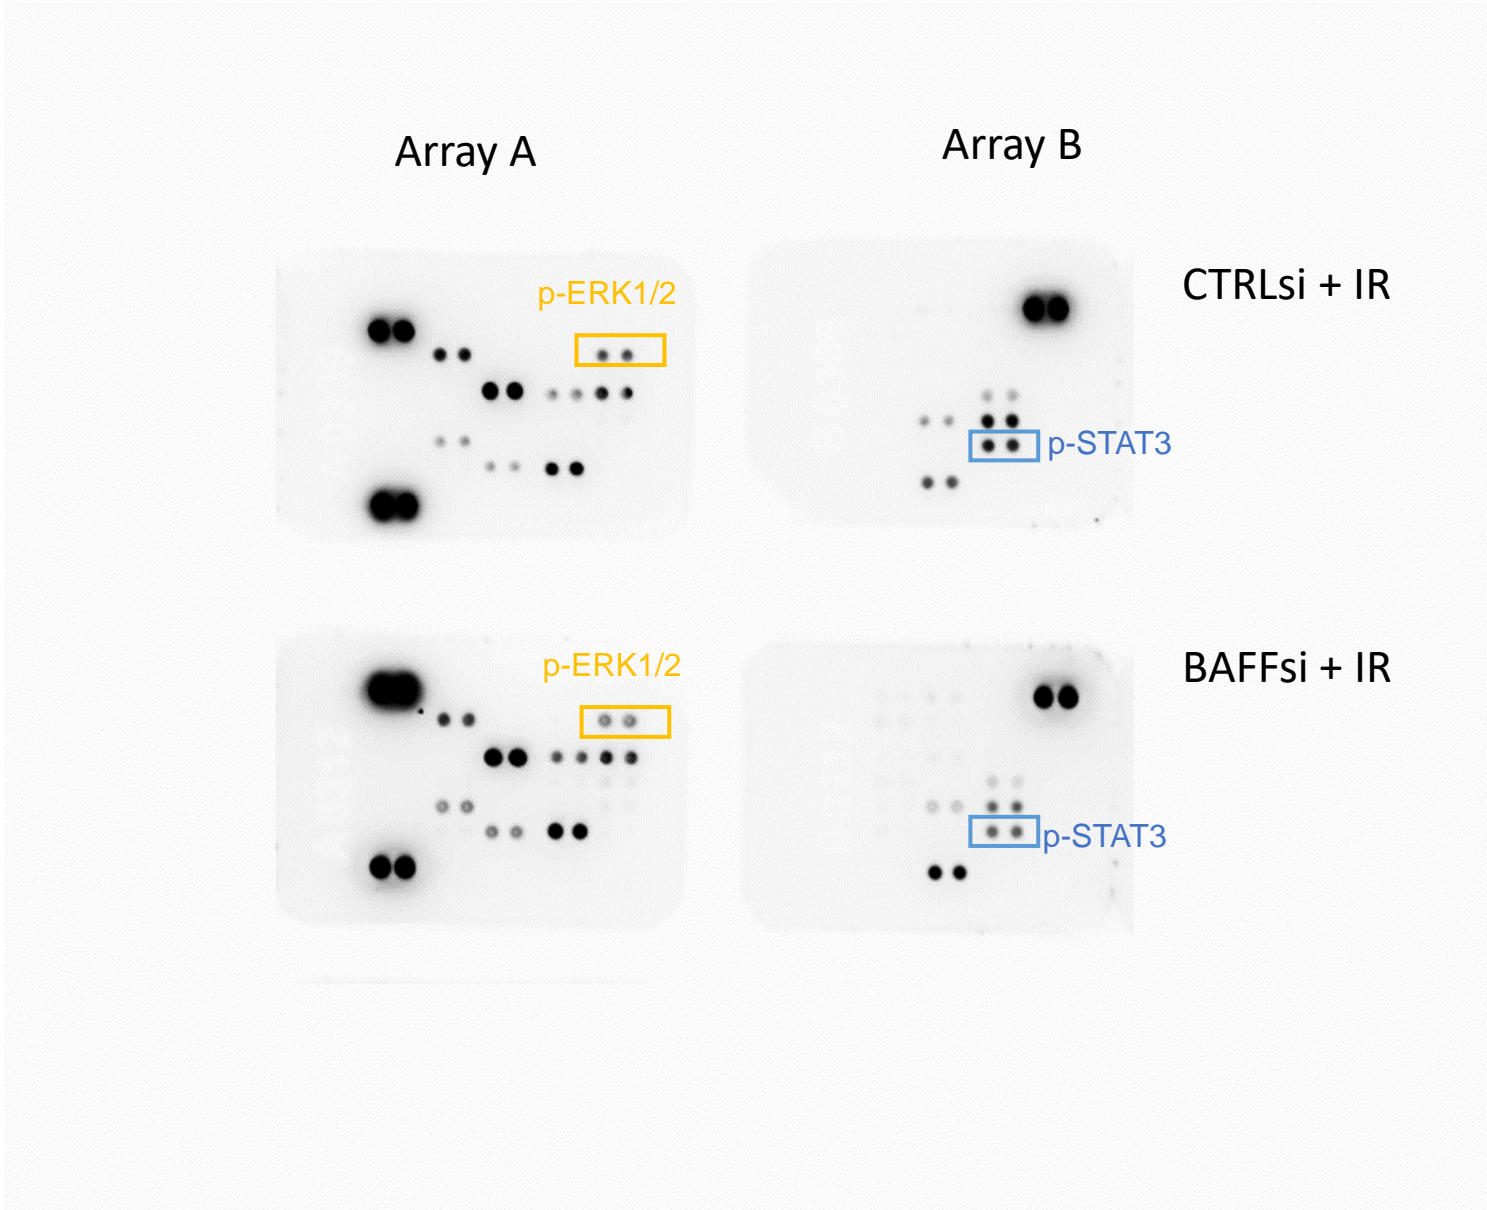

Supplement: fig5-figsupp1-data1 [file elife-84238-fig5-figsupp1-data1-v1.zip]

Figure 6-Figure Supplement 1

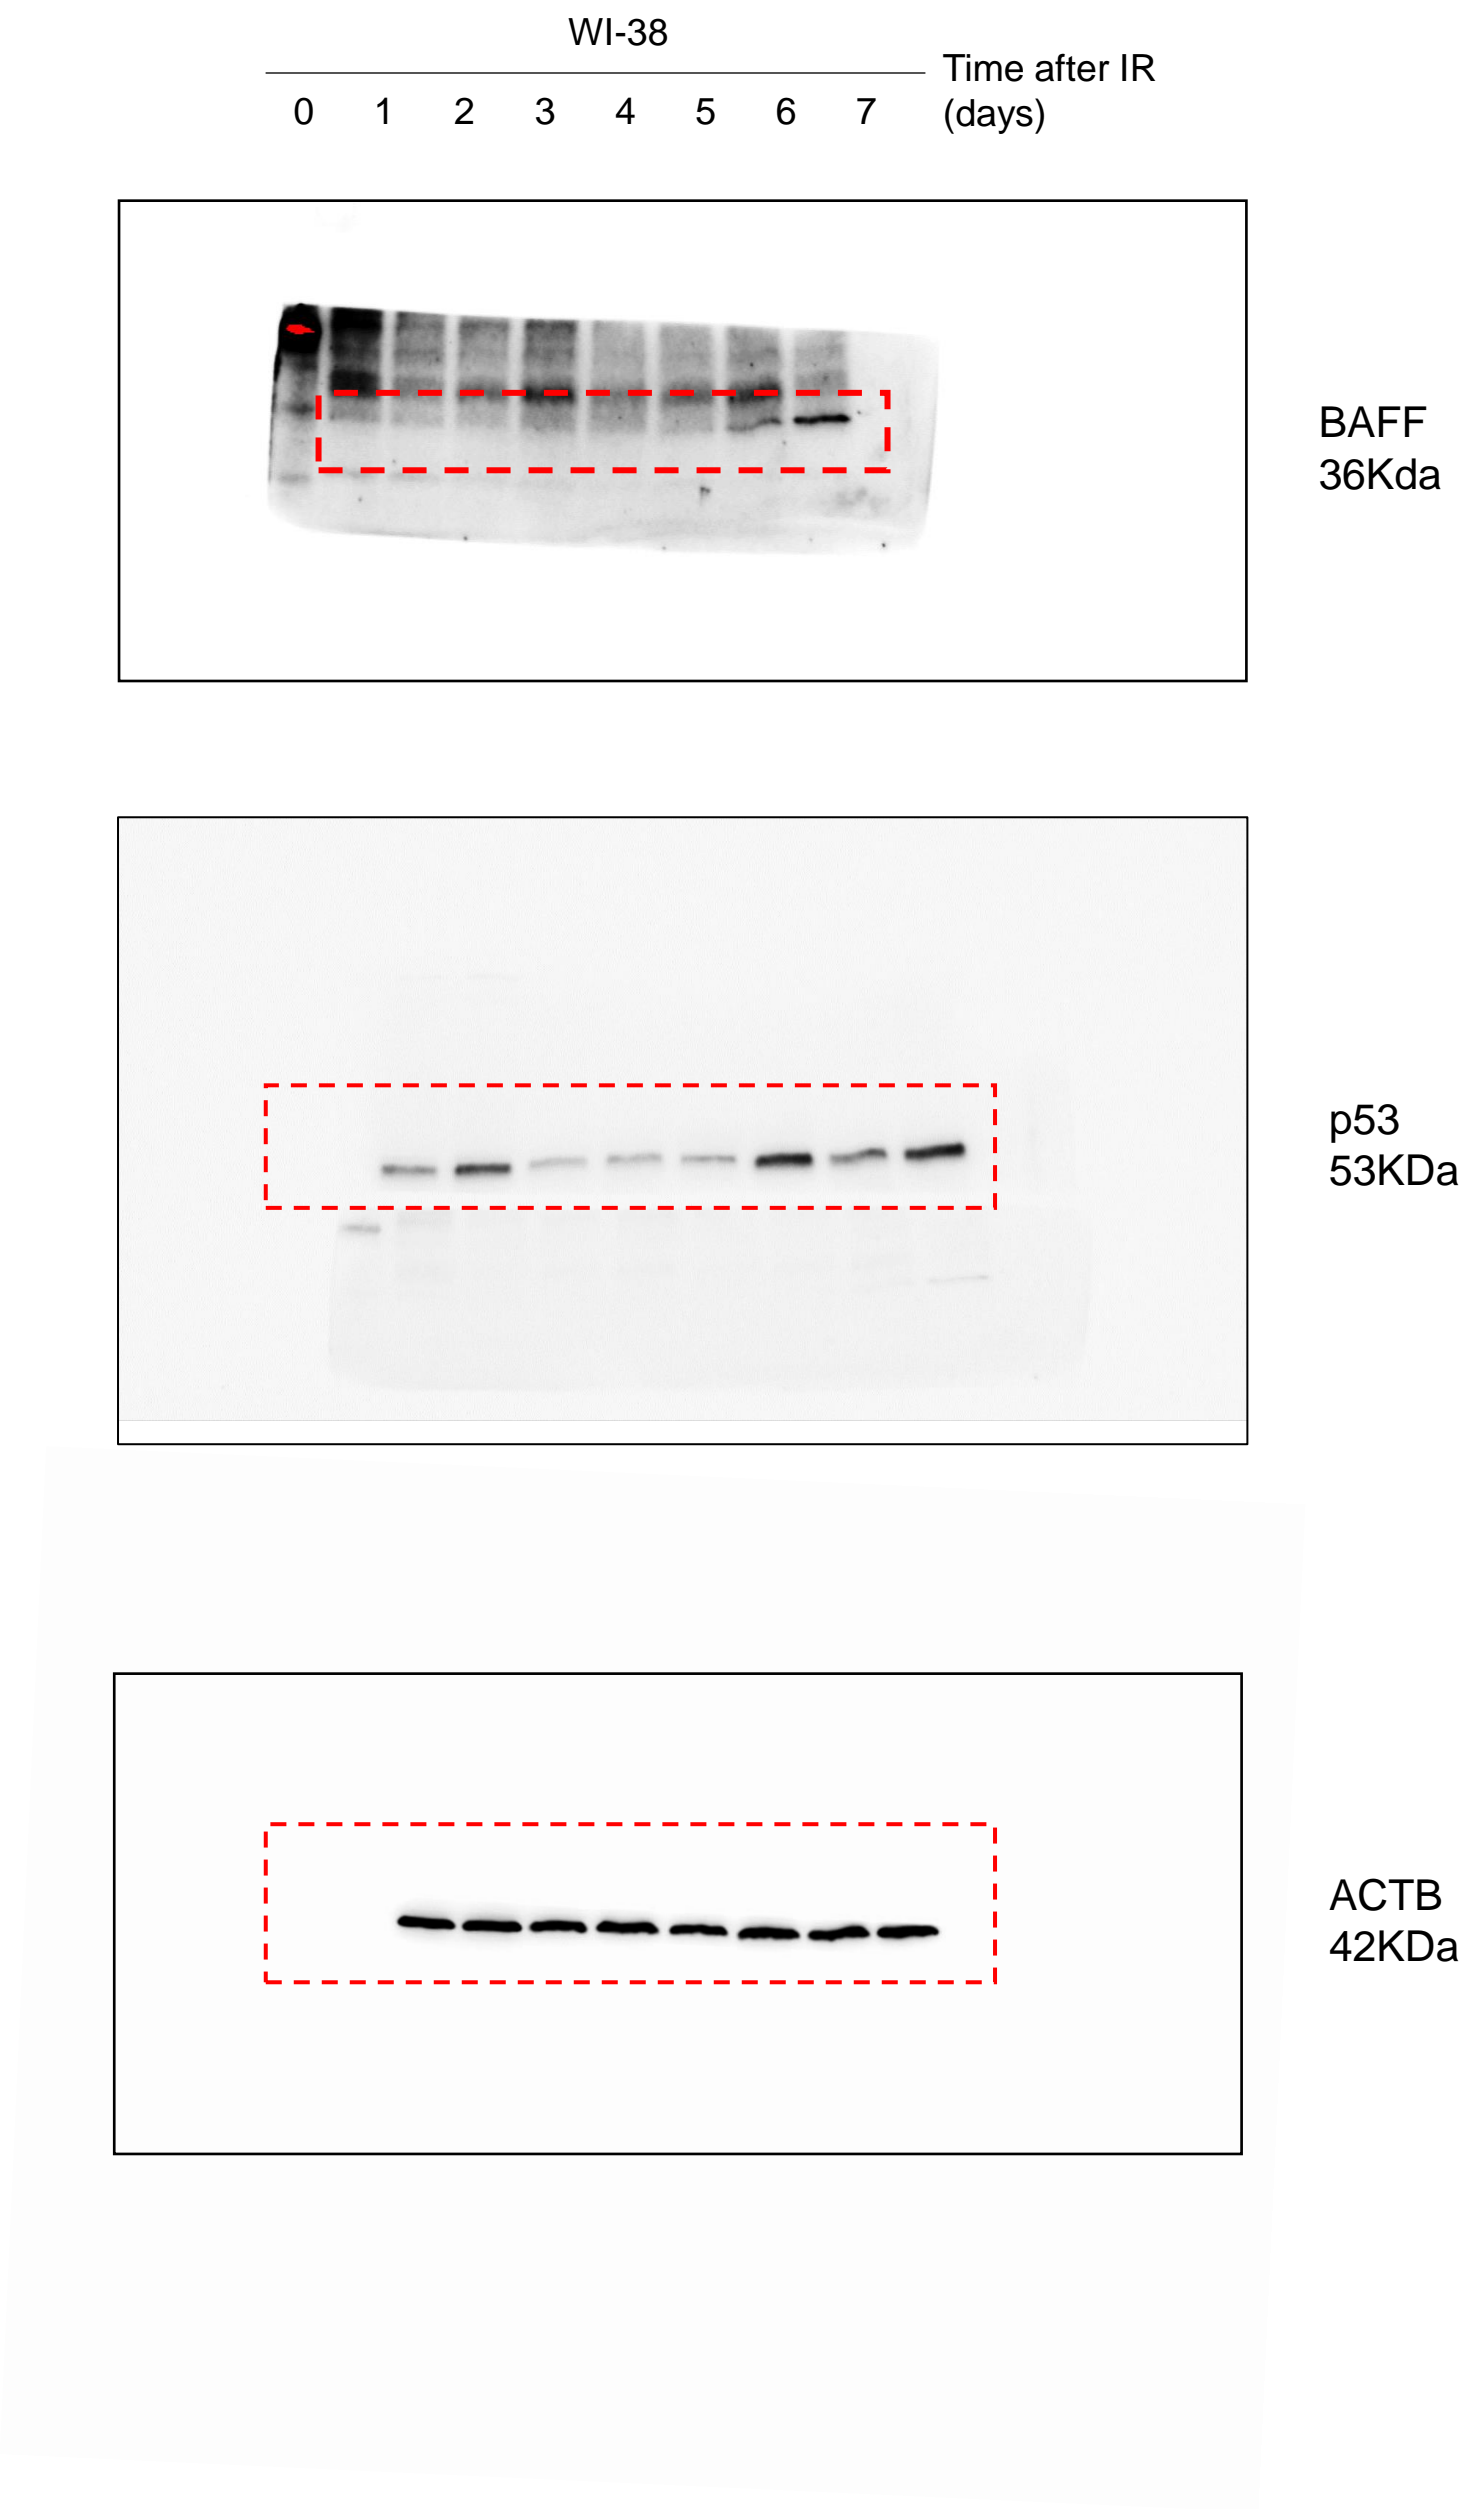

Supplement: fig6-figsupp1-data1 [file elife-84238-fig6-figsupp1-data1-v1.zip]

A

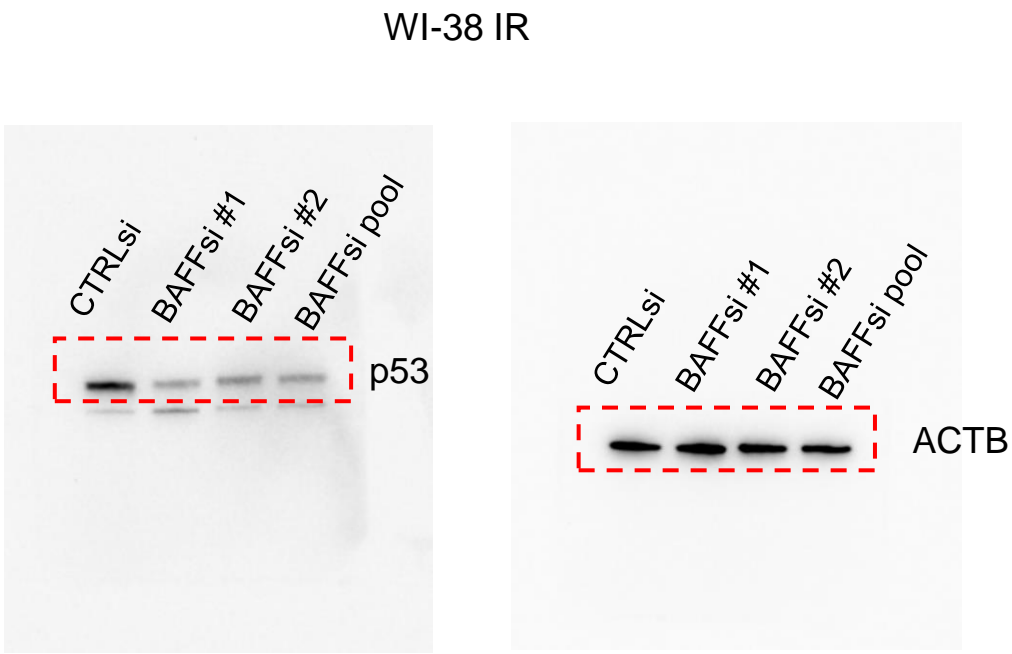

B

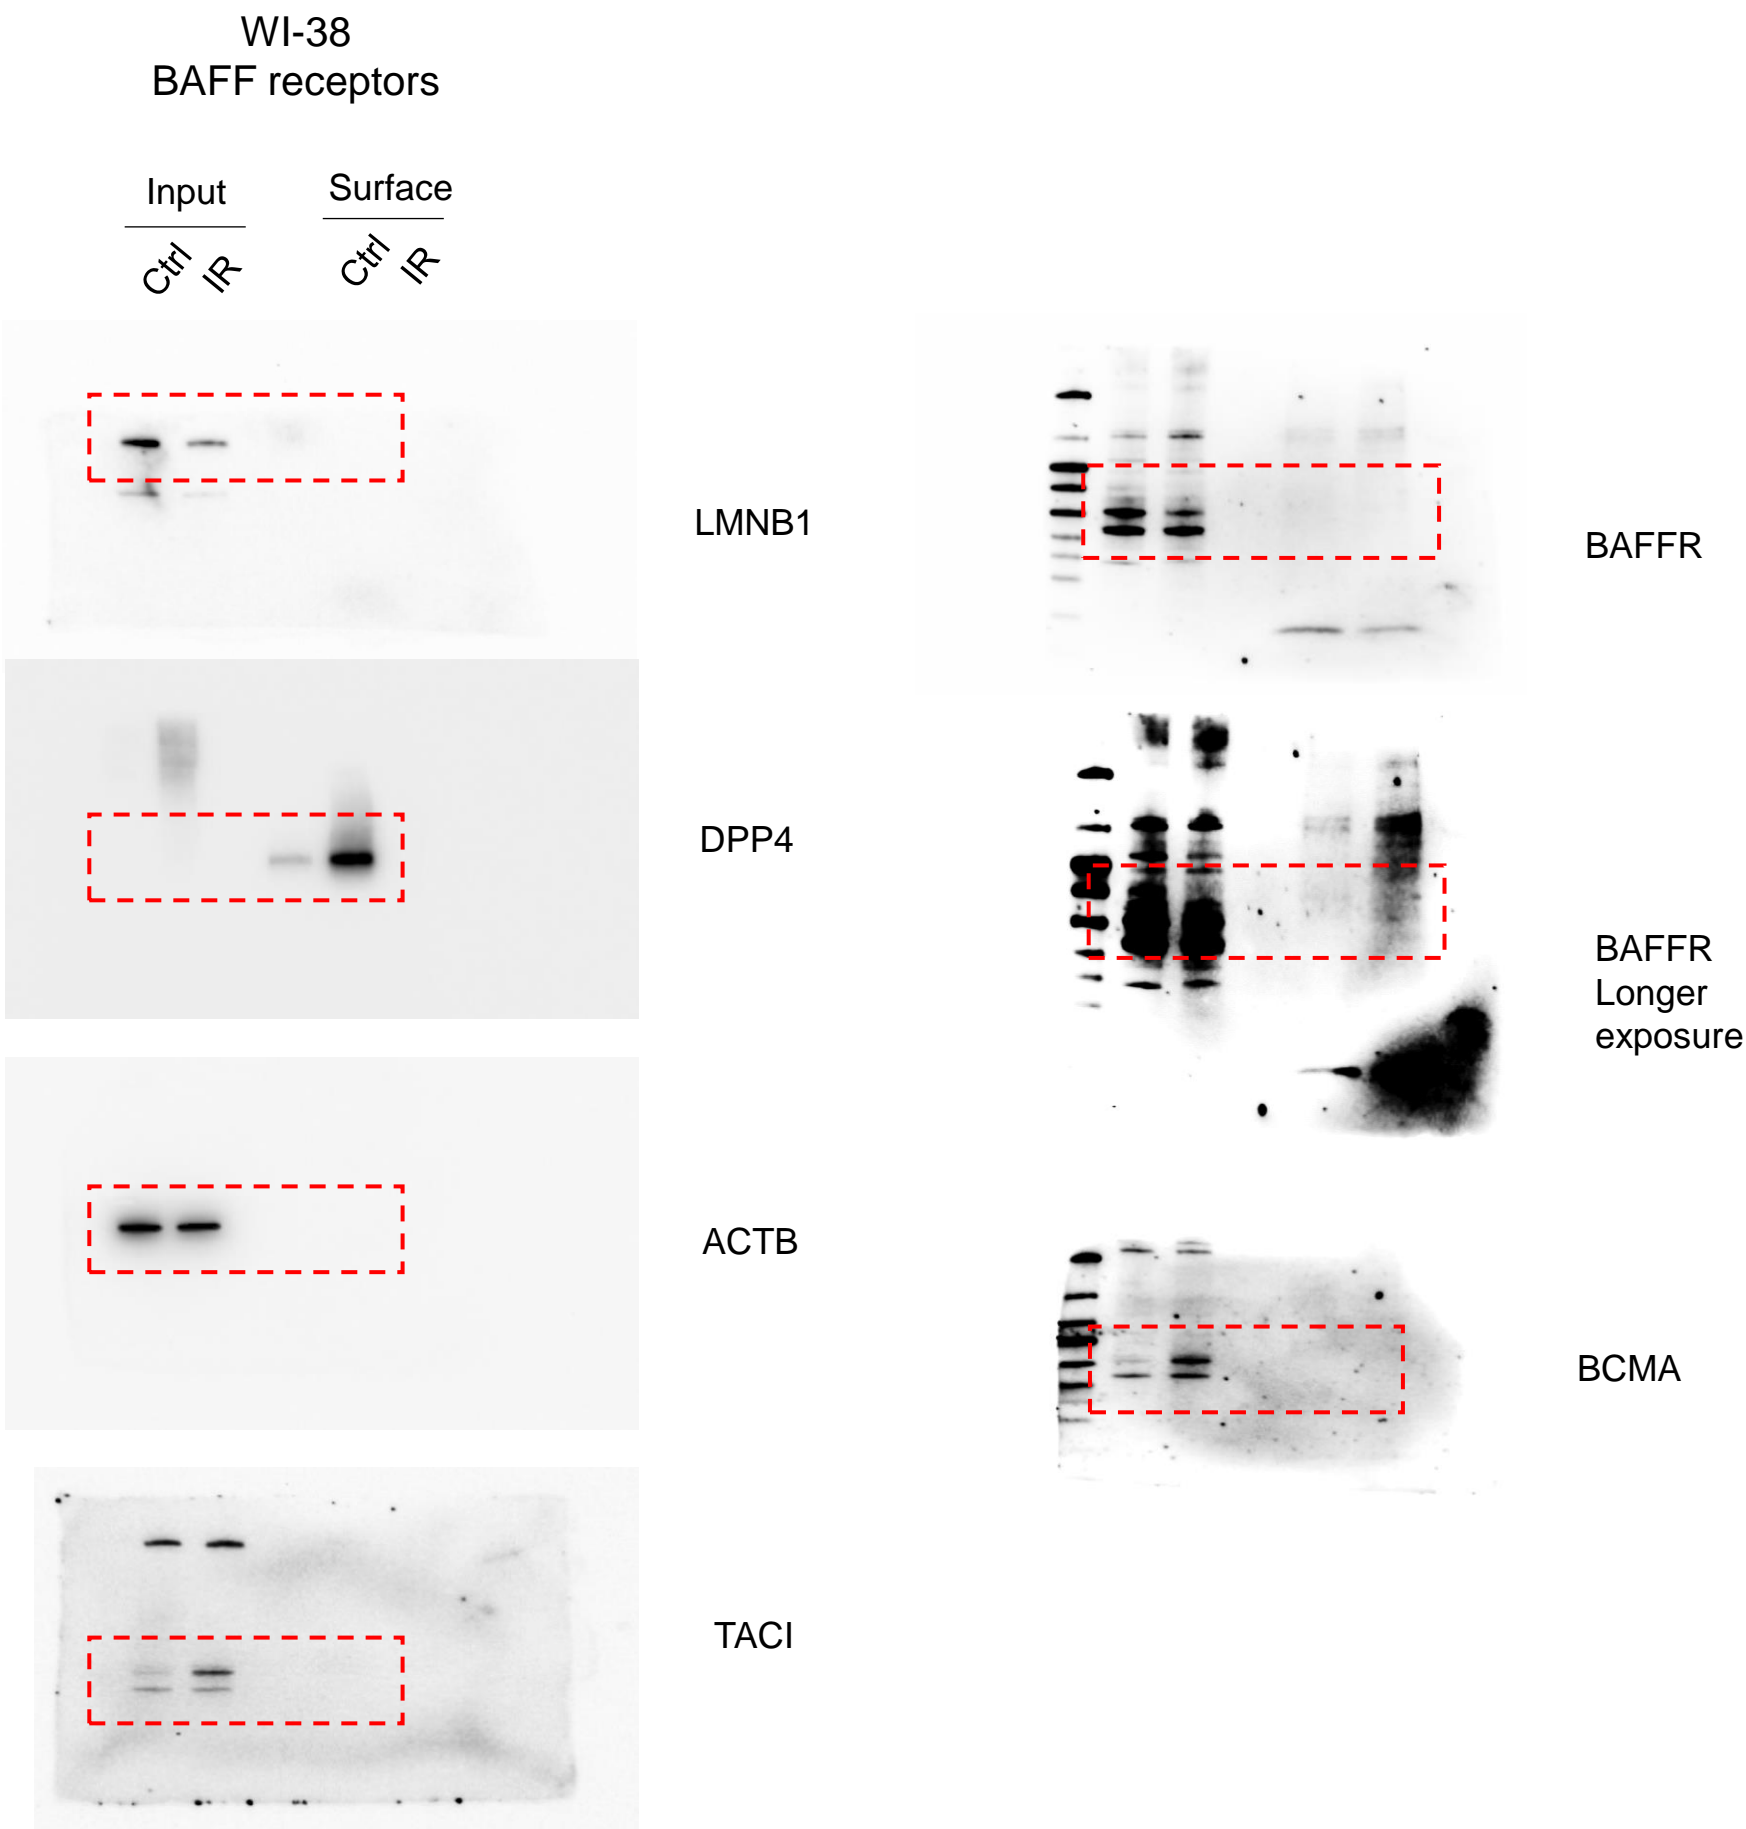

C

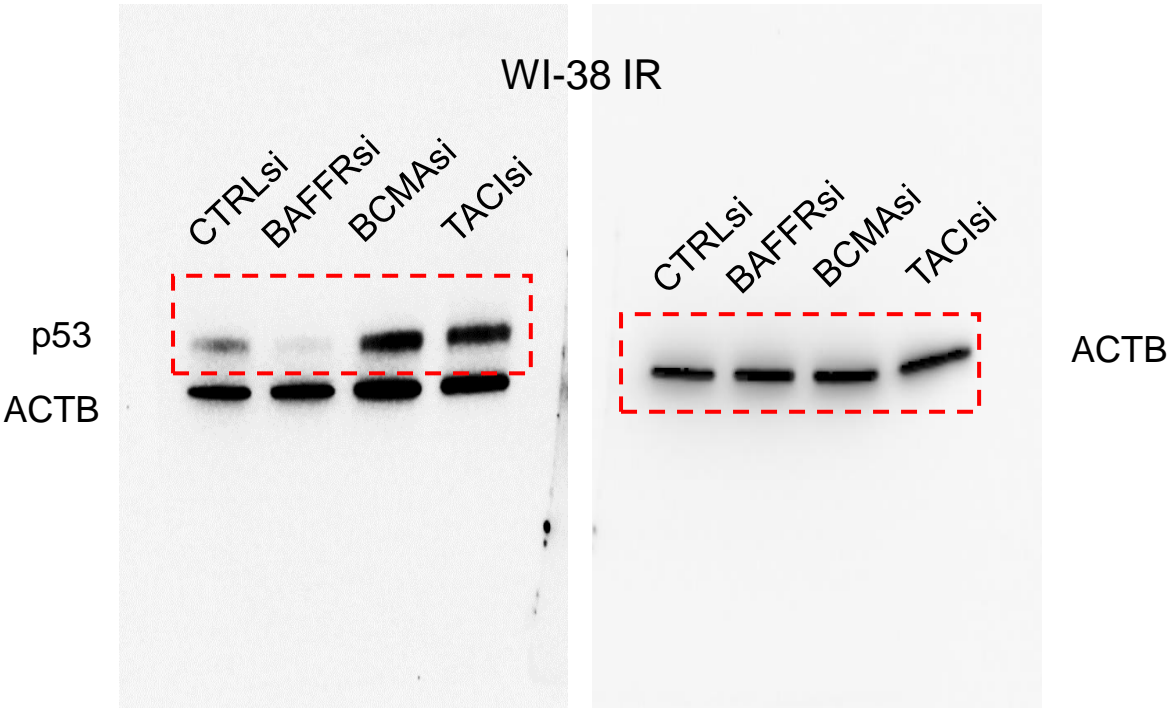

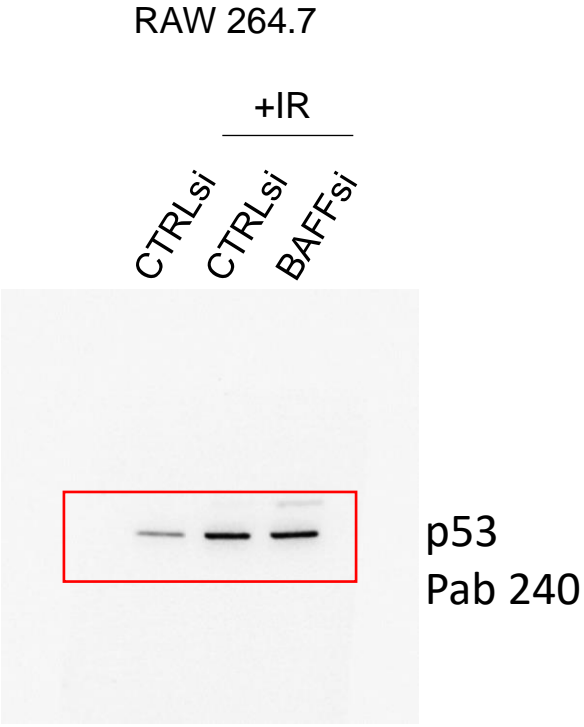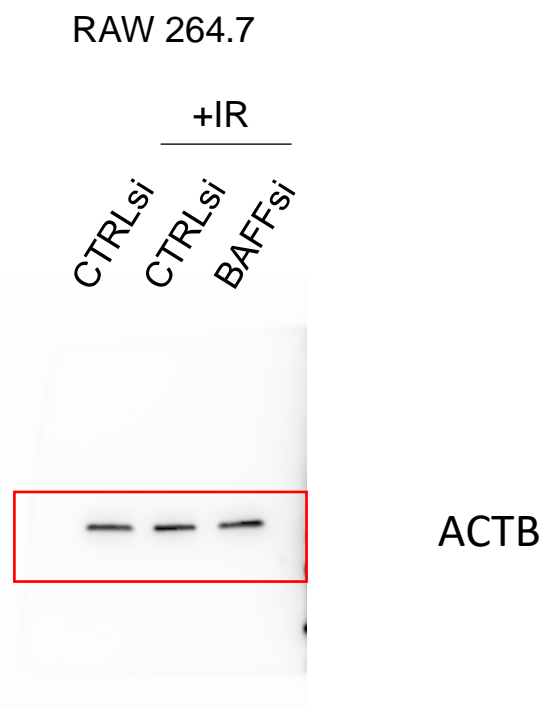

Supplement: fig7-figsupp1-data1 [file elife-84238-fig7-figsupp1-data1-v1.zip]
